# Supplementary material for: Visible light-promoted radical cyclization of silicon-tethered alkyl iodide and phenyl alkyne. An efficient approach to synthesize benzosilolines
Source: Royal Society of Chemistry journal article supplement (doi:10.1039/c6cc00635c), 2016-01-01

# Visible Light-Promoted Radical Cyclization of Silicon-Tethered Alkyl Iodide and Phenyl Alkyne. An Efficient Approach to Synthesize Benzosilolines

Xinglong Lin<sup>a</sup>, Zubao Gan<sup>a</sup>, Ji Lu<sup>a</sup>, Ji Lu<sup>a</sup>, Zhishan Su<sup>c</sup>, Changwei Hu<sup>c</sup>, Yuebao Zhang<sup>a</sup>, Yuebao Zhang<sup>a</sup>,  
Ya Wu<sup>a</sup>, Lu Gao<sup>a\*</sup> and Zhenlei Song<sup>a, b\*</sup>

<sup>a</sup> Key Laboratory of Drug-Targeting of Education Ministry and Department of Medicinal Chemistry, West China School of Pharmacy, Sichuan University, Chengdu 610041, China. <sup>b</sup> State Key Laboratory of Biotherapy, West China Hospital, Sichuan University, Chengdu 610041, China. <sup>c</sup> Key Laboratory of Green Chemistry and Technology, Ministry of Education, College of Chemistry, Sichuan University, Chengdu 610064 China

E-mail: zhenleisong@scu.edu.cn

## Supporting Information

### Table of Contents

|                                                                      |                 |
|----------------------------------------------------------------------|-----------------|
| <b>1. General Methods</b> .....                                      | <b>S2</b>       |
| <b>2. General Procedure and Spectral Data</b> .....                  | <b>S2-S25</b>   |
| <b>2.1. Synthesis of 1a-1t</b> .....                                 | <b>S2-S11</b>   |
| <b>2.2. Synthesis of 2a-2k and 3a-3h</b> .....                       | <b>S12-S20</b>  |
| <b>2.3. Mechanistic study</b> .....                                  | <b>S20-S21</b>  |
| <b>2.4 Functionalization of 3a</b> .....                             | <b>S21-S24</b>  |
| <b>3. Computational Studies</b> .....                                | <b>S25-S29</b>  |
| <b>4. <sup>1</sup>H and <sup>13</sup>C NMR Spectral Copies</b> ..... | <b>S30-S130</b> |

## 1. General Methods

Commercial reagents were used without any purification. Ru(bpy)<sub>3</sub>Cl<sub>2</sub>•6H<sub>2</sub>O was purchased from J&K Scientific. All reactions were performed using common anhydrous, inert atmosphere techniques. Reactions were monitored by TLC which was performed on glass-backed silica plates and visualized using UV, KMnO<sub>4</sub> stains, H<sub>3</sub>PO<sub>4</sub>•12MoO<sub>3</sub>/EtOH stains, H<sub>2</sub>SO<sub>4</sub>(conc.)/anisaldehyde/EtOH stains. Column chromatography was performed using silica gel (200-300 mesh) eluting with EtOAc/petroleum ether. <sup>1</sup>H NMR spectra were recorded at 400 MHz (Varian) and 600 MHz (Agilent), and <sup>13</sup>C NMR spectra were recorded at 100 MHz (Varian) and 150 MHz (Agilent) using CDCl<sub>3</sub> (except where noted) with TMS or residual solvent as standard. Infrared spectra were obtained using KCl plates on a VECTOR22. High-resolution mass spectral analyses performed on Waters Q-TOF. CH<sub>3</sub>CN, DMSO, DMF, CH<sub>2</sub>Cl<sub>2</sub>, TMEDA and Et<sub>3</sub>N were distilled from CaH<sub>2</sub>. Et<sub>2</sub>O and THF were distilled from sodium. All spectral data obtained for new compounds are reported here.

## 2. Experimental Procedures and Spectral Data of Products

### 2.1. General Procedure to Synthesize 1a-1t

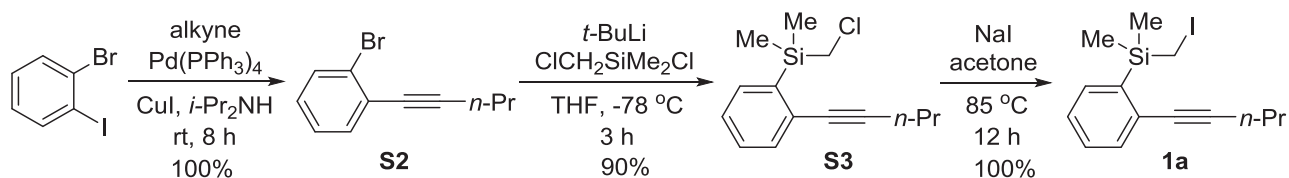

To a solution of 1-bromo-2-iodobenzene (1.0 g, 3.53 mmol) in *i*-Pr<sub>2</sub>NH (15 mL) was added CuI (27 mg, 0.14 mmol), Pd(PPh<sub>3</sub>)<sub>4</sub> (87 mg, 0.07 mmol). The solution was degassed by three freeze-pump-thaw cycles followed by adding 1-pentyne (365 μL, 3.71 mmol) dropwise. The resulting mixture was stirred at room temperature until the starting material was completely consumed (monitored by TLC analysis). The reaction mixture was filtered by Celite and concentrated under reduced pressure. Purification of the crude residue via silica gel flash column chromatography (eluent: petroleum ether) afforded 1-bromo-2-alkynylbenzene S2 as a colorless liquid (787 mg, quantitative).

To a solution of S2 (787 mg, 3.53 mmol) in dry THF (10 mL) in a flame-dried flask under Ar

atmosphere was added *t*-BuLi (5.5 mL of 1.3 M solution in pentane, 7.15 mmol) dropwise at -78 °C. After stirring for 40 min, ClCH<sub>2</sub>SiMe<sub>2</sub>Cl (0.56 mL, 4.24mmol) was added dropwise. The reaction mixture was then stirred for 3h at -78 °C before quenched with sat. NH<sub>4</sub>Cl (8 mL). The mixture was extracted with Et<sub>2</sub>O (3 × 5 mL). The combined organic layers were then dried over Na<sub>2</sub>SO<sub>4</sub> and concentrated under reduced pressure. The residue was purified by silica gel flash column chromatography (eluent: petroleum ether) afforded **S3** as a colorless liquid (798 mg, 90% yield).

To a solution of **S3** (798 mg, 3.18 mmol) in dry acetone (8 mL) was added dry NaI (1.43 g, 9.54 mmol). The reaction mixture was refluxed at 85°C overnight. The reaction allowed to cool to room temperature before quenching with saturated solution of Na<sub>2</sub>S<sub>2</sub>O<sub>3</sub> (10 mL).The aqueous layer was extracted with Et<sub>2</sub>O (3 × 5 mL). The combined organic layer was dried over anhydrous Na<sub>2</sub>SO<sub>4</sub> and concentrated in vacuo. The residue was purified by silica gel flash column chromatography afforded (eluent: petroleum ether) afforded **1a** as a colorless liquid (1.08 g, quantitative).

### Preparation of 1a

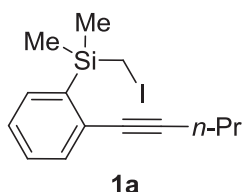

**1a**: <sup>1</sup>H NMR (400 MHz, CDCl<sub>3</sub>) δ 7.46 (dd, *J*<sub>1</sub> = 7.2 Hz, *J*<sub>2</sub> = 1.6 Hz, 1H), 7.42 (d, *J*<sub>1</sub> = 7.2 Hz, *J*<sub>2</sub> = 1.6 Hz, 1H), 7.31 (dt, *J*<sub>1</sub> = 7.2 Hz, *J*<sub>2</sub> = 1.6 Hz, 1H), 7.26 (dt, *J*<sub>1</sub> = 7.2 Hz, *J*<sub>2</sub> = 1.6 Hz, 1H), 2.43 (s, 2H), 2.41 (t, *J* = 7.2 Hz, 2H), 1.65 (tq, *J*<sub>1</sub> = 7.2 Hz, *J*<sub>2</sub> = 7.2 Hz, 2H), 1.06 (t, *J* = 7.2 Hz, 3H), 0.51 (s, 6H); <sup>13</sup>C NMR (100 MHz, CDCl<sub>3</sub>) δ 138.4, 134.2, 132.6, 129.3, 129.2, 126.9, 93.7, 81.9, 22.1, 21.6, 13.8, -2.6, -13.2; IR (neat) cm<sup>-1</sup> 2962s, 2934m, 2901m, 2873m, 2196w, 1462m, 1430m, 1374m, 1251s, 1126m, 1076m, 819s; HRMS (ESI-TOF, m/z) calcd for C<sub>14</sub>H<sub>19</sub>INaSi (M+Na)<sup>+</sup>: 365.0193, found 365.0197.

### Preparation of 1b

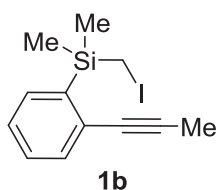

**1b**: Using the same procedure as that used for **1a** afforded **1b** as a colorless liquid (238 mg, 62% overall yield from **S2-1b**).  $^1\text{H}$  NMR (400 MHz,  $\text{CDCl}_3$ )  $\delta$  7.46 (dd,  $J_1 = 7.2$  Hz,  $J_2 = 1.6$  Hz, 1H), 7.41 (d,  $J_1 = 7.2$  Hz,  $J_2 = 1.6$  Hz, 1H), 7.31 (dt,  $J_1 = 7.2$  Hz,  $J_2 = 1.6$  Hz, 1H), 7.26 (dt,  $J_1 = 7.2$  Hz,  $J_2 = 1.6$  Hz, 1H), 2.41 (s, 2H), 2.07 (s, 3H), 0.50 (s, 6H);  $^{13}\text{C}$  NMR (150 MHz,  $\text{CDCl}_3$ )  $\delta$  138.5, 134.3, 132.3, 129.3, 129.2, 126.9, 89.3, 81.1, 4.4, -2.6, -13.3; IR (neat)  $\text{cm}^{-1}$  3050w, 2958w, 2910w, 1583w, 1431w, 1373w, 1251m, 1127w, 1078w, 819m, 797m, 721m; HRMS (ESI-TOF,  $m/z$ ) calcd for  $\text{C}_{12}\text{H}_{16}\text{ISi}$  ( $\text{M}+\text{H}$ ) $^+$ : 315.0060, found 315.0054.

### Preparation of 1c

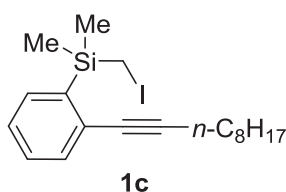

**1c**: Using the same procedure as that used for **1a** afforded **1c** as a colorless liquid (365 mg, 50% overall yield from 1-bromo-2-iodobenzene).  $^1\text{H}$  NMR (400 MHz,  $\text{CDCl}_3$ )  $\delta$  7.45 (dd,  $J_1 = 7.2$  Hz,  $J_2 = 1.6$  Hz, 1H), 7.41 (d,  $J_1 = 7.2$  Hz,  $J_2 = 1.6$  Hz, 1H), 7.30 (dt,  $J_1 = 7.2$  Hz,  $J_2 = 1.6$  Hz, 1H), 7.25 (dt,  $J_1 = 7.2$  Hz,  $J_2 = 1.6$  Hz, 1H), 2.43 (s, 2H), 2.40-2.44 (m, 2H), 1.58-1.63 (m, 2H), 1.43-1.46 (m, 2H), 1.28-1.31 (m, 8H), 0.89 (t,  $J = 7.2$  Hz, 3H), 0.51 (s, 6H);  $^{13}\text{C}$  NMR (100 MHz,  $\text{CDCl}_3$ )  $\delta$  138.4, 134.2, 132.6, 129.4, 129.3, 126.9, 93.9, 81.8, 31.8, 29.2, 29.2, 28.6, 22.6, 19.6, 14.1, -2.6, -13.2; IR (neat)  $\text{cm}^{-1}$  2956s, 2928s, 2855s, 1462m, 1430m, 1372m, 1254s, 1093s, 1064s, 838s, 803s, 759m; HRMS (ESI-TOF,  $m/z$ ) calcd for  $\text{C}_{19}\text{H}_{29}\text{INaSi}$  ( $\text{M}+\text{Na}$ ) $^+$ : 435.0975, found 435.0994.

### Preparation of 1d

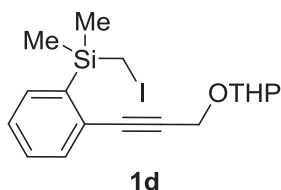

**1d**: Using the same procedure as that used for **1a** afforded **1d** as a colorless liquid (163 mg, 59% overall yield from **S2-1d**).  $^1\text{H}$  NMR (400 MHz,  $\text{CDCl}_3$ )  $\delta$  7.47-7.50 (m, 2H), 7.29-7.36 (m, 2H), 4.88 (t,  $J = 3.2$  Hz, 1H), 4.54 (d,  $J = 16.0$  Hz, 1H), 4.47 (d,  $J = 16.0$  Hz, 1H), 3.86-3.92 (m, 1H), 3.56-3.59 (m, 1H), 2.44 (s, 2H), 1.70-1.87 (m, 2H), 1.55-1.69 (m, 4H), 0.52 (s, 6H);  $^{13}\text{C}$  NMR (150 MHz,  $\text{CDCl}_3$ )  $\delta$  139.1, 134.4, 132.8, 129.4, 127.8, 127.7, 97.0, 96.9, 88.5, 86.9, 62.1, 54.7, 30.3,

25.4, 19.1, 1.0, -2.6, -13.5; IR (neat)  $\text{cm}^{-1}$  2958s, 2872s, 2222m, 2184m, 1715m, 1660m, 1460s, 1437s, 1348m, 1257s, 1180m, 1125s, 1026s, 870s, 762s; HRMS (ESI-TOF,  $m/z$ ) calcd for  $\text{C}_{17}\text{H}_{23}\text{NaO}_2\text{Si}$  ( $\text{M}+\text{Na}$ )<sup>+</sup>: 437.0404, found 437.0405.

### Preparation of 1e

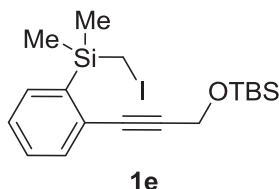

**1e**: Using the same procedure as that used for **1a** afforded **1e** as a colorless liquid (183 mg, 64% overall yield from **S2-1e**). <sup>1</sup>H NMR (600 MHz,  $\text{CDCl}_3$ )  $\delta$  7.48 (d,  $J = 7.2$  Hz, 1H), 7.45 (d,  $J = 7.2$  Hz, 1H), 7.32 (t,  $J = 7.2$  Hz, 1H), 7.30 (t,  $J = 7.2$  Hz, 1H), 4.55 (s, 2H), 2.43 (s, 2H), 0.94 (s, 9H), 0.52 (s, 6H), 0.17 (s, 6H); <sup>13</sup>C NMR (150 MHz,  $\text{CDCl}_3$ )  $\delta$  139.0, 134.4, 132.6, 129.3, 128.0, 127.6, 91.0, 85.8, 52.2, 25.8, 18.3, -2.5, -5.1, -13.4; IR (neat)  $\text{cm}^{-1}$  2955s, 2932s, 2892s, 2857s, 2221m, 2185m, 1692m, 1661m, 1466m, 1369m, 1255m, 1084m, 837m, 764m; HRMS (ESI-TOF,  $m/z$ ) calcd for  $\text{C}_{18}\text{H}_{29}\text{INaOSi}_2$  ( $\text{M}+\text{Na}$ )<sup>+</sup>: 467.0694, found 467.0690.

### Preparation of 1f

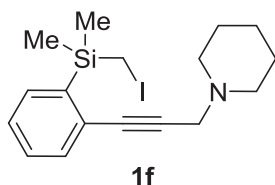

**1f**: Using the same procedure as that used for **1a** afforded **1f** as a colorless liquid (162 mg, 43% overall yield from **S2-1f**). <sup>1</sup>H NMR (400 MHz,  $\text{CDCl}_3$ )  $\delta$  7.46-7.48 (m, 2H), 7.26-7.34 (m, 2H), 3.52 (s, 2H), 2.57 (brs, 2H), 2.42 (s, 2H), 1.62-1.67 (m, 4H), 1.42-1.48 (m, 2H), 0.51 (s, 6H); <sup>13</sup>C NMR (100 MHz,  $\text{CDCl}_3$ )  $\delta$  138.5, 134.3, 133.1, 129.4, 128.4, 127.4, 88.7, 86.1, 53.5, 48.6, 25.9, 23.9, -2.6, -13.3; IR (neat)  $\text{cm}^{-1}$  2934s, 2854s, 2753s, 2679m, 1461m, 1431m, 1338m, 1252m, 1110m, 1075m, 999m, 835s, 819s; HRMS (ESI-TOF,  $m/z$ ) calcd for  $\text{C}_{17}\text{H}_{25}\text{INSi}$  ( $\text{M}+\text{H}$ )<sup>+</sup>: 398.0795, found 398.0800.

### Preparation of 1g

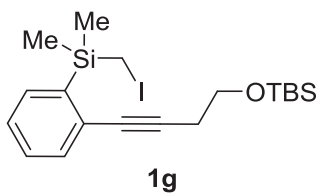

**1g**: Using the same procedure as that used for **1a** afforded **1g** as a colorless liquid (185 mg, 61% overall yield from **S2-1g**).  $^1\text{H}$  NMR (400 MHz,  $\text{CDCl}_3$ )  $\delta$  7.47 (d,  $J = 7.2$  Hz, 1H), 7.43 (d,  $J = 7.2$  Hz, 1H), 7.32 (t,  $J = 7.2$  Hz, 1H), 7.29 (t,  $J = 7.2$  Hz, 1H), 3.85 (t,  $J = 7.2$  Hz, 2H), 2.66 (q,  $J = 7.2$  Hz, 2H), 2.43 (s, 2H), 0.93 (s, 9H), 0.52 (s, 6H), 0.12 (s, 6H);  $^{13}\text{C}$  NMR (100 MHz,  $\text{CDCl}_3$ )  $\delta$  138.6, 134.3, 132.5, 129.3, 128.9, 127.0, 90.5, 82.9, 61.7, 25.9, 24.0, 18.3, -2.6, -5.2, -13.3; IR (neat)  $\text{cm}^{-1}$  2954s, 2931s, 2895s, 2858s, 1466m, 1432m, 1383m, 1254s, 1106s, 838s, 763s; HRMS (ESI-TOF,  $m/z$ ) calcd for  $\text{C}_{19}\text{H}_{31}\text{INaOSi}_2$  ( $\text{M}+\text{Na}$ ) $^+$ : 481.0850, found 481.0856.

### Preparation of 1h

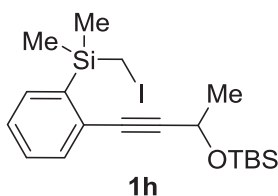

**1h**: Using the same procedure as that used for **1a** afforded **1h** as a colorless liquid (262 mg, 83% overall yield from **S2-1h**).  $^1\text{H}$  NMR (400 MHz,  $\text{CDCl}_3$ )  $\delta$  7.49 (d,  $J = 7.2$  Hz, 1H), 7.46 (d,  $J = 7.2$  Hz, 1H), 7.34 (t,  $J = 7.2$  Hz, 1H), 7.30 (t,  $J = 7.2$  Hz, 1H), 4.77 (q,  $J = 6.4$  Hz, 1H), 2.45 (s, 2H), 1.53 (d,  $J = 6.4$  Hz, 3H), 0.95 (s, 9H), 0.53 (s, 6H), 0.18 (s, 3H), 0.17 (s, 3H);  $^{13}\text{C}$  NMR (100 MHz,  $\text{CDCl}_3$ )  $\delta$  138.7, 134.3, 132.6, 129.3, 128.1, 127.5, 94.9, 84.3, 59.4, 25.8, 25.3, 18.2, -2.6, -4.5, -4.9, -13.4; IR (neat)  $\text{cm}^{-1}$  2955s, 2931s, 2890s, 2857s, 1465m, 1435m, 1368m, 1253s, 1101s, 1053m, 976s, 833s, 759m; HRMS (ESI-TOF,  $m/z$ ) calcd for  $\text{C}_{19}\text{H}_{31}\text{IKOSi}_2$  ( $\text{M}+\text{K}$ ) $^+$ : 497.0590, found 497.0594.

### Preparation of 1i

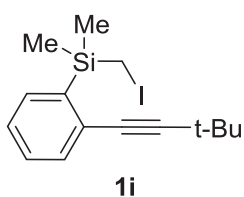

**1i:** Using the same procedure as that used for **1a** afforded **1i** as a colorless liquid (227 mg, 71% overall yield from **S2-1i**).  $^1\text{H}$  NMR (400 MHz,  $\text{CDCl}_3$ )  $\delta$  7.45 (dd,  $J_1 = 7.2$  Hz,  $J_2 = 1.6$  Hz, 1H), 7.41 (d,  $J_1 = 7.2$  Hz,  $J_2 = 1.6$  Hz, 1H), 7.30 (dt,  $J_1 = 7.2$  Hz,  $J_2 = 1.6$  Hz, 1H), 7.24 (dt,  $J_1 = 7.2$  Hz,  $J_2 = 1.6$  Hz, 1H), 2.46 (s, 2H), 1.34 (s, 9H), 0.52 (s, 6H);  $^{13}\text{C}$  NMR (150 MHz,  $\text{CDCl}_3$ )  $\delta$  138.2, 134.2, 132.7, 129.3, 129.2, 126.9, 101.5, 80.6, 30.8, 28.1, -2.7, -13.1; IR (neat)  $\text{cm}^{-1}$  2967s, 2901m, 2867m, 1461m, 1431m, 1367m, 1287m, 1251m, 1126m, 1070m, 817s, 759s; HRMS (ESI-TOF,  $m/z$ ) calcd for  $\text{C}_{15}\text{H}_{21}\text{INaSi}$  ( $\text{M}+\text{Na}$ ) $^+$ : 379.0349, found 379.0356.

### Preparation of 1j

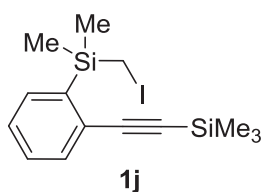

**1j:** Using the same procedure as that used for **1a** afforded **1j** as a colorless liquid (776 mg, 60% overall yield from 1-bromo-2-iodobenzene).  $^1\text{H}$  NMR (600 MHz,  $\text{CDCl}_3$ )  $\delta$  7.49 (d,  $J = 7.2$  Hz, 1H), 7.47 (d,  $J = 7.2$  Hz, 1H), 7.33 (t,  $J = 7.2$  Hz, 1H), 7.30 (t,  $J = 7.2$  Hz, 1H), 2.46 (s, 2H), 0.52 (s, 6H), 0.27 (s, 9H);  $^{13}\text{C}$  NMR (100 MHz,  $\text{CDCl}_3$ )  $\delta$  139.2, 134.3, 132.9, 129.3, 128.2, 127.8, 106.3, 97.7, -0.2, -2.8, -13.5; IR (neat)  $\text{cm}^{-1}$  2959s, 2899m, 2155s, 1461m, 1428m, 1253s, 1125m, 1092m, 1067s, 865s, 803s, 760s; HRMS (ESI-TOF,  $m/z$ ) calcd for  $\text{C}_{14}\text{H}_{21}\text{INaSi}_2$  ( $\text{M}+\text{Na}$ ) $^+$ : 395.0119, found 395.0117.

### Preparation of 1k

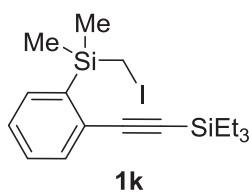

**1k:** Using the same procedure as that used for **1a** afforded **1k** as a colorless liquid (400 mg, 55% overall yield from 1-bromo-2-iodobenzene).  $^1\text{H}$  NMR (400 MHz,  $\text{CDCl}_3$ )  $\delta$  7.51 (d,  $J = 7.2$  Hz, 1H), 7.48 (d,  $J = 7.2$  Hz, 1H), 7.33 (t,  $J = 7.2$  Hz, 1H), 7.30 (t,  $J = 7.2$  Hz, 1H), 2.02 (s, 2H), 1.06 (t,  $J = 7.6$  Hz, 9H), 0.71 (t,  $J = 7.6$  Hz, 6H), 0.53 (s, 9H);  $^{13}\text{C}$  NMR (100 MHz,  $\text{CDCl}_3$ )  $\delta$  138.9, 134.3, 133.6, 129.3, 128.4, 127.7, 107.3, 95.6, 7.5, 4.3, -2.7, -13.4; IR (neat)  $\text{cm}^{-1}$  2956s, 2909m, 2877m,

2151m, 1461m, 1416m, 1373m, 1256s, 1094s, 1065s, 838s, 803s; HRMS (ESI-TOF, m/z) calcd for  $C_{17}H_{28}Si_2$  (M+H)<sup>+</sup>: 415.0769, found 415.0764.

### Preparation of 1l

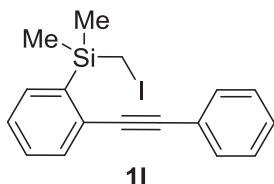

**1l**: Using the same procedure as that used for **1a** afforded **1l** as a colorless liquid (1.22 g, 92% overall yield from 1-bromo-2-iodobenzene). <sup>1</sup>H NMR (400 MHz, CDCl<sub>3</sub>) δ 7.52-7.58 (m, 4H), 7.32-7.40 (m, 5H), 2.50 (s, 2H), 0.58 (s, 6H); <sup>13</sup>C NMR (100 MHz, CDCl<sub>3</sub>) δ 138.8, 134.4, 132.6, 131.3, 129.5, 128.5, 128.4, 128.3, 127.6, 122.9, 92.5, 90.6, -2.5, -13.4; IR (neat) cm<sup>-1</sup> 3053m, 2958m, 1597m, 1492m, 1436m, 1254s, 1124m, 1070m, 816s, 757s; HRMS (ESI-TOF, m/z) calcd for  $C_{17}H_{17}INaSi$  (M+Na)<sup>+</sup>: 399.0036, found 399.0036.

### Preparation of 1m

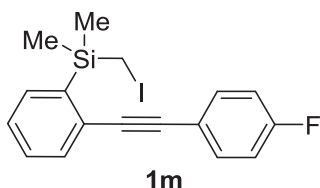

**1m**: Using the same procedure as that used for **1a** afforded **1m** as a colorless liquid (315 mg, 67% overall yield from 1-bromo-2-iodobenzene). <sup>1</sup>H NMR (400 MHz, CDCl<sub>3</sub>) δ 7.48-7.56 (m, 4H), 7.31-7.40 (m, 3H), 7.07 (t, *J* = 8.4 Hz, 2H), 2.47 (s, 2H), 0.57 (s, 6H); <sup>13</sup>C NMR (150 MHz, CDCl<sub>3</sub>) δ 162.6 (d, *J* = 248.8 Hz), 138.8, 134.5, 133.2 (d, *J* = 8.2 Hz), 132.6, 129.5, 128.2, 127.7, 119.1 (d, *J* = 3.5 Hz), 115.9 (d, *J* = 21.9 Hz), 91.5, 90.3, -2.5, -13.5; IR (neat) cm<sup>-1</sup> 3052m, 2959m, 1597s, 1507s, 1465m, 1431m, 1252s, 1130s, 1155m, 1124m, 833s, 759s; HRMS (ESI-TOF, m/z) calcd for  $C_{17}H_{16}FIKSi$  (M+K)<sup>+</sup>: 432.9682, found 432.9681.

### Preparation of 1n

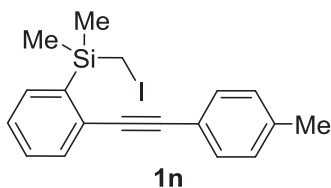



**1n**: Using the same procedure as that used for **1a** afforded **1n** as a colorless liquid (468 mg, 84% overall yield from 1-bromo-2-iodobenzene).  $^1\text{H}$  NMR (400 MHz,  $\text{CDCl}_3$ )  $\delta$  7.57 (dd,  $J_1 = 7.2$  Hz,  $J_2 = 1.6$  Hz, 1H), 7.54 (dd,  $J_1 = 7.2$  Hz,  $J_2 = 1.6$  Hz, 1H), 7.43 (d,  $J = 7.2$  Hz, 1H), 7.39 (dt,  $J_1 = 7.2$  Hz,  $J_2 = 1.6$  Hz, 1H), 7.33 (dt,  $J_1 = 7.2$  Hz,  $J_2 = 1.6$  Hz, 1H), 7.20 (d,  $J = 7.2$  Hz, 1H), 2.51 (s, 2H), 2.38 (s, 3H), 0.59 (s, 6H);  $^{13}\text{C}$  NMR (100 MHz,  $\text{CDCl}_3$ )  $\delta$  138.69, 138.68, 134.4, 132.5, 131.2, 129.5, 129.3, 128.6, 127.4, 119.9, 92.7, 90.0, 21.5, -2.6, -13.3; IR (neat)  $\text{cm}^{-1}$  3050m, 2958m, 2922m, 1581m, 1510s, 1460m, 1431m, 1253s, 1123s, 817s, 759s; HRMS (ESI-TOF,  $m/z$ ) calcd for  $\text{C}_{18}\text{H}_{19}\text{IKSi}$  ( $\text{M}+\text{K}$ ) $^+$ : 428.9932, found 428.9925.

### Preparation of 1o

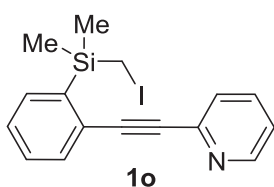

**1o**: Using the same procedure as that used for **1a** afforded **1o** as a colorless liquid (487 mg, 73% overall yield from 1-bromo-2-iodobenzene).  $^1\text{H}$  NMR (400 MHz,  $\text{CDCl}_3$ )  $\delta$  8.64 (d,  $J = 4.8$  Hz, 1H), 7.70 (dt,  $J_1 = 1.6$  Hz,  $J_2 = 7.2$  Hz, 1H), 7.67 (dd,  $J_1 = 1.6$  Hz,  $J_2 = 7.2$  Hz, 1H), 7.55 (dd,  $J_1 = 1.6$  Hz,  $J_2 = 7.2$  Hz, 1H), 7.50 (d,  $J = 7.2$  Hz, 1H), 7.40 (dt,  $J_1 = 1.6$  Hz,  $J_2 = 7.2$  Hz, 1H), 7.36 (dt,  $J_1 = 1.6$  Hz,  $J_2 = 7.2$  Hz, 1H), 7.26 (t,  $J = 7.2$  Hz, 1H), 2.52 (s, 2H), 0.59 (s, 6H);  $^{13}\text{C}$  NMR (100 MHz,  $\text{CDCl}_3$ )  $\delta$  150.2, 143.2, 139.5, 136.2, 134.4, 133.2, 129.4, 128.2, 127.2, 126.8, 122.8, 91.6, 90.2, -2.5, -13.4; IR (neat)  $\text{cm}^{-1}$  3000m, 2217m, 1582m, 1562m, 1467m, 1429m, 1253m, 1126m, 760m; HRMS (ESI-TOF,  $m/z$ ) calcd for  $\text{C}_{16}\text{H}_{16}\text{INNaSi}$  ( $\text{M}+\text{Na}$ ) $^+$ : 399.9989, found 399.9993.

### Preparation of 1p

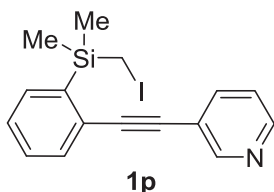

**1p**: Using the same procedure as that used for **1a** afforded **1d** as a colorless liquid (140 mg, 21% overall yield from 1-bromo-2-iodobenzene).  $^1\text{H}$  NMR (400 MHz,  $\text{CDCl}_3$ )  $\delta$  8.76 (s, 1H), 8.57 (dd,  $J_1 = 1.6$  Hz,  $J_2 = 7.2$  Hz, 1H), 7.81 (td,  $J_1 = 1.6$  Hz,  $J_2 = 7.2$  Hz, 1H), 7.59 (d,  $J = 7.2$  Hz, 1H), 7.55 (dd,  $J_1 = 1.6$  Hz,  $J_2 = 7.2$  Hz, 1H), 7.40 (dt,  $J_1 = 1.6$  Hz,  $J_2 = 7.2$  Hz, 1H), 7.36 (dt,  $J_1 = 1.6$  Hz,  $J_2 =$

7.2 Hz, 1H), 7.31 (dd,  $J_1 = 4.8$  Hz,  $J_2 = 7.2$  Hz, 1H), 2.45 (s, 2H), 0.57 (s, 6H);  $^{13}\text{C}$  NMR (100 MHz,  $\text{CDCl}_3$ )  $\delta$  151.8, 148.7, 139.1, 138.2, 134.5, 132.8, 129.5, 128.1, 127.5, 123.2, 120.2, 93.9, 88.9, -2.5, -13.8; IR (neat)  $\text{cm}^{-1}$  3050s, 2959s, 2215m, 1581m, 1560m, 1479s, 1407m, 1254s, 1125m, 1071m, 804m; HRMS (ESI-TOF,  $m/z$ ) calcd for  $\text{C}_{16}\text{H}_{16}\text{INNaSi}$  ( $\text{M}+\text{Na}$ ) $^+$ : 399.9989, found 399.9990.

### Preparation of 1q

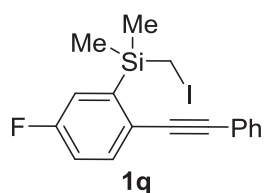

**1q**: Using the same procedure as that used for **1a** afforded **1q** as a colorless liquid (320 mg, 82% overall yield from 2-bromo-4-fluoro-1-iodobenzene).  $^1\text{H}$  NMR (400 MHz,  $\text{CDCl}_3$ )  $\delta$  7.55 (dd,  $J_1 = 5.6$  Hz,  $J_2 = 8.4$  Hz, 1H), 7.50-7.52 (m, 2H), 7.37-7.38 (m, 3H), 7.21 (dd,  $J_1 = 2.4$  Hz,  $J_2 = 8.4$  Hz, 1H), 7.06 (dt,  $J_1 = 2.4$  Hz,  $J_2 = 8.4$  Hz, 1H), 2.47 (s, 2H), 0.58 (s, 6H);  $^{13}\text{C}$  NMR (100 MHz,  $\text{CDCl}_3$ )  $\delta$  162.0 (d,  $J = 250.9$  Hz), 142.2 (d,  $J = 4.7$  Hz), 134.7 (d,  $J = 7.1$  Hz), 131.5, 131.2, 128.54, 128.53, 128.3, 121.3 (d,  $J = 19.8$  Hz), 116.6 (d,  $J = 22.1$  Hz), 92.1, 89.7, -2.7, -14.3; IR (neat)  $\text{cm}^{-1}$  3059m, 2959m, 2215m, 1714m, 1587m, 1566m, 1493s, 1465s, 1256s, 1207s, 906m, 832s, 804s, 756s; HRMS (ESI-TOF,  $m/z$ ) calcd for  $\text{C}_{17}\text{H}_{16}\text{FIKSi}$  ( $\text{M}+\text{K}$ ) $^+$ : 432.9682, found 432.9681.

### Preparation of 1r

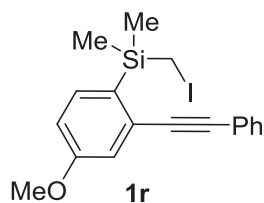

**1r**: Using the same procedure as that used for **1a** afforded **1r** as a colorless liquid (80 mg, 20% overall yield 4-bromo-3-iodoanisole).  $^1\text{H}$  NMR (400 MHz,  $\text{CDCl}_3$ )  $\delta$  7.52-7.54 (m, 2H), 7.43 (d,  $J = 8.0$  Hz, 1H), 7.37-7.41 (m, 3H), 7.12 (d,  $J = 2.8$  Hz, 1H), 6.90 (dd,  $J_1 = 2.8$  Hz,  $J_2 = 8.0$  Hz, 1H), 3.84 (s, 3H), 2.46 (s, 2H), 0.55 (s, 6H);  $^{13}\text{C}$  NMR (100 MHz,  $\text{CDCl}_3$ )  $\delta$  160.4, 135.9, 131.4, 129.9, 129.7, 128.54, 128.53, 122.9, 117.7, 114.3, 92.2, 90.5, 55.2, 1.0, -2.4, -12.9; IR (neat)  $\text{cm}^{-1}$  2958s,

2933s, 1588s, 1553m, 1491m, 1466s, 1404m, 1317m, 1254s, 1223s, 1072s, 1031m, 816s, 756s; HRMS (ESI-TOF, m/z) calcd for C<sub>18</sub>H<sub>19</sub>IKOSi (M+K)<sup>+</sup>: 444.9881, found 444.9875.

### Preparation of 1s

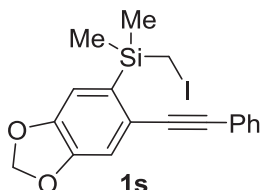

**1s**: Using the same procedure as that used for **1a** afforded **1d** as a colorless liquid (195 mg, 47% overall yield from 5-bromo-4-iodo-methylenedioxybenzene). <sup>1</sup>H NMR (400 MHz, CDCl<sub>3</sub>) δ 7.48-7.50 (m, 2H), 7.32-7.39 (m, 3H), 7.05 (s, 1H), 6.96 (s, 1H), 5.99 (s, 2H), 2.51 (s, 2H), 0.55 (s, 6H); <sup>13</sup>C NMR (100 MHz, CDCl<sub>3</sub>) δ 148.6, 147.6, 133.1, 131.1, 128.5, 128.3, 123.1, 122.3, 113.9, 113.0, 91.2, 90.6, -2.4, -13.3; IR (neat) cm<sup>-1</sup> 2958m, 2897s, 1596s, 1497s, 1474s, 1384m, 1338s, 1232s, 1041s, 935s, 838s, 811s; HRMS (ESI-TOF, m/z) calcd for C<sub>18</sub>H<sub>18</sub>IO<sub>2</sub>Si (M+H)<sup>+</sup>: 421.0115, found 421.0118.

### Preparation of 1t

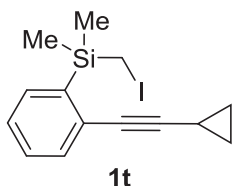

**1t**: Using the same procedure as that used for **1a** afforded **1t** as a colorless liquid (288 mg, 71% overall yield from 1-bromo-2-iodobenzene). <sup>1</sup>H NMR (400 MHz, CDCl<sub>3</sub>) δ 7.44 (d, *J* = 7.2 Hz, 1H), 7.40 (d, *J* = 7.2 Hz, 1H), 7.29 (t, *J* = 7.2 Hz, 1H), 7.24 (t, *J* = 7.2 Hz, 1H), 2.41 (s, 2H), 1.45-1.54 (m, 1H), 0.84-0.92 (m, 2H), 0.80-0.83 (m, 2H), 0.49 (s, 6H); <sup>13</sup>C NMR (100 MHz, CDCl<sub>3</sub>) δ 138.5, 134.2, 132.5, 129.4, 129.1, 126.8, 112.5, 96.6, 8.2, 0.3, -2.7, -13.2; IR (neat) cm<sup>-1</sup> 3008w, 2958w, 2221w, 1462w, 1430w, 1250m, 1127w, 837m, 816m, 758m; HRMS (ESI-TOF, m/z) calcd for C<sub>14</sub>H<sub>17</sub>IKSi (M+K)<sup>+</sup>: 378.9776, found 378.9774.

## **2.2. General Procedure to Synthesize 2 and 3**

A flame dried 10 mL borosilicate reaction tube was equipped with a rubber septum and magnetic stir bar and was charged with **1a** (34.2 mg, 0.10 mmol), Ru(bpy)<sub>3</sub>Cl<sub>2</sub>•6H<sub>2</sub>O (1.5 mg, 2.0

$\mu\text{mol}$ ), TMEDA (30  $\mu\text{L}$ , 0.20 mmol), DMSO (71  $\mu\text{L}$ , 1.0 mmol) and MeCN (2.0 mL). The mixture was degassed via the freeze-pump-thaw method and  $\text{PhSiH}_3$  (62  $\mu\text{L}$ , 0.5 mmol) was added via syringe. The reaction mixture was then placed at a distance of  $\sim 5$  cm from 23 W household compact fluorescent lamp (Philips Tornado 23W CFL) and stirred at room temperature overnight. Upon the reaction was complete (monitored by TLC analysis), the mixture was quenched with water (2.0 mL) and extracted with  $\text{Et}_2\text{O}$  ( $3 \times 5$  mL). The combined organic layers were then dried over  $\text{Na}_2\text{SO}_4$  and concentrated in vacuo. Purification of the crude residue via silica gel flash column chromatography (eluent: petroleum ether) afforded **2a** as a colorless liquid (17.2 mg,  $Z:E \geq 95:5$ ).

The same procedure as that used for **2a** was employed to synthesize **2b-2k**. The same procedure as that used for **2a** except for without DMSO was employed to synthesize **3a-3h**. Gradient eluent: petroleum ether: EtOAc = 5:1 $\rightarrow$ 2:1 for **3d** and **3e**; petroleum ether: EtOAc = 400:1 for **2d**; petroleum ether: EtOAc = 100:1 $\rightarrow$ 10:1 for **2f**.

#### Preparation of 2a

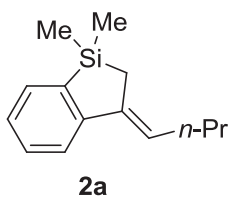

**2a**:  $^1\text{H}$  NMR (400 MHz,  $\text{CDCl}_3$ )  $\delta$  7.61 (d,  $J = 7.2$  Hz, 1H), 7.52 (d,  $J = 7.2$  Hz, 1H), 7.32 (t,  $J = 7.2$  Hz, 1H), 7.20 (t,  $J = 7.2$  Hz, 1H), 6.13 (tt,  $J_1 = 7.2$  Hz,  $J_2 = 2.4$  Hz, 1H), 2.23 (q,  $J = 7.2$  Hz, 2H), 1.71 (s, 2H), 1.49 (tq,  $J_1 = 7.2$  Hz,  $J_2 = 7.2$  Hz, 2H), 0.96 (t,  $J = 7.2$  Hz, 3H), 0.30 (s, 6H);  $^{13}\text{C}$  NMR (150 MHz,  $\text{CDCl}_3$ )  $\delta$  150.6, 140.7, 139.7, 132.1, 129.5, 126.6, 124.3, 121.0, 31.7, 22.7, 16.2, 14.0, -1.8; IR (neat)  $\text{cm}^{-1}$  3053m, 2960s, 2930s, 2871s, 1678m, 1585m, 1460m, 1440m, 1251s, 1131s, 1030m, 844s, 759s; HRMS (ESI-TOF,  $m/z$ ) calcd for  $\text{C}_{14}\text{H}_{20}\text{NaSi}$  ( $\text{M}+\text{Na}$ ) $^+$ : 239.1226, found 239.1222.

#### Preparation of 2b

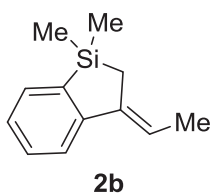

**2b**: Using the same procedure as that used for **2a** afforded **2b** as a colorless liquid (19 mg, 68% yield, *Z*:*E* = 90:10). <sup>1</sup>H NMR (400 MHz, CDCl<sub>3</sub>) δ 7.61 (d, *J* = 7.2 Hz, 1H), 7.54 (d, *J* = 7.2 Hz, 1H), 7.33 (t, *J* = 7.2 Hz, 1H), 7.22 (t, *J* = 7.2 Hz, 1H), 6.23 (m, 1H, *Z*-isomer), 5.73 (m, 1H, *E*-isomer), 1.98 (s, 2H, *E*-isomer), 1.97 (d, *J* = 6.8 Hz, 2H, *E*-isomer), 1.87 (d, *J* = 6.8 Hz, 2H, *Z*-isomer), 1.72 (s, 2H, *Z*-isomer), 0.33 (s, 6H, *Z*-isomer), 0.31 (s, 6H, *E*-isomer); <sup>13</sup>C NMR (100 MHz, CDCl<sub>3</sub>) δ 150.4, 140.6, 140.5, 132.1, 129.5, 126.5, 120.9, 118.3, 15.8, 15.0, -1.7; IR (neat) cm<sup>-1</sup> 3054m, 2961s, 2867s, 1679s, 1586w, 1560w, 1442m, 1251s, 1133s, 1065m, 845s, 827s, 760s; HRMS (ESI-TOF, *m/z*) calcd for C<sub>12</sub>H<sub>16</sub>NaSi (M+Na)<sup>+</sup>: 211.0913, found 211.0914.

### Preparation of 2c

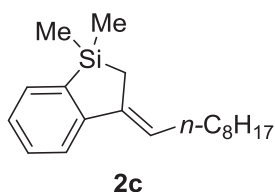

**2c**: Using the same procedure as that used for **2a** afforded **2c** as a colorless liquid (32 mg, 55% yield, *Z*:*E* = 86:14). <sup>1</sup>H NMR (400 MHz, CDCl<sub>3</sub>) δ 7.60 (d, *J* = 7.2 Hz, 1H), 7.51 (d, *J* = 7.2 Hz, 1H), 7.32 (t, *J* = 7.2 Hz, 1H), 7.25 (t, *J* = 7.2 Hz, 1H), 6.12 (t, *J* = 7.2 Hz, 1H, *Z*-isomer), 5.58 (t, *J* = 7.2 Hz, 1H, *E*-isomer), 2.35-2.40 (m, 2H, *E*-isomer), 2.23-2.27 (m, 2H, *Z*-isomer), 1.87 (s, 2H, *E*-isomer), 1.70 (s, 2H, *Z*-isomer), 1.46-1.47 (m, 2H), 1.28-1.36 (m, 10H), 0.88 (t, *J* = 7.2 Hz, 3H), 0.30 (s, 6H, *Z*-isomer), 0.28 (s, 6H, *E*-isomer); *Z*-isomer <sup>13</sup>C NMR (100 MHz, CDCl<sub>3</sub>) δ 150.6, 140.6, 139.5, 132.1, 129.5, 126.6, 124.6, 121.0, 31.9, 29.6, 29.5, 29.4, 29.3, 22.7, 16.2, 14.1, -1.8, -2.8; IR (neat) cm<sup>-1</sup> 3053m, 2955s, 2925s, 2855s, 1680s, 1560m, 1461s, 1441s, 1251s, 1131s, 1062m, 843s, 765s; HRMS (ESI-TOF, *m/z*) calcd for C<sub>19</sub>H<sub>30</sub>KSi (M+K)<sup>+</sup>: 325.1748, found 325.1760.

### Preparation of 2d

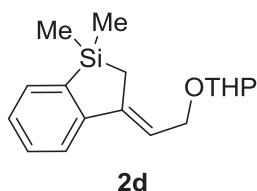

**2d**: Using the same procedure as that used for **2a** afforded **2d** as a colorless liquid (19 mg, 65% yield, *Z*:*E* = 83:17) as colorless liquid. *Z*-isomer <sup>1</sup>H NMR (400 MHz, CDCl<sub>3</sub>) δ 7.66 (d, *J* = 7.2 Hz, 1H), 7.53 (d, *J* = 7.2 Hz, 1H), 7.35 (t, *J* = 7.2 Hz, 1H), 7.25 (t, *J* = 7.2 Hz, 1H), 6.24-6.28 (m, 1H),

4.70 (dd,  $J_1 = 4.0$  Hz,  $J_2 = 3.2$  Hz, 1H), 4.49 (dd,  $J_1 = 6.4$  Hz,  $J_2 = 12.4$  Hz, 1H), 4.33 (dd,  $J_1 = 6.4$  Hz,  $J_2 = 3.2$  Hz, 1H), 3.92-3.96 (m, 1H), 3.51-3.55 (m, 1H), 1.82-1.89 (m, 1H), 1.78 (s, 2H), 1.72-1.77 (m, 1H), 1.55-1.65 (m, 4H), 0.31 (s, 6H);  $^{13}\text{C}$  NMR (100 MHz,  $\text{CDCl}_3$ )  $\delta$  149.6, 143.2, 141.2, 132.1, 129.6, 127.4, 121.7, 119.7, 97.9, 65.1, 62.4, 30.8, 25.5, 19.6, 16.4, -1.7, -1.8; IR (neat)  $\text{cm}^{-1}$  3442brm, 3053m, 2947s, 2871s, 1727m, 1680m, 1441m, 1354m, 1253m, 1133m, 1028m, 828m; HRMS (ESI-TOF,  $m/z$ ) calcd for  $\text{C}_{17}\text{H}_{24}\text{NaO}_2\text{Si}$  ( $\text{M}+\text{Na}$ ) $^+$ : 311.1438, found 311.1441.

### Preparation of 2e

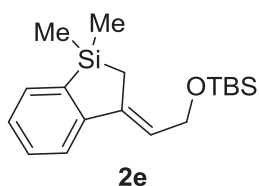

**2e**: Using the same procedure as that used for **2a** afforded **2e** as a colorless liquid (22 mg, 71% yield,  $Z:E = 80:20$ ). **Z-isomer**  $^1\text{H}$  NMR (400 MHz,  $\text{CDCl}_3$ )  $\delta$  7.64 (d,  $J = 7.2$  Hz, 1H), 7.53 (d,  $J = 7.2$  Hz, 1H), 7.34 (t,  $J = 7.2$  Hz, 1H), 7.24 (t,  $J = 7.2$  Hz, 1H), 6.20-6.23 (m, 1H), 4.46 (d,  $J = 6.4$  Hz, 2H), 1.69 (s, 2H), 0.93 (s, 9H), 0.31 (s, 6H), 0.11 (s, 6H);  $^{13}\text{C}$  NMR (100 MHz,  $\text{CDCl}_3$ )  $\delta$  149.8, 140.9, 140.2, 132.1, 129.6, 127.2, 123.6, 121.6, 61.9, 26.0, 18.4, 16.3, -1.8, -5.0; IR (neat)  $\text{cm}^{-1}$  2955s, 2927s, 2855s, 1734m, 1650m, 1464m, 1254s, 1086s, 837s; HRMS (ESI-TOF,  $m/z$ ) calcd for  $\text{C}_{18}\text{H}_{30}\text{NaOSi}_2$  ( $\text{M}+\text{Na}$ ) $^+$ : 341.1727, found 341.1728.

### Preparation of 2f

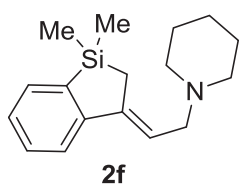

**2f**: Using the same procedure as that used for **2a** afforded **2f** as a colorless liquid (41mg, 76% yield,  $Z:E = 90:10$ ) as colorless liquid. **Z-isomer**  $^1\text{H}$  NMR (400 MHz,  $\text{CDCl}_3$ )  $\delta$  7.65 (d,  $J = 7.2$  Hz, 1H), 7.52 (d,  $J = 7.2$  Hz, 1H), 7.33 (t,  $J = 7.2$  Hz, 1H), 7.23 (t,  $J = 7.2$  Hz, 1H), 6.24 (tt,  $J_1 = 2.0$  Hz,  $J_2 = 6.8$  Hz, 1H), 3.22 (d,  $J = 6.8$  Hz, 2H), 2.47 (brs, 4H), 1.73 (s, 2H), 1.59-1.64 (m, 4H), 1.45-1.64 (m, 2H), 0.30 (s, 6H);  $^{13}\text{C}$  NMR (100 MHz,  $\text{CDCl}_3$ )  $\delta$  150.0, 142.2, 140.8, 132.0, 129.6, 127.0, 121.5, 120.6, 58.3, 54.6, 25.9, 24.3, 16.7 -1.8; IR (neat)  $\text{cm}^{-1}$  2933s, 2854s, 2795s, 1465m, 1250m, 1130m,

963m, 845s, 814s, 757s; HRMS (ESI-TOF, m/z) calcd for C<sub>17</sub>H<sub>26</sub>NSi (M+H)<sup>+</sup>: 272.1829, found 272.1823.

### Preparation of 2g

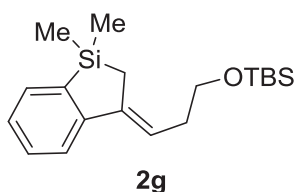

**2g**: Using the same procedure as that used for **2a** afforded **2g** as a colorless liquid (25 mg, 74% yield, *Z*:*E* = 94:6). **Z-isomer** <sup>1</sup>H NMR (400 MHz, CDCl<sub>3</sub>) δ 7.60 (d, *J* = 7.2 Hz, 1H), 7.52 (d, *J* = 7.2 Hz, 1H), 7.33 (t, *J* = 7.2 Hz, 1H), 7.22 (t, *J* = 7.2 Hz, 1H), 6.11-6.15 (m, 1H), 3.73 (t, *J* = 7.2 Hz, 2H), 2.51 (q, *J* = 7.2 Hz, 2H), 1.73 (s, 2H), 0.92 (s, 9H), 0.31 (s, 6H), 0.08 (s, 6H); <sup>13</sup>C NMR (100 MHz, CDCl<sub>3</sub>) δ 150.2, 141.4, 140.8, 132.1, 129.5, 126.7, 121.1, 120.1, 62.8, 33.5, 26.0, 18.4, 16.2, -1.8, -5.2; IR (neat) cm<sup>-1</sup> 2954s, 2897s, 2857s, 1466m, 1444m, 1252s, 1095s, 837s, 773s; HRMS (ESI-TOF, m/z) calcd for C<sub>19</sub>H<sub>32</sub>NaOSi<sub>2</sub> (M+Na)<sup>+</sup>: 355.1884, found 355.1881.

### Preparation of 2h

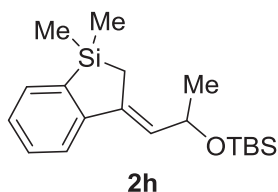

**2h**: Using the same procedure as that used for **2a** afforded **2h** as a colorless liquid (23 mg, 70% yield, *Z*:*E* = 88:12) as a colorless liquid. **Z-isomer** <sup>1</sup>H NMR (400 MHz, CDCl<sub>3</sub>) δ 7.62 (d, *J* = 7.2 Hz, 1H), 7.52 (d, *J* = 7.2 Hz, 1H), 7.34 (t, *J* = 7.2 Hz, 1H), 7.24 (t, *J* = 7.2 Hz, 1H), 6.08 (d, *J* = 8.0 Hz, 1H), 4.75 (qd, *J*<sub>1</sub> = 6.4 Hz, *J*<sub>2</sub> = 8.0 Hz, 1H), 1.74 (dd, *J*<sub>1</sub> = 1.6 Hz, *J*<sub>2</sub> = 16.4 Hz, 1H), 1.66 (dd, *J*<sub>1</sub> = 1.6 Hz, *J*<sub>2</sub> = 16.4 Hz, 1H), 1.28 (d, *J* = 6.4 Hz, 3H), 0.89 (s, 9H), 0.31 (s, 3H), 0.30 (s, 3H), 0.07 (s, 3H), 0.06 (s, 3H); <sup>13</sup>C NMR (100 MHz, CDCl<sub>3</sub>) δ 150.1, 140.8, 137.6, 132.1, 129.7, 129.2, 127.1, 121.6, 67.6, 25.9, 24.3, 18.3, 16.5, -1.8, -2.0, -4.4, -4.7; IR (neat) cm<sup>-1</sup> 2957s, 2929s, 2892s, 2857s, 1466m, 1443m, 1252s, 1079s, 1003s, 834s, 766s; HRMS (ESI-TOF, m/z) calcd for C<sub>19</sub>H<sub>32</sub>NaOSi<sub>2</sub> (M+Na)<sup>+</sup>: 355.1884, found 355.1879.

### Preparation of 2i

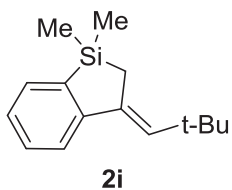

**2i:** Using the same procedure as that used for **2a** afforded **2i** as a colorless liquid (18.8 mg, 82% yield, *Z:E* ≥ 95:5) as colorless liquid. <sup>1</sup>H NMR (400 MHz, CDCl<sub>3</sub>) δ 7.57 (d, *J* = 7.2 Hz, 1H), 7.51 (d, *J* = 7.2 Hz, 1H), 7.31 (t, *J* = 7.2 Hz, 1H), 7.20 (t, *J* = 7.2 Hz, 1H), 6.12 (s, 1H), 1.88 (s, 2H), 1.23 (s, 9H), 0.30 (s, 6H); <sup>13</sup>C NMR (100 MHz, CDCl<sub>3</sub>) δ 139.6, 138.2, 134.8, 132.0, 129.5, 126.5, 121.3, 111.3, 32.7, 30.7, 18.0, -2.1; IR (neat) cm<sup>-1</sup> 3056w, 2958s, 2903m, 2867m, 1683m, 1540w, 1458m, 1443m, 1361m, 1252s, 1131s, 1017m, 842s, 810s, 759s; HRMS (ESI-TOF, *m/z*) calcd for C<sub>15</sub>H<sub>23</sub>Si (M+H)<sup>+</sup>: 231.1564, found 231.1561.

### Preparation of 2j

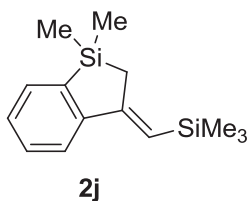

**2j:** Using the same procedure as that used for **2a** afforded **2j** as a colorless liquid (33 mg, 67%, *Z:E* = 91:9). <sup>1</sup>H NMR (600 MHz, CDCl<sub>3</sub>) δ 7.66 (d, *J* = 7.2 Hz, 1H), 7.53 (d, *J* = 7.2 Hz, 1H), 7.34 (t, *J* = 7.2 Hz, 1H), 7.25 (t, *J* = 7.2 Hz, 1H), 6.13 (s, 1H, *Z-isomer*), 5.64 (s, 1H, *E-isomer*), 2.14 (s, 2H, *E-isomer*), 1.90 (s, 2H, *Z-isomer*), 0.30 (s, 6H), 0.20 (s, 9H); *Z-isomer* <sup>13</sup>C NMR (150 MHz, CDCl<sub>3</sub>) δ 156.7, 151.1, 140.8, 132.0, 129.6, 127.6, 122.0, 121.5, 21.9, -0.1, -2.2; IR (neat) cm<sup>-1</sup> 3057m, 2955s, 2923m, 1681m, 1589m, 1558m, 1536m, 1415m, 1250s, 1131m, 1040s, 841brs, 761s; HRMS (ESI-TOF, *m/z*) calcd for C<sub>14</sub>H<sub>23</sub>Si<sub>2</sub> (M+H)<sup>+</sup>: 247.1333, found 247.1338.

### Preparation of 2k

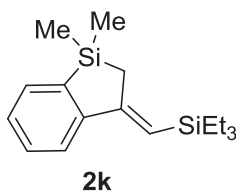

**2k:** Using the same procedure as that used for **2a** afforded **2k** as a colorless liquid (40 mg, 70% yield, *Z:E* = ≥95:5). <sup>1</sup>H NMR (600 MHz, CDCl<sub>3</sub>) δ 7.68 (d, *J* = 7.2 Hz, 1H), 7.53 (d, *J* = 7.2 Hz,



1H), 7.36 (t,  $J = 7.2$  Hz, 1H), 7.26 (t,  $J = 7.2$  Hz, 1H), 6.06 (s, 1H), 1.90 (s, 2H), 0.99 (t,  $J = 7.8$  Hz, 9H), 0.71 (q,  $J = 7.8$  Hz, 6H), 0.31 (s, 6H);  $^{13}\text{C}$  NMR (150 MHz,  $\text{CDCl}_3$ )  $\delta$  157.5, 151.4, 140.7, 132.0, 129.6, 127.5, 122.2, 118.1, 22.6, 7.7, 4.5, -2.2; IR (neat)  $\text{cm}^{-1}$  3057m, 2954s, 2909s, 2876s, 1681w, 1594m, 1578m, 1460m, 1443m, 1415m, 1250s, 1130s, 1011s, 837brs, 796s; HRMS (ESI-TOF,  $m/z$ ) calcd for  $\text{C}_{17}\text{H}_{28}\text{NaSi}_2$  ( $\text{M}+\text{Na}$ ) $^+$ : 311.1622, found 311.1626.

### Preparation of 3a

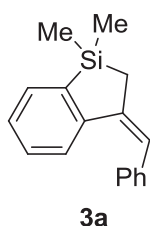

**3a**: Using the same procedure as that used for **2a** except for without DMSO afforded **3a** as a colorless liquid (106 mg, 85% yield,  $E:Z = 80:20$ ). *E*-isomer  $^1\text{H}$  NMR (400 MHz,  $\text{CDCl}_3$ )  $\delta$  7.54 (d,  $J = 7.2$  Hz, 1H), 7.14-7.26 (m, 7H), 7.03 (t,  $J = 7.2$  Hz, 1H), 6.63 (s, 1H), 2.02 (s, 1H), 0.36 (s, 6H);  $^{13}\text{C}$  NMR (150 MHz,  $\text{CDCl}_3$ )  $\delta$  148.2, 144.0, 141.7, 138.8, 132.0, 128.6, 128.2, 128.1, 127.0, 126.6, 126.2, 123.9, 27.9, -2.7; *Z*-isomer  $^1\text{H}$  NMR (400 MHz,  $\text{CDCl}_3$ )  $\delta$  7.77 (d,  $J = 7.2$  Hz, 1H), 7.59 (t,  $J = 7.2$  Hz, 1H), 7.58 (d,  $J = 7.2$  Hz, 1H), 7.37-7.44 (m, 4H), 7.30 (t,  $J = 7.2$  Hz, 1H), 7.24 (t,  $J = 7.2$  Hz, 1H), 7.09 (s, 1H), 2.13 (s, 2H), 0.33 (s, 6H);  $^{13}\text{C}$  NMR (100 MHz,  $\text{CDCl}_3$ )  $\delta$  151.3, 142.3, 140.7, 138.8, 132.2, 129.8, 129.2, 128.2, 127.4, 126.3, 123.5, 121.8, 19.9, -1.9; IR (neat)  $\text{cm}^{-1}$  3054s, 2955s, 1593m, 1492m, 1442m, 1249s, 1133s, 843s, 818s, 762s, 695m; HRMS (ESI-TOF,  $m/z$ ) calcd for  $\text{C}_{17}\text{H}_{18}\text{NaSi}$  ( $\text{M}+\text{Na}$ ) $^+$ : 273.1070, found 273.1059.

### Preparation of 3b

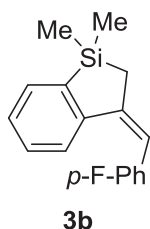

**3b**: Using the same procedure as that used for **3a** afforded **3b** as a colorless liquid (33 mg, 82%,  $E:Z = 80:20$ ). *E*-isomer  $^1\text{H}$  NMR (400 MHz,  $\text{CDCl}_3$ )  $\delta$  7.55 (d,  $J = 7.2$  Hz, 1H), 7.16-7.23 (m, 4H), 7.05 (t,  $J = 7.2$  Hz, 1H), 6.93 (t,  $J = 8.4$  Hz, 2H), 6.58 (s, 1H), 2.02 (s, 2H), 0.37 (s, 6H);  $^{13}\text{C}$  NMR

(100 MHz, CDCl<sub>3</sub>)  $\delta$  161.4 (d,  $J$  = 243.6 Hz), 148.0, 144.1, 142.0, 132.2, 130.2, 130.1, 128.3 (d,  $J$  = 3.4 Hz), 127.1, 126.5, 122.7, 115.1 (d,  $J$  = 21 Hz), 27.9, -2.7; IR (neat) cm<sup>-1</sup> 3050m, 2955m, 2926m, 1596m, 1504s, 1250s, 1224s, 1127s, 869s, 843s, 768s; HRMS (ESI-TOF,  $m/z$ ) calcd for C<sub>17</sub>H<sub>17</sub>FKSi (M+K)<sup>+</sup>: 307.0715, found 307.0713.

### Preparation of 3c

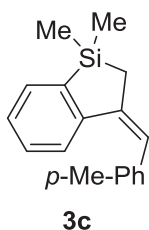

**3c:** Using the same procedure as that used for **3a** afforded **3c** as a colorless liquid (31 mg, 77%,  $E:Z$  = 75:25). *E-isomer* <sup>1</sup>H NMR (400 MHz, CDCl<sub>3</sub>)  $\delta$  7.55 (d,  $J$  = 7.2 Hz, 1H), 7.27 (d,  $J$  = 7.2 Hz, 1H), 7.18 (t,  $J$  = 7.2 Hz, 1H), 7.16 (d,  $J$  = 7.2 Hz, 2H), 7.03-7.06 (m, 3H), 6.06 (s, 1H), 2.33 (s, 3H), 2.02 (s, 2H), 0.37 (s, 6H); <sup>13</sup>C NMR (100 MHz, CDCl<sub>3</sub>)  $\delta$  148.4, 144.0, 141.0, 135.83, 135.81, 132.0, 128.9, 128.5, 128.2, 126.9, 126.6, 123.9, 27.9, 21.2, -2.7; IR (neat) cm<sup>-1</sup> 2953m, 2923m, 2859m, 1509m, 1442m, 1249s, 1126s, 867s, 841s, 770s, 724s; HRMS (ESI-TOF,  $m/z$ ) calcd for C<sub>18</sub>H<sub>20</sub>KSi (M+K)<sup>+</sup>: 303.0966, found 303.0962.

### Preparation of 3d and 3d'

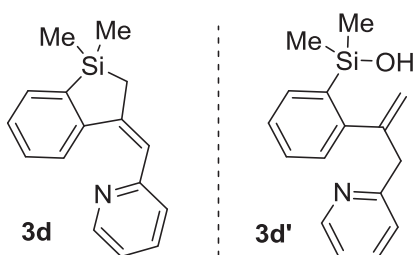

**3d:** Using the same procedure as that used for **3a** afforded **3d** as a pale yellow liquid (26 mg, 34%,  $E:Z \geq 95:5$ ) and **3d'** as a pale yellow liquid (27.2 mg, 31% yield). **3d:** <sup>1</sup>H NMR (400 MHz, CDCl<sub>3</sub>)  $\delta$  8.58 (brs, 1H), 7.70 (t,  $J$  = 7.2 Hz, 1H), 7.61 (d,  $J$  = 7.2 Hz, 1H), 7.38 (t,  $J$  = 7.2 Hz, 1H), 7.26-7.33 (m, 3H), 7.13-7.16 (m, 1H), 6.53 (s, 1H), 2.28 (s, 1H), 0.37 (s, 6H); <sup>13</sup>C NMR (100 MHz, CDCl<sub>3</sub>)  $\delta$  156.6, 151.4, 149.1, 146.4, 138.2, 136.5, 134.6, 128.9, 128.4, 126.7, 126.4, 123.9, 121.5, 20.9, 1.7; IR (neat) cm<sup>-1</sup> 2923m, 1636m, 1588m, 1469m, 1431m, 1399m, 1250m, 1129s, 1093s, 906s, 821m, 769s, 737s; HRMS (ESI-TOF,  $m/z$ ) calcd for C<sub>16</sub>H<sub>18</sub>NSi (M+H)<sup>+</sup>: 252.1203, found 252.1212. **3d':**

$^1\text{H}$  NMR (400 MHz,  $\text{CDCl}_3$ )  $\delta$  8.49 (d,  $J = 4.0$  Hz, 1H), 7.65 (dt,  $J_1 = 1.6$  Hz,  $J_2 = 7.2$  Hz, 1H), 7.52 (dd,  $J_1 = 1.6$  Hz,  $J_2 = 7.2$  Hz, 1H), 7.30 (dt,  $J_1 = 1.6$  Hz,  $J_2 = 7.2$  Hz, 1H), 7.23-7.26 (m, 2H), 7.14-7.16 (m, 2H), 5.13 (s, 1H), 4.80 (s, 1H), 3.91 (s, 2H), 0.40 (s, 6H);  $^{13}\text{C}$  NMR (100 MHz,  $\text{CDCl}_3$ )  $\delta$  158.7, 149.9, 149.3, 148.8, 138.7, 137.2, 134.4, 128.6, 127.1, 126.3, 124.5, 121.8, 117.2, 45.3, 2.2; IR (neat)  $\text{cm}^{-1}$  2957s, 2854s, 1473m, 1433s, 1252s, 1133brs, 897s, 828s, 780s, 741s; HRMS (ESI-TOF,  $m/z$ ) calcd for  $\text{C}_{16}\text{H}_{19}\text{NNaOSi}$  ( $\text{M}+\text{Na}$ ) $^+$ : 292.1128, found 292.1132.

### Preparation of 3e

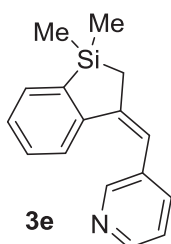

**3e**: Using the same procedure as that used for **3a** afforded **3e** as a pale yellow liquid (34 mg, 67%,  $E:Z = 77:23$ ). *E*-isomer  $^1\text{H}$  NMR (400 MHz,  $\text{CDCl}_3$ )  $\delta$  8.47 (s, 1H), 8.40 (d,  $J = 3.6$  Hz, 1H), 7.55 (t,  $J = 7.2$  Hz, 1H), 7.19 (t,  $J = 7.2$  Hz, 1H), 7.13-7.15 (m, 2H), 7.05 (t,  $J = 7.2$  Hz, 1H), 6.53 (s, 1H), 2.05 (s, 2H), 0.37 (s, 6H);  $^{13}\text{C}$  NMR (100 MHz,  $\text{CDCl}_3$ )  $\delta$  149.9, 147.5, 147.2, 144.6, 144.2, 135.8, 134.6, 132.4, 128.5, 127.5, 126.3, 123.0, 119.5, 28.4, -2.8; IR (neat)  $\text{cm}^{-1}$  3050m, 2926m, 1680m, 1583m, 1475m, 1424m, 1251s, 1128m, 1029m, 892m, 777m, 754m; HRMS (ESI-TOF,  $m/z$ ) calcd for  $\text{C}_{16}\text{H}_{18}\text{NSi}$  ( $\text{M}+\text{H}$ ) $^+$ : 252.1203, found 252.1208.

### Preparation of 3f

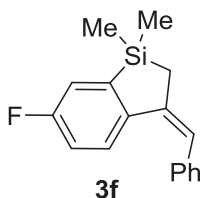

**3f**: Using the same procedure as that used for **3a** afforded **3f** as a colorless liquid (49 mg, 91%,  $E:Z = 77:23$ ). *E*-isomer  $^1\text{H}$  NMR (400 MHz,  $\text{CDCl}_3$ )  $\delta$  7.25-7.28 (m, 4H), 7.15-7.20 (m, 3H), 6.72 (dt,  $J_1 = 2.8$  Hz,  $J_2 = 8.0$  Hz, 1H), 6.60 (s, 1H), 2.05 (s, 2H), 0.38 (s, 6H);  $^{13}\text{C}$  NMR (100 MHz,  $\text{CDCl}_3$ )  $\delta$  161.9 (d,  $J = 248.5$  Hz), 146.9 (d,  $J = 4.8$  Hz), 143.9 (d,  $J = 2.7$  Hz), 140.5, 138.7, 128.6, 128.3, 128.2 (d,  $J = 7.2$  Hz), 126.3, 123.6, 117.8 (d,  $J = 19.2$  Hz), 115.6 (d,  $J = 22.5$  Hz), 28.0, -2.8; IR

(neat)  $\text{cm}^{-1}$  3021m, 2955m, 2926m, 1597m, 1567m, 1455s, 1256, 1207s, 1124m, 903m, 841s, 821s, 798s, 755s; HRMS (ESI-TOF,  $m/z$ ) calcd for  $\text{C}_{17}\text{H}_{17}\text{FKSi}$  ( $\text{M}+\text{K}$ ) $^+$ : 307.0715, found 307.0717.

### Preparation of 3g

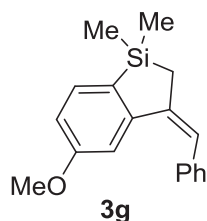

**3g**: Using the same procedure as that used for **3a** afforded **3g** as a colorless liquid (25 mg, 90%, *E:Z* = 80:20). *E-isomer*  $^1\text{H}$  NMR (400 MHz,  $\text{CDCl}_3$ )  $\delta$  7.42 (d,  $J = 8.0$  Hz, 1H), 7.24-7.27 (m, 4H), 7.15-7.18 (m, 1H), 6.75 (dd,  $J_1 = 2.0$  Hz,  $J_2 = 8.0$  Hz, 1H), 6.69 (s,  $J = 2.0$  Hz, 1H), 6.66 (s, 1H), 3.39 (s, 3H), 2.02 (s, 2H), 0.34 (s, 6H);  $^{13}\text{C}$  NMR (100 MHz,  $\text{CDCl}_3$ )  $\delta$  159.8, 150.0, 141.8, 138.9, 135.0, 132.9, 128.8, 128.2, 126.3, 124.2, 115.4, 110.6, 54.6, 27.7, -2.4; IR (neat)  $\text{cm}^{-1}$  2954s, 2924s, 2854s, 1590s, 1555s, 1465s, 1291m, 1232s, 1131m, 845s, 795s, 754s; HRMS (ESI-TOF,  $m/z$ ) calcd for  $\text{C}_{18}\text{H}_{21}\text{OSi}$  ( $\text{M}+\text{H}$ ) $^+$ : 281.1356, found 281.1356.

### Preparation of 3h

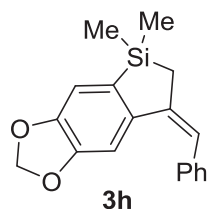

**3h**: Using the same procedure as that used for **3a** afforded **3h** as a colorless liquid (34 mg, 58%, *E:Z* = 80:20). *E-isomer*  $^1\text{H}$  NMR (400 MHz,  $\text{CDCl}_3$ )  $\delta$  7.24-7.25 (m, 4H), 7.16-7.18 (m, 1H), 6.92 (s, 1H), 6.64 (s, 1H), 6.53 (s, 1H), 5.86 (s, 2H), 2.00 (s, 2H), 0.33 (s, 6H);  $^{13}\text{C}$  NMR (100 MHz,  $\text{CDCl}_3$ )  $\delta$  148.3, 147.3, 143.0, 141.0, 138.7, 137.7, 128.6, 128.3, 126.2, 122.6, 110.3, 107.4, 100.8, 28.2, -2.5; IR (neat)  $\text{cm}^{-1}$  2954s, 2926s, 2894s, 1596m, 1499s, 1467s, 1346m, 1467s, 1346m, 1313m, 1246s, 1123s, 1040s, 941s, 845s, 756s; HRMS (ESI-TOF,  $m/z$ ) calcd for  $\text{C}_{18}\text{H}_{19}\text{O}_2\text{Si}$  ( $\text{M}+\text{H}$ ) $^+$ : 295.1149, found 295.1150.

## 2.3. Mechanistic Studies

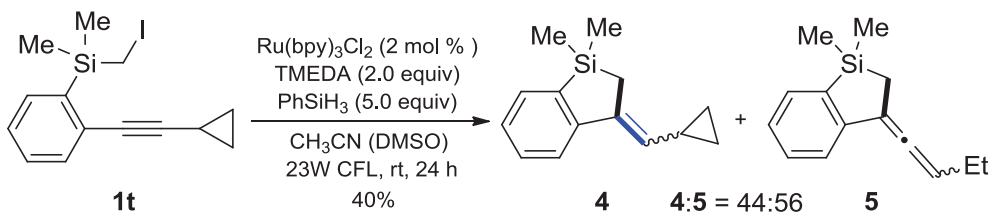

Using the same procedure as that used for **2a** afforded **4** (8 mg, 18%, *Z:E* = 3:1) as a colorless liquid and **5** (9 mg, 22%) as a colorless liquid. **4**:  $^1\text{H}$  NMR (400 MHz,  $\text{CDCl}_3$ )  $\delta$  7.51 (d,  $J = 7.2$  Hz, 2H), 7.29 (t,  $J = 7.2$  Hz, 1H), 7.17 (t,  $J = 7.2$  Hz, 1H), 5.52 (td,  $J_1 = 2.0$  Hz,  $J_2 = 9.6$  Hz, 1H), 1.85 (d,  $J = 2.0$  Hz, 2H), 1.68-1.73 (m, 1H), 0.85 (dt,  $J_1 = 4.4$  Hz,  $J_2 = 6.4$  Hz, 2H), 0.49 (dt,  $J_1 = 4.4$  Hz,  $J_2 = 6.4$  Hz, 2H), 0.32 (s, 6H);  $^{13}\text{C}$  NMR (100 MHz,  $\text{CDCl}_3$ )  $\delta$  150.3, 140.3, 138.1, 132.2, 129.5, 128.6, 126.3, 120.7, 16.2, 12.0, 7.4, -1.6; **5**:  $^1\text{H}$  NMR (400 MHz,  $\text{CDCl}_3$ )  $\delta$  7.52 (d,  $J = 7.2$  Hz, 1H), 7.44 (d,  $J = 7.2$  Hz, 1H), 7.32 (t,  $J = 7.2$  Hz, 1H), 7.18 (t,  $J = 7.2$  Hz, 1H), 5.52-5.56 (m, 1H), 2.13 (qd,  $J_1 = 7.6$  Hz,  $J_2 = 7.2$  Hz, 2H), 1.86 (d,  $J = 3.2$  Hz, 1H), 1.85 (d,  $J = 3.2$  Hz, 1H), 1.06 (t,  $J = 7.6$  Hz, 3H), 0.33 (s, 3H), 0.32 (s, 3H);  $^{13}\text{C}$  NMR (100 MHz,  $\text{CDCl}_3$ )  $\delta$  201.9, 148.2, 131.9, 130.2, 129.7, 126.3, 123.7, 106.3, 95.7, 22.5, 17.2, 13.6, -1.59, -1.64. IR (neat)  $\text{cm}^{-1}$  2961s, 2926s, 2854s, 1681s, 1558m, 1516m, 1252m, 830m, 795m; HRMS (ESI-TOF,  $m/z$ ) calcd for  $\text{C}_{14}\text{H}_{18}\text{KSi}$  ( $\text{M}+\text{K}$ ) $^+$ : 253.0809, found 253.0818.

## 2.4. Functionalization of **3a**

### Preparation of **8**

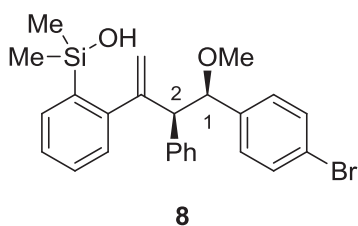

To a solution of **3a** (25 mg, 0.1 mmol) and 4-bromobenzaldehyde dimethyl acetal (25  $\mu\text{L}$ , 0.15 mmol) in anhyd.  $\text{CH}_2\text{Cl}_2$  (2.0 mL) under argon atmosphere,  $\text{SnCl}_4$  (0.15 mL of 1.0 M solution in  $\text{CH}_2\text{Cl}_2$ , 0.15 mmol) was added dropwise at  $-78$   $^\circ\text{C}$ . The mixture was then stirred overnight before quenching with sat.  $\text{NaHCO}_3$  (3 mL). The aqueous layer was extracted with  $\text{Et}_2\text{O}$  ( $3 \times 5$  mL). The combined organic layer was dried over anhydrous  $\text{Na}_2\text{SO}_4$  and concentrated in vacuo. Purification of the crude residue via silica gel flash column chromatography (gradient eluent: petroleum ether/ $\text{EtOAc}$  = 100:1 $\rightarrow$ 50:1) afforded **8** (32.7 mg, 70% yield, *syn/anti* = 90 : 10) as colorless

viscous liquid. **Major isomer**<sup>1</sup> <sup>1</sup>H NMR (400 MHz, CDCl<sub>3</sub>) δ 7.57 (dd,  $J_1 = 1.2$  Hz,  $J_2 = 7.2$  Hz, 1H), 7.38 (dd,  $J_1 = 1.2$  Hz,  $J_2 = 7.2$  Hz, 1H), 7.32 (dd,  $J_1 = 1.2$  Hz,  $J_2 = 7.2$  Hz, 1H), 7.16-7.25 (m, 8H), 6.70 (d,  $J = 8.0$  Hz, 1H), 5.26 (s, 1H), 5.18 (s, 1H), 4.55 (d,  $J = 3.6$  Hz, 1H), 4.06 (brs, 1H), 3.94 (s, 1H), 3.03 (s, 3H), 0.46 (s, 3H), 0.41 (s, 3H); <sup>13</sup>C NMR (100 MHz, CDCl<sub>3</sub>) δ 150.9, 148.1, 138.5, 138.1, 136.5, 135.1, 131.2, 130.9, 128.9, 128.6, 127.8, 127.4, 126.9, 126.6, 121.1, 119.3, 83.7, 60.0, 57.0, 3.5, 2.2; **Minor isomer**<sup>1</sup> <sup>1</sup>H NMR (400 MHz, CDCl<sub>3</sub>) δ 7.46 (d,  $J = 7.6$  Hz, 1H), 7.25 (d,  $J = 7.6$  Hz, 2H), 7.15 (t,  $J = 7.6$  Hz, 1H), 7.09-7.10 (m, 3H), 6.94 (t,  $J = 7.6$  Hz, 1H), 6.84-6.86 (m, 4H), 6.18 (d,  $J = 7.6$  Hz, 2H), 5.64 (s, 1H), 5.56 (s, 1H), 5.35 (s, 1H), 4.64 (d,  $J = 10.4$  Hz, 1H), 3.80 (d,  $J = 10.4$  Hz, 1H), 3.30 (s, 3H), 0.52 (s, 3H), 0.41 (s, 3H); IR (neat) cm<sup>-1</sup> 3419brm, 2956m, 2920m, 2851m, 1487m, 1254m, 1095m, 826m, 782m; HRMS (ESI-TOF, m/z) calcd for C<sub>25</sub>H<sub>27</sub>BrNaO<sub>2</sub>Si (M+Na)<sup>+</sup>: 489.0856, found 489.0859.

### Preparation of 9

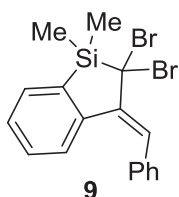

To a solution of **3a** (25 mg, 0.1 mmol) in anhyd. CCl<sub>4</sub> (1.0 mL) were added NBS (36 mg, 0.2 mmol) and benzoyl peroxide (1.0 mg, 3 μmol) under argon atmosphere. The mixture was then degassed via the freeze-pump-thaw method and backfilled with argon. After stirring at 80 °C overnight, the reaction mixture was cooled to 25 °C, filtered through a cotton plug, and concentrated in vacuo. Purification of the crude residue via silica gel flash column chromatography (eluent: petroleum ether) afforded **9** as an off-white solid (35 mg, 85% yield, m.p. 128-130 °C). <sup>1</sup>H NMR (400 MHz, CDCl<sub>3</sub>) δ 7.52-7.53 (m, 3H), 7.26-7.33 (m, 3H), 7.14-7.21 (m, 3H), 6.95 (s, 1H), 0.45 (s, 3H), 0.44 (s, 3H); <sup>13</sup>C NMR (100 MHz, CDCl<sub>3</sub>) δ 151.4, 144.8, 137.3, 136.9, 132.0, 129.5, 128.4, 127.8, 126.6, 125.5, 49.6, -4.8, -5.2; IR (neat) cm<sup>-1</sup> 2958m, 2924m, 1585m, 1490m, 1440s, 1400s, 1247s,

1. The *syn*-stereochemistry was assigned based on the results from previous studies, which provided structurally similar products to ours. Generally, the *anti*-isomer possesses a larger coupling constant ( $J_{H1-H2} = 9-10$  Hz) than the *syn*-isomer ( $J_{H1-H2} = 4-8$  Hz). Thus, in our case, the major isomer containing a smaller coupling constant ( $J_{H1-H2} = 3.6$  Hz) was assigned as *syn*-stereochemistry, and the minor isomer containing a larger coupling constant ( $J_{H1-H2} = 10.4$  Hz) was assigned as *anti*-stereochemistry. For the related references, see: (a) K. H. Kim, H. S. Lee, S. H. Kim, K. Y. Lee, J.-E. Lee, J. N. Kim, *Bull. Korean Chem. Soc.* 2009, **30**, 1012; (b) H.-J. Gais, L. R. Reddy, G. S. Babu, G. Raabe, *J. Am. Chem. Soc.*, 2004, **126**, 4859; (c) M. Bandini, P. G. Cozzi, P. M., A. Umani-Ronchi, *Angew. Chem. Int. Ed.* 2004, **43**, 84; (d) M. Song, J. Montgomery, *Tetrahedron*, 2005, **61**, 11440.

1091s, 937s, 845s, 785s; HRMS (ESI-TOF, m/z) calcd for C<sub>17</sub>H<sub>16</sub>Br<sub>2</sub>NaSi (M+Na)<sup>+</sup>: 428.9280, found 428.9275.

### Preparation of 10

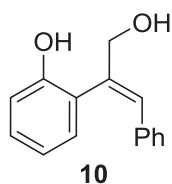

To a solution of *t*-BuOK (67.3 mg, 0.6 mmol) in anhyd. THF (0.7 mL) was added *tert*-butyl hydroperoxide (0.11 mL of 5.5 M in decane over MS, 0.6 mmol) at 0 °C under argon atmosphere. After stirring for 10 min, a solution of **3a** (25 mg, 0.1 mmol) in anhyd. THF (0.4 mL) and TBAF (0.6 mL of 1.0 M solution in THF, 0.6 mmol) were added sequentially. The mixture was stirred overnight at 70 °C before quenching with sat aq Na<sub>2</sub>S<sub>2</sub>O<sub>3</sub> (3 mL) and sat aq NH<sub>4</sub>Cl (5 mL). The aqueous layer was extracted with Et<sub>2</sub>O (3 × 5 mL). The combined organic layers were dried over anhydrous Na<sub>2</sub>SO<sub>4</sub> and concentrated in vacuo. Purification of the crude residue via silica gel flash column chromatography (gradient eluent: petroleum ether/EtOAc = 20:1→5:1) afforded **10** as a white powder (13 mg, 56% yield, m.p. 108-110 °C). <sup>1</sup>H NMR (400 MHz, CDCl<sub>3</sub>) δ 7.23 (t, *J* = 7.2 Hz, 1H), 7.13-7.15 (m, 3H), 6.95-7.03 (m, 4H), 6.85-6.88 (m, 2H), 4.45 (s, 2H); <sup>13</sup>C NMR (100 MHz, CDCl<sub>3</sub>) δ 153.7, 136.2, 135.5, 132.2, 129.8, 129.5, 128.9, 128.2, 127.7, 125.5, 120.8, 116.7, 69.8; IR (neat) cm<sup>-1</sup> 3426s, 3084s, 1450s, 1398s, 1365s, 1238s, 1071s, 749s; HRMS (ESI-TOF, m/z) calcd for C<sub>15</sub>H<sub>14</sub>NaO<sub>2</sub> (M+Na)<sup>+</sup>: 249.0886, found 249.0889.

### Preparation of 11

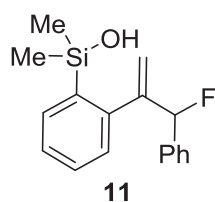

To a solution of **3a** (25 mg, 0.1 mmol) in anhyd. MeCN (2.0 mL) was added Selectfluor (53 mg, 0.15 mmol) under argon atmosphere at -20 °C. The mixture was stirred for 3 h before quenching with water (3 mL). The aqueous layer was extracted with Et<sub>2</sub>O (3 × 5 mL). The combined organic layers were dried over anhydrous Na<sub>2</sub>SO<sub>4</sub> and concentrated in vacuo. Purification of the crude

residue via silica gel flash column chromatography (gradient eluent: petroleum ether/EtOAc = 50:1→20:1) afforded **11** as a colorless viscous liquid (20 mg, 70% yield). <sup>1</sup>H NMR (400 MHz, CDCl<sub>3</sub>) δ 7.60 (d, *J* = 7.2 Hz, 1H), 7.26-7.36 (m, 6H), 7.21 (t, *J* = 7.2 Hz, 1H), 6.74 (d, *J* = 7.2 Hz, 1H), 6.17 (d, *J* = 45.6 Hz, 1H), 5.57 (s, 1H), 5.26 (s, 1H), 2.17 (brs, 1H), 0.43 (s, 3H), 0.41 (s, 3H); <sup>13</sup>C NMR (100 MHz, CDCl<sub>3</sub>) δ 150.1 (d, *J* = 20.7 Hz), 144.2, 138.2, 137.4, 134.4, 129.2, 128.8, 128.7(d, *J* = 2.4 Hz), 128.4, 126.9, 126.8 (d, *J* = 1.1 Hz), 116.8 (d, *J* = 8.0 Hz), 95.7 (d, *J* = 175.1 Hz), 2.1, 1.8; IR (neat) cm<sup>-1</sup> 3336brs, 3053s, 2959s, 2926s, 1585m, 1456m, 1255s, 1117s, 1003s, 854s, 831s, 780s, 737s; HRMS (ESI-TOF, m/z) calcd for C<sub>17</sub>H<sub>19</sub>FNaOSi (M+Na)<sup>+</sup>: 309.1081, found 309.1093.



### 3. Computational details

All calculations were performed using Gaussian 09 programs package.<sup>1</sup> Geometries were fully optimized at the UB3LYP/6-31+G\* level in CH<sub>3</sub>CN solvent and characterized by frequency analyses. The wave function stability was tested at the same theoretical level.<sup>2</sup> The self-consistent reaction field (SCRF) method with PCM<sup>3</sup> solvation model was used to evaluate solvent effect on reaction. The intrinsic reaction coordinate (IRC) path was traced in order to check the potential energy profile connecting each transition state to the two associated minima.<sup>4</sup> The Gibbs free energies ( $G_{298K}$ ) obtained in solvent and corrected by zero-point vibrational effect were used in the discussion.

#### References:

- (1) Gaussian 09 (Revision D. 01), Frisch, M. J.; Trucks, G. W.; Schlegel, H. B.; Scuseria, G. E.; Robb, M. A.; Cheeseman, J. R.; Scalmani, G.; Barone, V.; Mennucci, B.; Petersson, G. A.; Nakatsuji, H.; Caricato, M.; Li, X.; Hratchian, H. P.; Izmaylov, A. F.; Bloino, J.; Zheng, G.; Sonnenberg, J. L.; Hada, M.; Ehara, M.; Toyota, K.; Fukuda, R.; Hasegawa, J.; Ishida, M.; Nakajima, T.; Honda, Y.; Kitao, O.; Nakai, H.; Vreven, T.; Montgomery, J. A., Jr.; Peralta, J. E.; Ogliaro, F.; Bearpark, M.; Heyd, J. J.; Brothers, E.; Kudin, K. N.; Staroverov, V. N.; Kobayashi, R.; Normand, J.; Raghavachari, K.; Rendell, A.; Burant, J. C.; Iyengar, S. S.; Tomasi, J.; Cossi, M.; Rega, N.; Millam, J. M.; Klene, M.; Knox, J. E.; Cross, J. B.; Bakken, V.; Adamo, C.; Jaramillo, J.; Gomperts, R.; Stratmann, R. E.; Yazyev, O.; Austin, A. J.; Cammi, R.; Pomelli, C.; Ochterski, J. W.; Martin, R. L.; Morokuma, K.; Zakrzewski, V. G.; Voth, G. A.; Salvador, P.; Dannenberg, J. J.; Dapprich, S.; Daniels, A. D.; Farkas, O.; Foresman, J. B.; Ortiz, J. V.; Cioslowski, J.; Fox, D. J., Gaussian, Inc., Wallingford CT, 2013.
- (2) (a) R. Seeger and J. A. Pople, *J. Chem. Phys.* **1977**, *66*, 3045. (b) R. Bauernschmitt and R. Ahlrichs, *J. Chem. Phys.* **1996**, *104*, 9047.
- (3) (a) M. Cossi, G. Scalmani, N. Rega, V. Barone, *J. Chem. Phys.* **2002**, *117*, 43. (b) J. Tomasi, B. Mennucci, R. Cammi, *Chem. Rev.* **2005**, *105*, 2999.
- (4) (a) K. J. Fukui, *Phys. Chem.* **1970**, *74*, 4161. (b) K. Fukui, *Acc. Chem. Res.* **1981**, *14*, 363. (c) C. Gonzalez, H. B. Schlegel, *J. Chem. Phys.* **1989**, *90*, 2154.

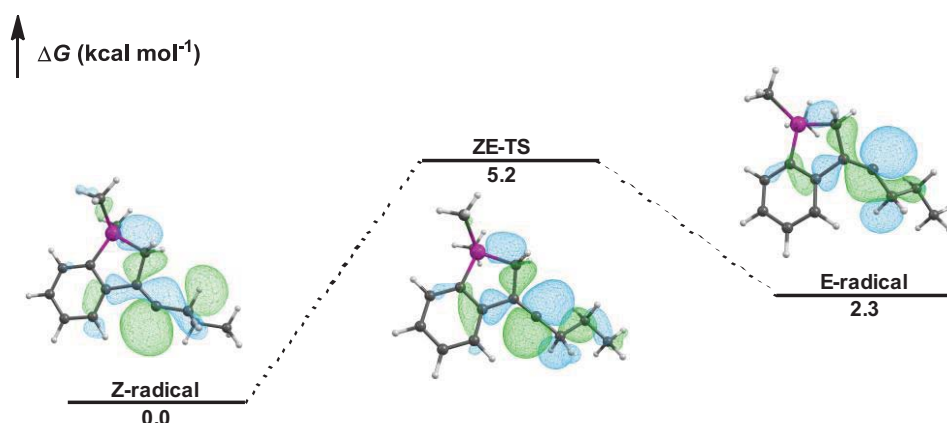

Figure 1. Energy profile for the isomerization between Z-radical and E-radical. Realative Gibbs free energies ( $\Delta G$ , kcal mol<sup>-1</sup>) obtained in CH<sub>3</sub>CN solvent at the UB3LYP/6-31+G\*(PCM, CH<sub>3</sub>CN) level are given in parentheses.

## XYZ Coordinates and Energies of all the species studied in this work.

---

### Z-radical

Zero-point correction= 0.28671 (a.u.)

Thermal correction to Gibbs Free Energy= 0.24003 (a.u.)

Sum of electronic and zero-point Energies= -834.12328 (a.u.)

Sum of electronic and thermal Free Energies= -834.16995 (a.u.)

Number of imaginary frequency: 0

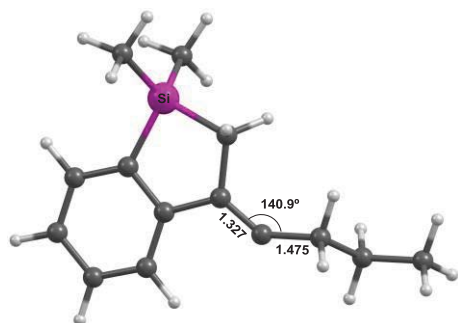

34

|    |           |           |           |
|----|-----------|-----------|-----------|
| C  | -2.683020 | -0.733373 | -0.676377 |
| C  | -2.789503 | 0.639256  | -0.949233 |
| C  | -1.698922 | 1.479145  | -0.706918 |
| C  | -0.497143 | 0.967661  | -0.191096 |
| C  | -1.498202 | -1.261451 | -0.165444 |
| C  | -0.397837 | -0.419121 | 0.079701  |
| H  | -3.717140 | 1.045499  | -1.345274 |
| H  | -3.530592 | -1.389569 | -0.860378 |
| H  | -1.790125 | 2.542505  | -0.922323 |
| Si | 1.129710  | 1.828138  | 0.218932  |
| H  | -1.422015 | -2.324973 | 0.049300  |
| C  | 0.907983  | -0.896570 | 0.617360  |
| C  | 1.888747  | 0.246792  | 0.974333  |
| C  | 0.949940  | 3.244487  | 1.457844  |
| C  | 2.046810  | 2.430338  | -1.322467 |
| H  | 1.933198  | 3.630441  | 1.756652  |
| H  | 0.425078  | 2.916229  | 2.363194  |
| H  | 0.384369  | 4.078420  | 1.022805  |
| H  | 2.184044  | 1.616605  | -2.045039 |
| H  | 1.491502  | 3.234868  | -1.821465 |
| H  | 3.038052  | 2.821867  | -1.059652 |
| H  | 2.899462  | 0.027787  | 0.611886  |
| H  | 1.960468  | 0.345879  | 2.066506  |
| C  | 1.223895  | -2.175670 | 0.774784  |
| C  | 2.335419  | -3.032446 | 1.227620  |
| C  | 2.879111  | -3.985583 | 0.139847  |
| C  | 4.024668  | -4.864329 | 0.652966  |

|   |          |           |           |
|---|----------|-----------|-----------|
| H | 2.011964 | -3.631648 | 2.092959  |
| H | 3.160101 | -2.392948 | 1.592522  |
| H | 2.058271 | -4.617665 | -0.223296 |
| H | 3.219586 | -3.390386 | -0.717596 |
| H | 4.393462 | -5.530323 | -0.136084 |
| H | 3.698494 | -5.489872 | 1.493854  |
| H | 4.869372 | -4.254490 | 0.998278  |

### E-radical

Zero-point correction= 0.28678 (a.u.)

Thermal correction to Gibbs Free Energy= 0.24081 (a.u.)

Sum of electronic and zero-point Energies= -834.12028 (a.u.)

Sum of electronic and thermal Free Energies= -834.16625 (a.u.)

Number of imaginary frequency: 0

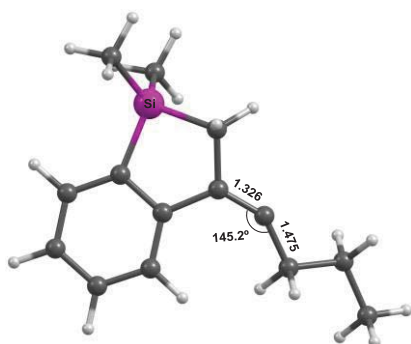

34

|    |           |           |           |
|----|-----------|-----------|-----------|
| C  | -2.875594 | -0.624869 | -0.562087 |
| C  | -2.908261 | 0.748968  | -0.835040 |
| C  | -1.773469 | 1.531180  | -0.593022 |
| C  | -0.599952 | 0.956222  | -0.084404 |
| C  | -1.716031 | -1.219321 | -0.058724 |
| C  | -0.569991 | -0.438764 | 0.173852  |
| H  | -3.815276 | 1.205600  | -1.223779 |
| H  | -3.760547 | -1.233212 | -0.733266 |
| H  | -1.811936 | 2.599406  | -0.799976 |
| Si | 1.066264  | 1.726837  | 0.360584  |
| H  | -1.715131 | -2.281164 | 0.170029  |
| C  | 0.734242  | -0.969837 | 0.688383  |
| C  | 1.636922  | 0.139022  | 1.253184  |
| C  | 0.933220  | 3.236613  | 1.488389  |
| C  | 2.105902  | 2.138167  | -1.165513 |
| H  | 0.458910  | 4.078176  | 0.967537  |
| H  | 1.926970  | 3.567940  | 1.816404  |
| H  | 0.338156  | 3.014077  | 2.382335  |
| H  | 2.219333  | 1.262235  | -1.815961 |
| H  | 1.640046  | 2.938001  | -1.755285 |

|   |          |           |           |
|---|----------|-----------|-----------|
| H | 3.108758 | 2.477104  | -0.875428 |
| H | 2.696737 | -0.112162 | 1.144501  |
| H | 1.440814 | 0.258509  | 2.329746  |
| C | 1.122789 | -2.235041 | 0.613269  |
| C | 0.769246 | -3.584824 | 0.133795  |
| C | 1.987643 | -4.436213 | -0.291021 |
| C | 1.580961 | -5.827675 | -0.786684 |
| H | 0.082179 | -3.500395 | -0.727347 |
| H | 0.216543 | -4.127718 | 0.916833  |
| H | 2.537167 | -3.904313 | -1.078709 |
| H | 2.672381 | -4.528375 | 0.561923  |
| H | 2.459883 | -6.412234 | -1.083009 |
| H | 0.914710 | -5.760185 | -1.656322 |
| H | 1.053514 | -6.388853 | -0.004591 |

### Z-E-TS

Zero-point correction= 0.28559 (a.u.)

Thermal correction to Gibbs Free Energy= 0.23994 (a.u.)

Sum of electronic and zero-point Energies= -834.11600 (a.u.)

Sum of electronic and thermal Free Energies= -834.16164 (a.u.)

Number of imaginary frequency: 1

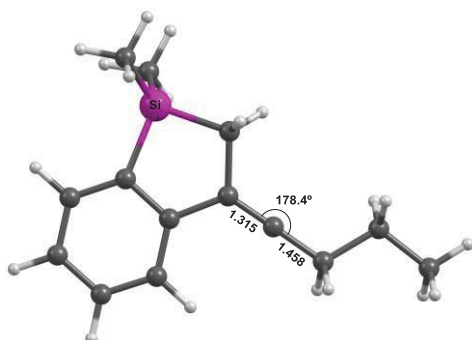

34

|    |           |           |           |
|----|-----------|-----------|-----------|
| C  | -3.155328 | -0.120740 | -0.776788 |
| C  | -3.052221 | 1.278525  | -0.762029 |
| C  | -1.834207 | 1.879321  | -0.430080 |
| C  | -0.711226 | 1.100150  | -0.107531 |
| C  | -2.050627 | -0.912301 | -0.462858 |
| C  | -0.824470 | -0.311092 | -0.127428 |
| H  | -3.917160 | 1.891025  | -1.005254 |
| H  | -4.102308 | -0.591847 | -1.030160 |
| H  | -1.764212 | 2.965951  | -0.422322 |
| Si | 1.046383  | 1.604886  | 0.356585  |
| H  | -2.136972 | -1.996840 | -0.469993 |
| C  | 0.415386  | -1.086744 | 0.210842  |
| C  | 1.548892  | -0.187518 | 0.774915  |

|   |          |           |           |
|---|----------|-----------|-----------|
| C | 1.131706 | 2.785667  | 1.830888  |
| C | 2.002146 | 2.330284  | -1.107057 |
| H | 0.593838 | 2.379714  | 2.696278  |
| H | 0.687601 | 3.758516  | 1.583604  |
| H | 2.172558 | 2.962993  | 2.131119  |
| H | 1.990533 | 1.647131  | -1.965174 |
| H | 1.564755 | 3.284049  | -1.429216 |
| H | 3.049482 | 2.517503  | -0.836883 |
| H | 2.523040 | -0.490653 | 0.376597  |
| H | 1.600090 | -0.311207 | 1.866246  |
| C | 0.542146 | -2.385129 | 0.041725  |
| C | 0.677574 | -3.818751 | -0.185481 |
| C | 2.120904 | -4.377126 | -0.044828 |
| C | 2.180699 | -5.885490 | -0.306600 |
| H | 0.308091 | -4.072146 | -1.194158 |
| H | 0.024215 | -4.362639 | 0.515661  |
| H | 2.776010 | -3.846961 | -0.747770 |
| H | 2.490687 | -4.154277 | 0.964000  |
| H | 3.205757 | -6.261495 | -0.207303 |
| H | 1.831990 | -6.126101 | -1.319116 |
| H | 1.551246 | -6.436756 | 0.403767  |

Lin-7-39-3 H1  
CDC13 400MHZ

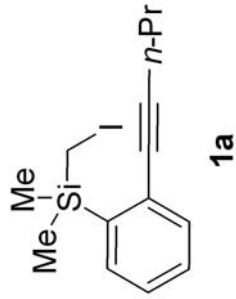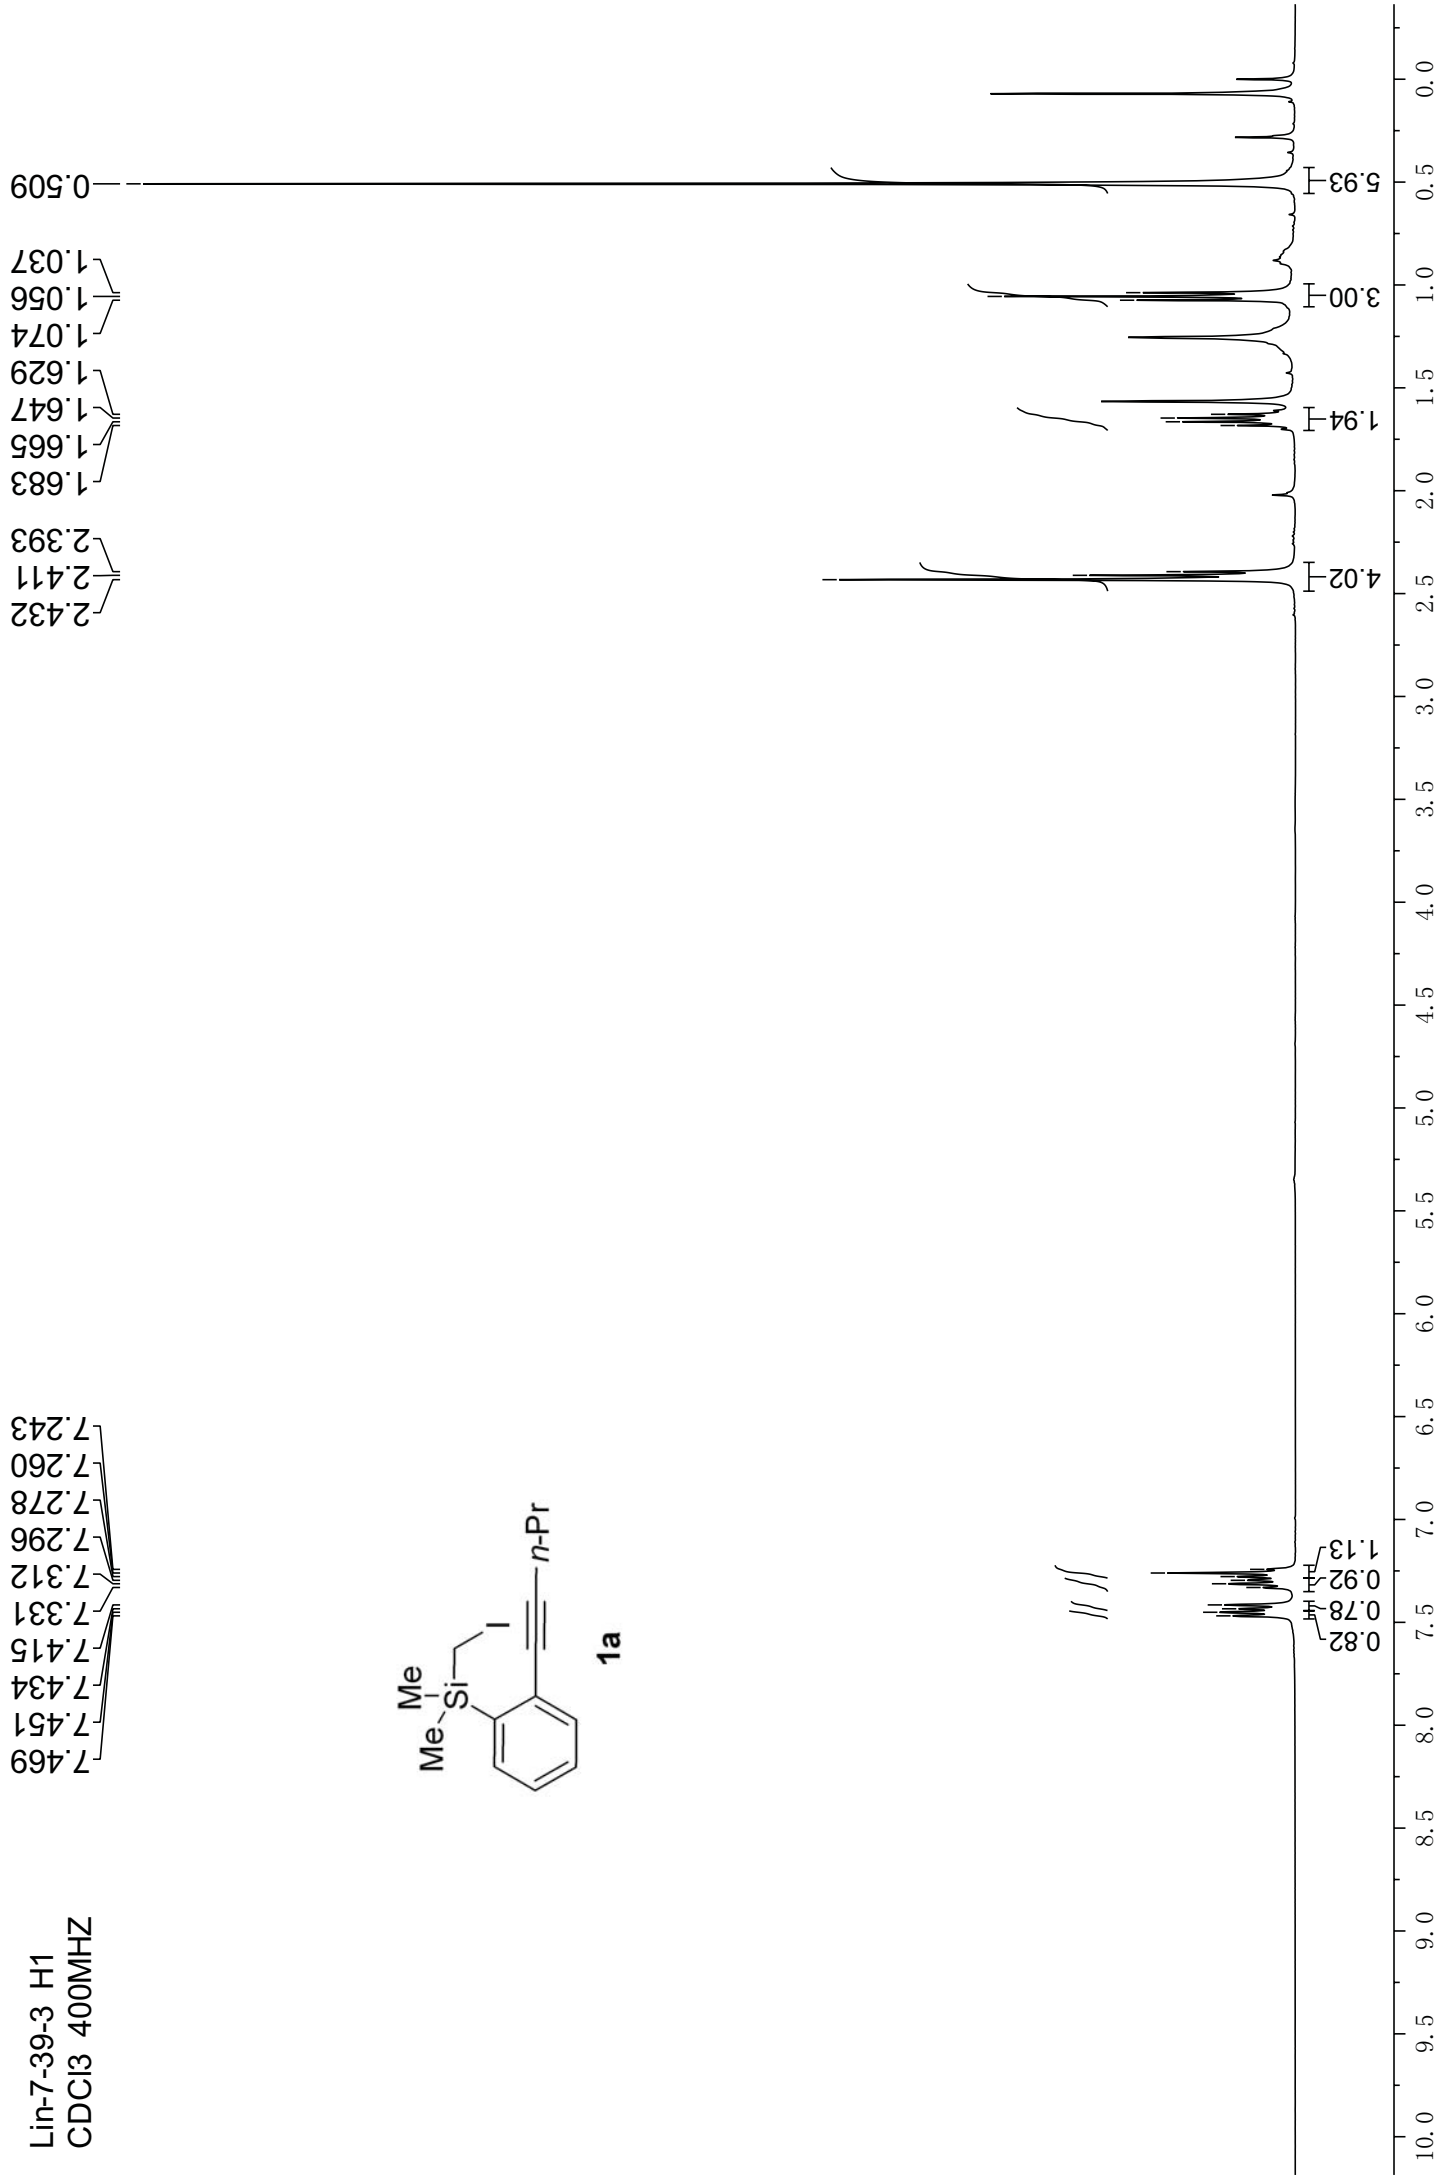

Lin-7-39-3 C13  
CDC13 100MHZ

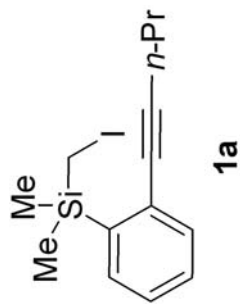

22.060  
21.563  
-13.777  
-2.635  
-13.212

81.917  
77.313  
77.000  
76.675

93.683

138.334  
134.213  
132.547  
129.330  
129.219  
126.854

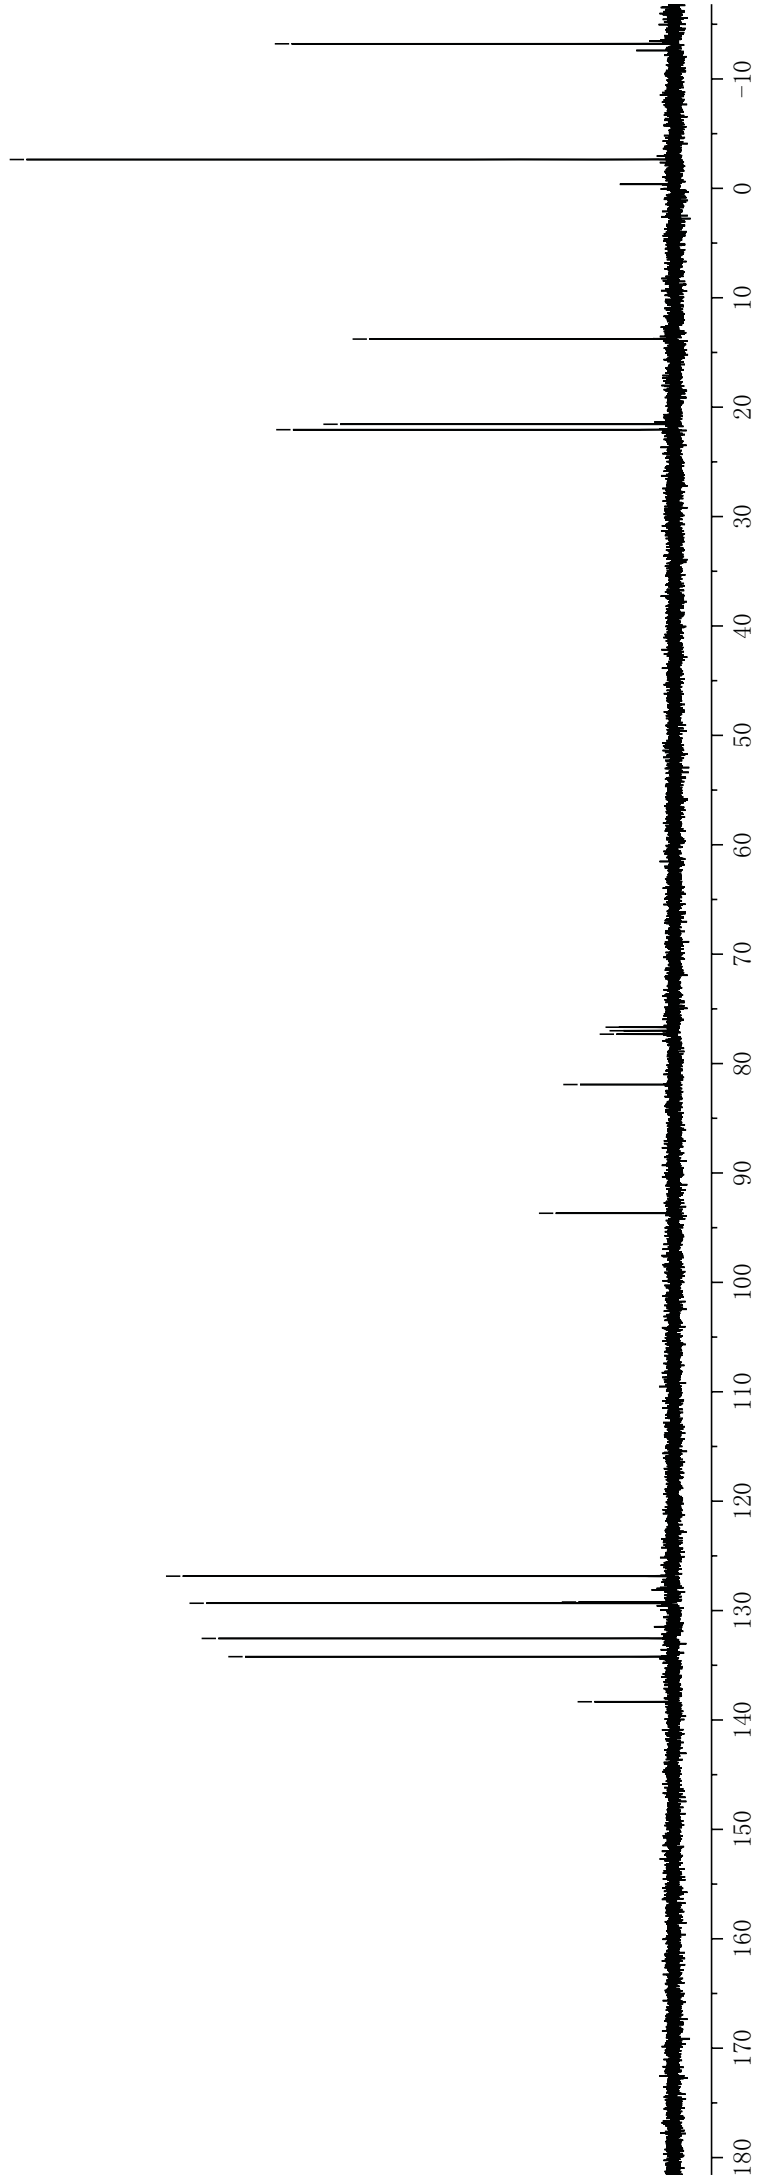

Lin-7-54-2 H1  
CDCI3 400MHZ

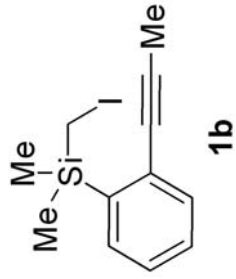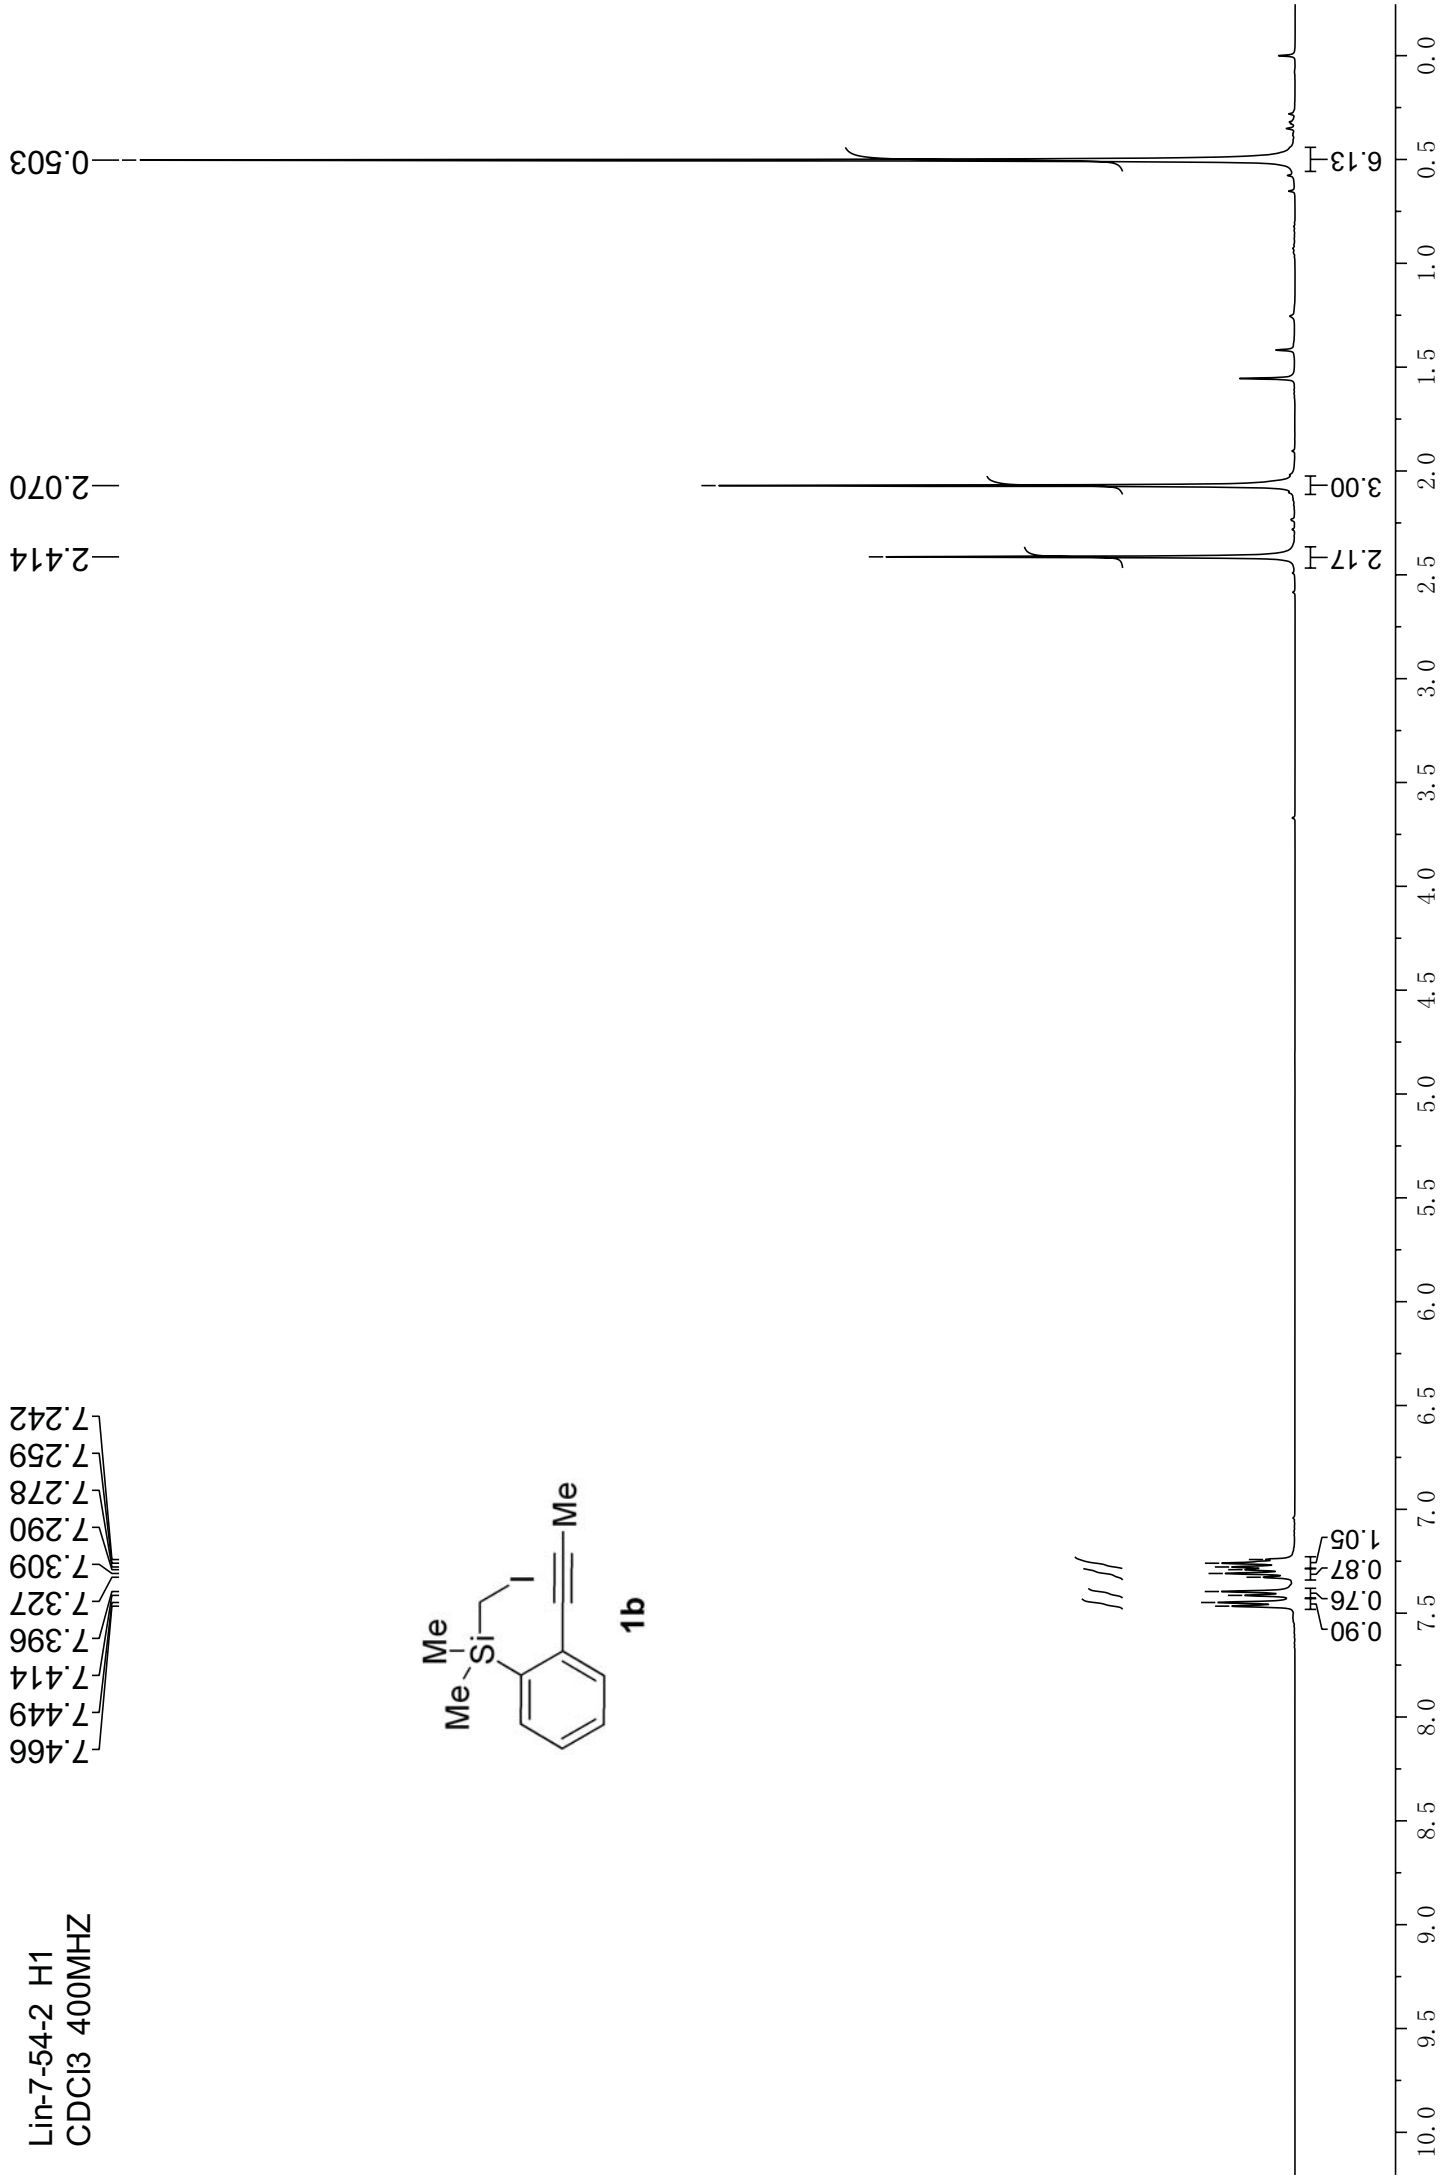



Lin-7-54-2 C13  
CDCI3 150MHZ

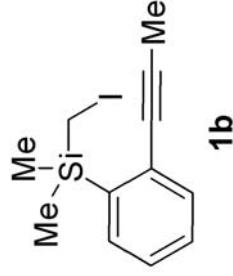

89.263  
81.124  
77.212  
77.000  
76.788  
4.403  
-2.615  
-13.339

138.530  
134.255  
132.298  
129.373  
129.179  
126.911

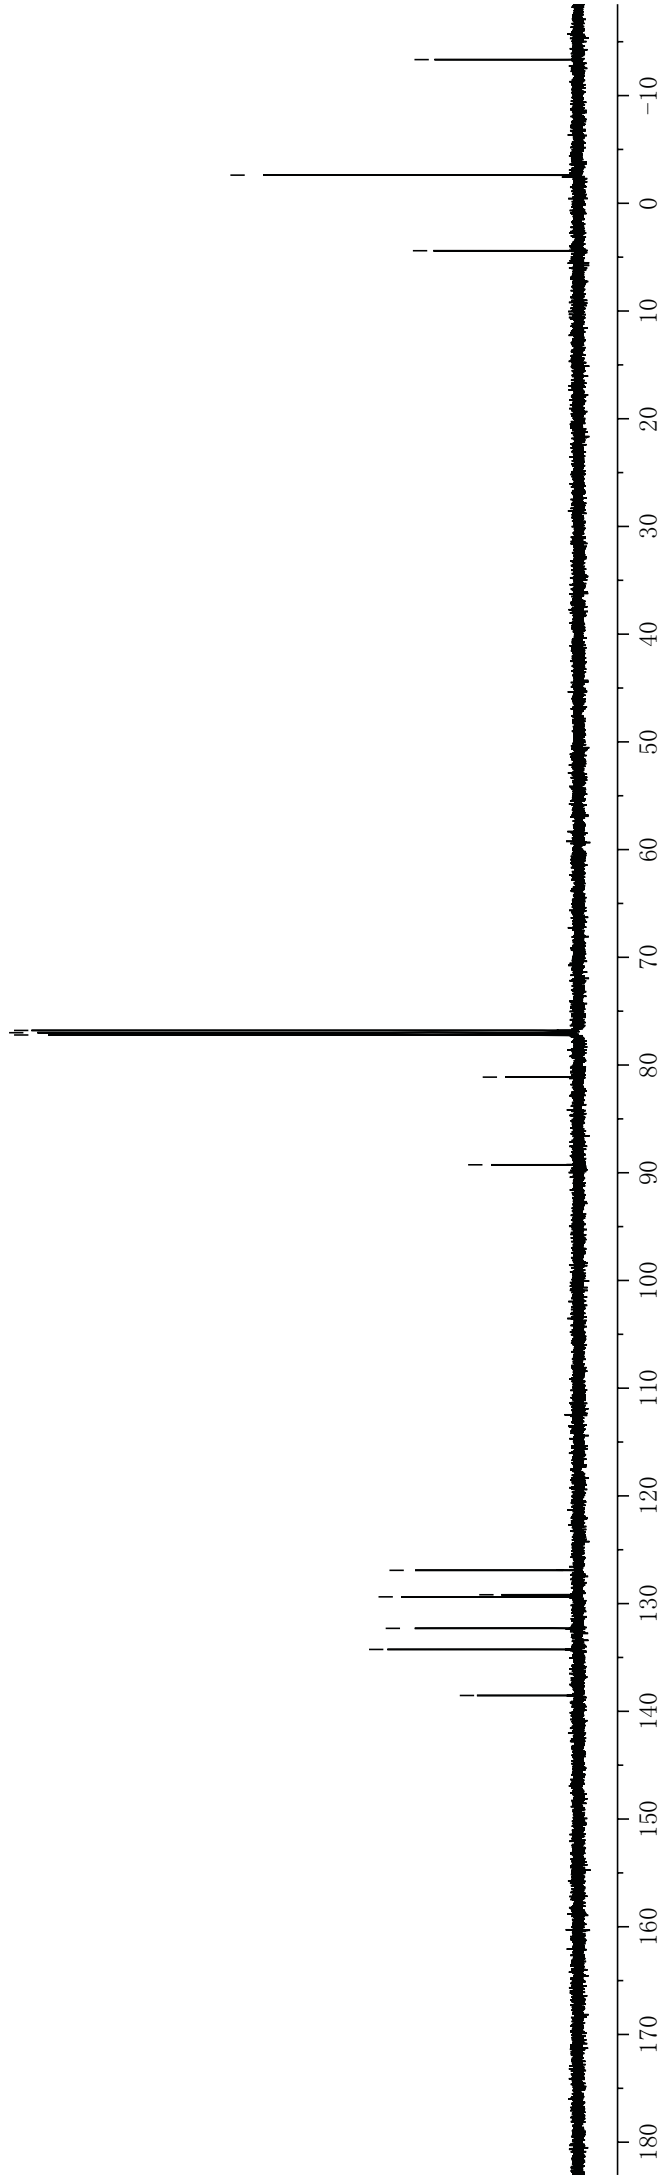

Lin-7-91-4b H1  
CDCI3 400MHZ

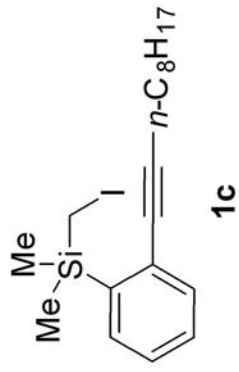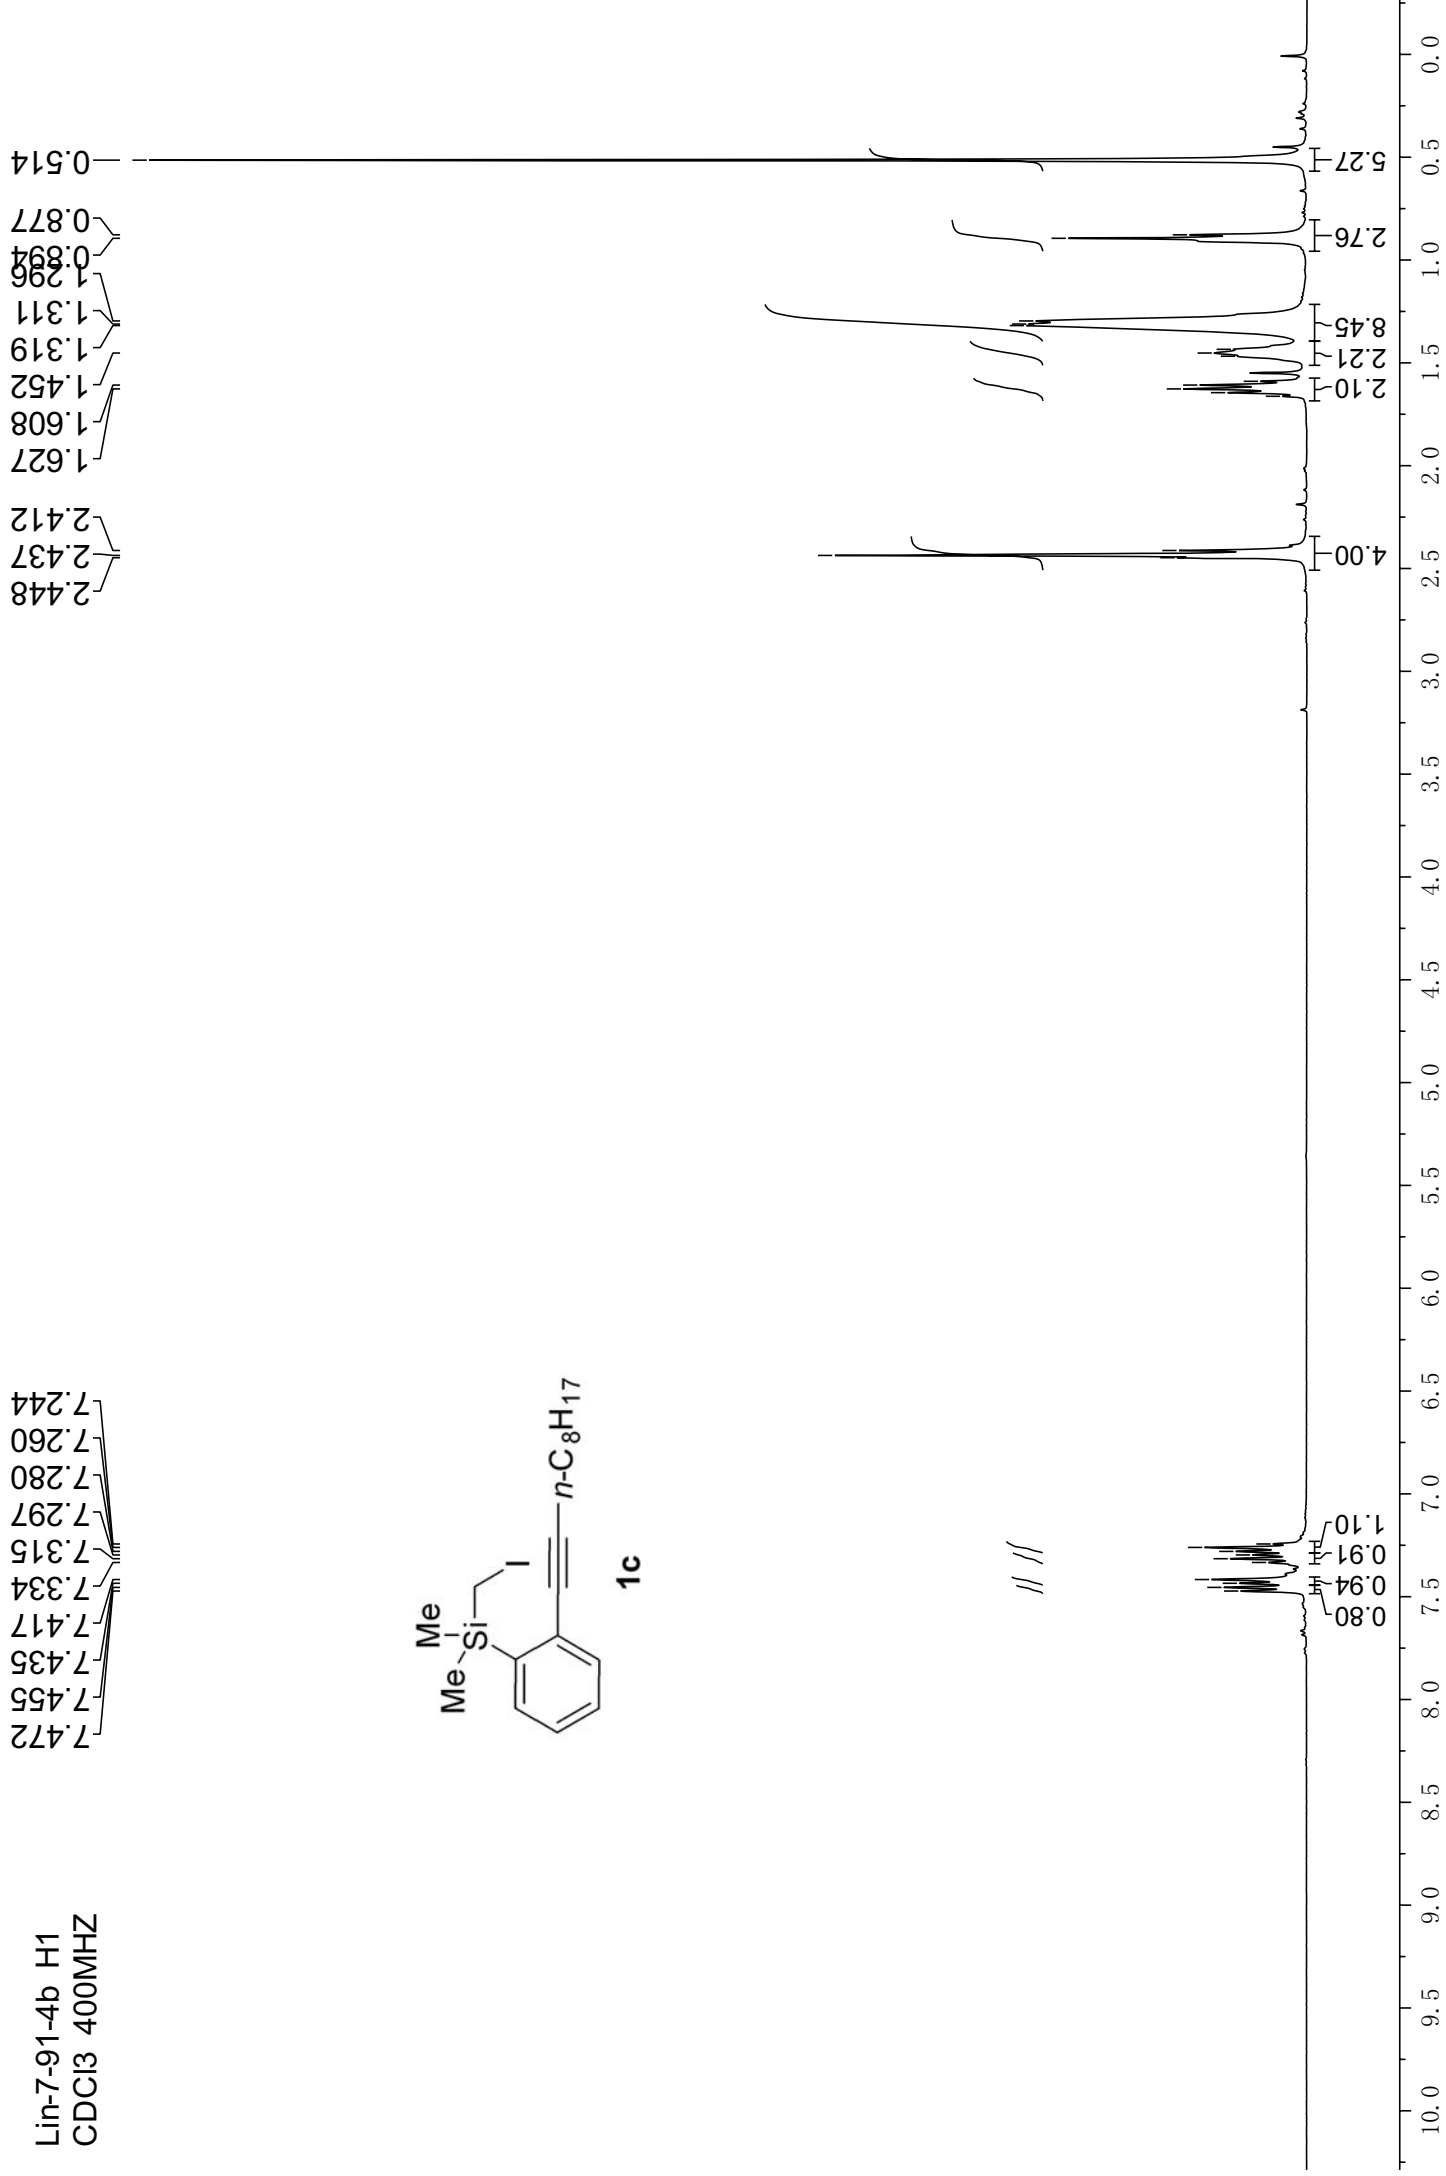

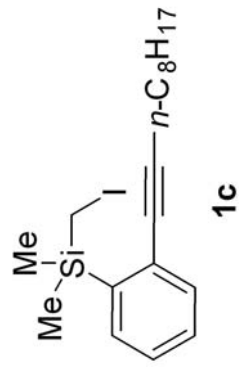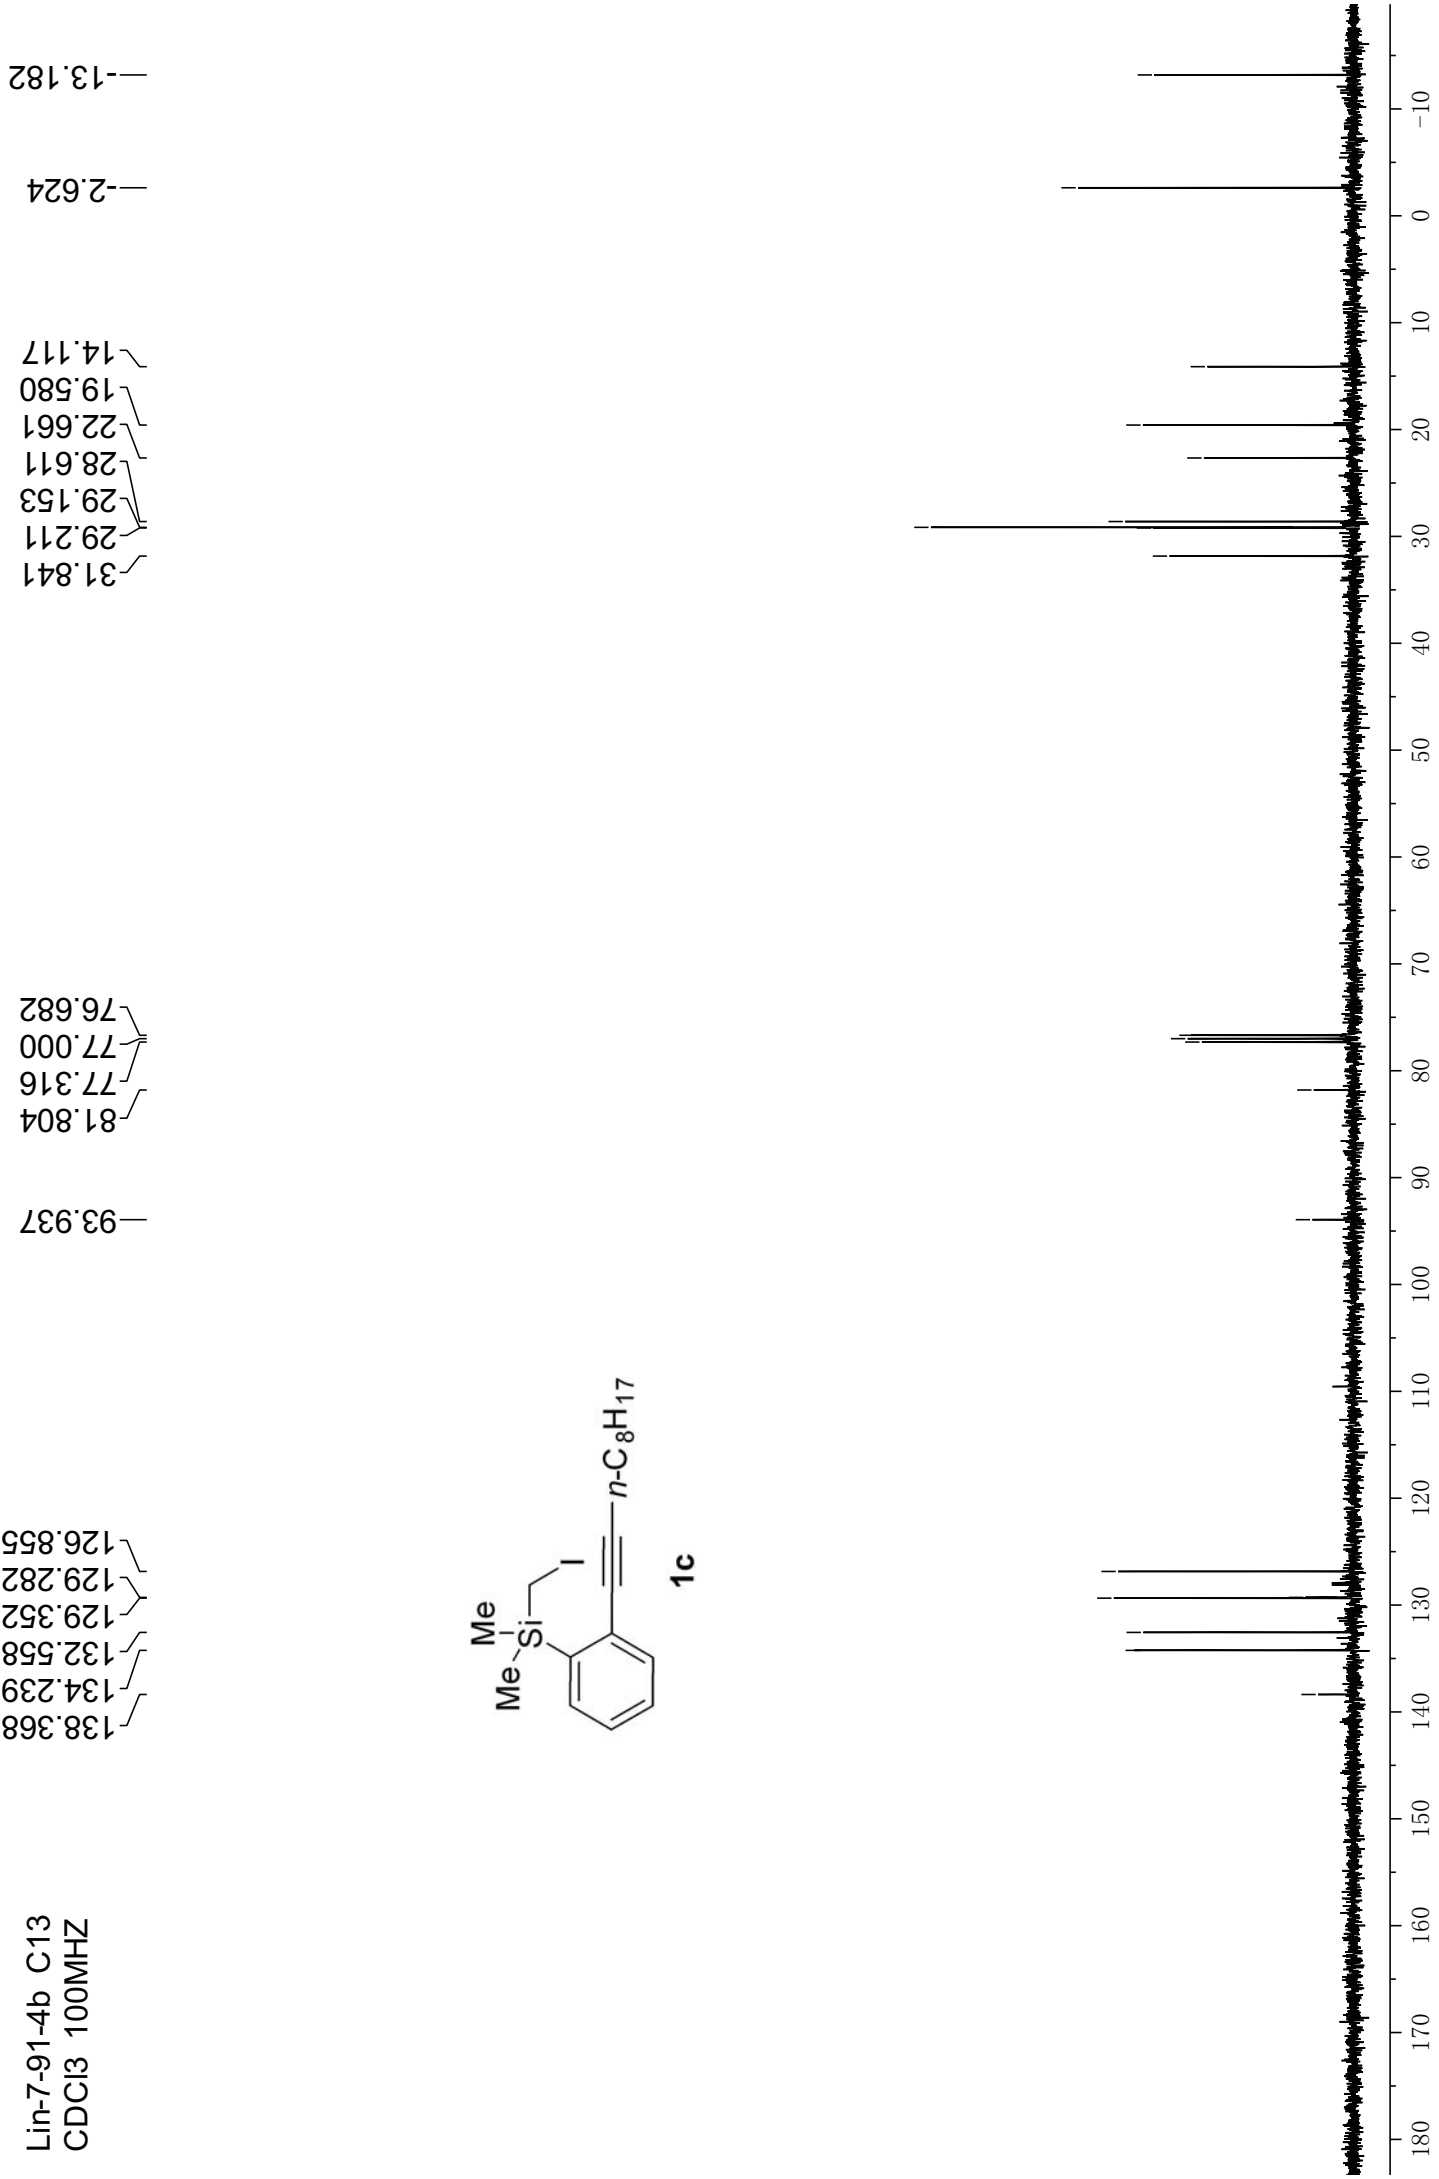

Lin-7-91-4b C13  
 CDCI3 100MHZ

Lin-7-93-3 H1  
CDCI3 400MHZ

4.887  
4.879  
4.871  
4.560  
4.520  
4.507  
4.488  
4.449  
3.921  
3.914  
3.892  
3.871  
3.864  
3.589  
3.577  
3.561  
2.439  
1.773  
1.696  
1.685  
1.648  
1.624  
1.611  
1.597  
1.578  
1.566  
0.321

7.499  
7.484  
7.478  
7.467  
7.341  
7.337  
7.324  
7.311  
7.260

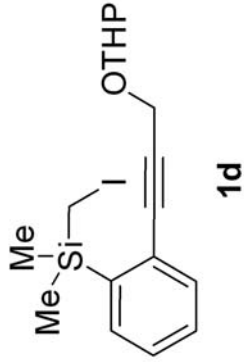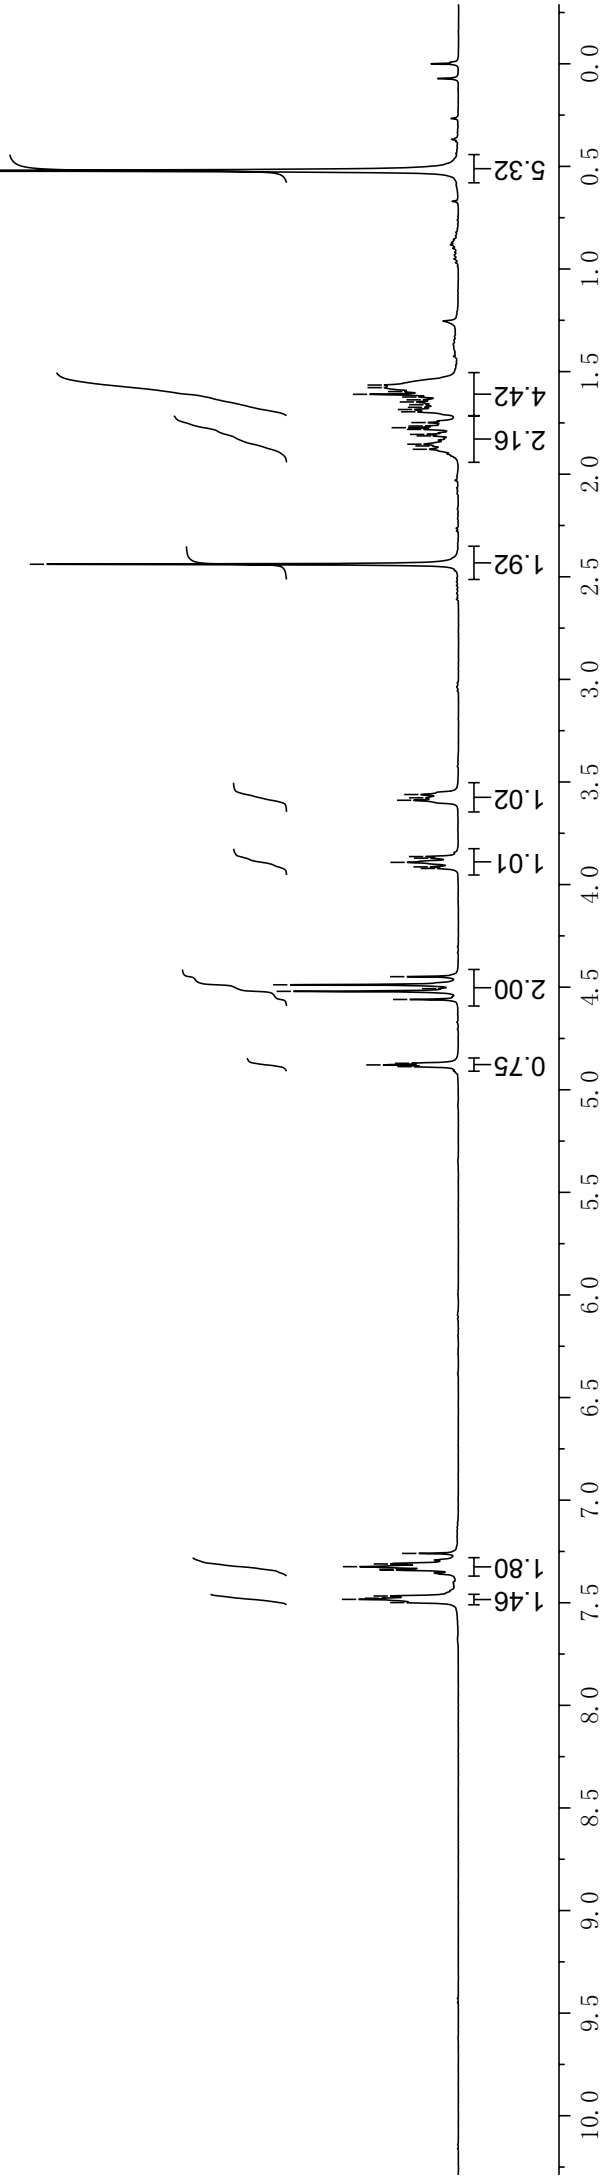

Lin-7-41-1a C13  
CDCI3 150MHZ

139.144  
134.385  
132.822  
129.380  
127.815  
127.744

97.018

88.553

86.897

77.211  
77.000  
76.788

62.080

54.695

30.326

25.375

19.092

1.023

1.004

2.564

13.460

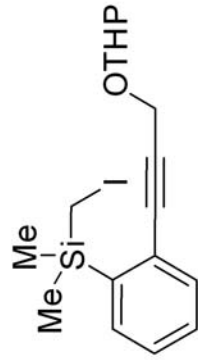

1d

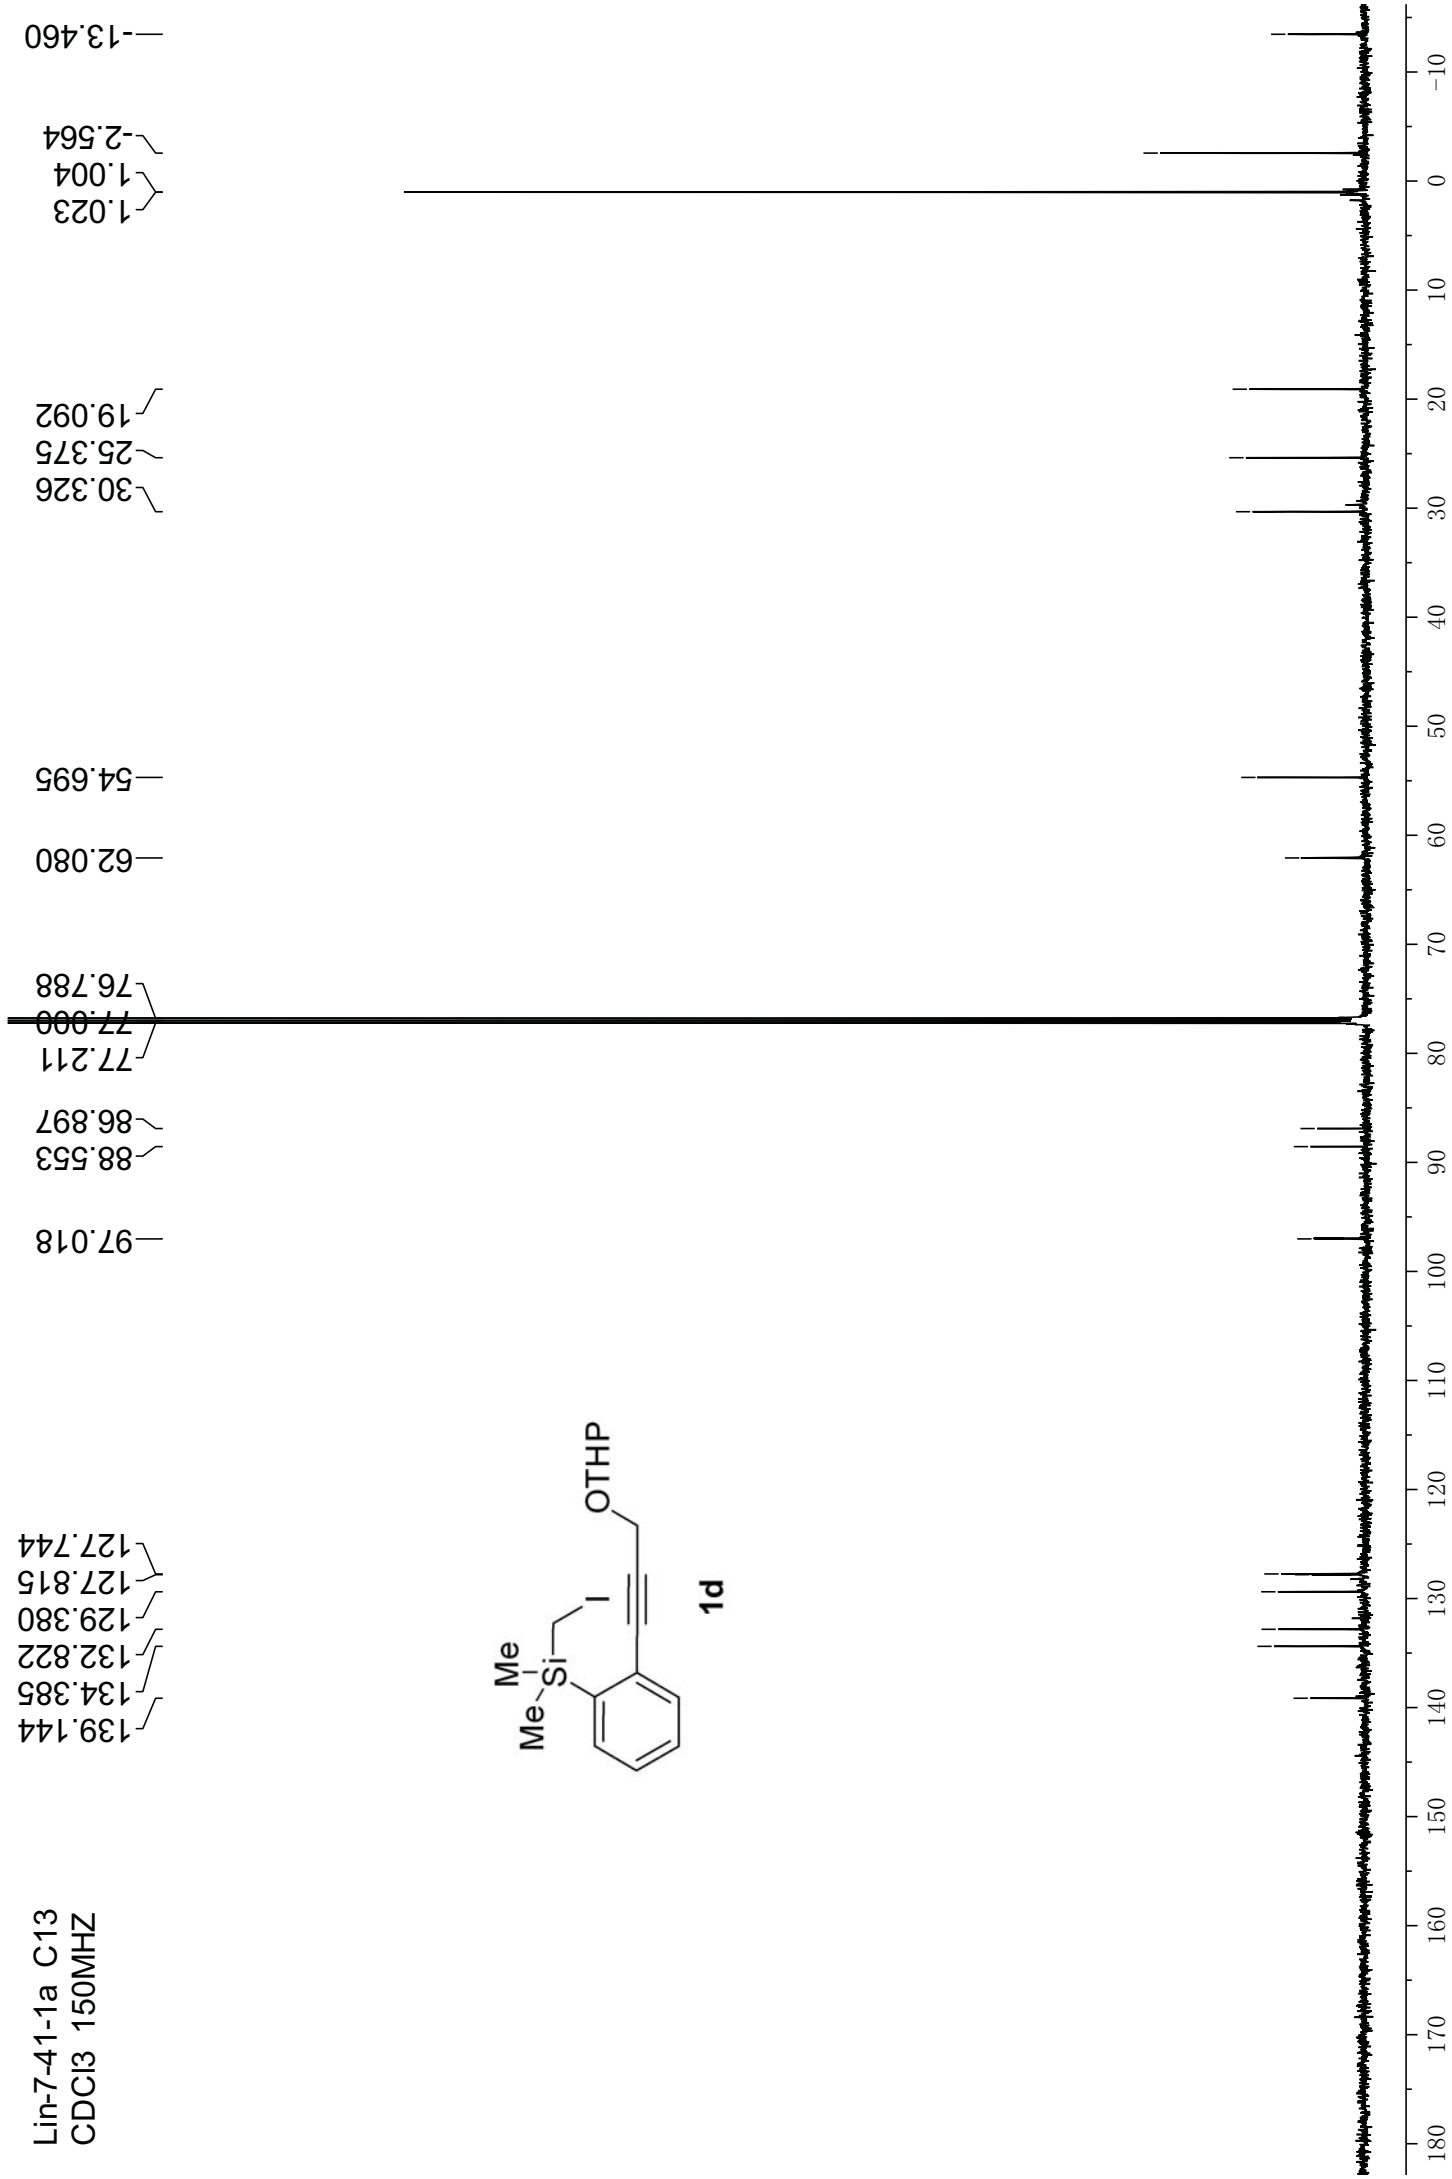

Lin-7-53-5a H1  
CDCI3 600MHZ

7.494  
7.482  
7.467  
7.454  
7.350  
7.337  
7.325  
7.318  
7.306  
7.294  
7.260  
4.553  
2.435  
10.65  
6.17  
6.77  
0.523  
0.166

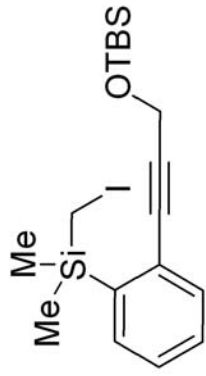

1e

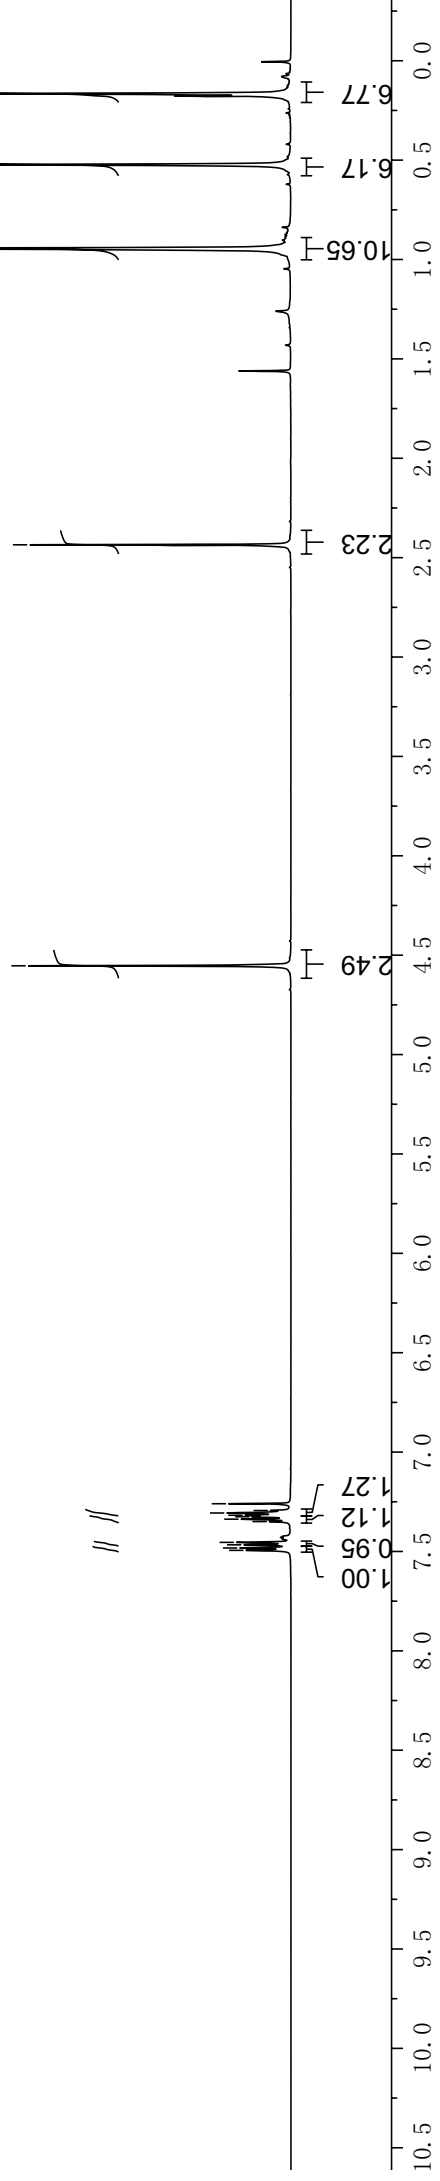

Lin-7-53-5a C13  
CDCI3 150MHZ

13.413  
5.136  
2.485  
18.338  
25.855  
52.214  
76.788  
77.000  
77.212  
85.783  
90.982

127.587  
128.041  
129.359  
132.637  
134.369  
138.978

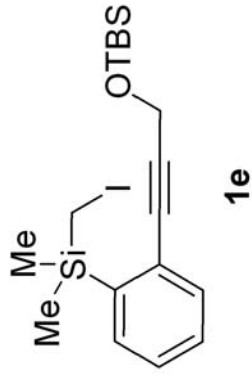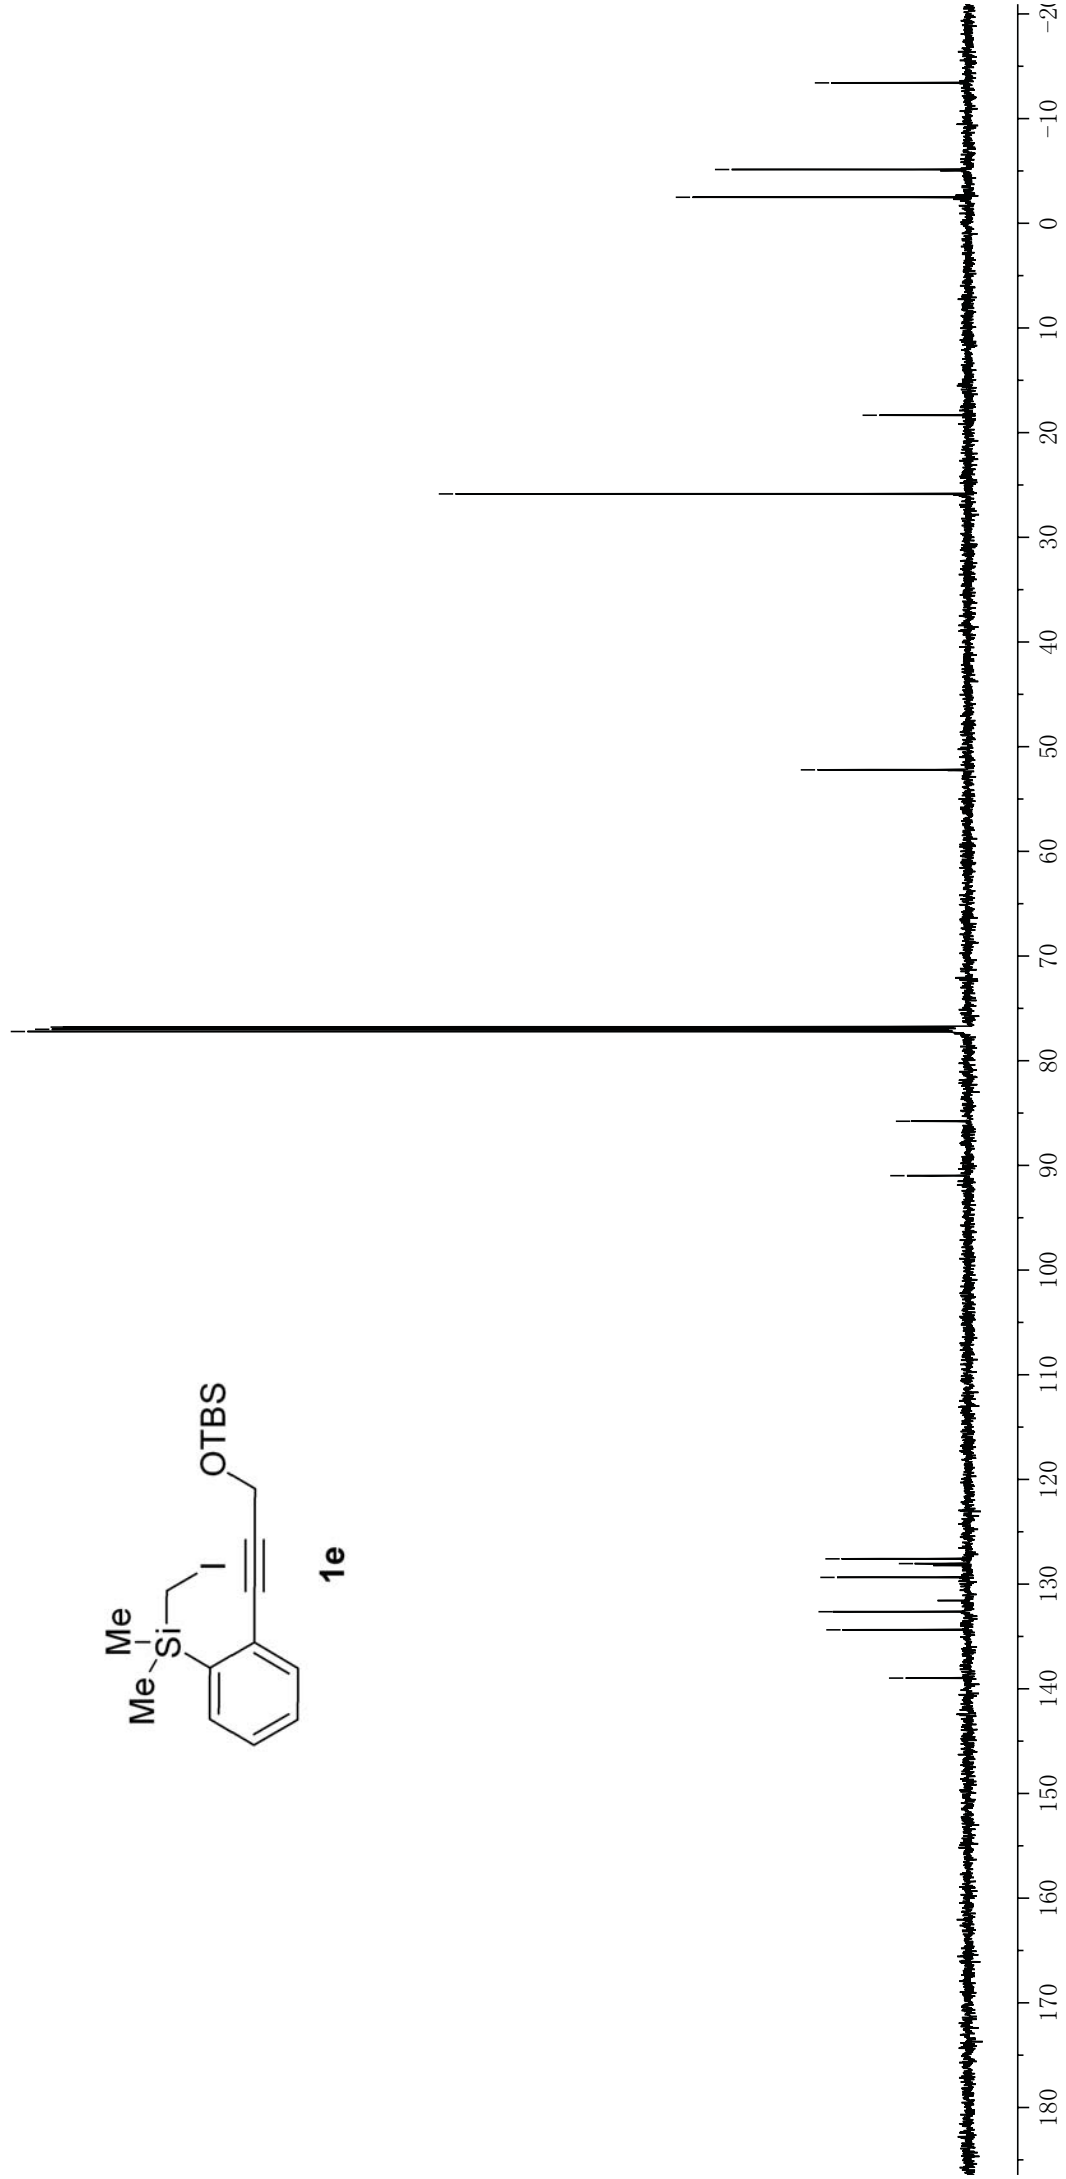

Lin-7-86-3I H1  
CDCI3 400MHZ

7.488  
7.482  
7.470  
7.466  
7.349  
7.346  
7.331  
7.327  
7.313  
7.308  
7.303  
7.288  
7.286  
7.270  
7.267  
7.260

3.521

2.580  
2.429

1.678  
1.664  
1.650  
1.636  
1.622  
1.454

0.514

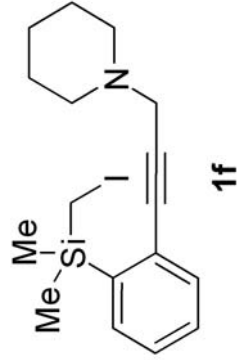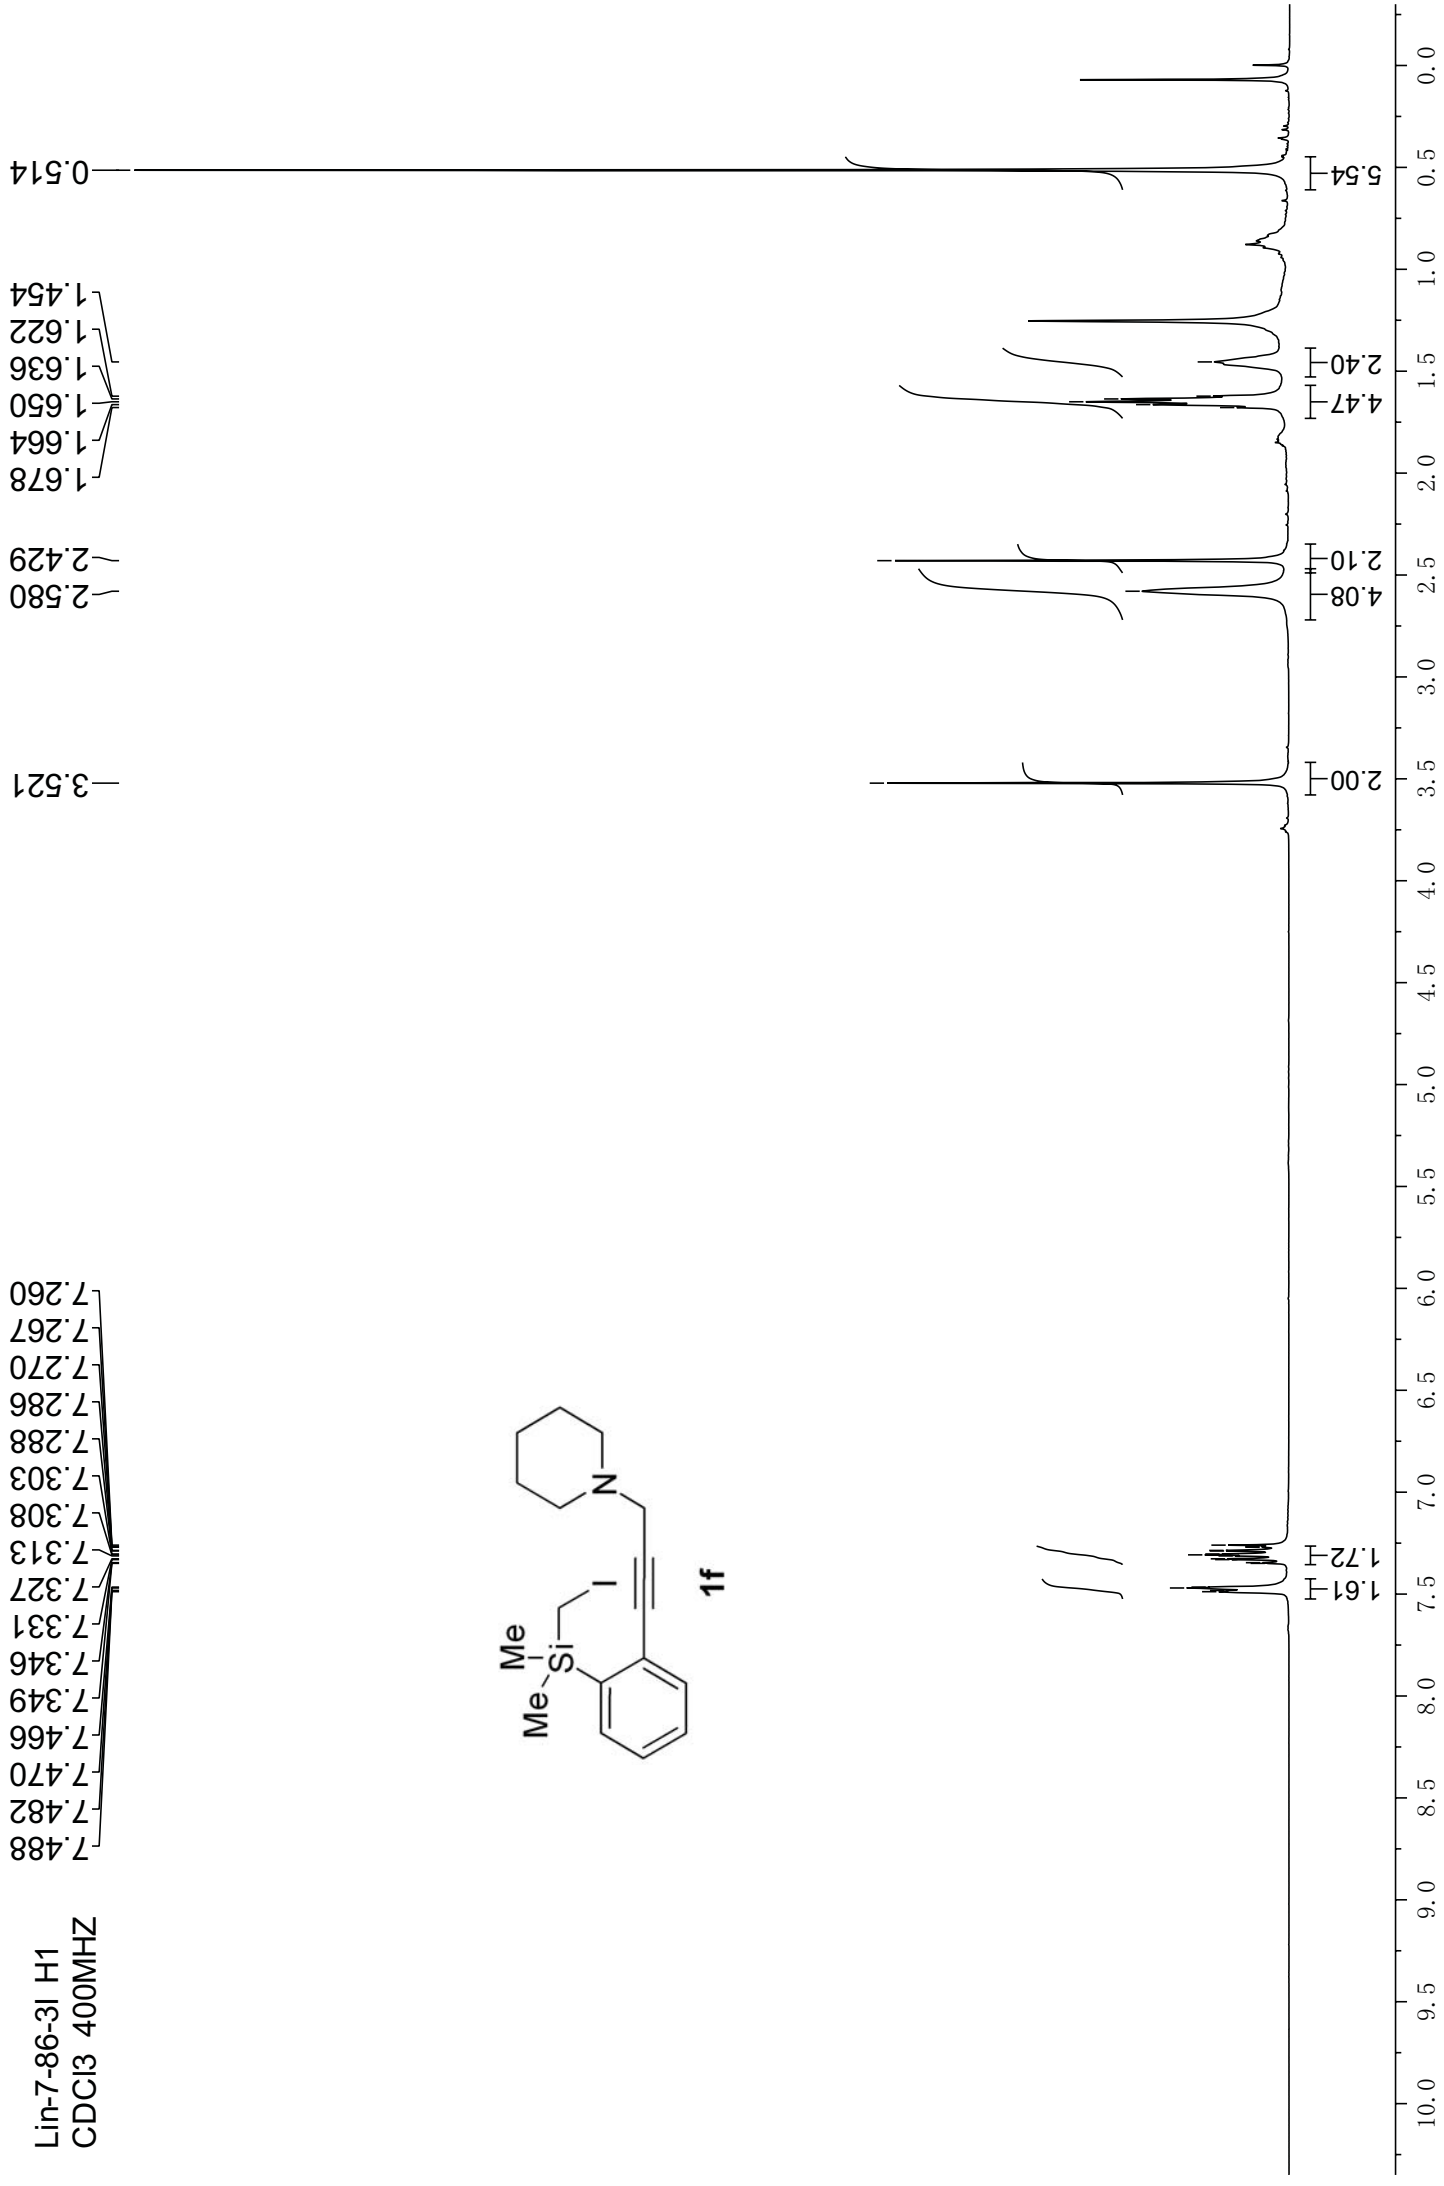



Lin-7-86-3I C13  
CDCI3 100MHZ

138.527  
134.290  
133.066  
129.371  
128.415  
127.369

88.706  
86.157  
77.317  
77.000  
76.683

53.542  
48.600

25.966  
23.864

2.555

13.292

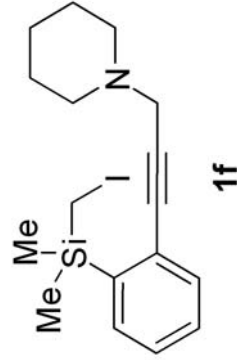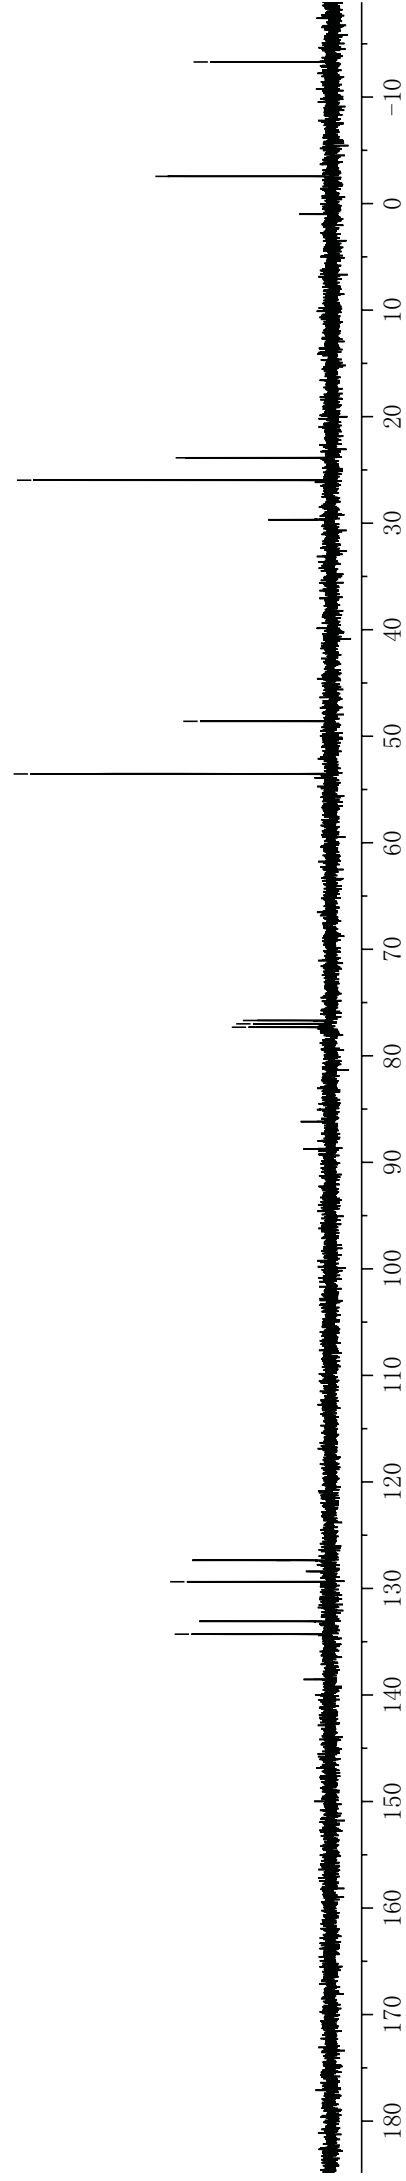

Lin-7-93-1 H1  
CDCI3 400MHZ

7.478  
7.461  
7.440  
7.421  
7.339  
7.321  
7.296  
7.277  
7.259

3.865  
3.847  
3.829

2.683  
2.665  
2.647  
2.427

0.929

0.517

0.118

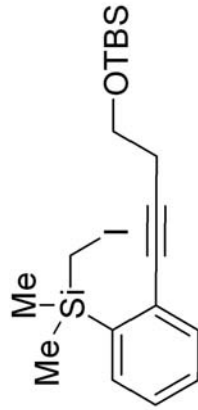

**1g**

|||

0.79  
0.82  
2.05

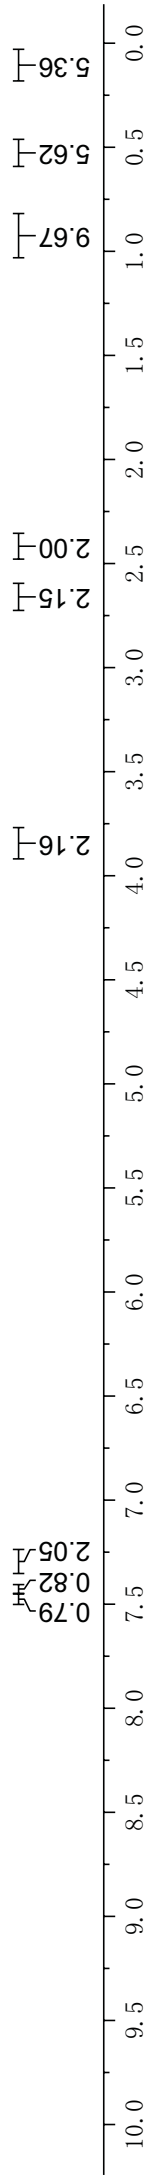

Lin-7-93-1 C13  
CDCl3 100MHZ

138.610  
134.252  
132.521  
129.354  
128.868  
127.075

90.481  
82.882  
77.319  
77.000  
76.685

61.747

25.922  
23.966  
18.337

2.597  
5.225

13.304

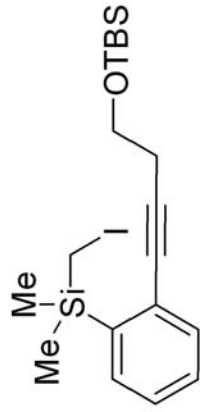

1g

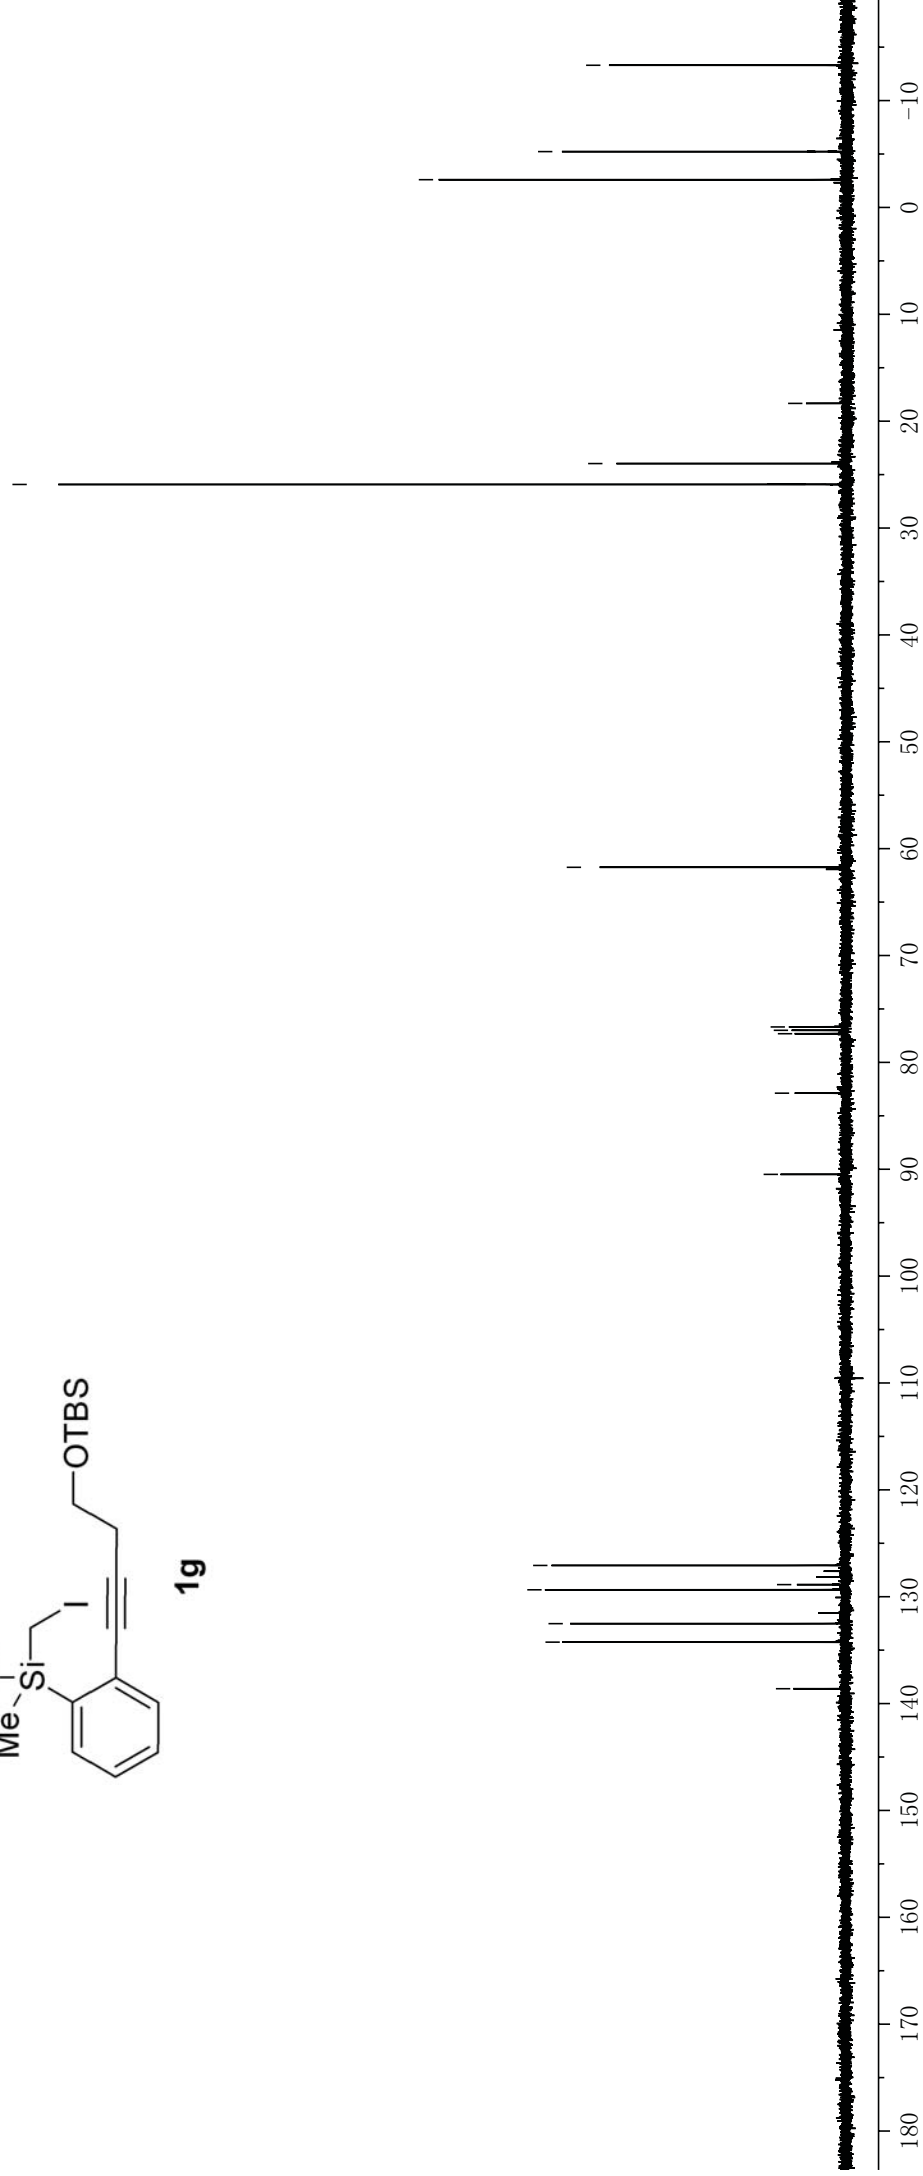

Lin-7-93-2 H1  
CDCI3 400MHZ

7.499  
7.481  
7.468  
7.449  
7.360  
7.342  
7.322  
7.303  
7.286  
7.260

4.794  
4.778  
4.762  
4.746

2.449

1.542  
1.526

0.949

0.533  
0.182  
0.173

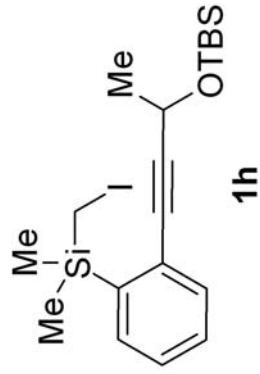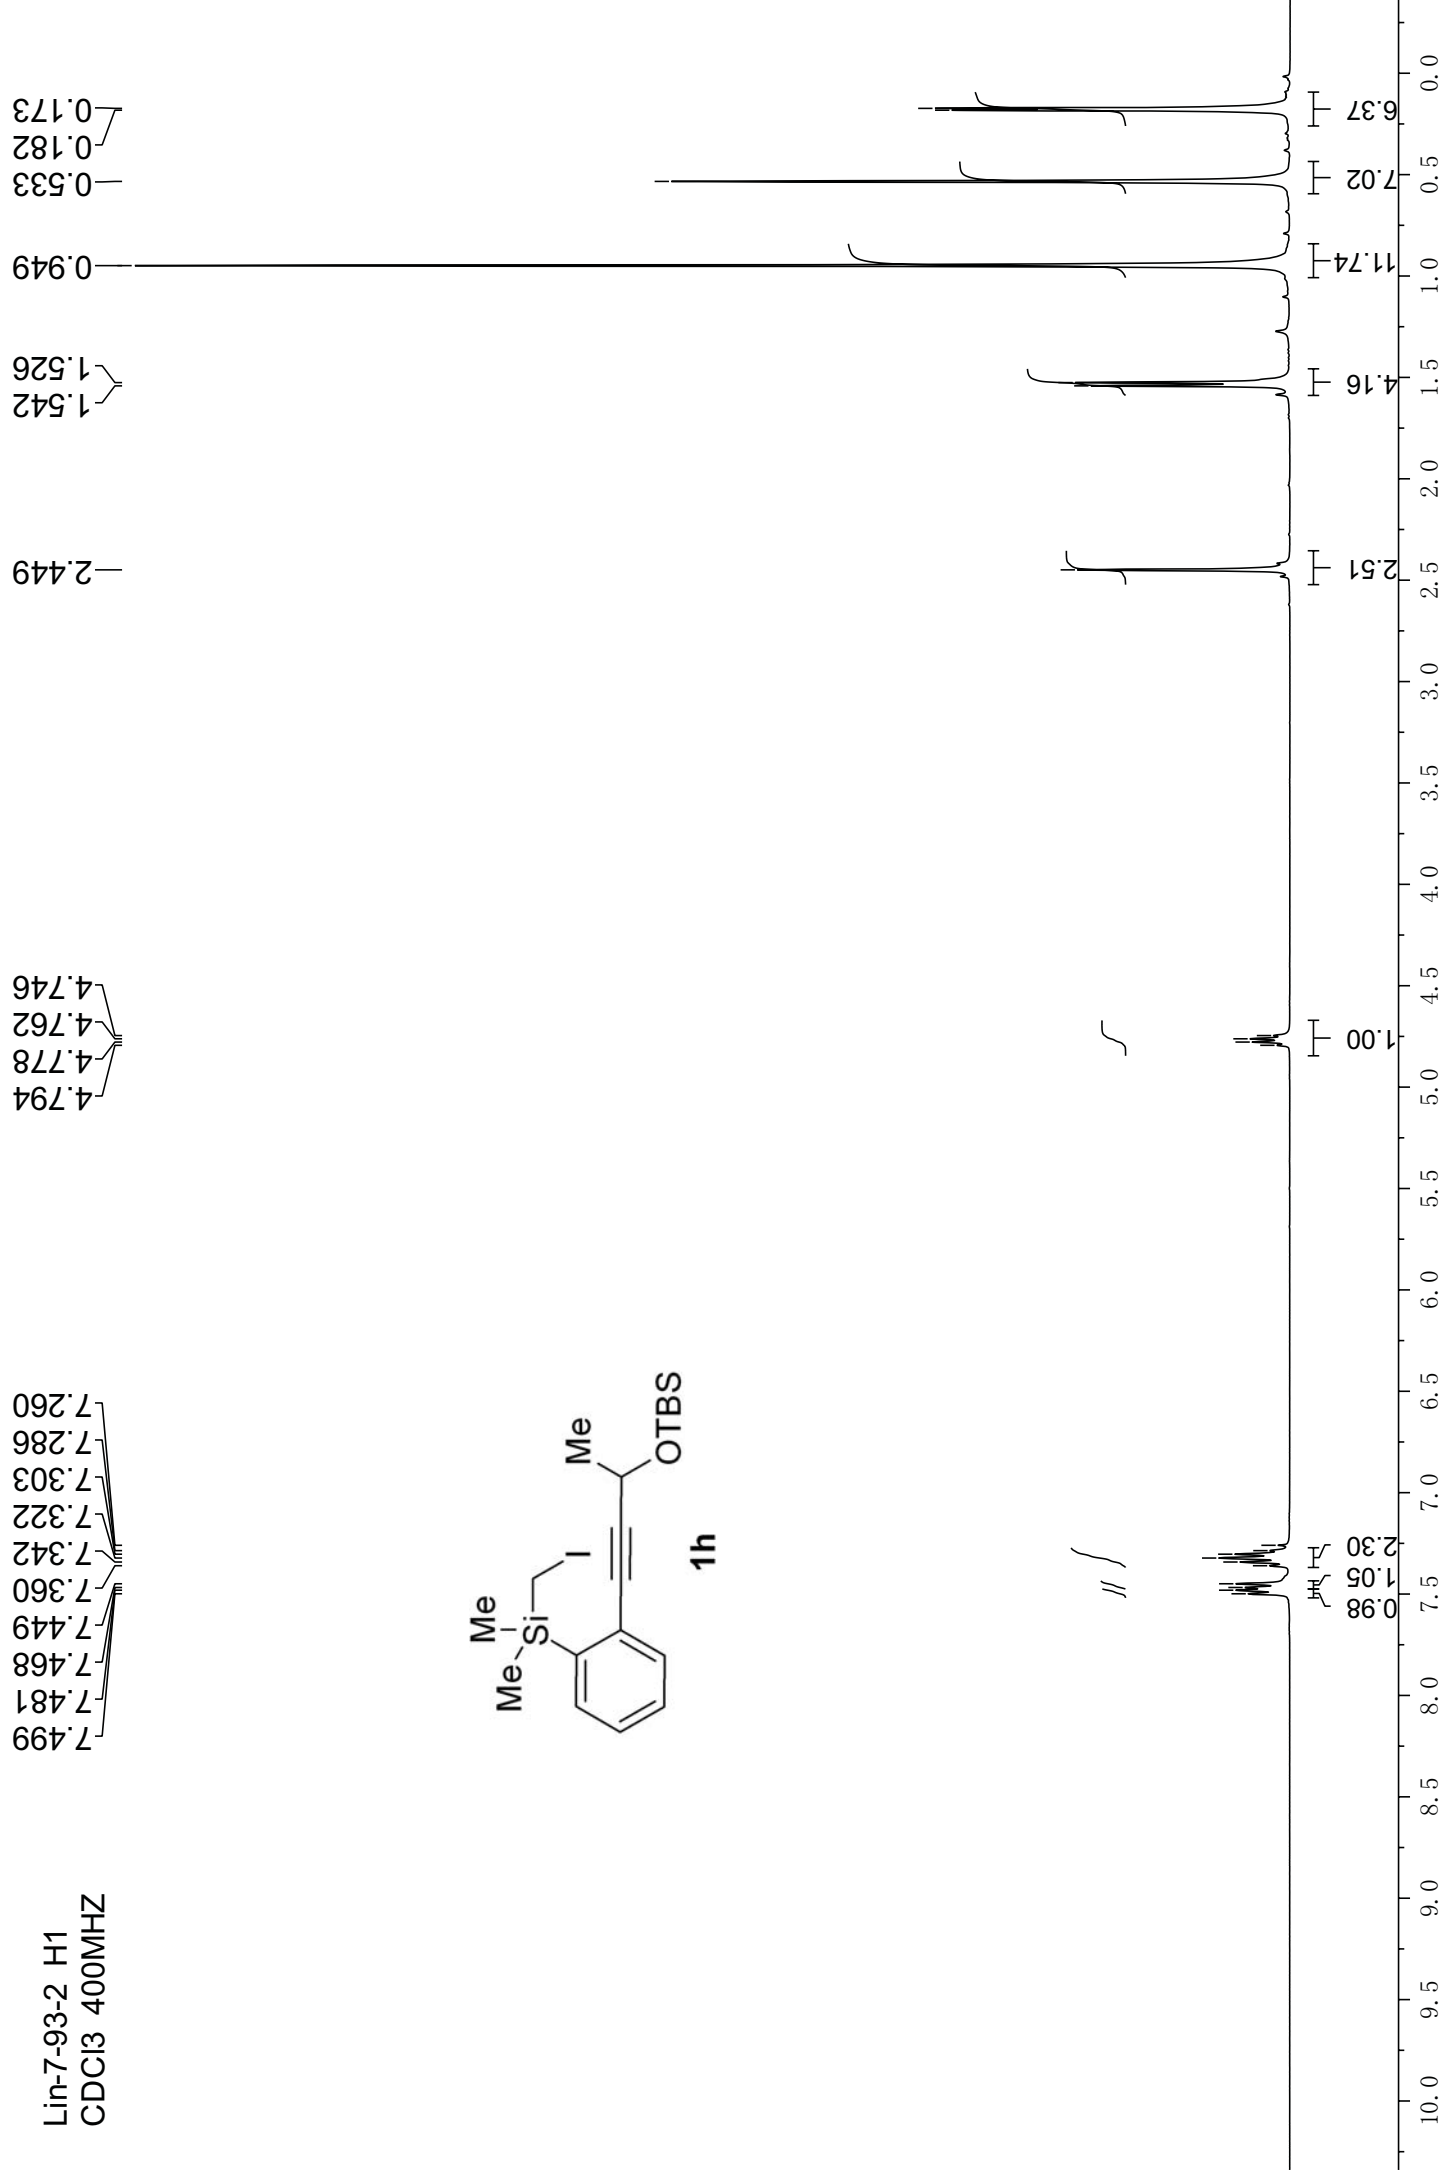

Lin-7-93-2 C13  
CDCI3 100MHZ

138.681  
134.311  
132.653  
129.351  
128.174  
127.464

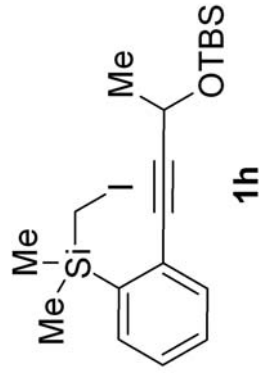

94.894

84.281  
77.317  
77.000  
76.684

59.412

25.828  
25.292

18.223

2.532  
2.557  
4.483  
4.893  
13.371

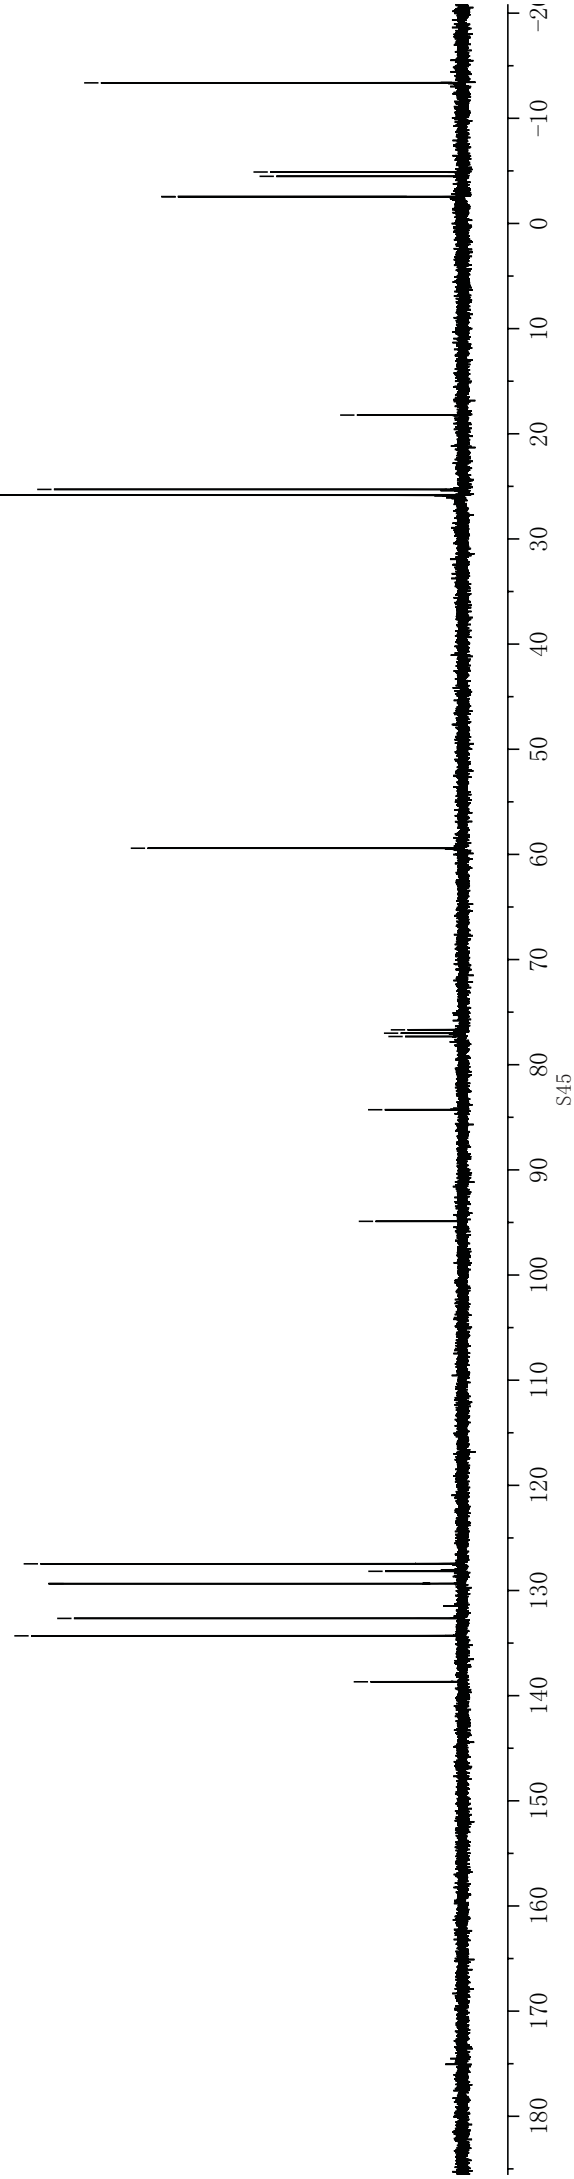

Lin-7-53-2a H1  
CDCI3 400MHZ

7.454  
7.436  
7.421  
7.402  
7.316  
7.298  
7.280  
7.260  
7.243  
7.224

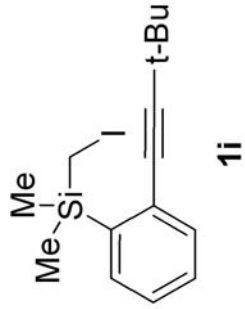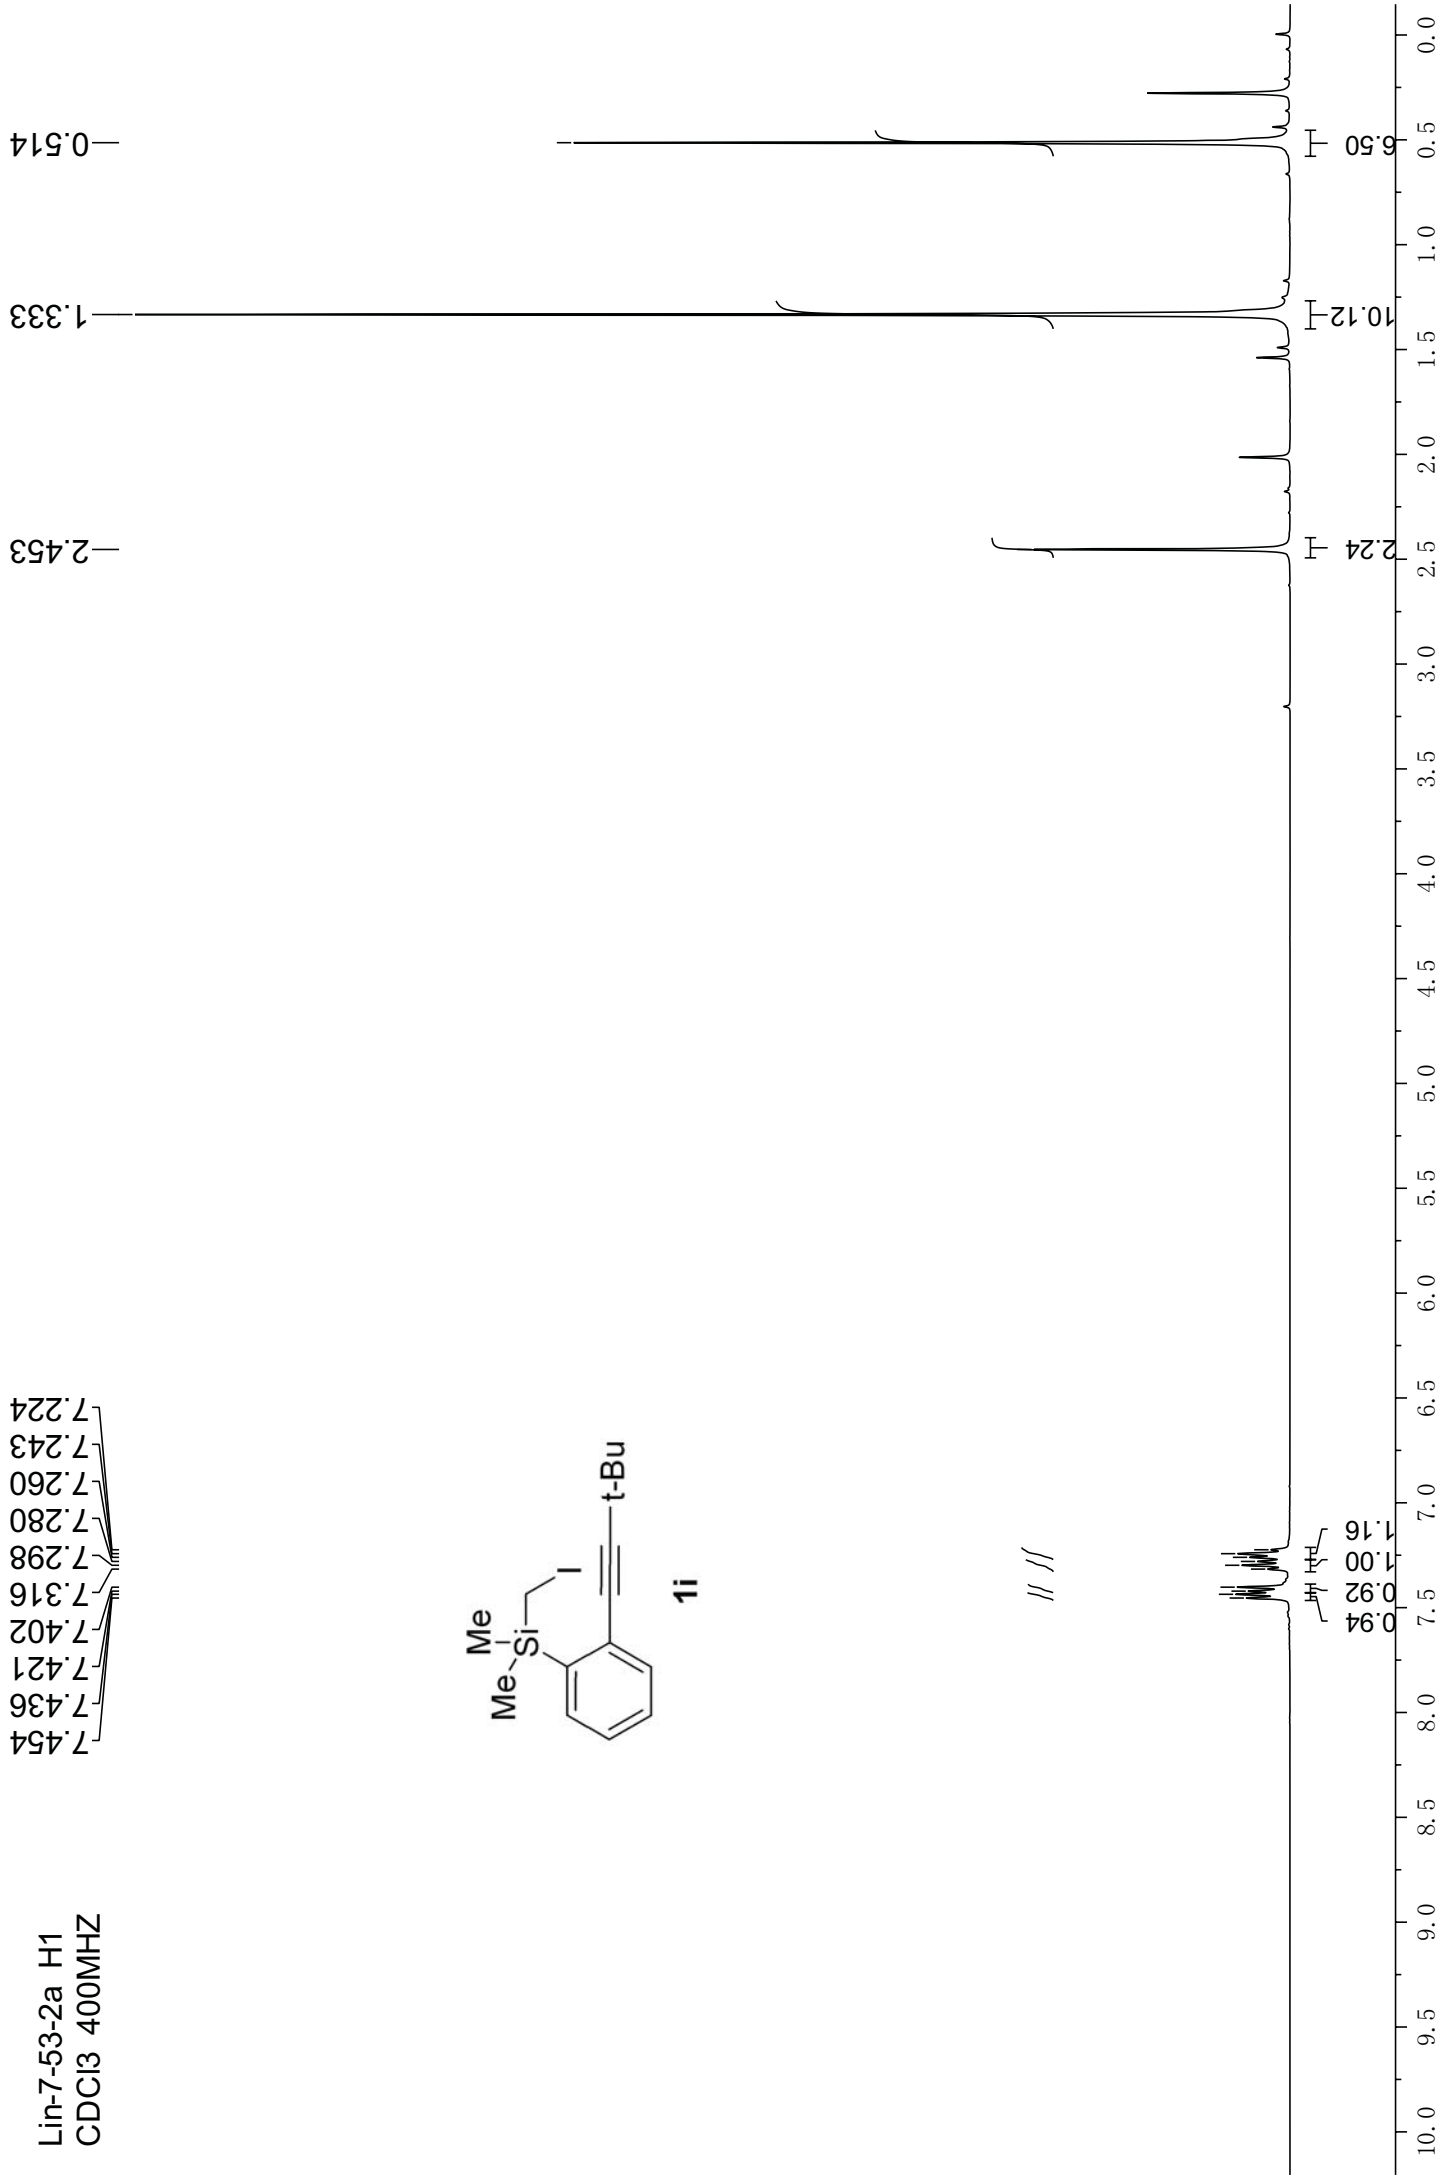

Lin-7-53-2a C13  
CDCI3 150MHZ

138.166  
134.198  
132.714  
129.322  
129.254  
126.856

101.466

80.575  
77.212  
77.000  
76.789

30.829  
28.082

2.711

13.080

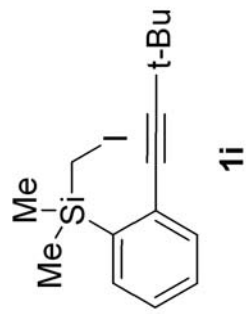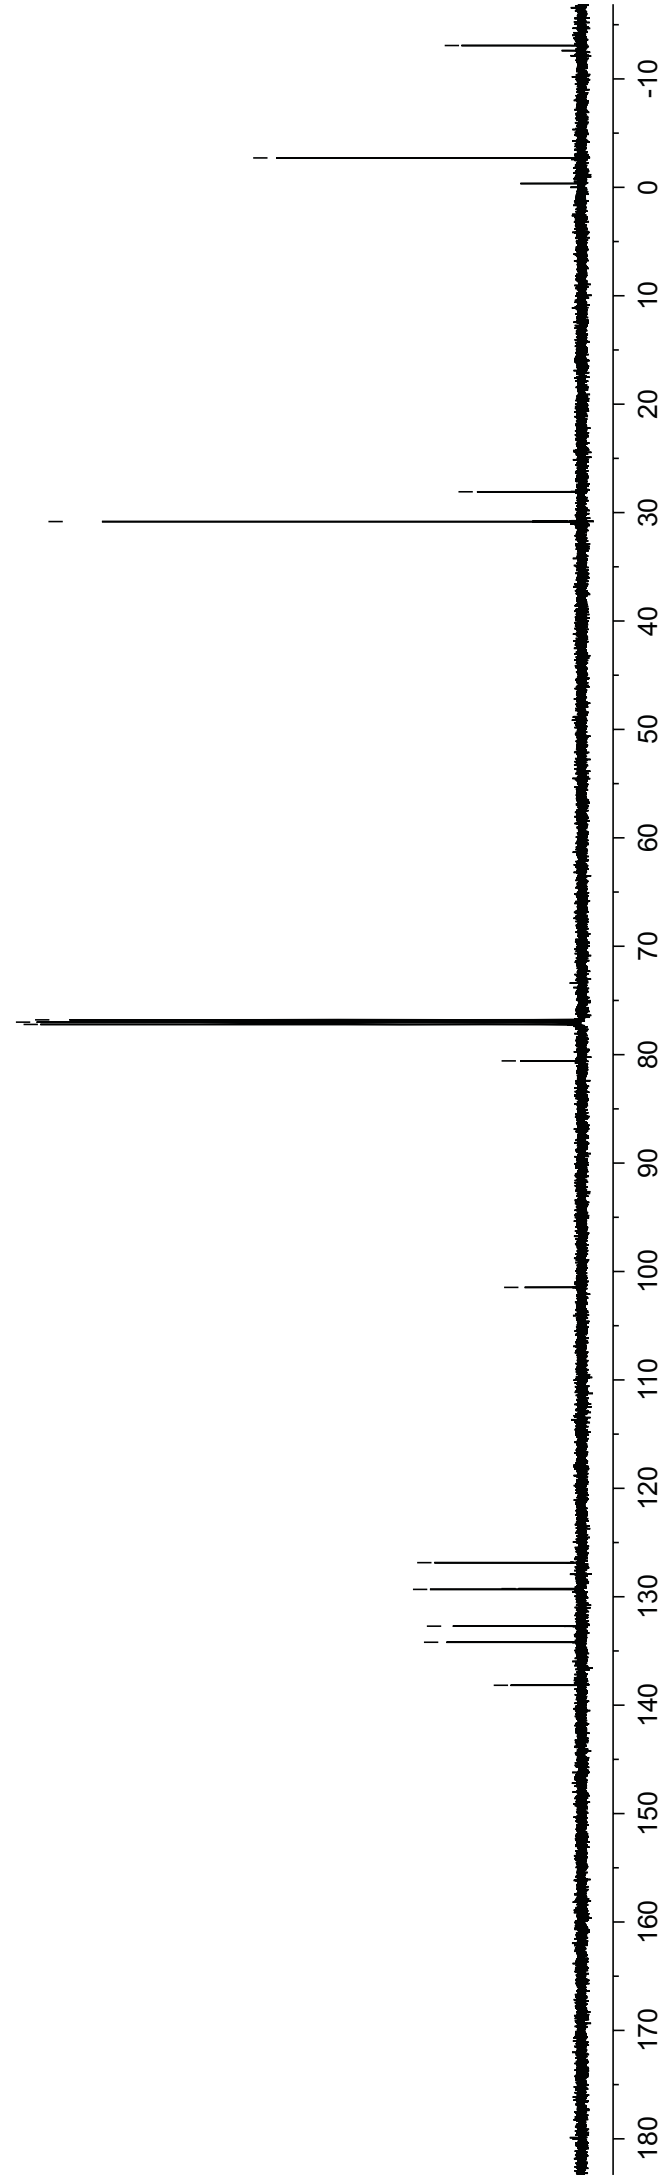

Lin-7-68-1 H1  
CDCI3 600MHZ

7.504  
7.492  
7.486  
7.475  
7.343  
7.331  
7.320  
7.307  
7.295  
7.260

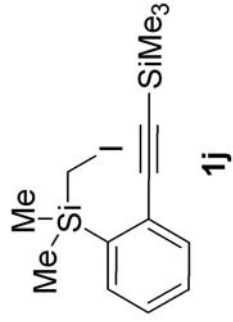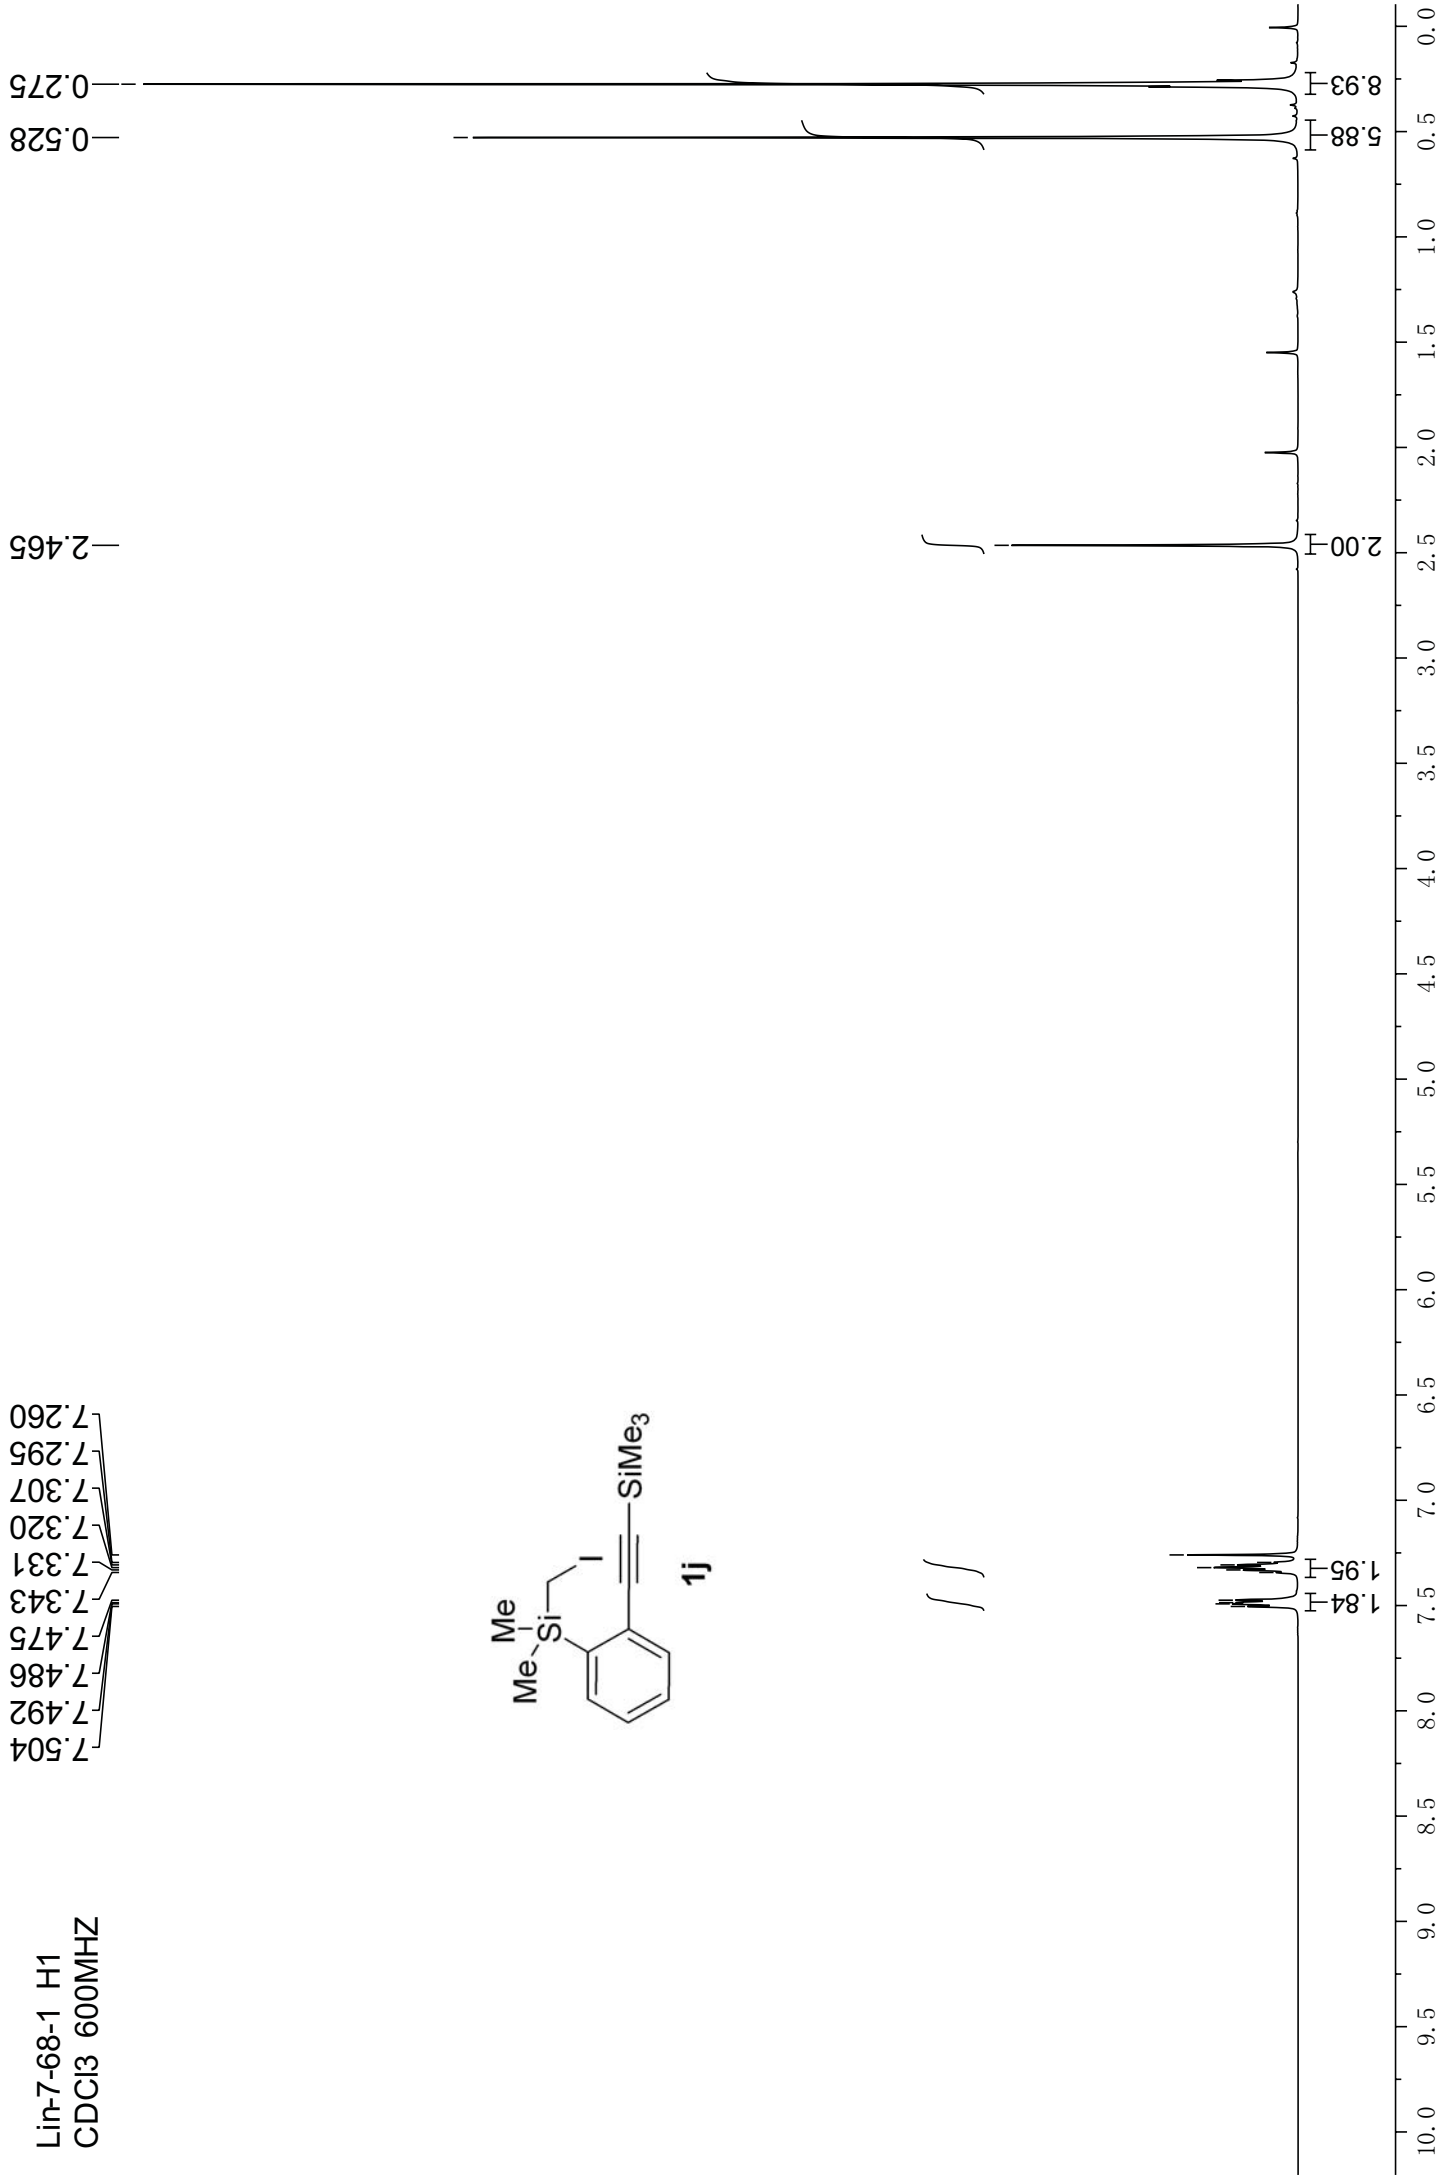



Lin-7-68-1 C13  
CDCI3 100MHZ

139.199  
134.285  
132.922  
129.312  
128.201  
127.836

106.297  
97.730

77.317  
77.000  
76.681

0.208  
2.790

13.468

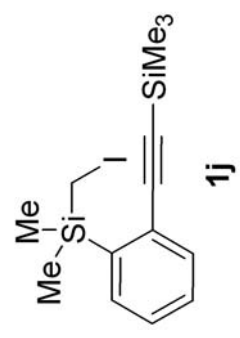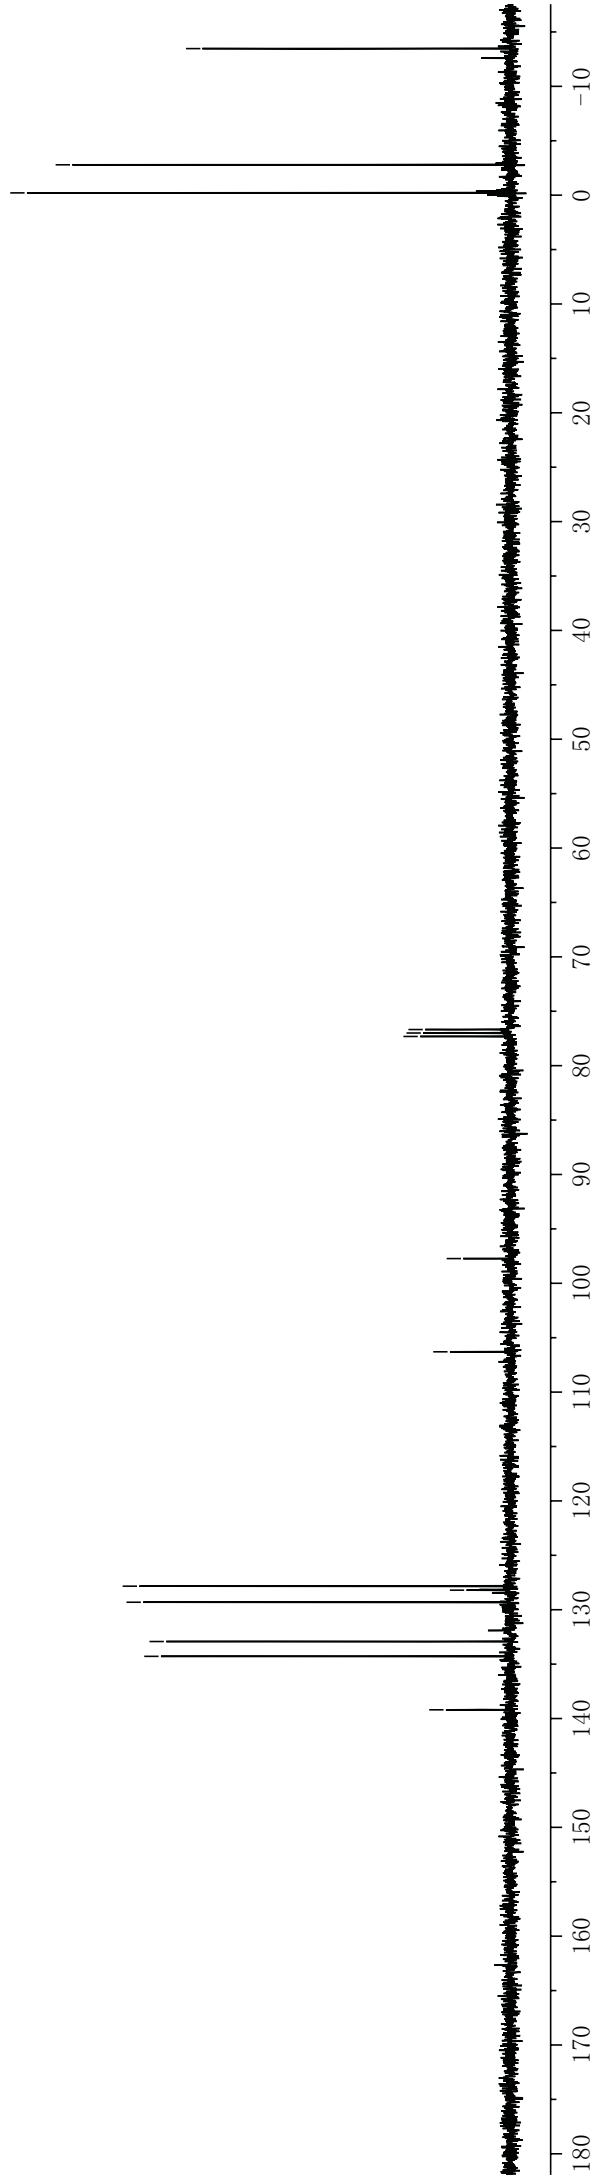

Lin-7-68-2 H1  
CDCI3 400HMZ

7.526  
7.509  
7.489  
7.472  
7.468  
7.349  
7.334  
7.331  
7.317  
7.303  
7.285  
7.260

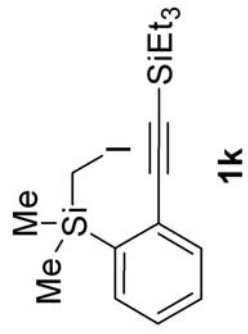

1.076  
1.056  
1.037  
0.738  
0.719  
0.699  
0.679  
0.530

2.478

0.77  
0.83  
1.88

2.00

8.20

5.56

5.63

10.0 9.5 9.0 8.5 8.0 7.5 7.0 6.5 6.0 5.5 5.0 4.5 4.0 3.5 3.0 2.5 2.0 1.5 1.0 0.5 0.0

Lin-7-68-2 C13  
CDCI3 100HMZ

138.882  
134.273  
133.561  
129.291  
128.397  
127.738

107.271  
95.612

77.317  
77.000  
76.684

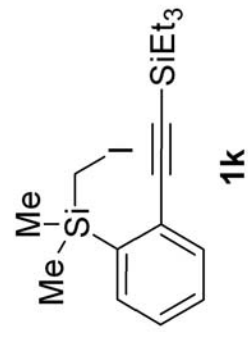

7.508  
4.300  
2.738  
13.365

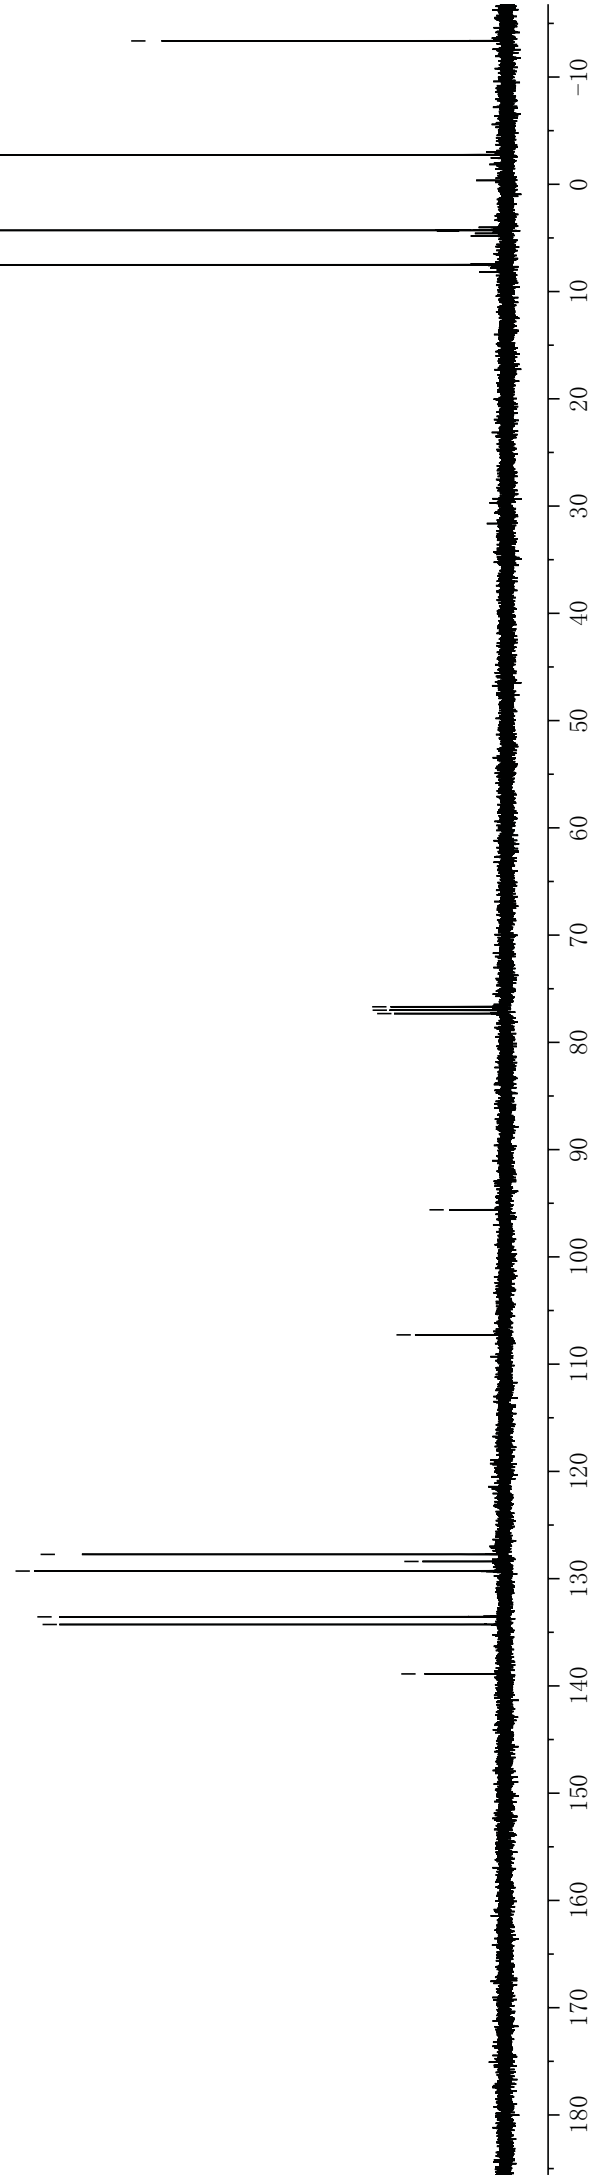

Lin-6-83-1 H1  
CDCI3 400MHZ

7.591  
7.572  
7.547  
7.529  
7.393  
7.377  
7.359  
7.340  
7.260

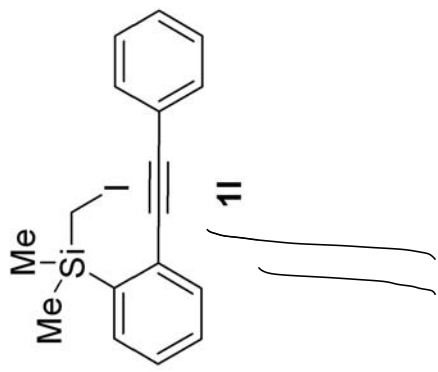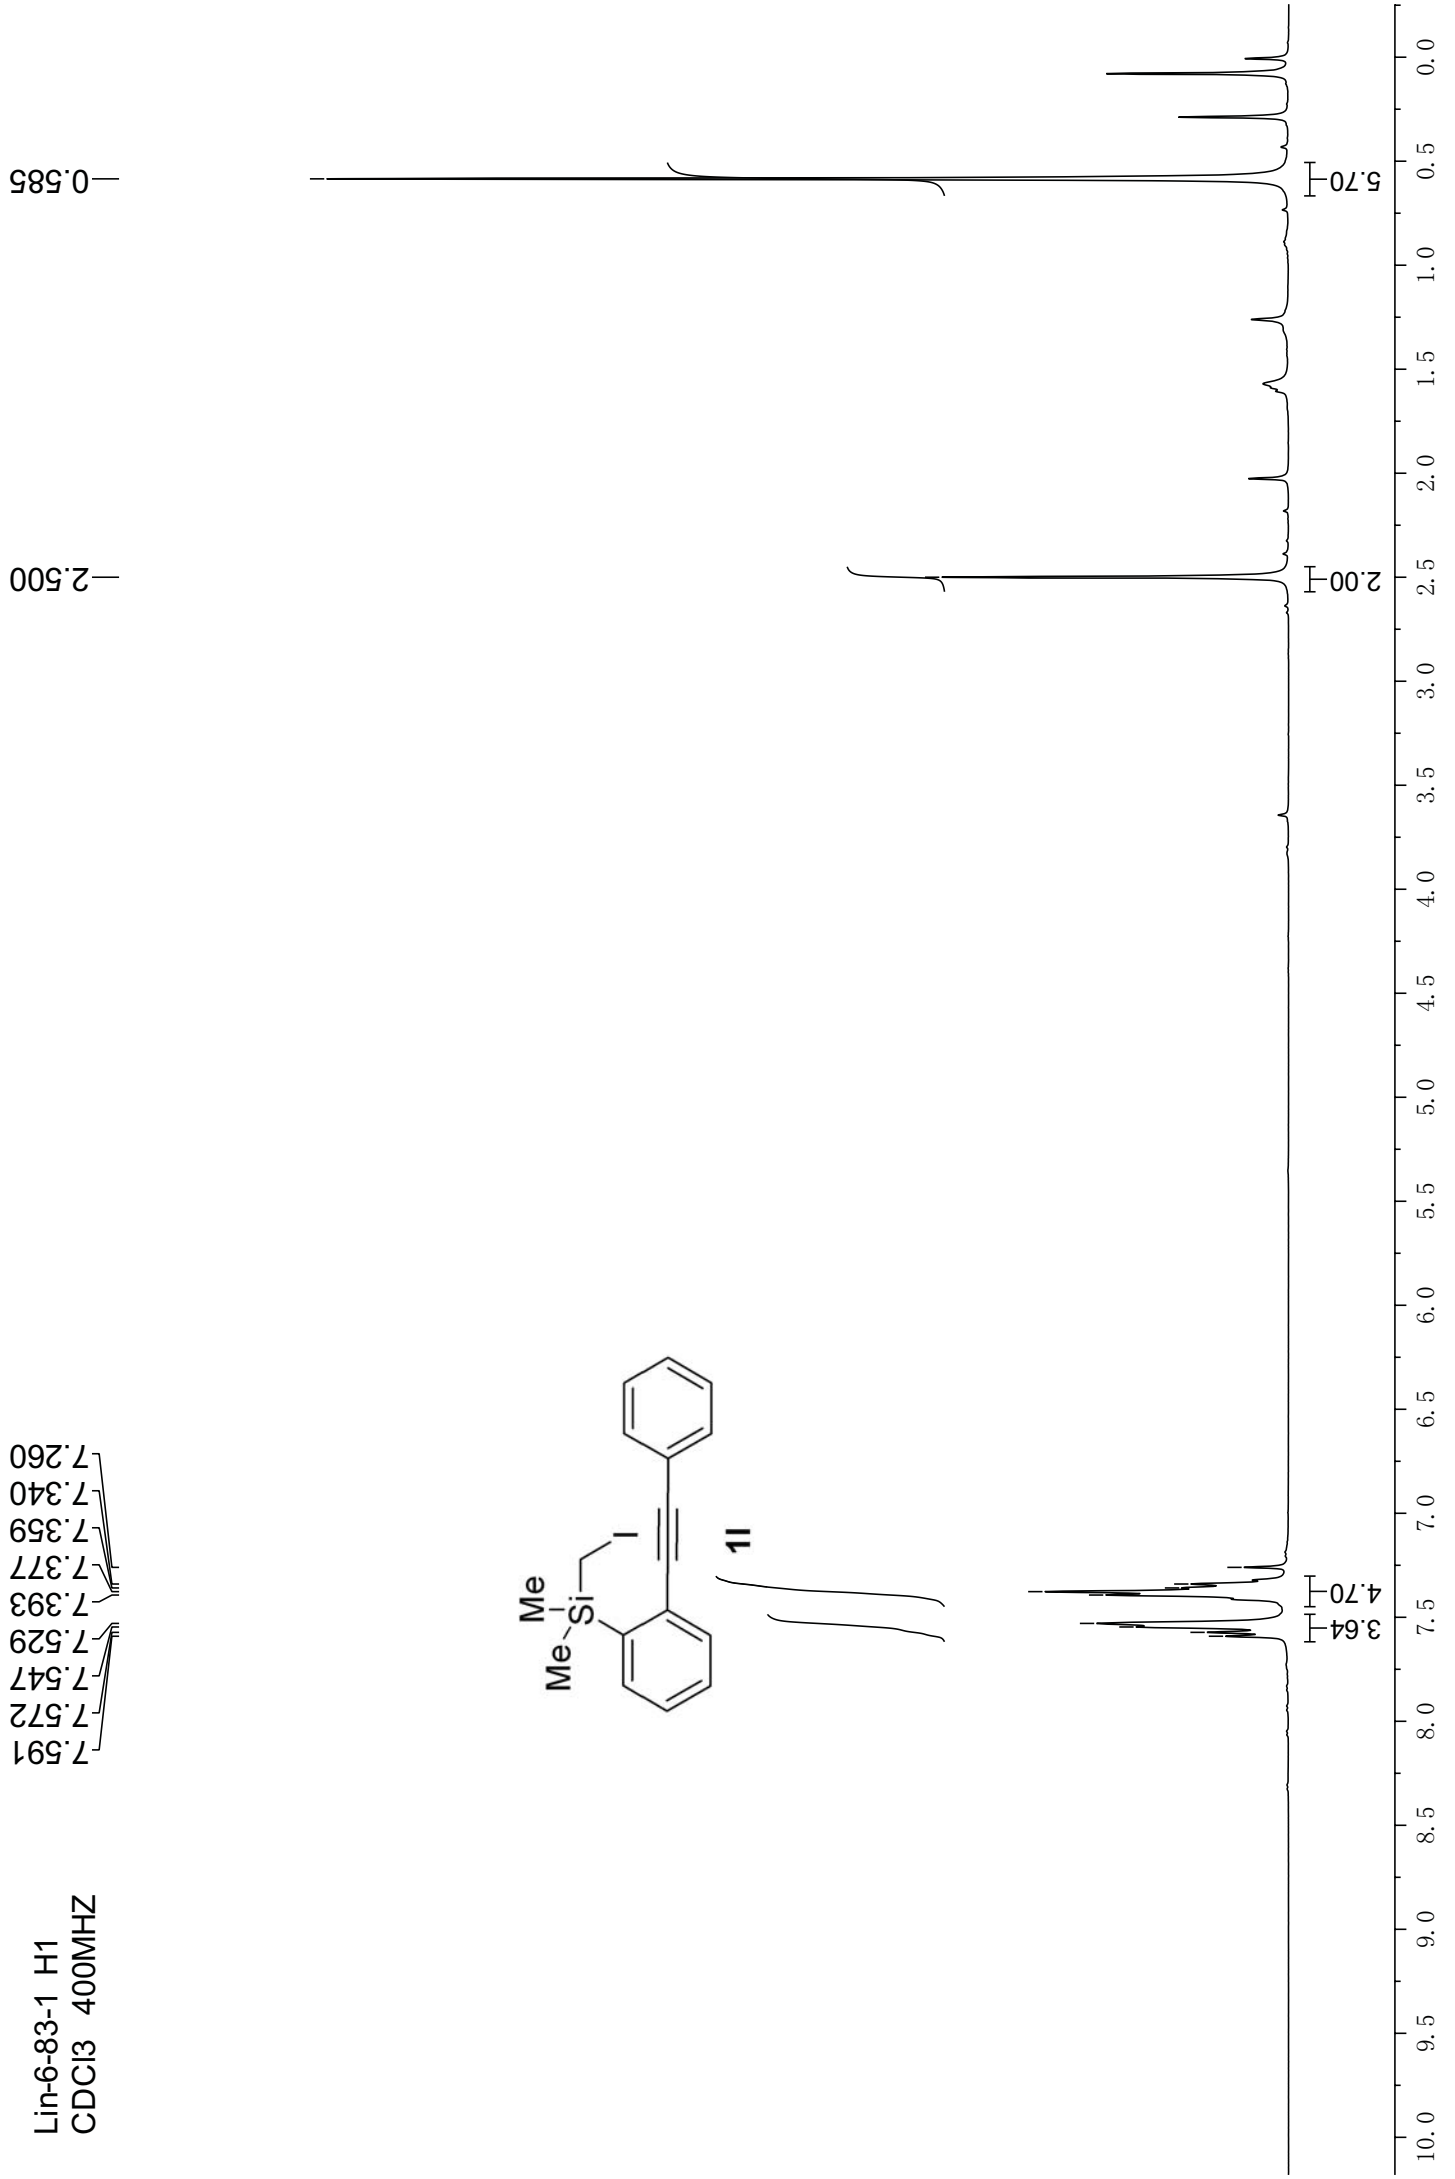

Lin-6-83-1 C13  
CDCI3 100MHZ

138.772  
134.417  
132.618  
131.278  
129.468  
128.502  
128.458  
128.295  
127.593  
122.972

92.505  
90.641

77.316  
77.000  
76.682

-2.538

-13.365

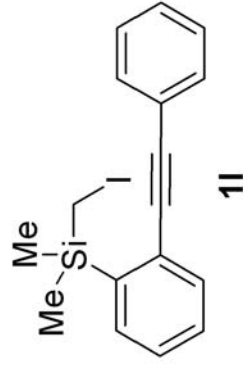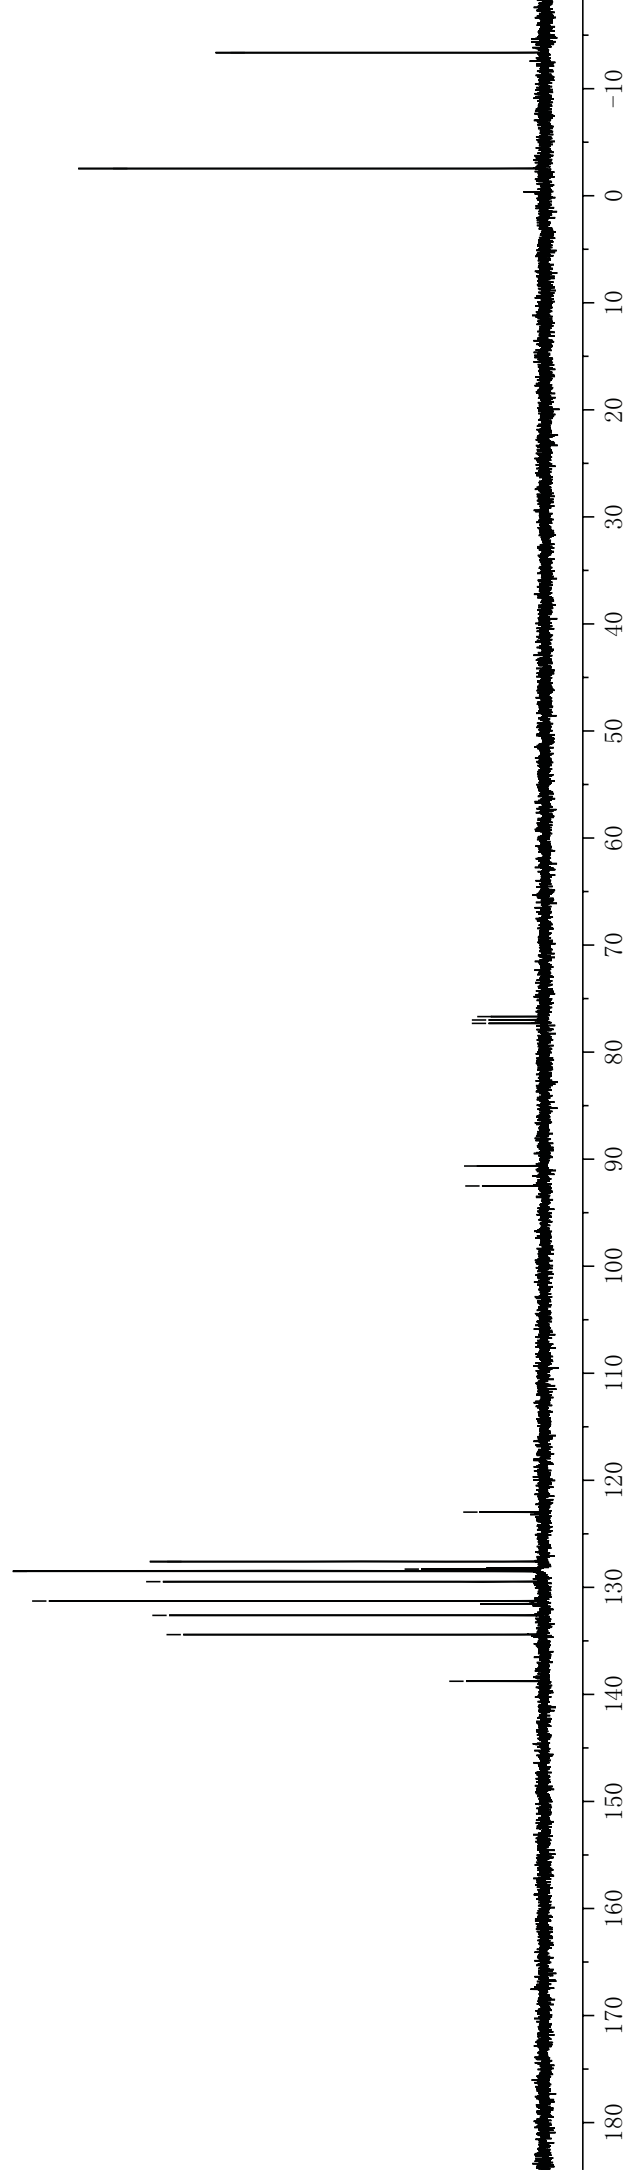

Lin-7-53-4a H1  
CDC13 400MHZ

7.577  
7.556  
7.531  
7.517  
7.510  
7.496  
7.413  
7.395  
7.376  
7.361  
7.343  
7.325  
7.260  
7.108  
7.086  
7.065

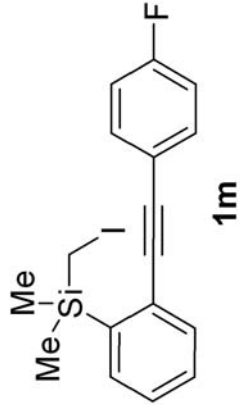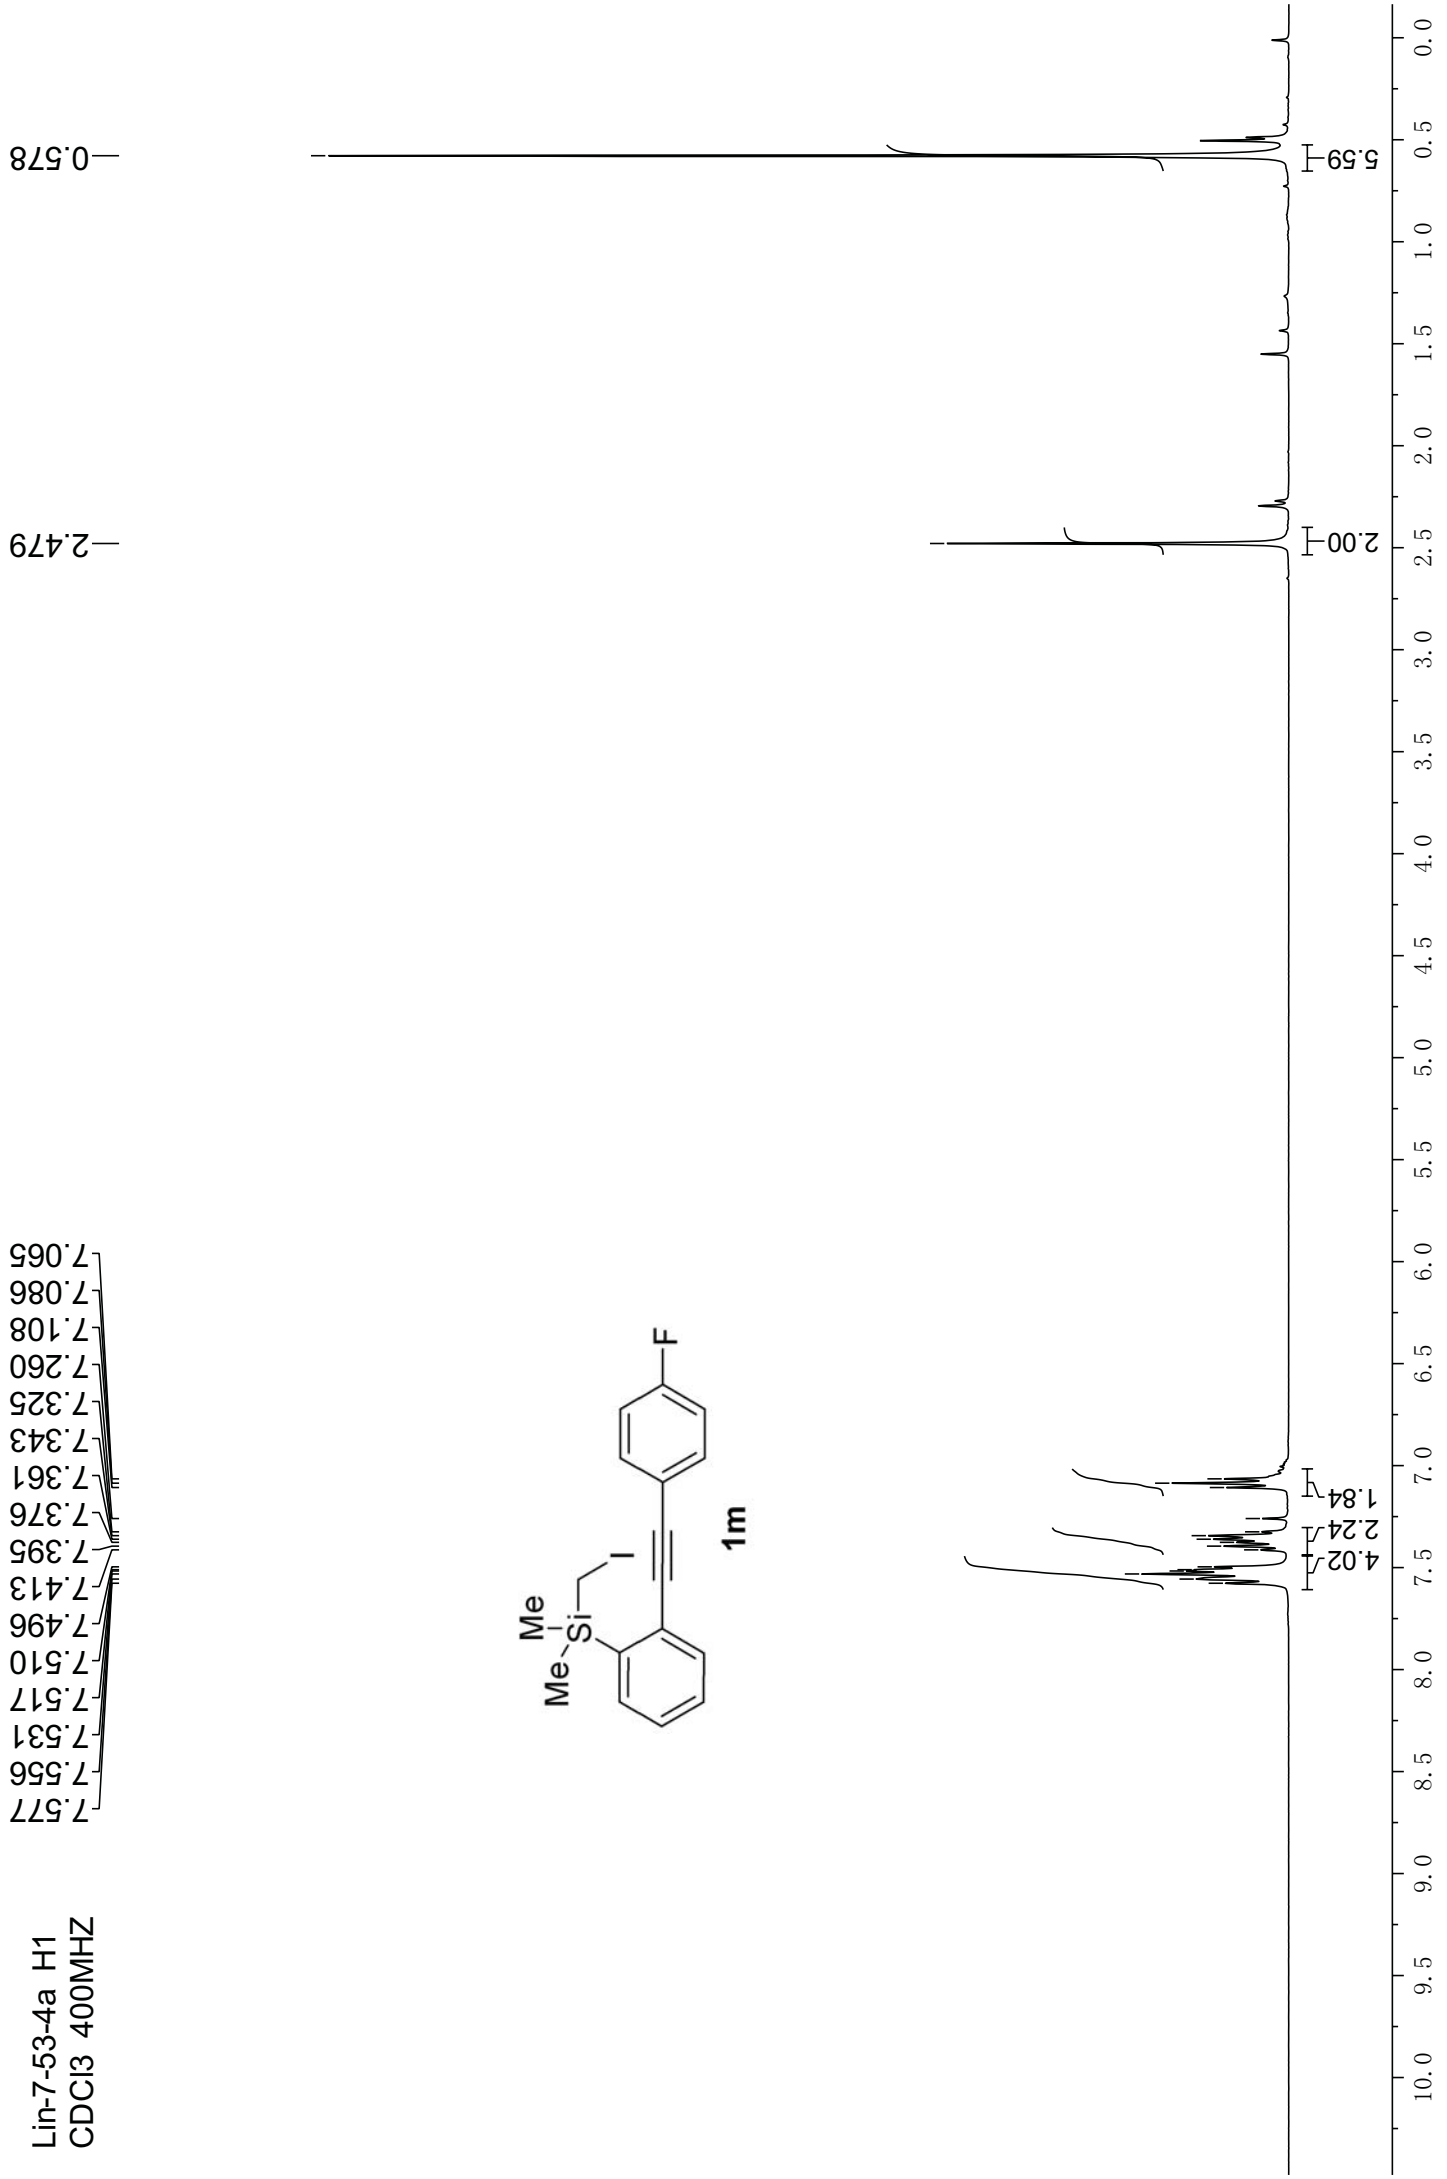

Lin-7-53-4a C13  
CDC13 150MHZ

163.436  
161.779

138.774  
134.461  
133.228  
133.173  
132.603  
129.516  
128.162  
127.691  
119.125  
119.102  
115.948  
115.802

91.450  
90.343  
77.212  
77.000  
76.789

2.531

13.509

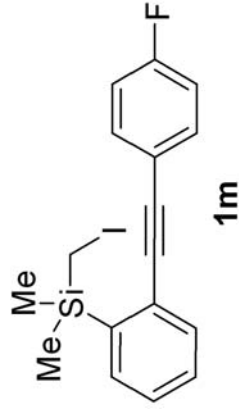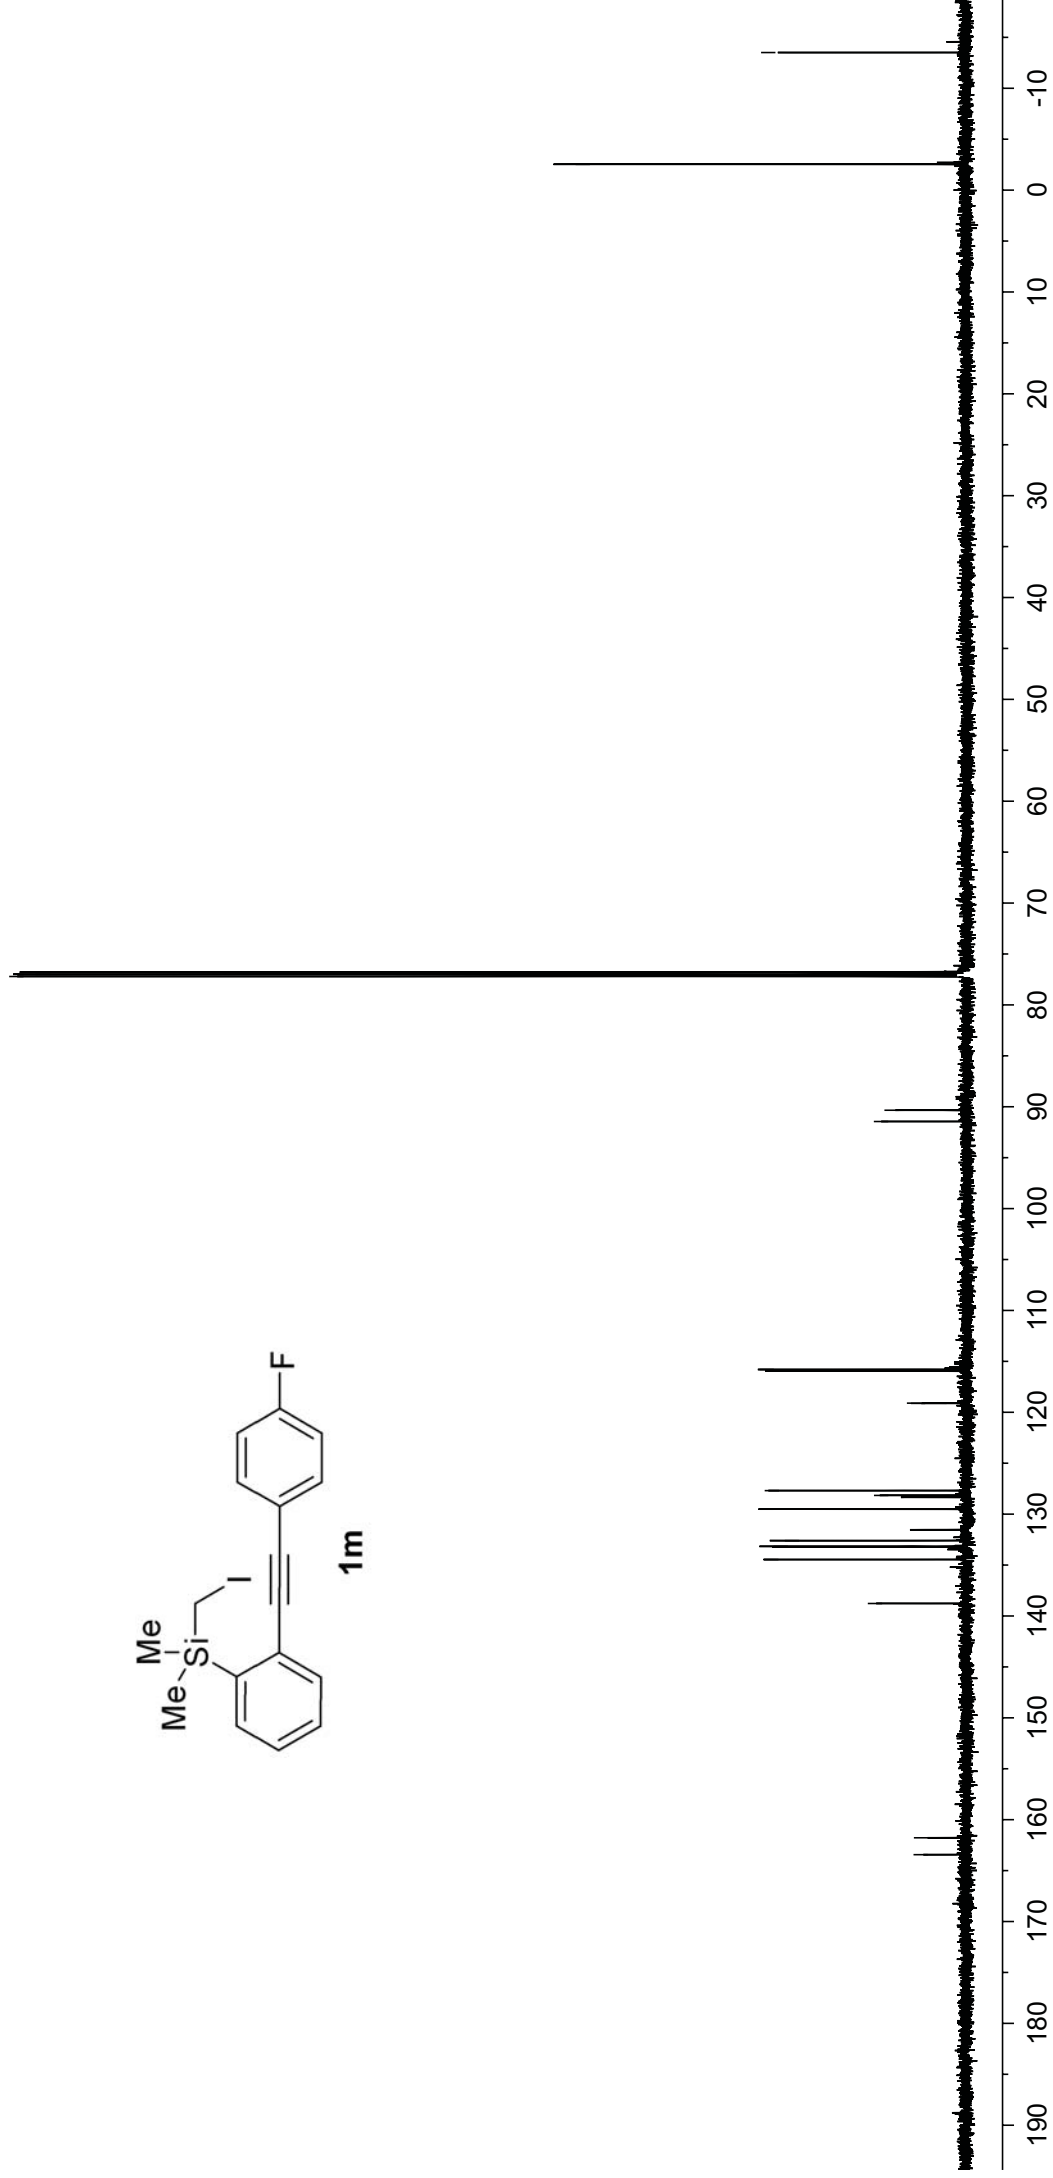

Lin-7-53-3a H1  
CDCI3 400MHZ

7.581  
7.562  
7.547  
7.529  
7.445  
7.425  
7.408  
7.389  
7.371  
7.347  
7.329  
7.311  
7.260  
7.210  
7.191  
7.159

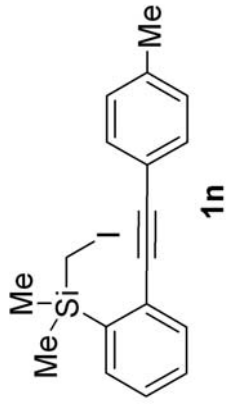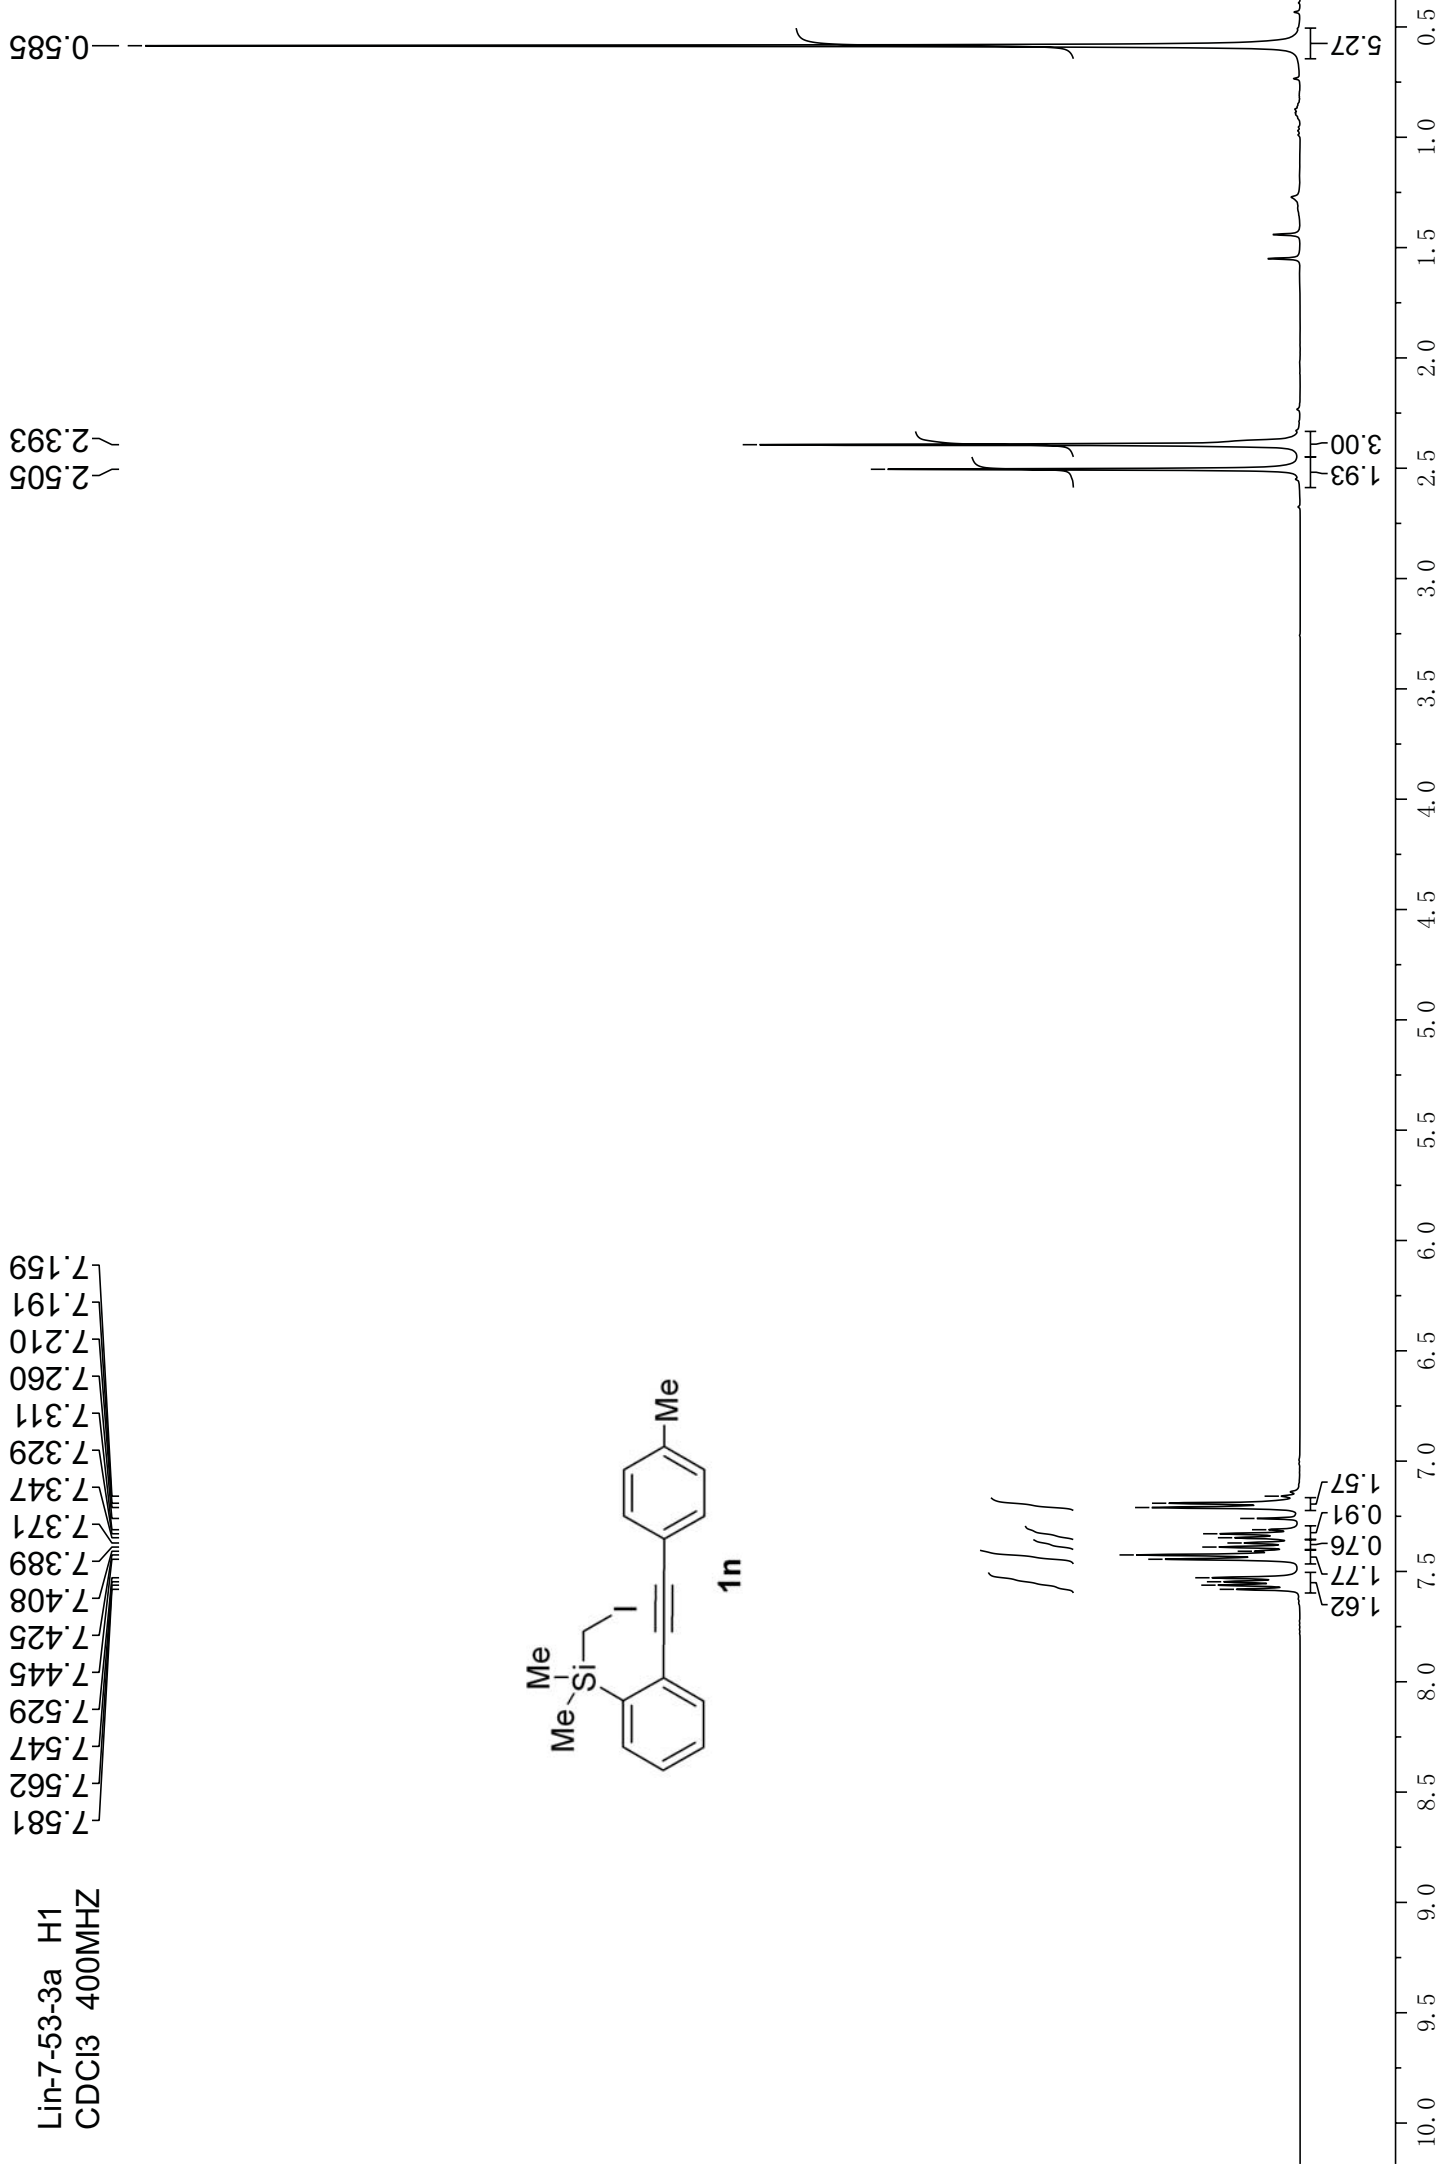



Lin-7-53-3a C13  
CDCI3 100MHZ

138.683  
134.411  
132.520  
131.205  
129.468  
129.289  
128.575  
127.430  
119.951

92.754  
90.046  
77.212  
77.000  
76.788

21.532

2.544

13.287

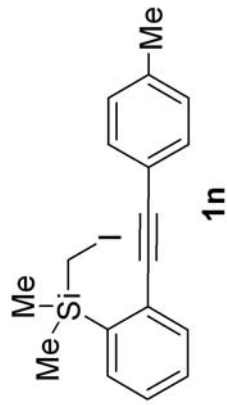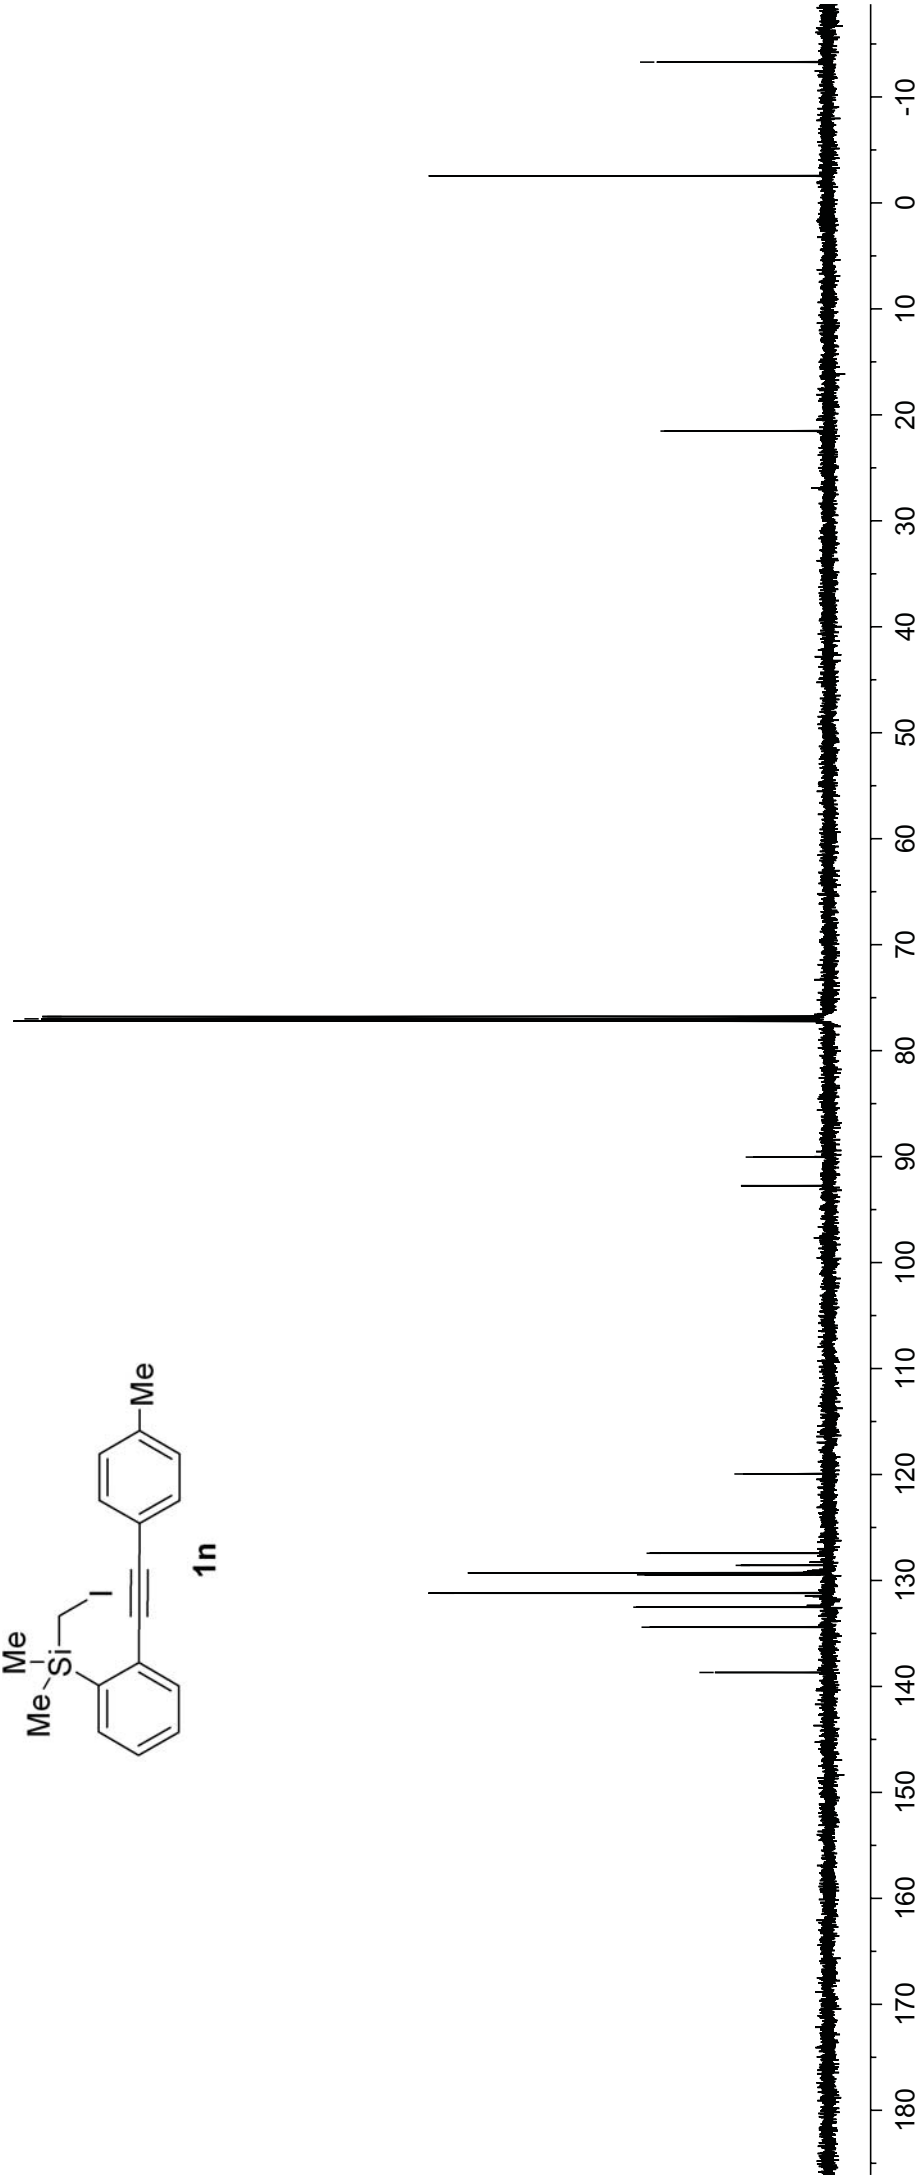

Lin-7-95-1R H1  
CDC13 400MHZ

8.650  
8.639  
7.726  
7.722  
7.707  
7.703  
7.688  
7.684  
7.665  
7.648  
7.558  
7.543  
7.539  
7.516  
7.497  
7.416  
7.401  
7.398  
7.385  
7.380  
7.367  
7.349  
7.274  
7.265  
7.244

2.521

0.593

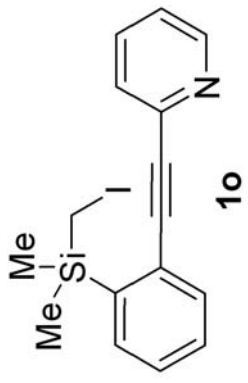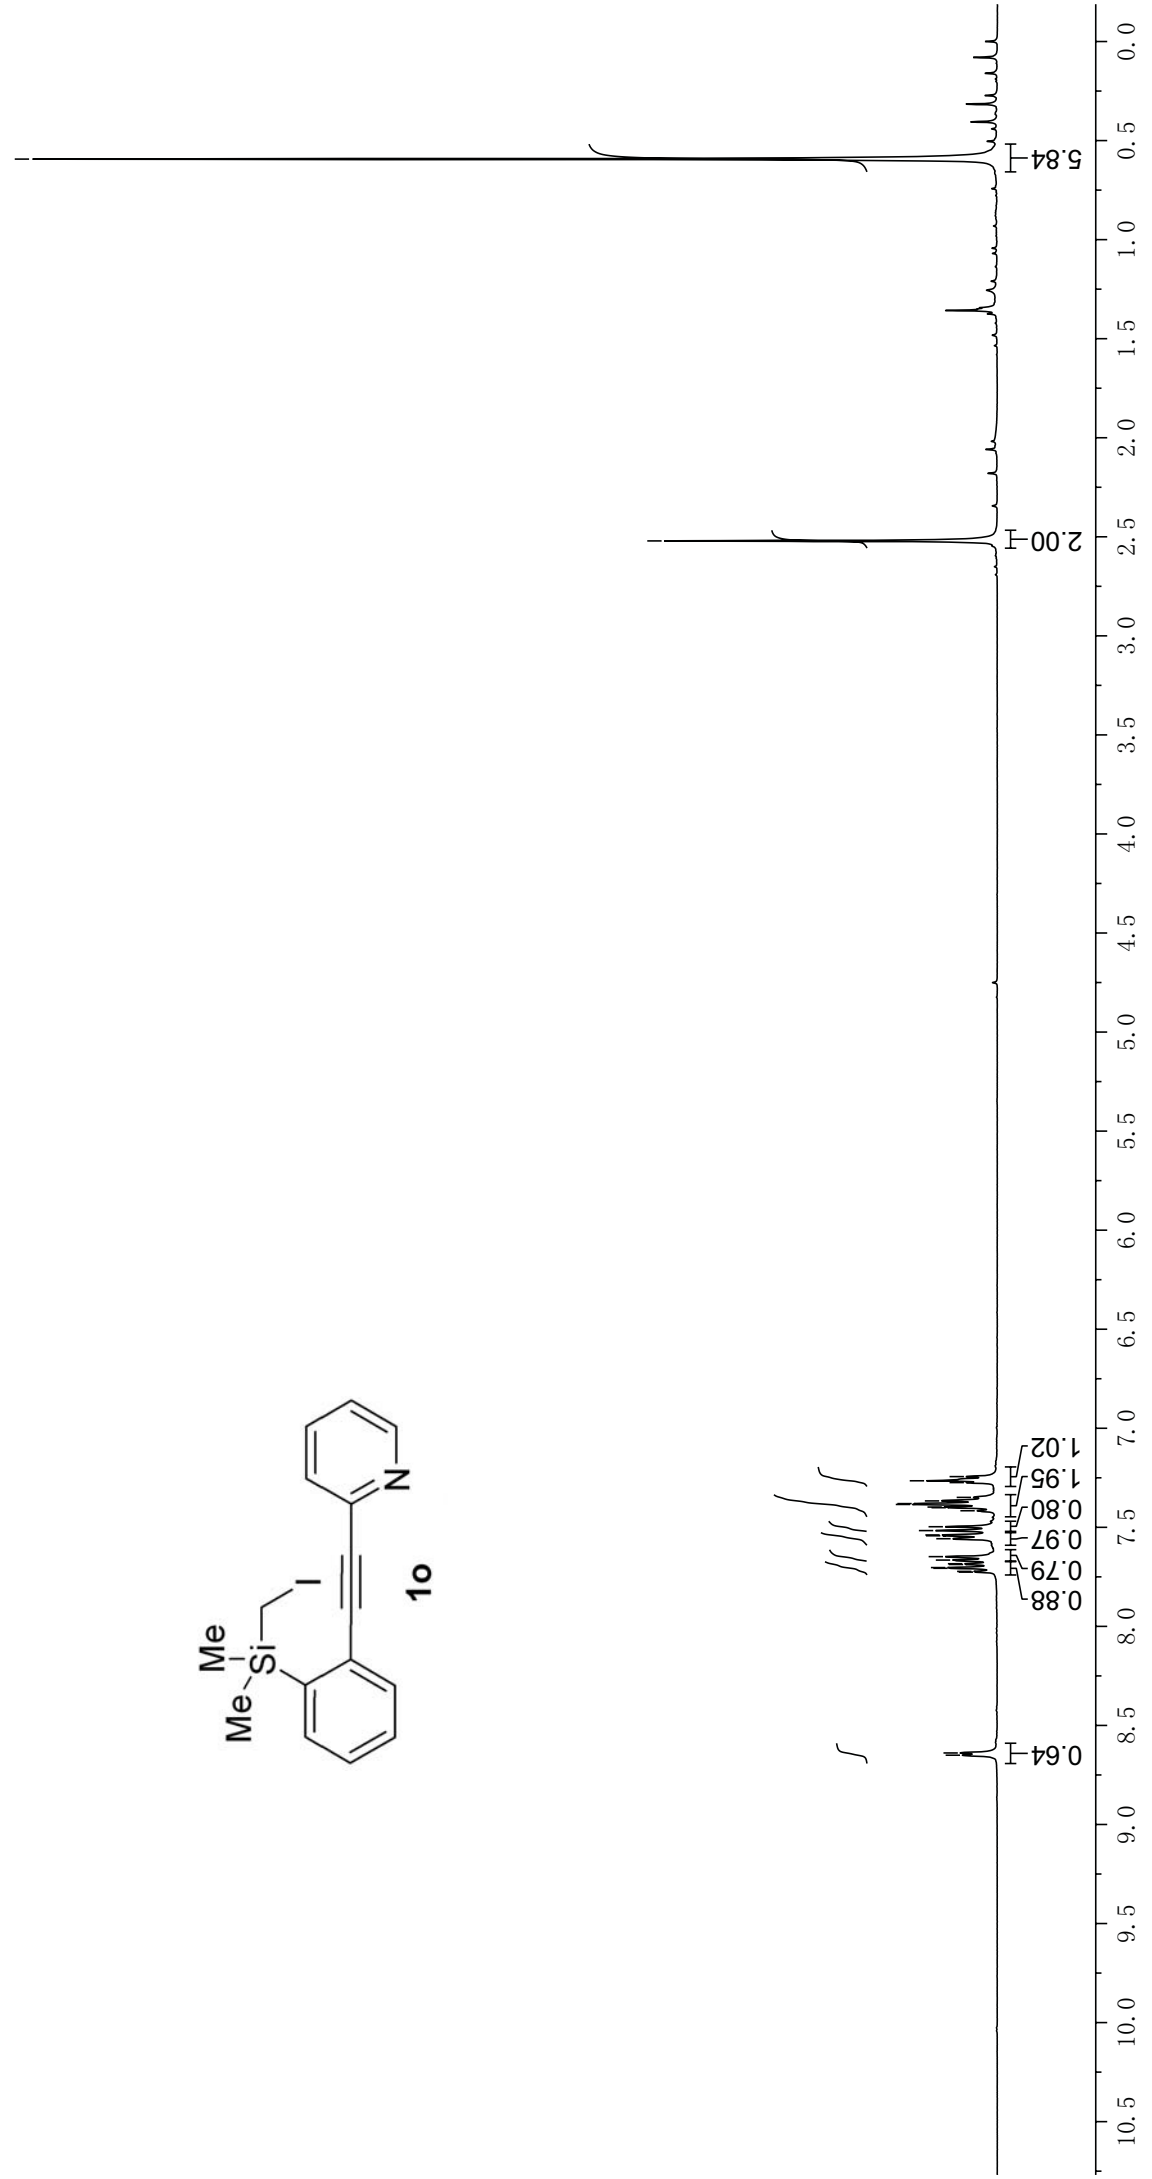

Lin-7-95-1R C13  
CDC13 100MHZ

150.228  
143.144  
139.454  
136.211  
134.424  
133.190  
129.485  
128.245  
127.221  
126.808  
122.858

91.632  
90.173

77.320  
77.000  
76.681

2.511

13.406

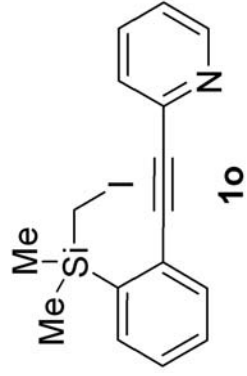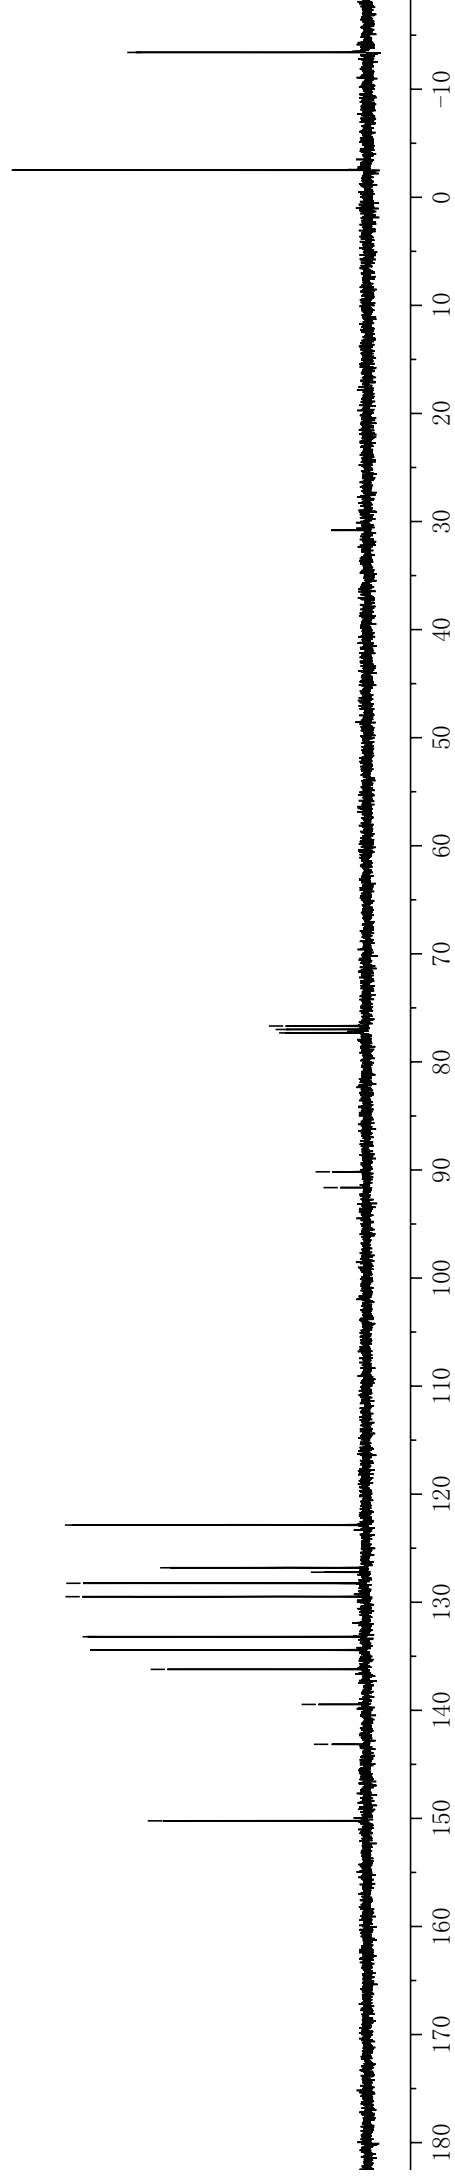

Lin-7-95-2R H1  
CDCI3 400MHZ

8.765  
8.576  
8.564  
7.817  
7.797  
7.597  
7.579  
7.553  
7.535  
7.419  
7.401  
7.381  
7.361  
7.342  
7.333  
7.321  
7.313  
7.301  
7.260

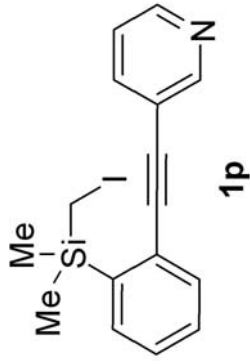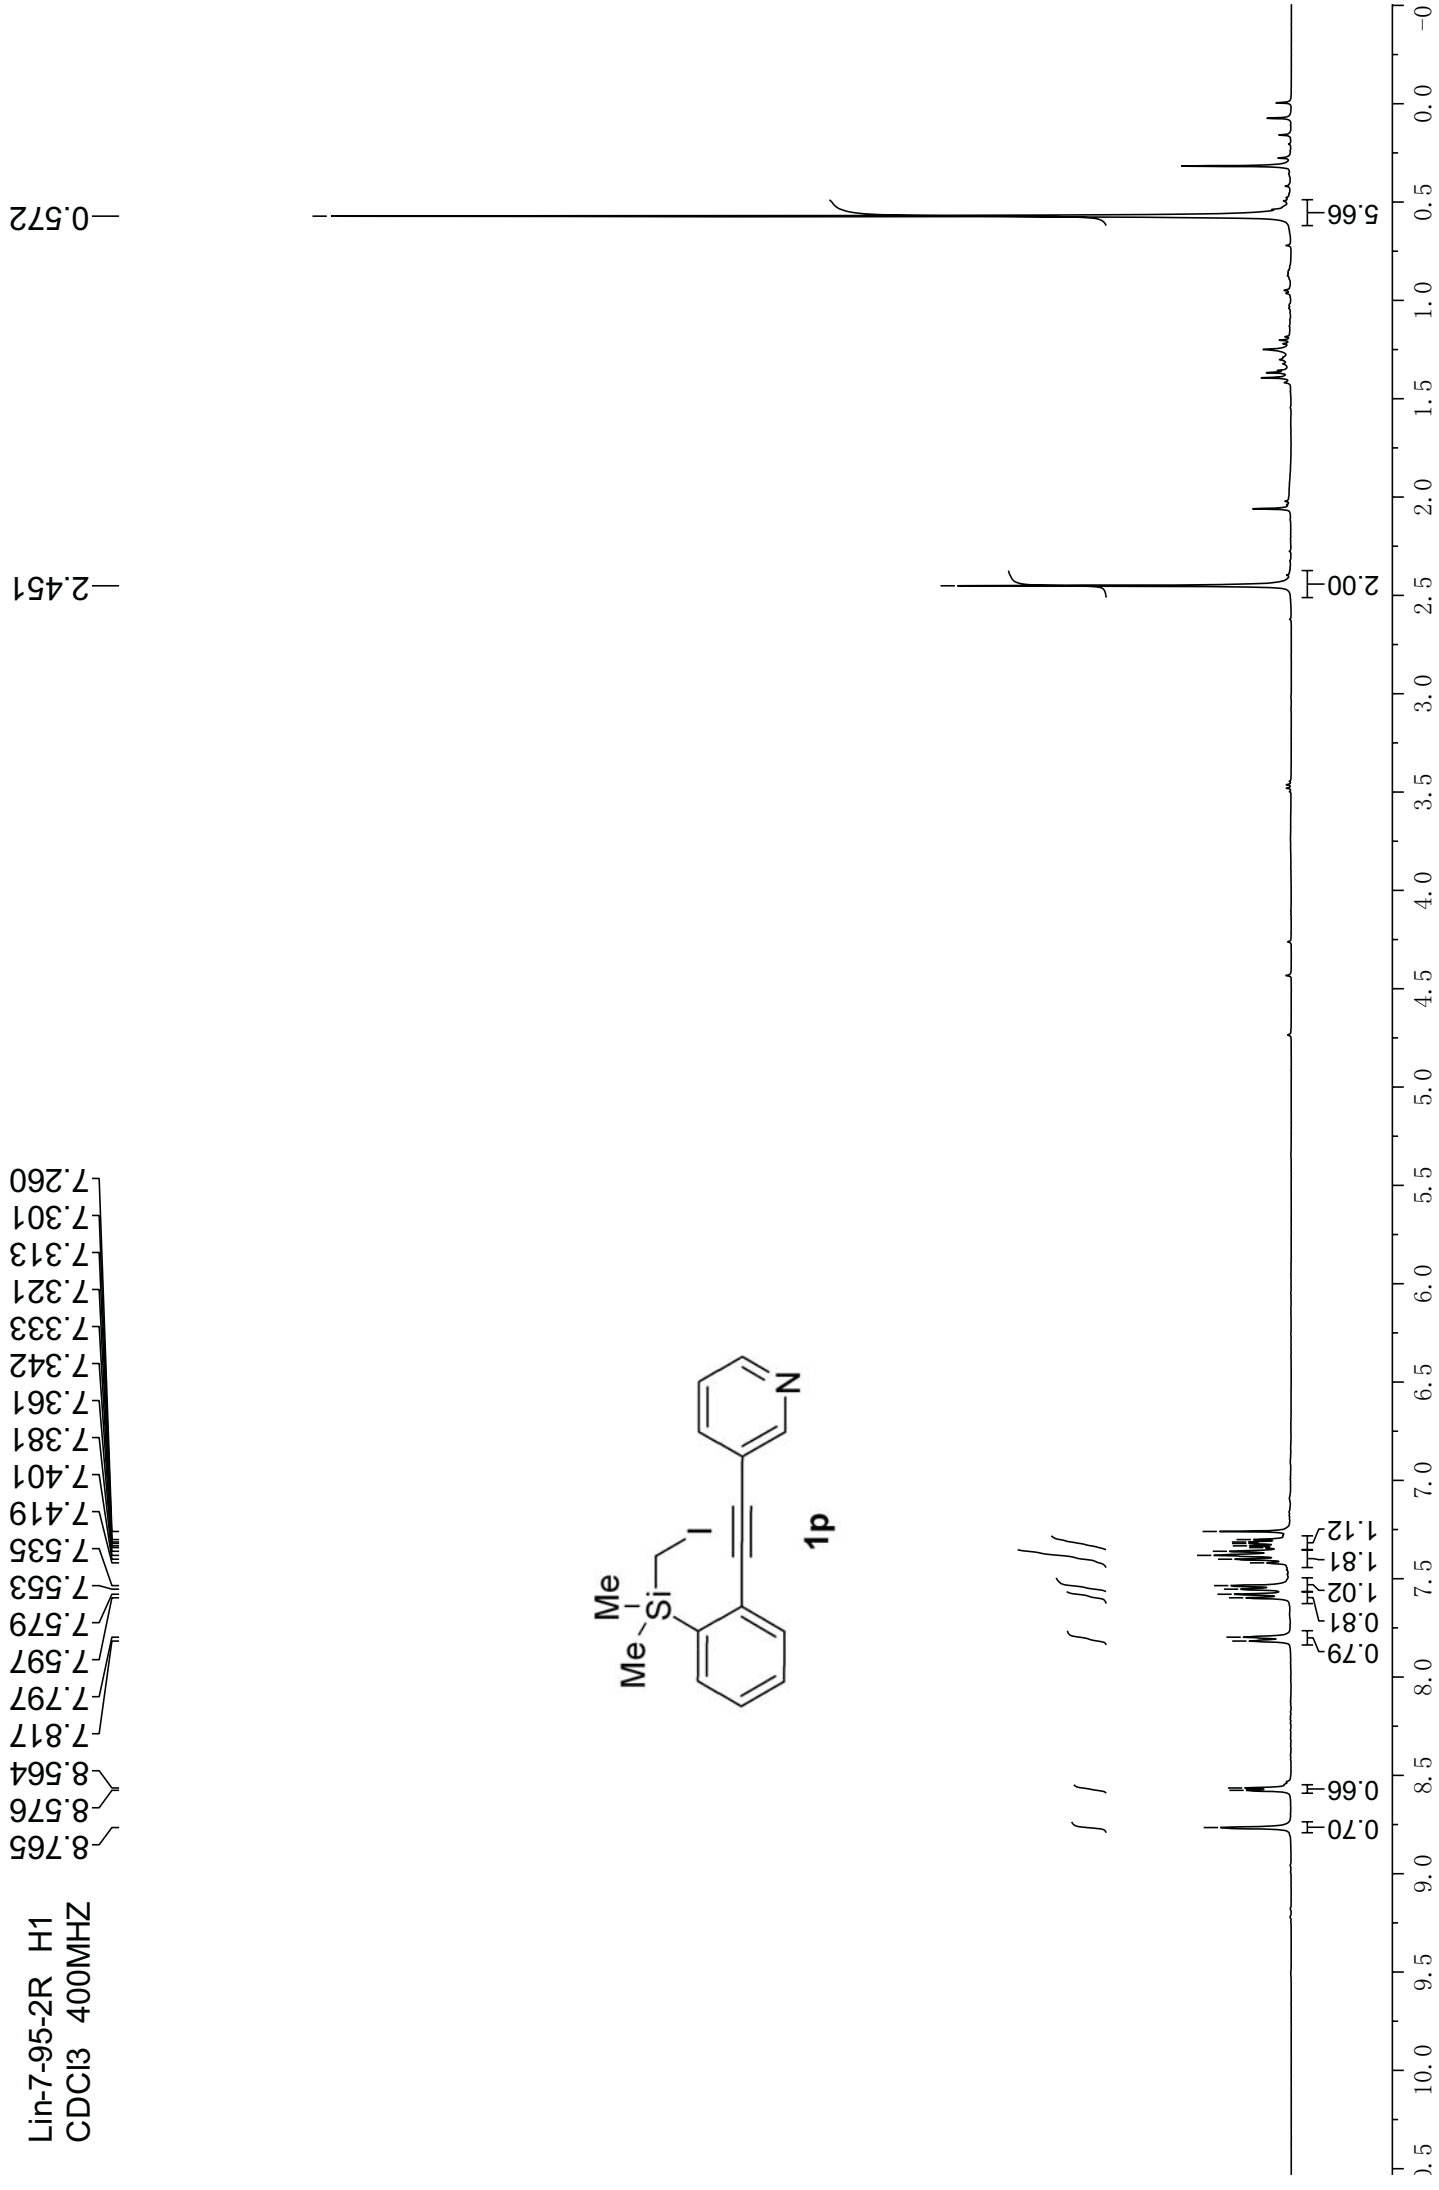

Lin-7-95-2R C13  
CDCI3 100MHZ

- 151.813
- 148.697
- 139.076
- 138.172
- 134.510
- 132.832
- 129.532
- 128.140
- 127.456
- 123.204
- 120.188

- 93.906
- 88.956
- 77.319
- 77.000
- 76.684

- 2.491
- 13.837

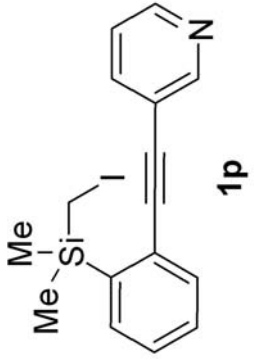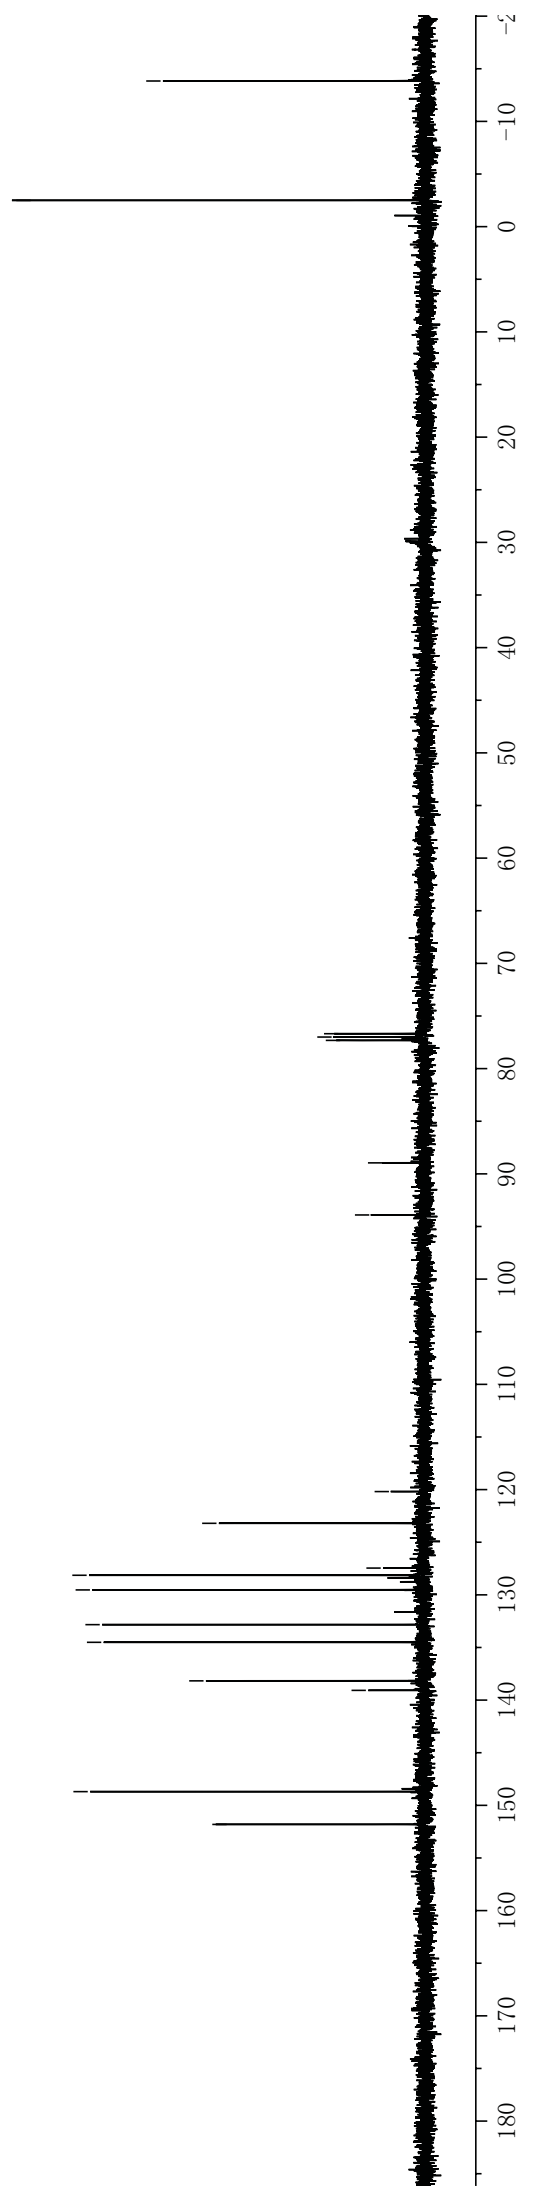

LIn-7-81-4 H1  
CDCl3 400MHZ

7.576  
7.563  
7.556  
7.542  
7.517  
7.506  
7.386  
7.375  
7.260  
7.220  
7.199  
7.092  
7.087  
7.071  
7.067  
7.051

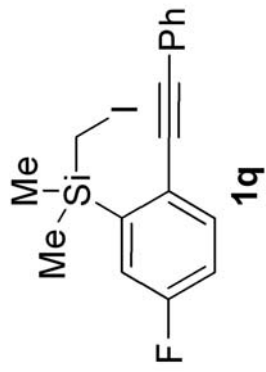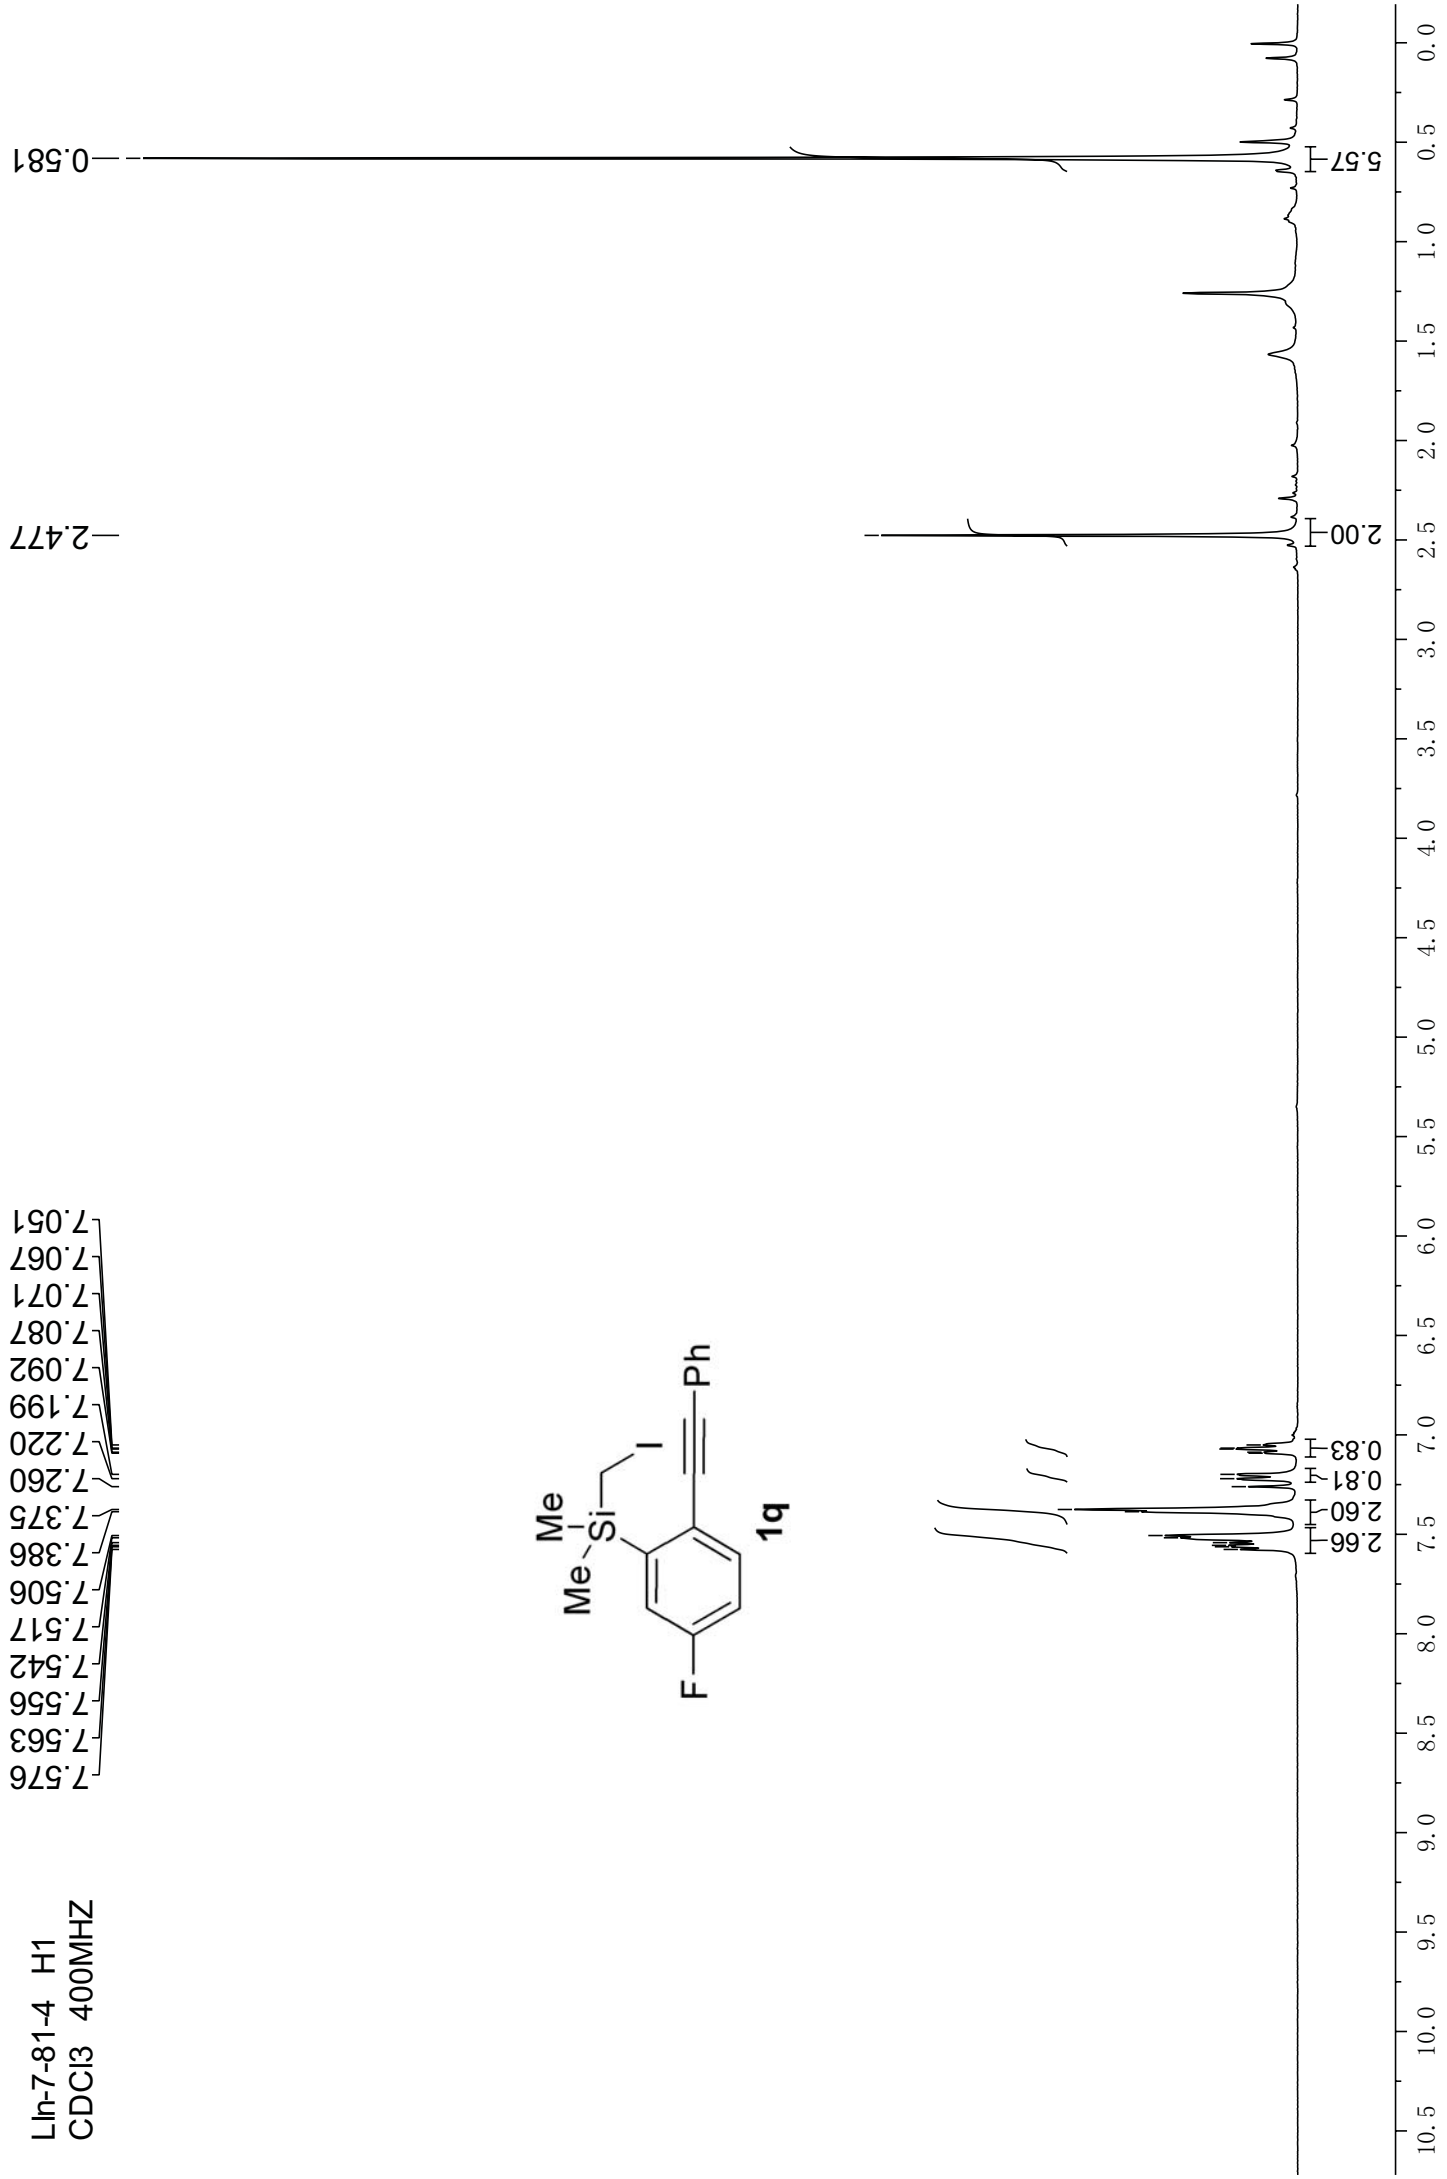

LIn-7-81-4 C13  
CDCI3 100MHZ

163.248  
160.602

142.210  
142.163

134.753  
134.678

131.523  
131.224

128.530  
128.540  
128.344  
128.322  
121.374  
121.175  
116.727  
116.509

92.074  
89.660

77.316  
77.000  
76.671

-2.721

-14.335

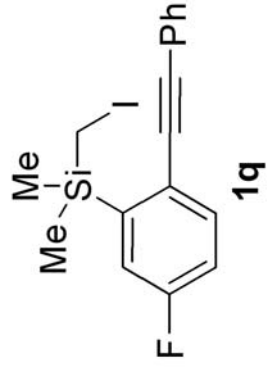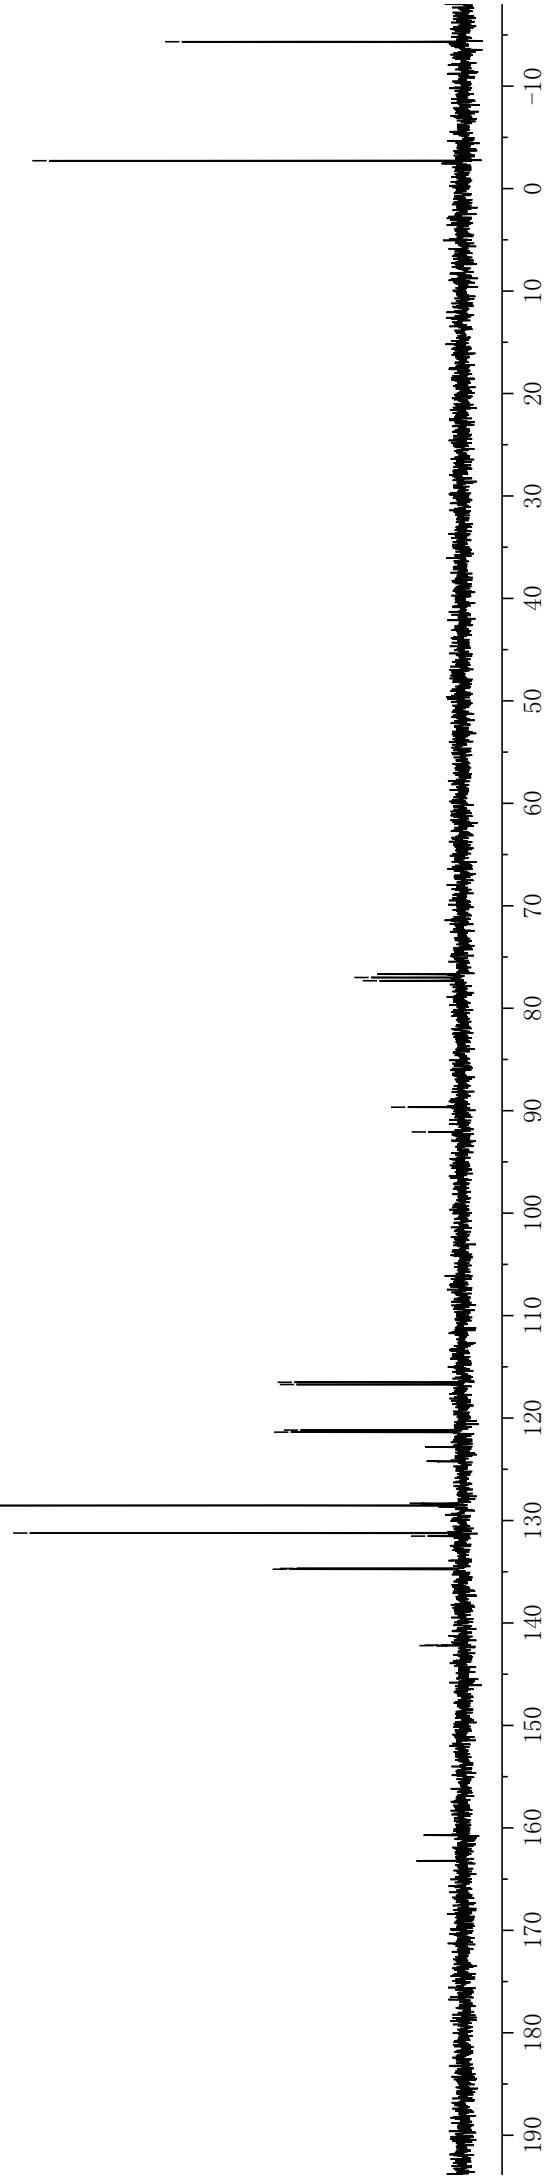

Lin-7-81-1b H1  
CDCI3 400MHZ

7.543  
7.533  
7.461  
7.440  
7.392  
7.381  
7.260  
7.135  
7.131

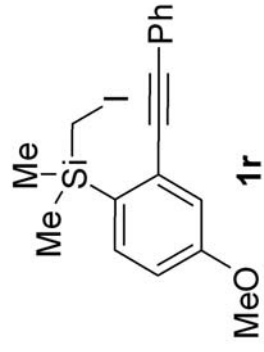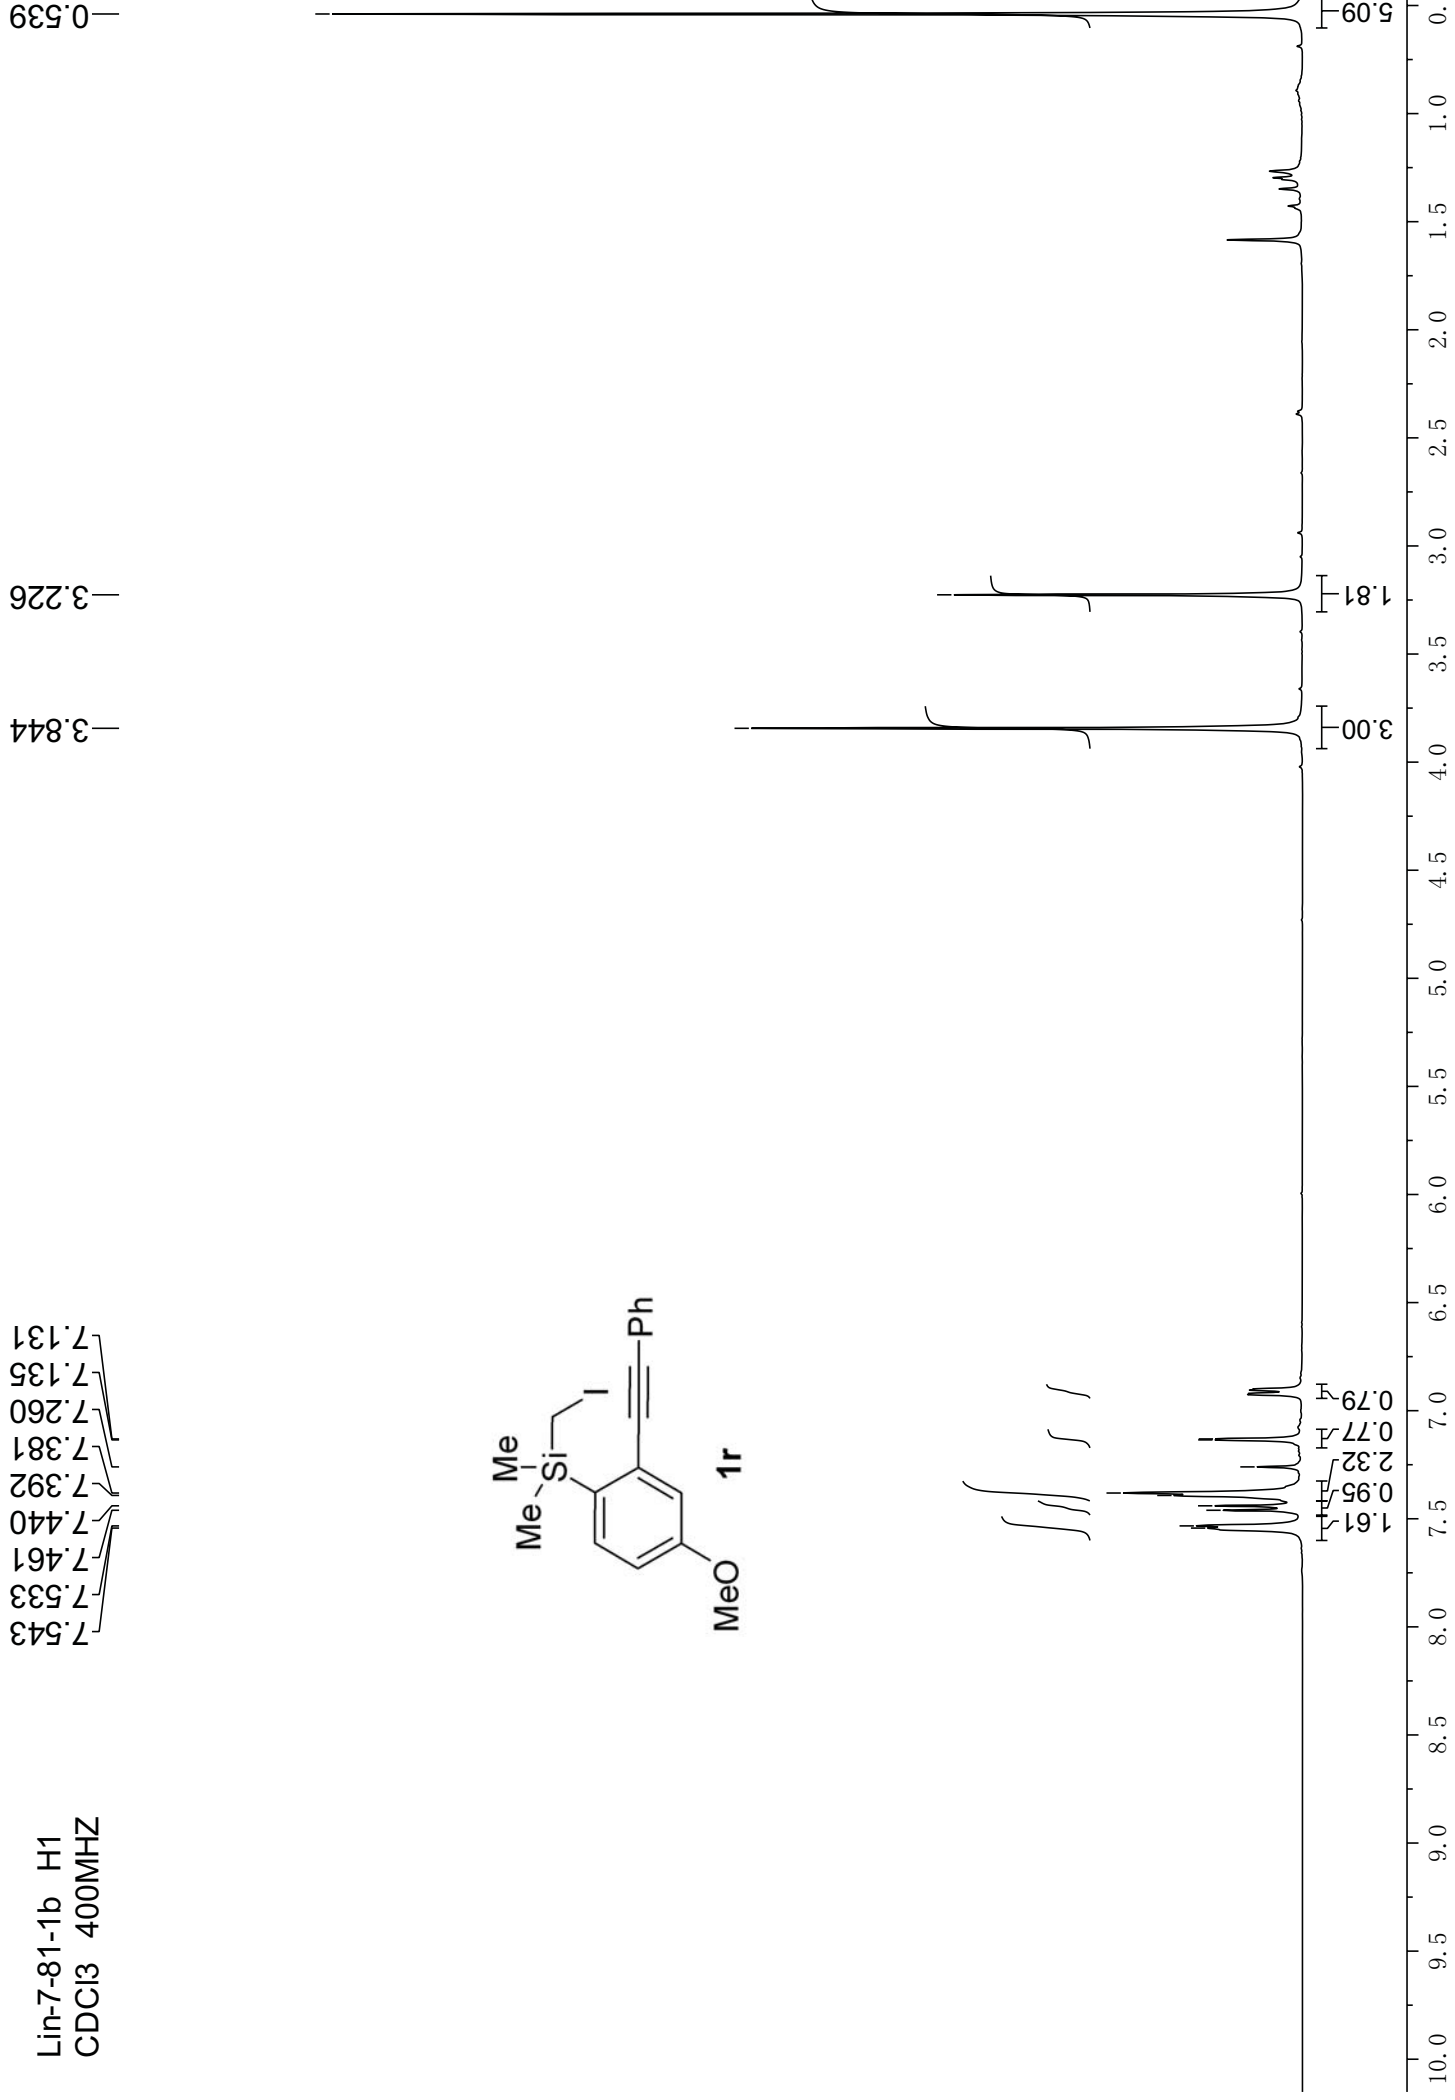



Lin-7-81-1b C13  
CDCI3 100MHZ

160.456  
135.961  
131.341  
129.879  
129.658  
128.542  
128.528  
122.896  
117.700  
114.259  
92.201  
90.522  
77.318  
77.000  
76.682  
55.191  
1.013  
2.408  
12.908

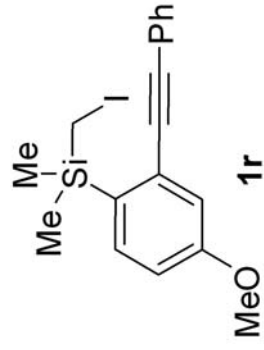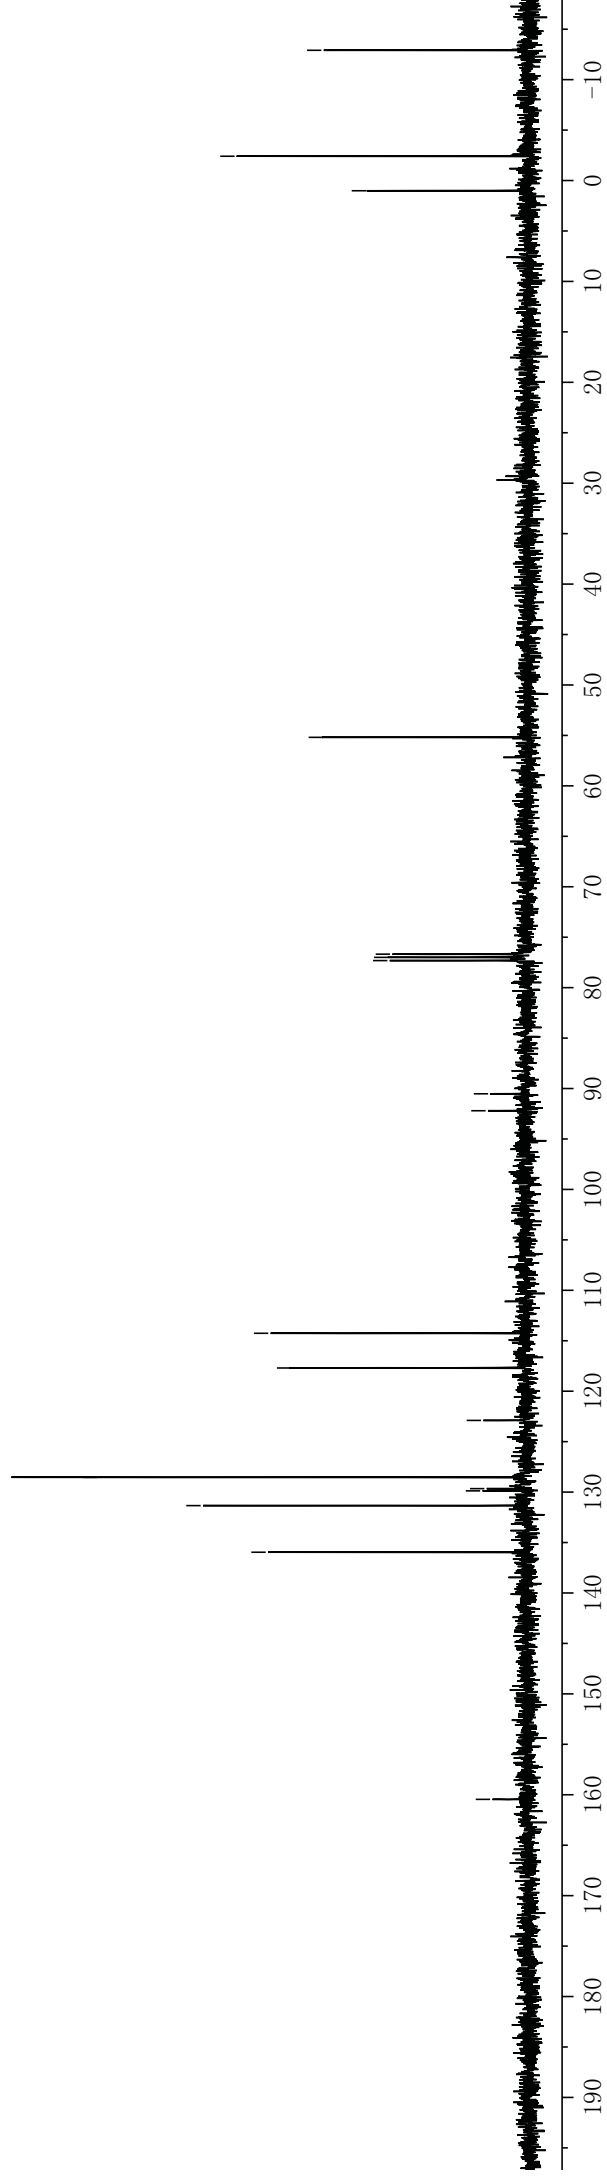

Lin-7-81-2 H1  
CDCI3 400MHZ

7.505  
7.490  
7.375  
7.358  
7.346  
7.328  
7.260  
7.052  
6.968

2.468

0.552

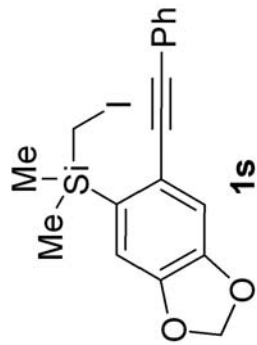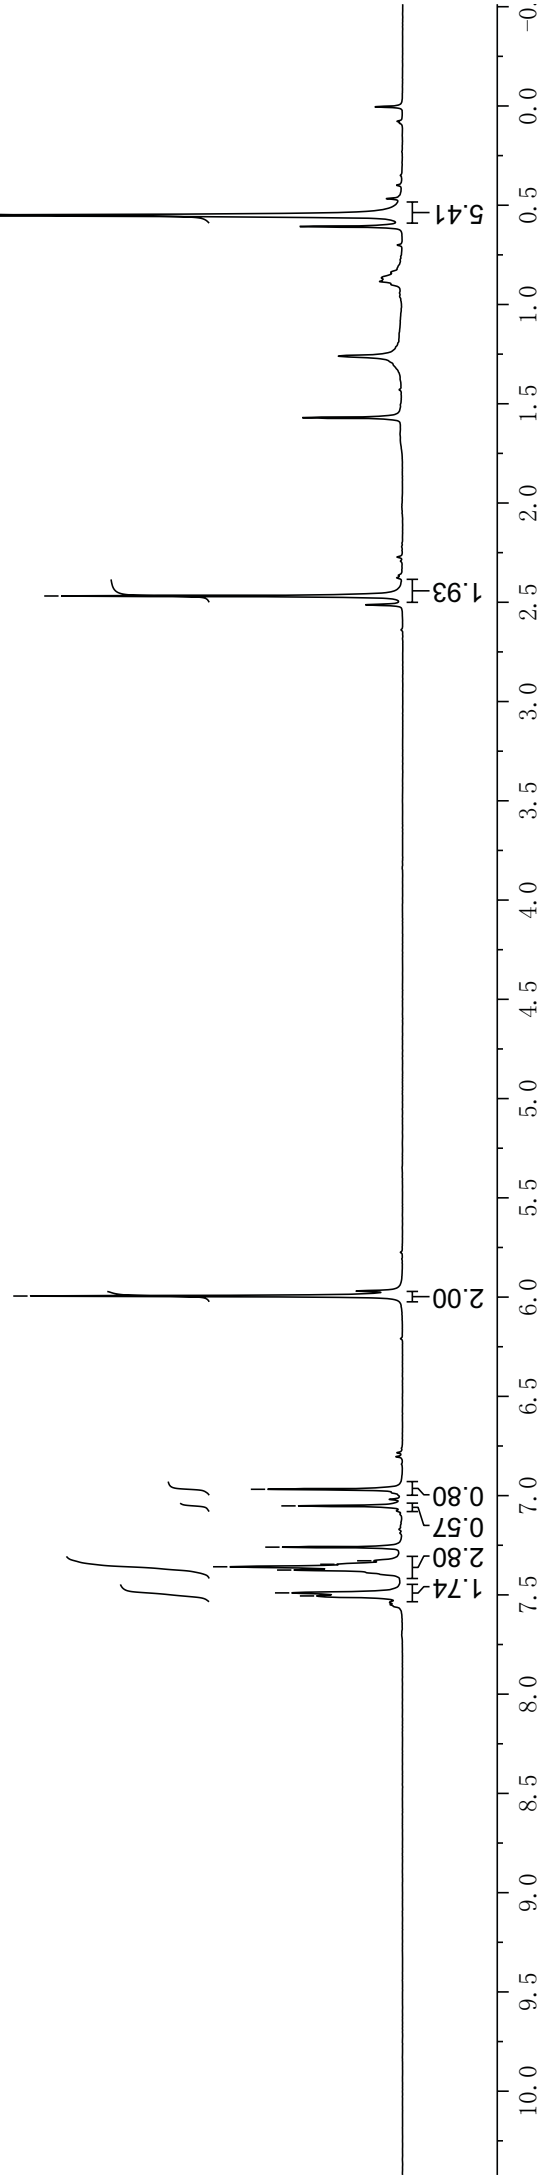

Lin-7-81-2 C13  
CDCI3 100MHZ

148.577  
147.615  
133.096  
131.139  
128.486  
128.283  
123.055  
122.315  
113.850  
113.040  
101.256  
91.168  
90.547  
77.317  
77.000  
76.681  
-2.416  
-13.320

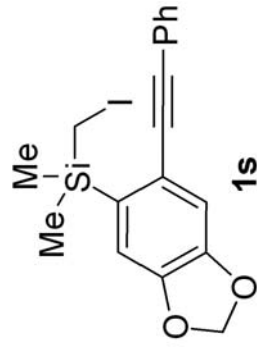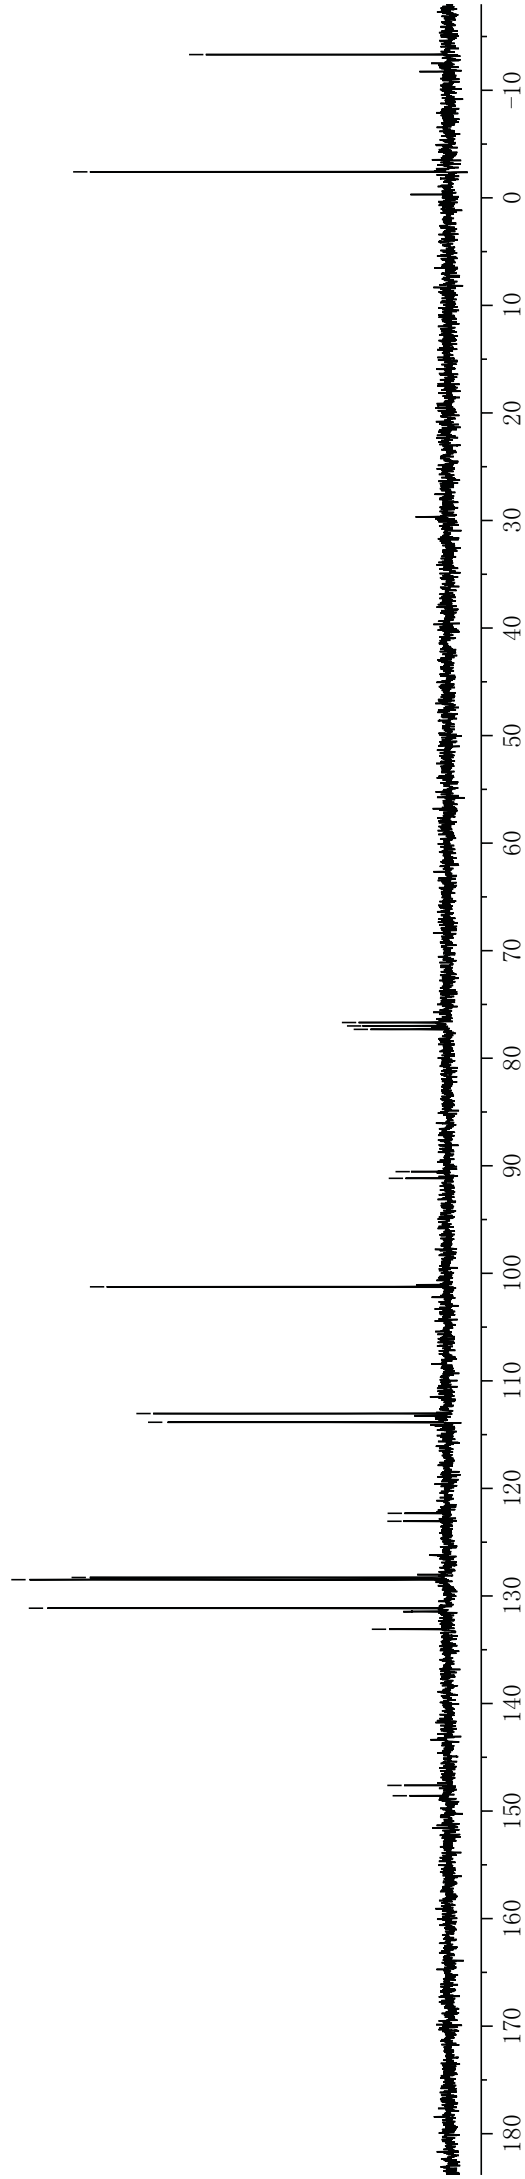

Lin-7-53-1a H1  
CDCI3 400MHZ

7.684  
7.666  
7.646  
7.628  
7.549  
7.530  
7.512  
7.496  
7.479  
7.461

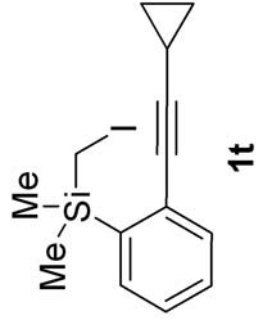

2.641  
1.723  
1.715  
1.702  
1.690  
1.682  
1.670  
1.134  
1.125  
1.114  
1.106  
1.071  
1.060  
1.050  
0.726

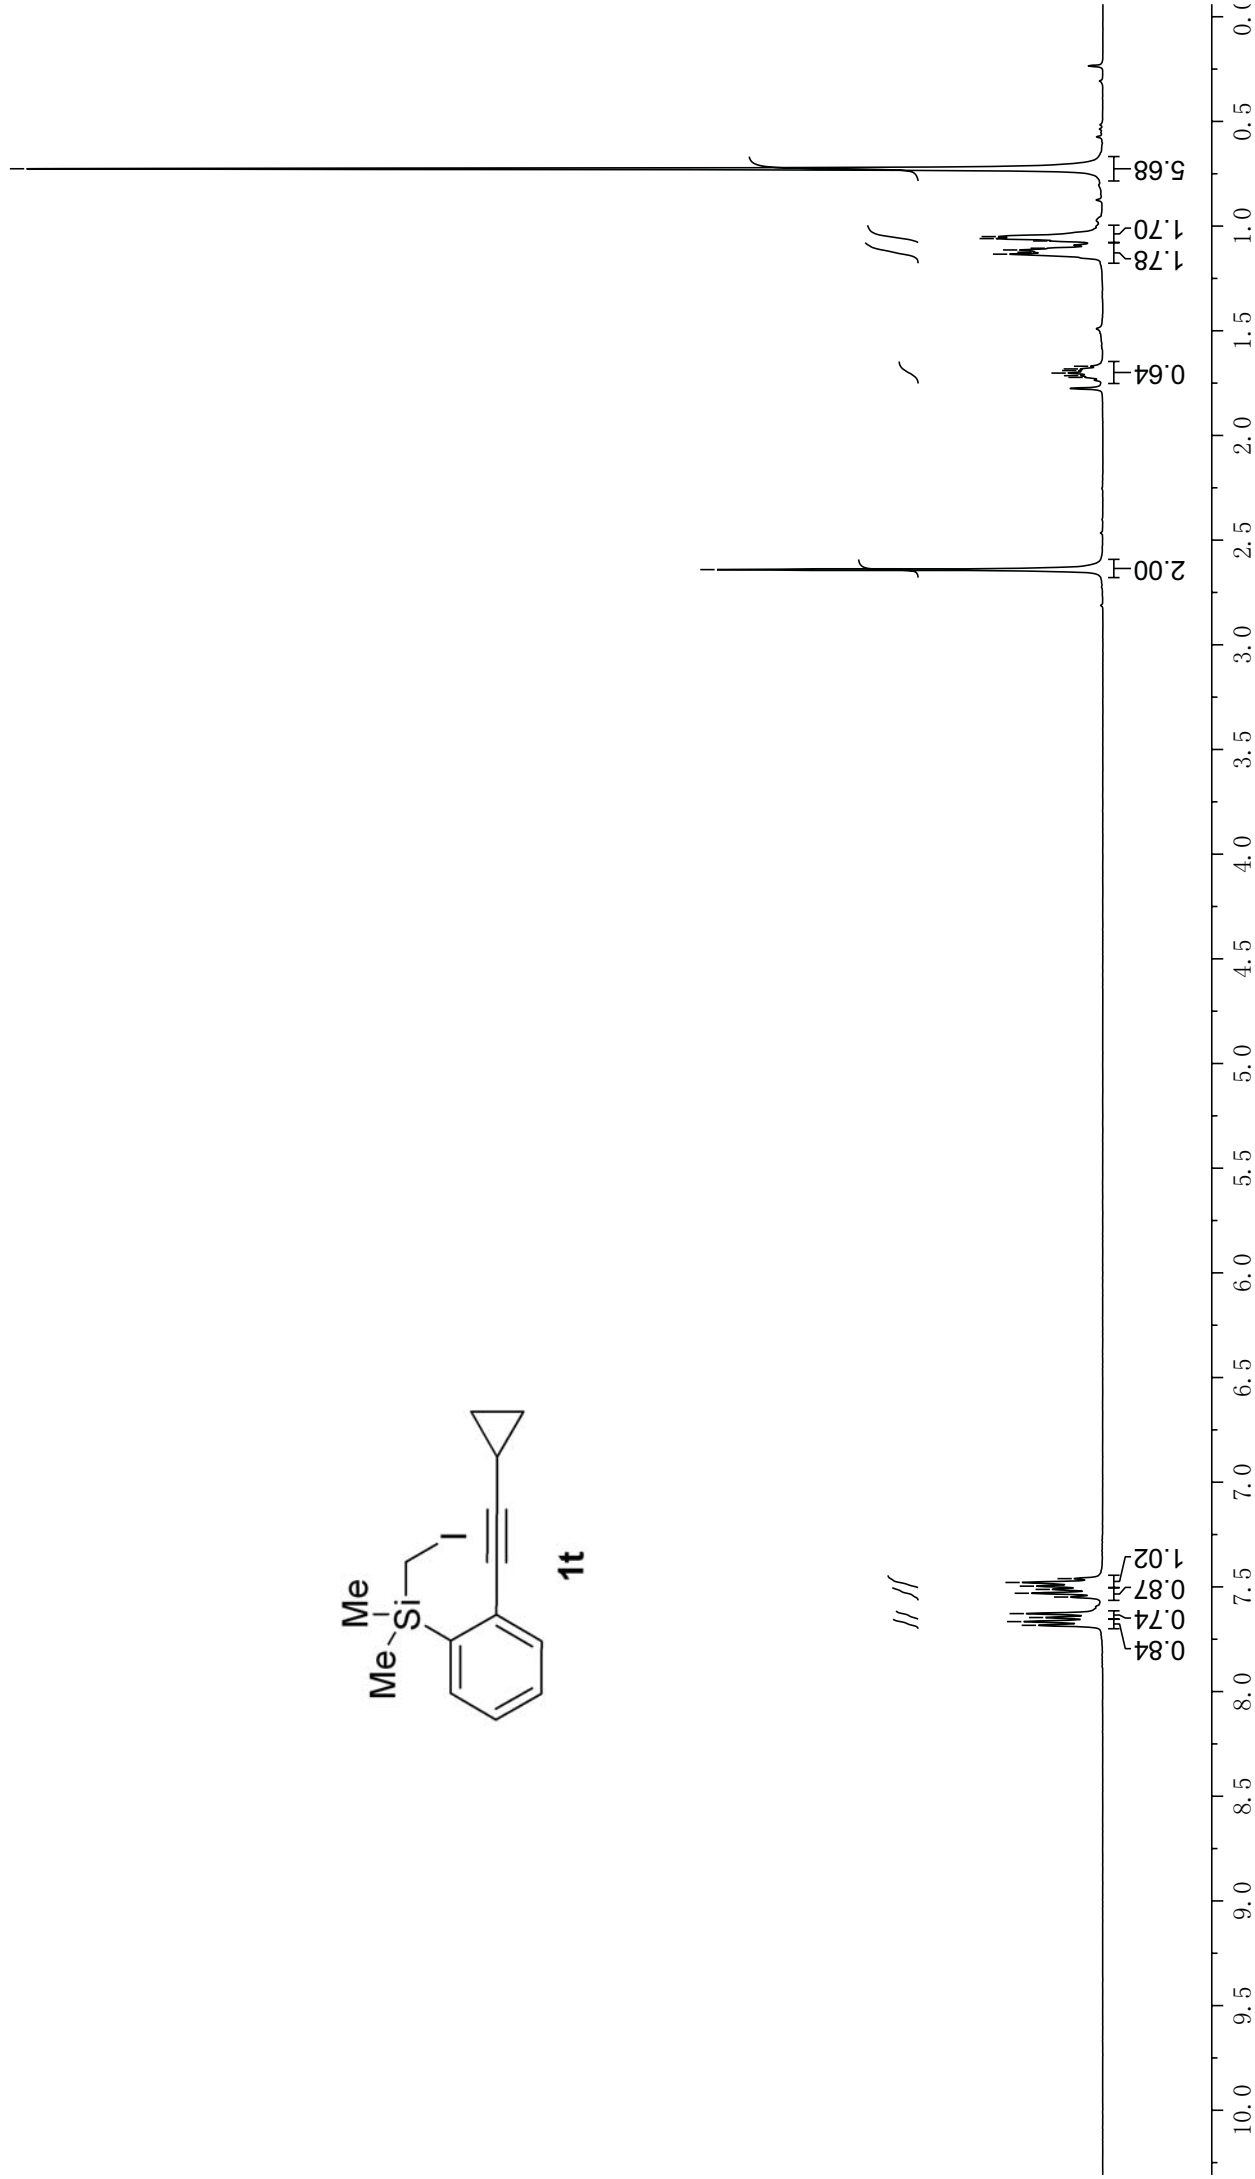

Lin-7-53-1a C13  
CDCI3 100MHZ

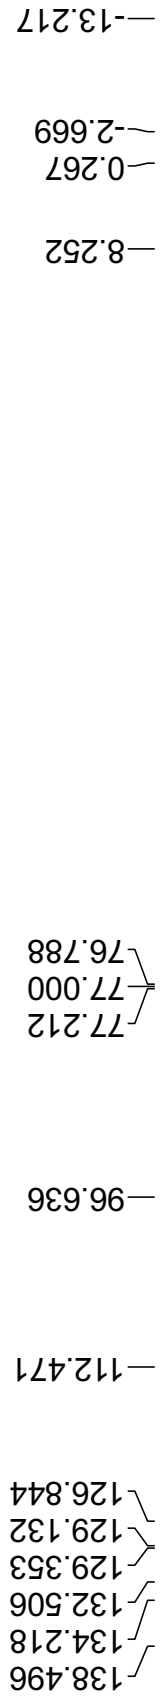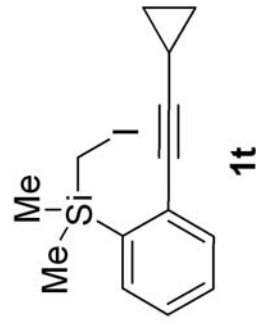

Lin-7-57-1R H1  
CDC13 400MHZ

7.628  
7.609  
7.534  
7.516  
7.343  
7.325  
7.306  
7.260  
7.223  
7.205  
7.187  
6.154  
6.136  
6.119

2.270  
2.251  
2.234  
2.215  
1.716  
1.508  
1.490  
1.472  
0.986  
0.968  
0.950  
0.305

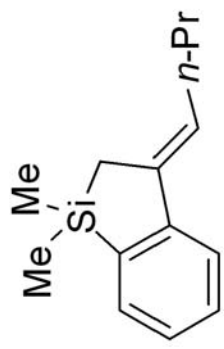

2a

|||

|||

1.04  
0.95  
1.10  
0.97

1.00

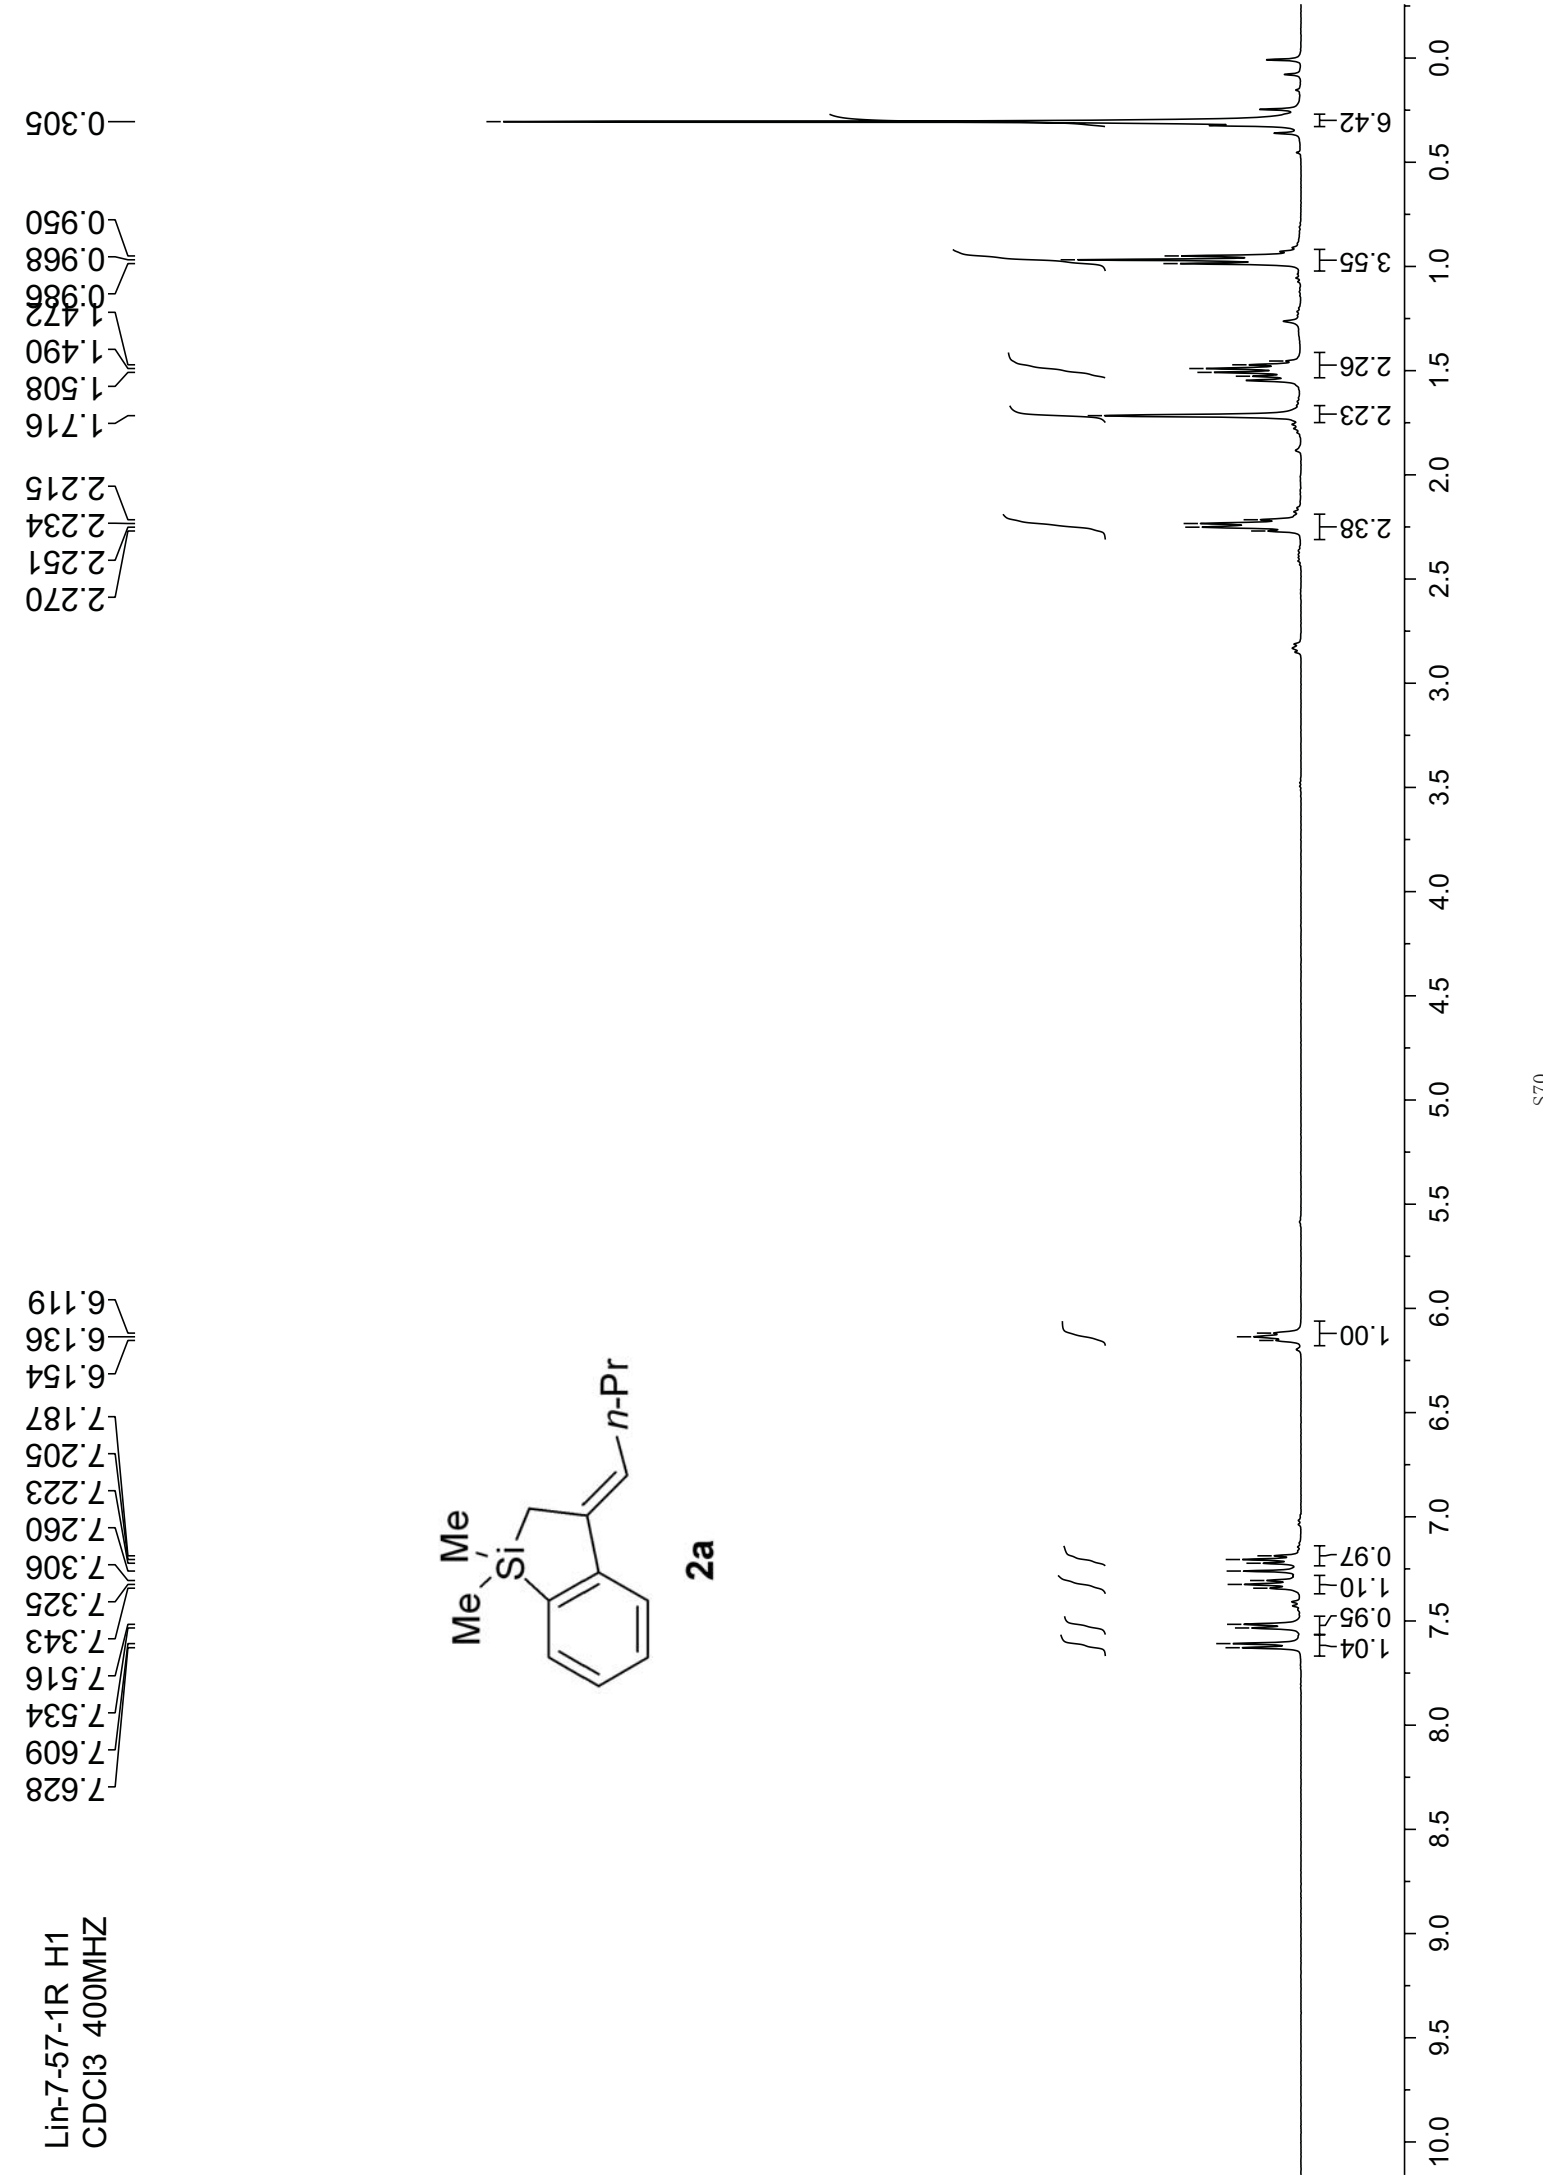

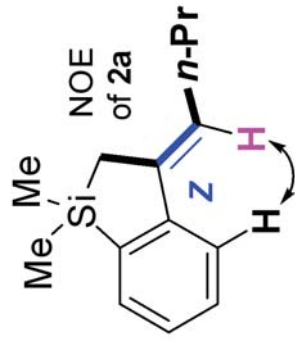

6.128

7.621  
7.601

2.262  
2.246  
2.228  
1.521  
1.502  
1.484  
1.466

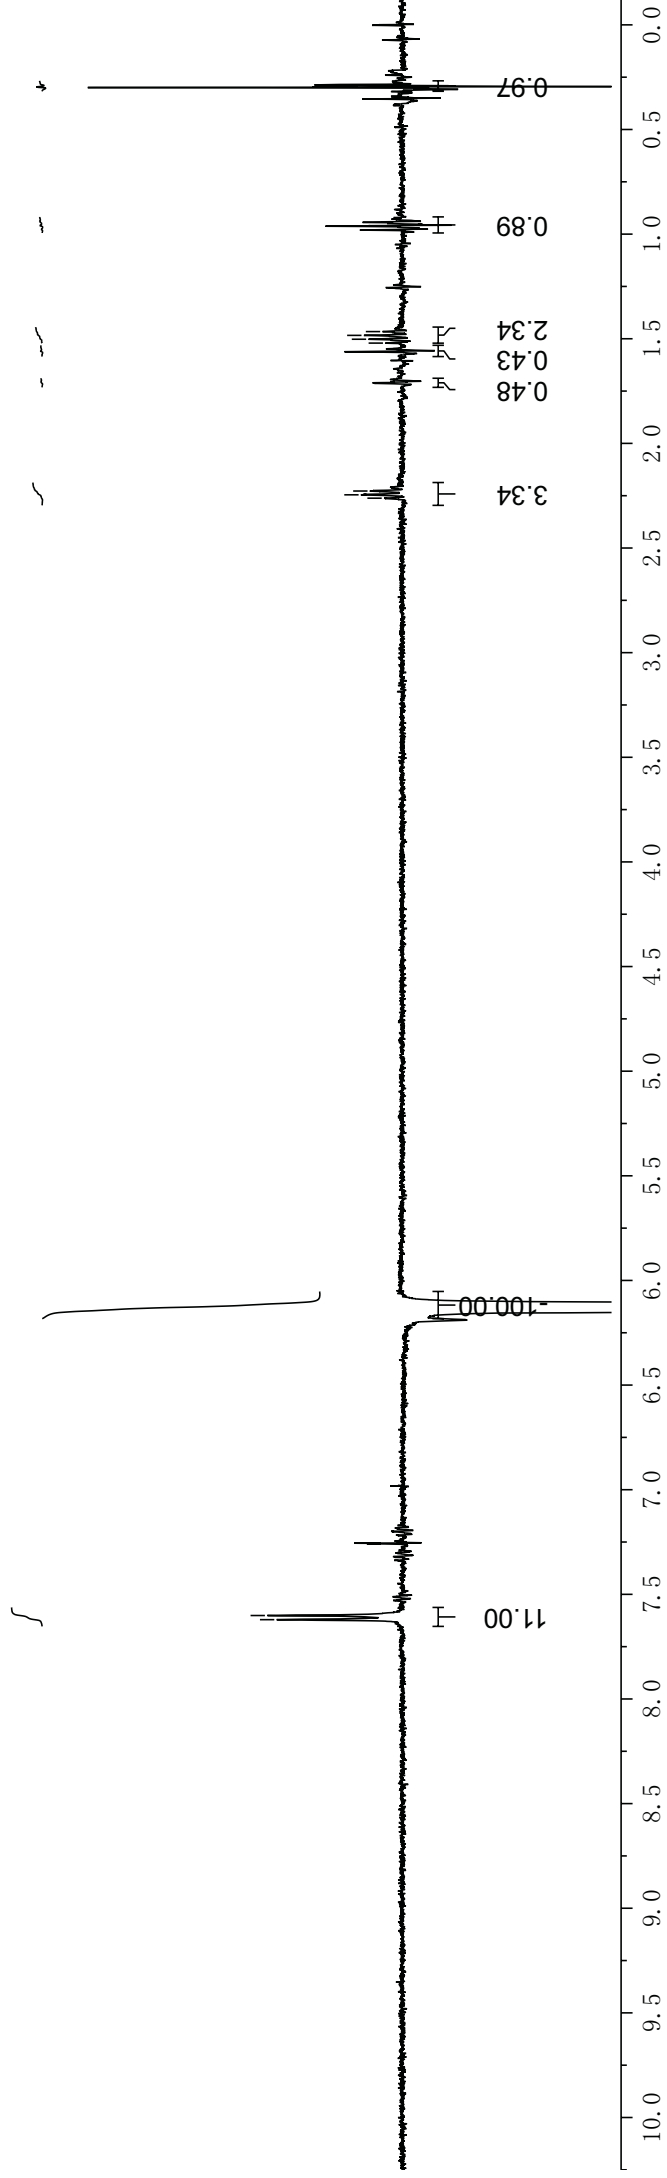

Lin-7-44-1a C13  
CDCB 150MHZ

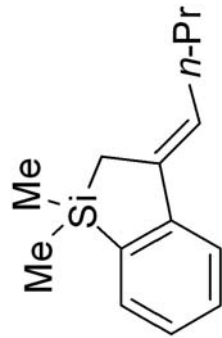

2a

77.212  
77.000  
76.789

150.573  
140.654  
139.742  
132.113  
129.517  
126.547  
124.345  
121.057

31.688

22.747  
16.250  
13.977

-1.783

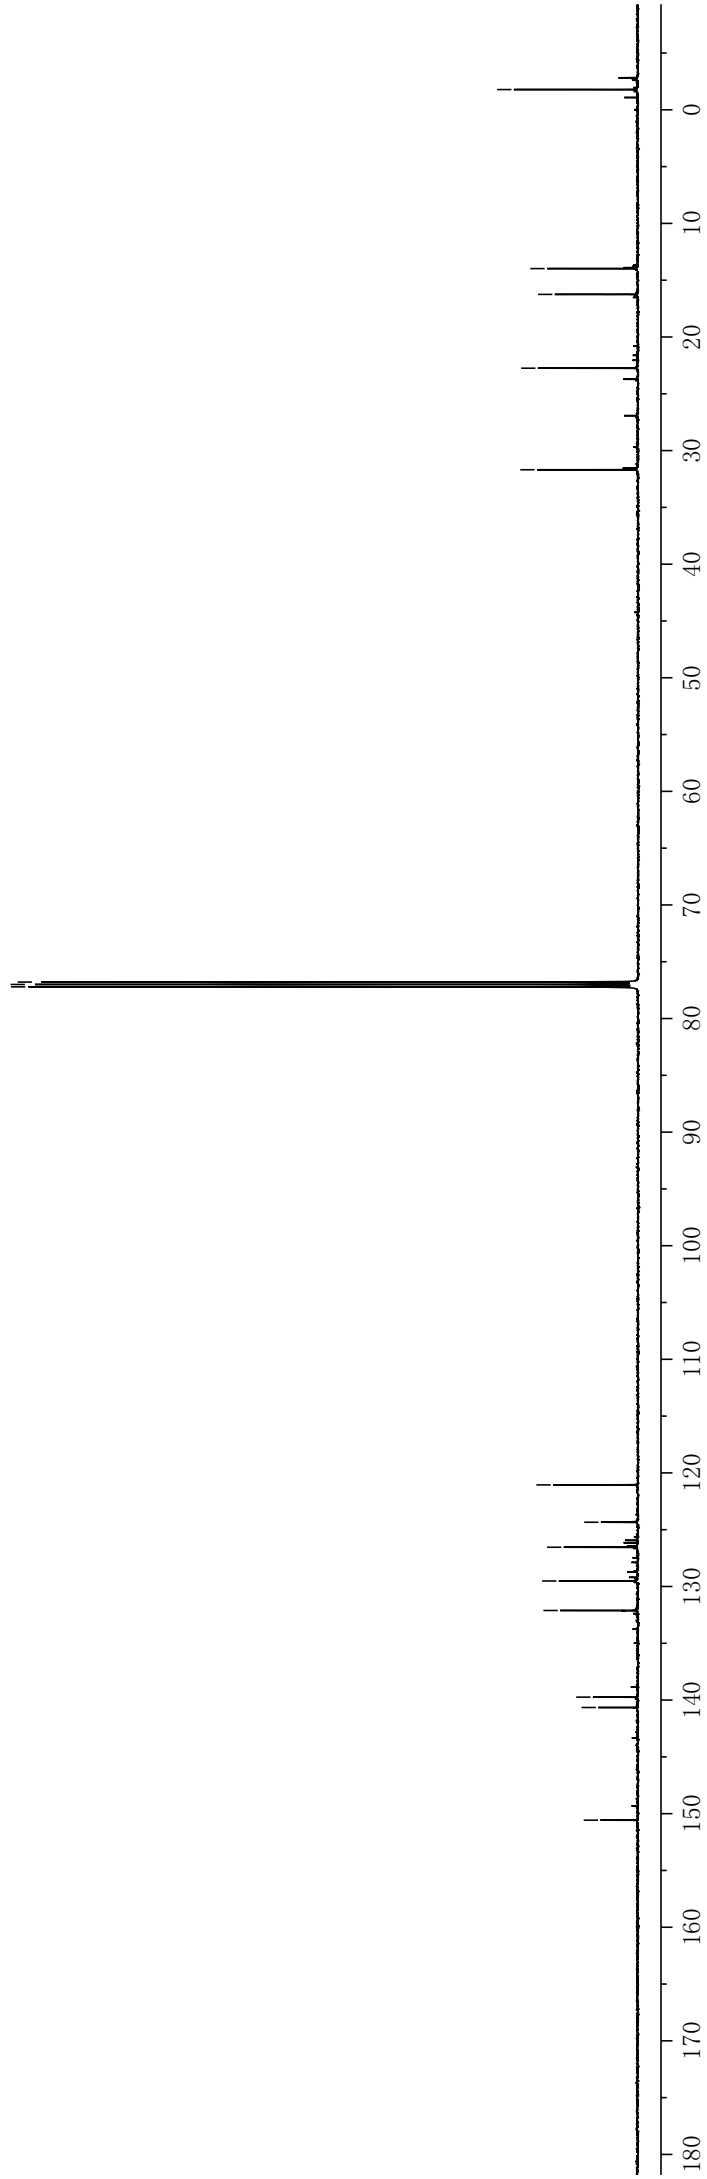



Lin-7-104-3 H1  
CDCI3 400MHZ

7.623  
7.604  
7.548  
7.530  
7.354  
7.335  
7.316  
7.260  
7.235  
7.217  
7.199  
6.265  
6.248  
6.231  
6.214  
5.743  
5.725  
1.979  
1.963  
1.881  
1.864  
1.714  
0.326  
0.026

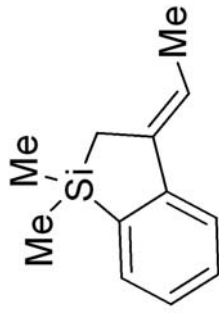

2b

Z-isomer E-isomer

■ ●

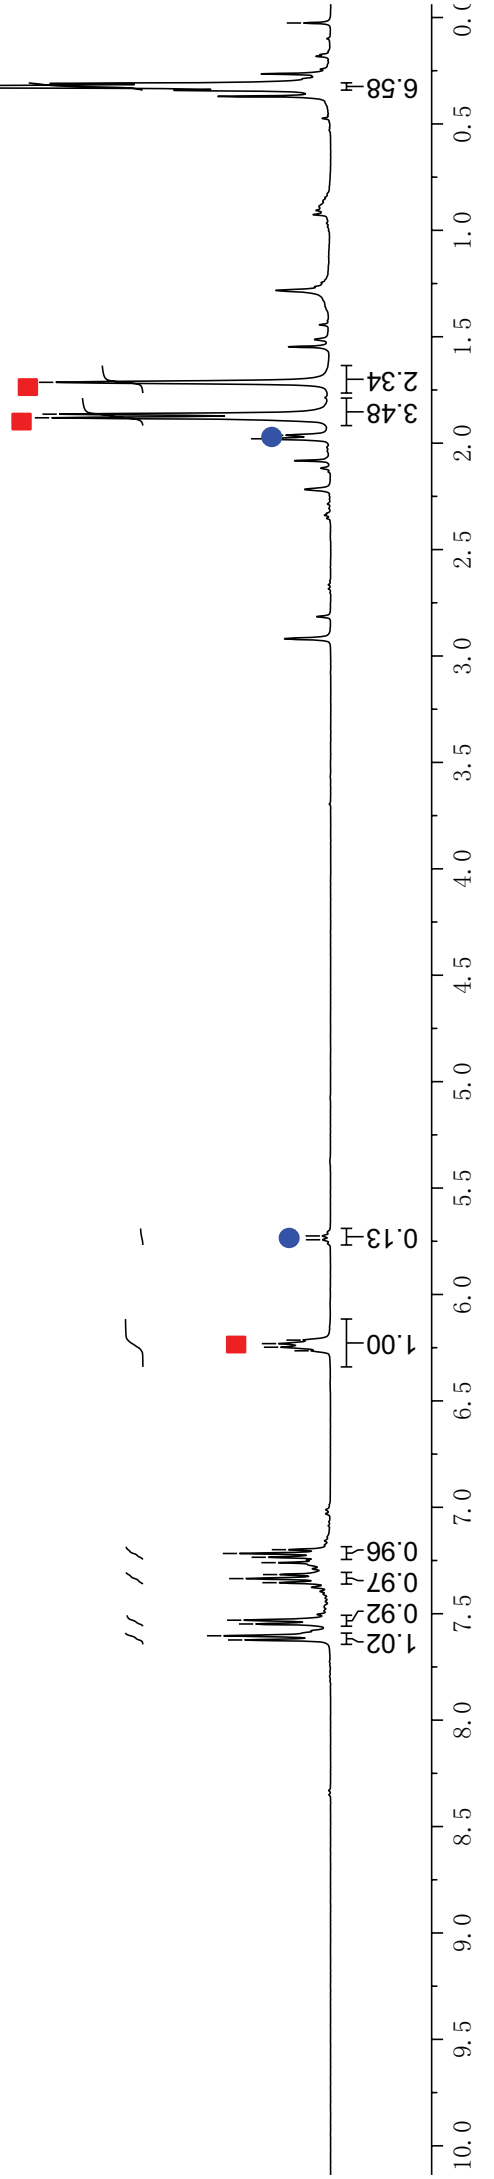

Lin-7-104-3 C13  
CDC13 100MHZ

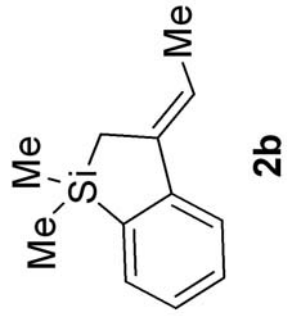

150.427  
140.630  
140.577  
132.137  
129.537  
126.520  
120.943  
118.313  
77.318  
77.000  
76.683  
15.799  
15.024  
-1.691

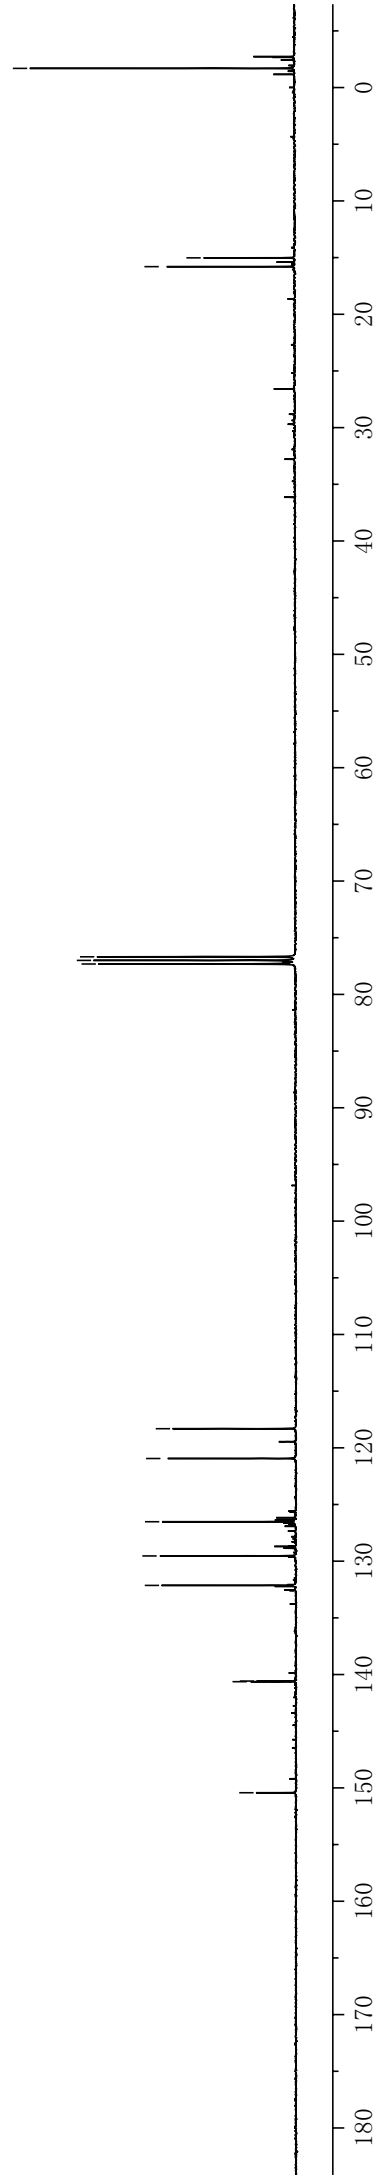



Lin-7-91-4 C13  
CDCI3 100MHZ

150.596  
140.631  
139.538  
132.113  
129.518  
126.526  
124.623  
121.055

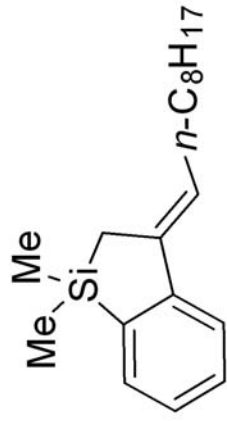

2c

77.318  
77.000  
76.683

31.909  
29.590  
29.557  
29.472  
29.344  
22.680  
16.212  
14.103

1.786  
2.811

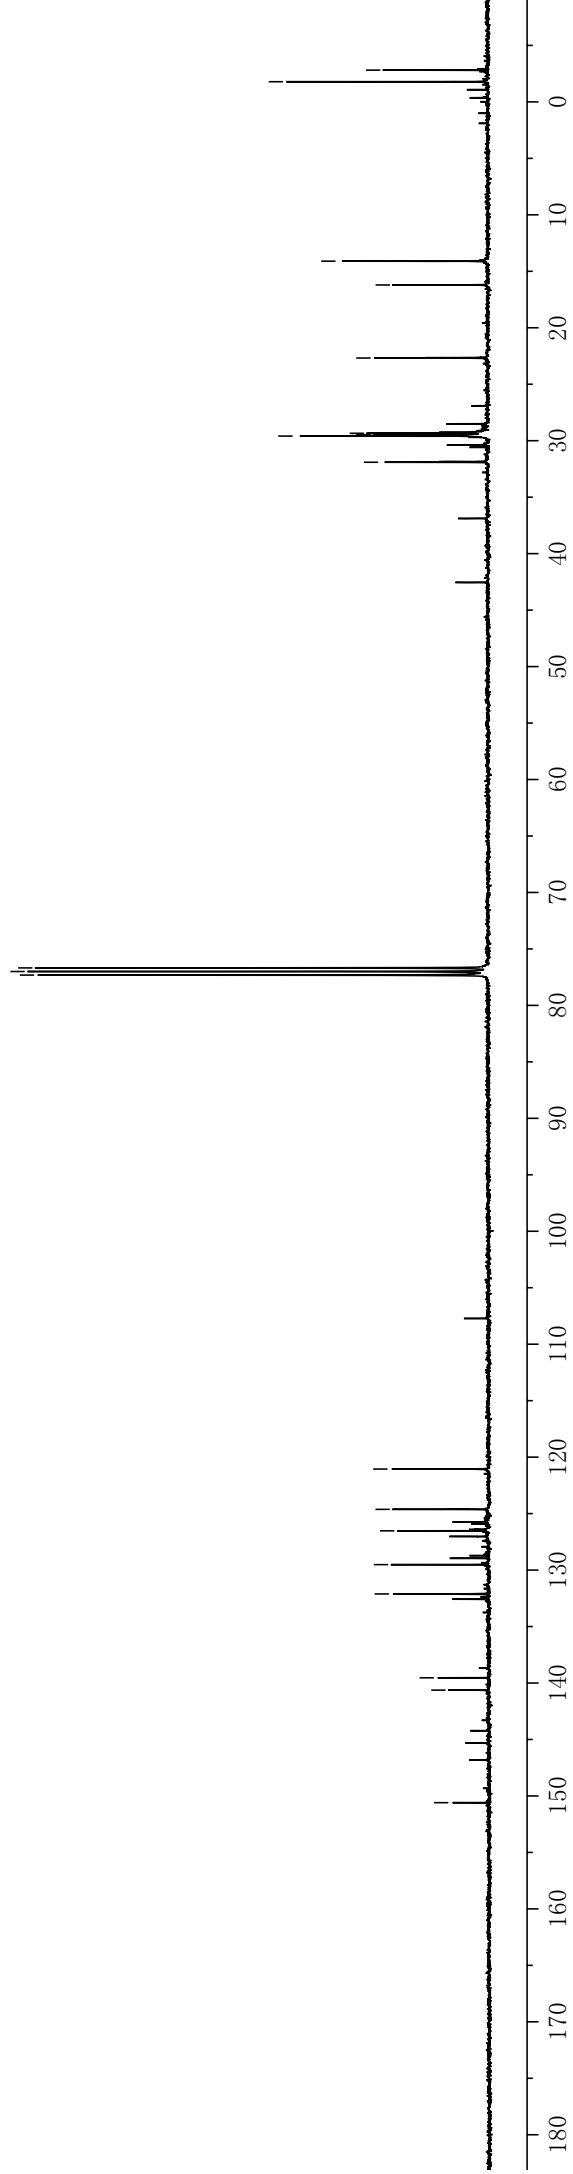

Lin-7-66-3R H1  
CDCI3 400MHZ

7.676  
7.656  
7.546  
7.528  
7.364  
7.362  
7.345  
7.327  
7.268  
7.260  
7.251  
7.233  
6.276  
6.260  
6.243  
4.709  
4.701  
4.691  
4.515  
4.500  
4.484  
4.469  
4.361  
4.342  
4.329  
4.311  
3.964  
3.943  
3.916  
3.553  
3.540  
3.526  
1.881  
1.858  
1.775  
1.753  
1.745  
1.631  
1.594  
1.580  
1.563  
0.309

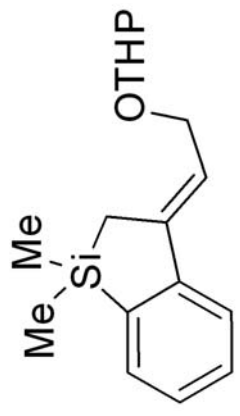

2d

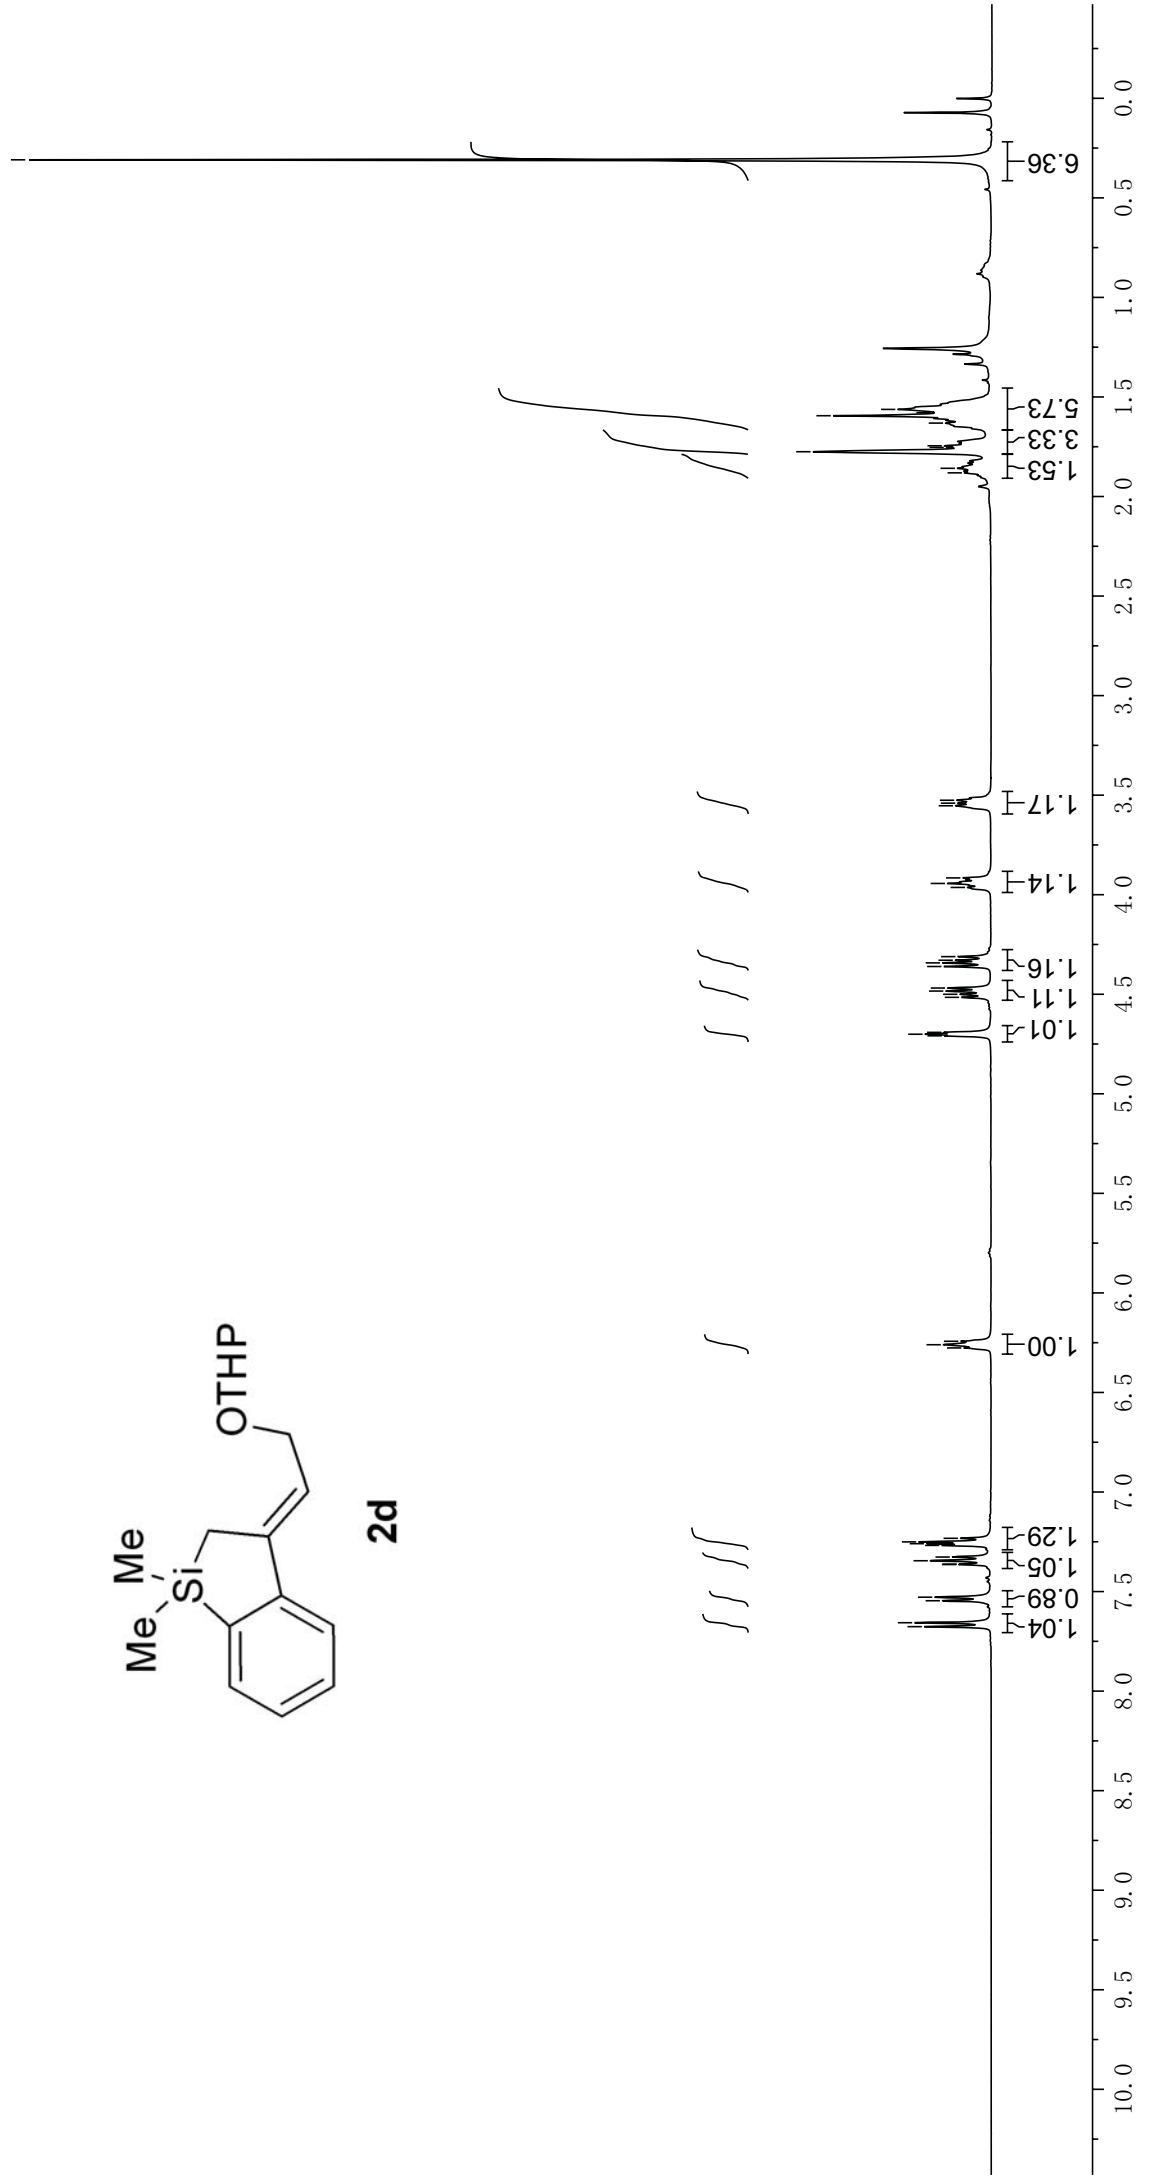

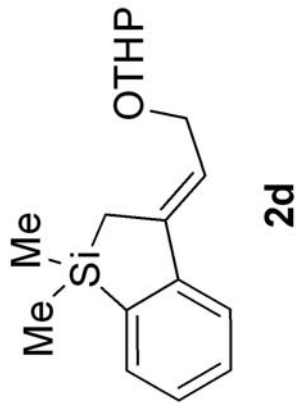

Lin-7-66-3R C13  
CDCI3 100MHZ

~149.607  
~143.239  
~141.226  
~132.089  
~129.619  
~127.407  
~121.726  
~119.673

— 97.897

~77.318  
~77.000  
~76.683

— 65.132  
— 62.398

~30.754  
~25.497  
~19.640  
~16.351

~1.799  
~1.838

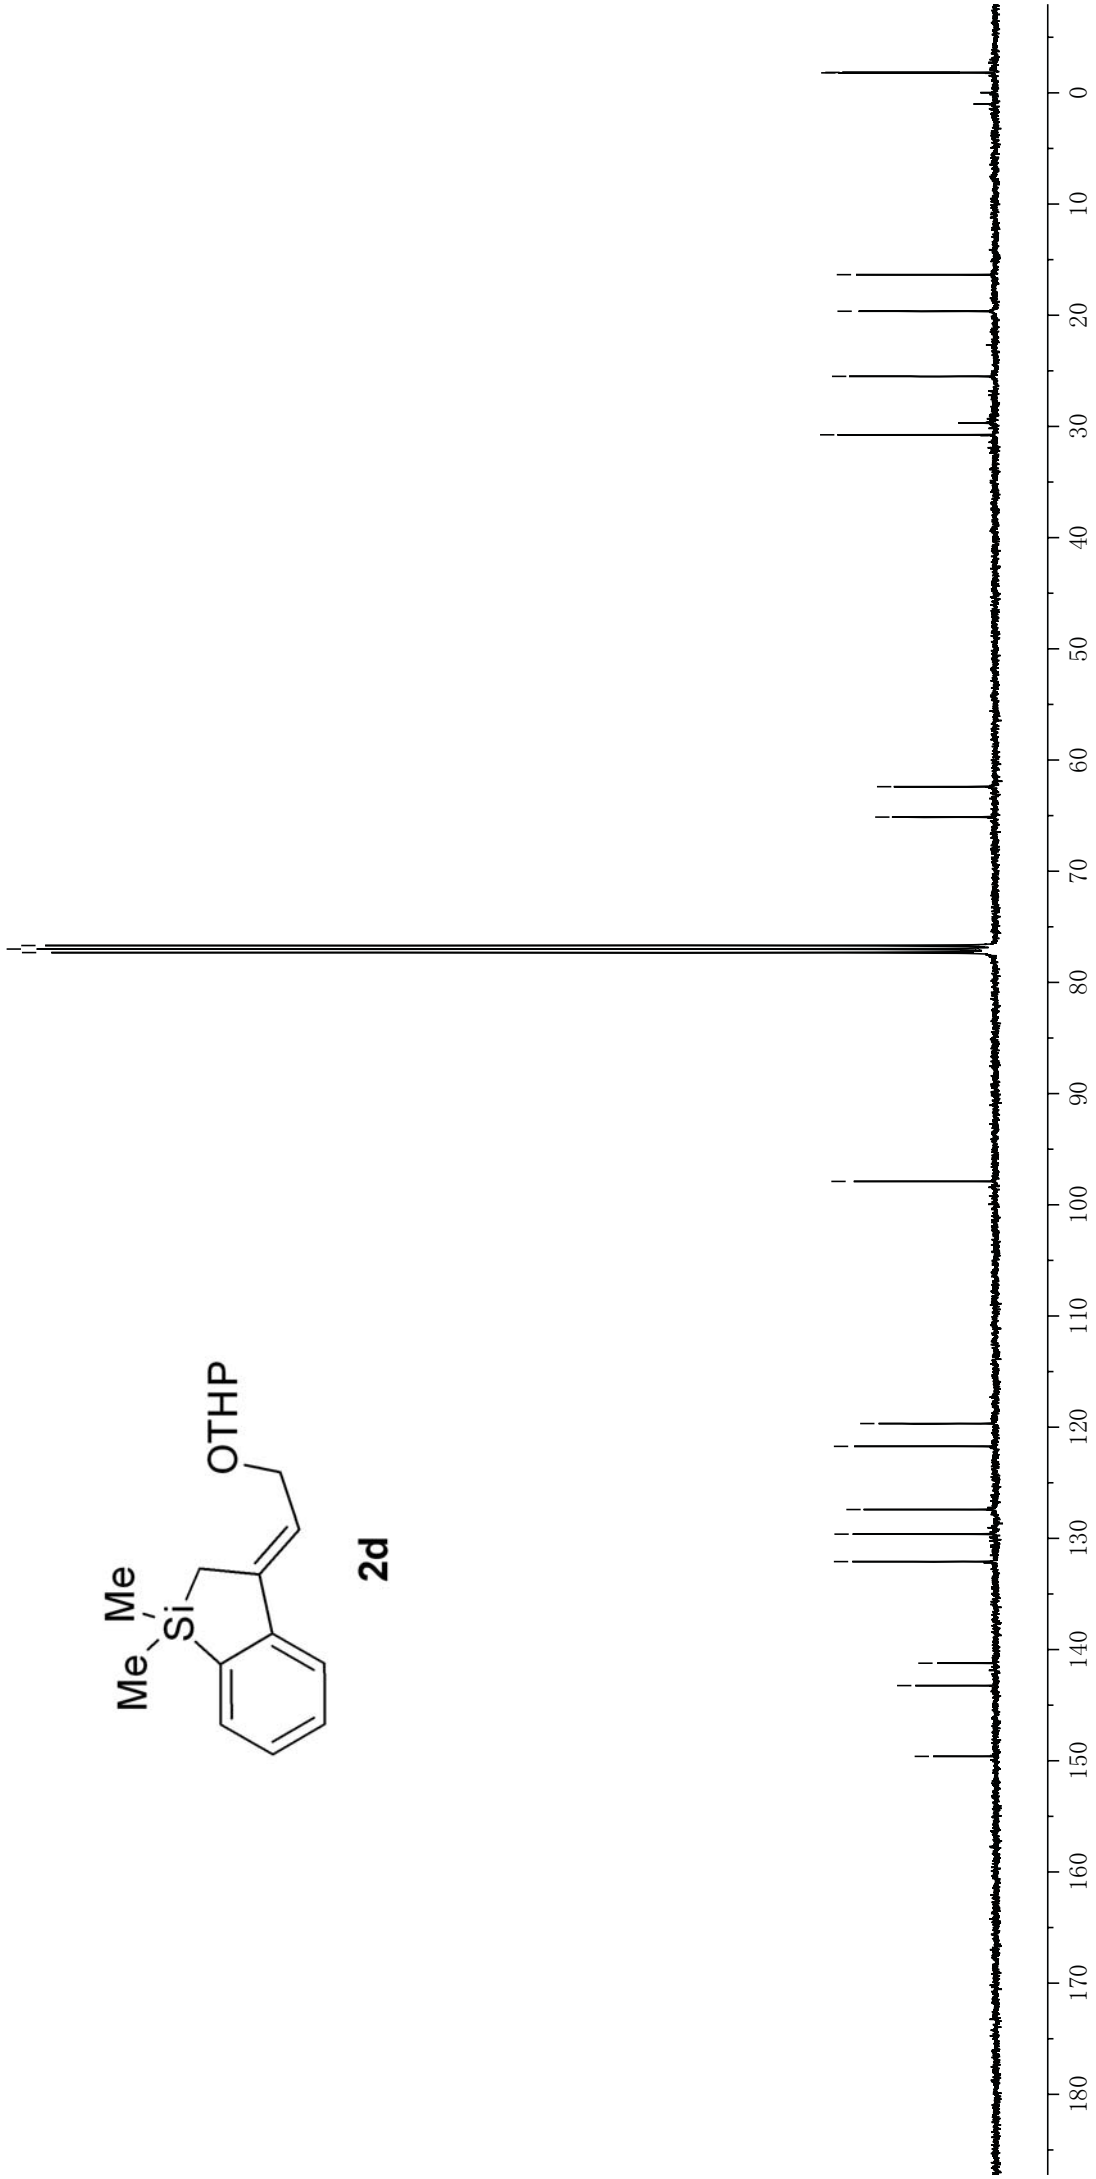

Lin-7-66-1R H1  
CDCI3 400MHZ

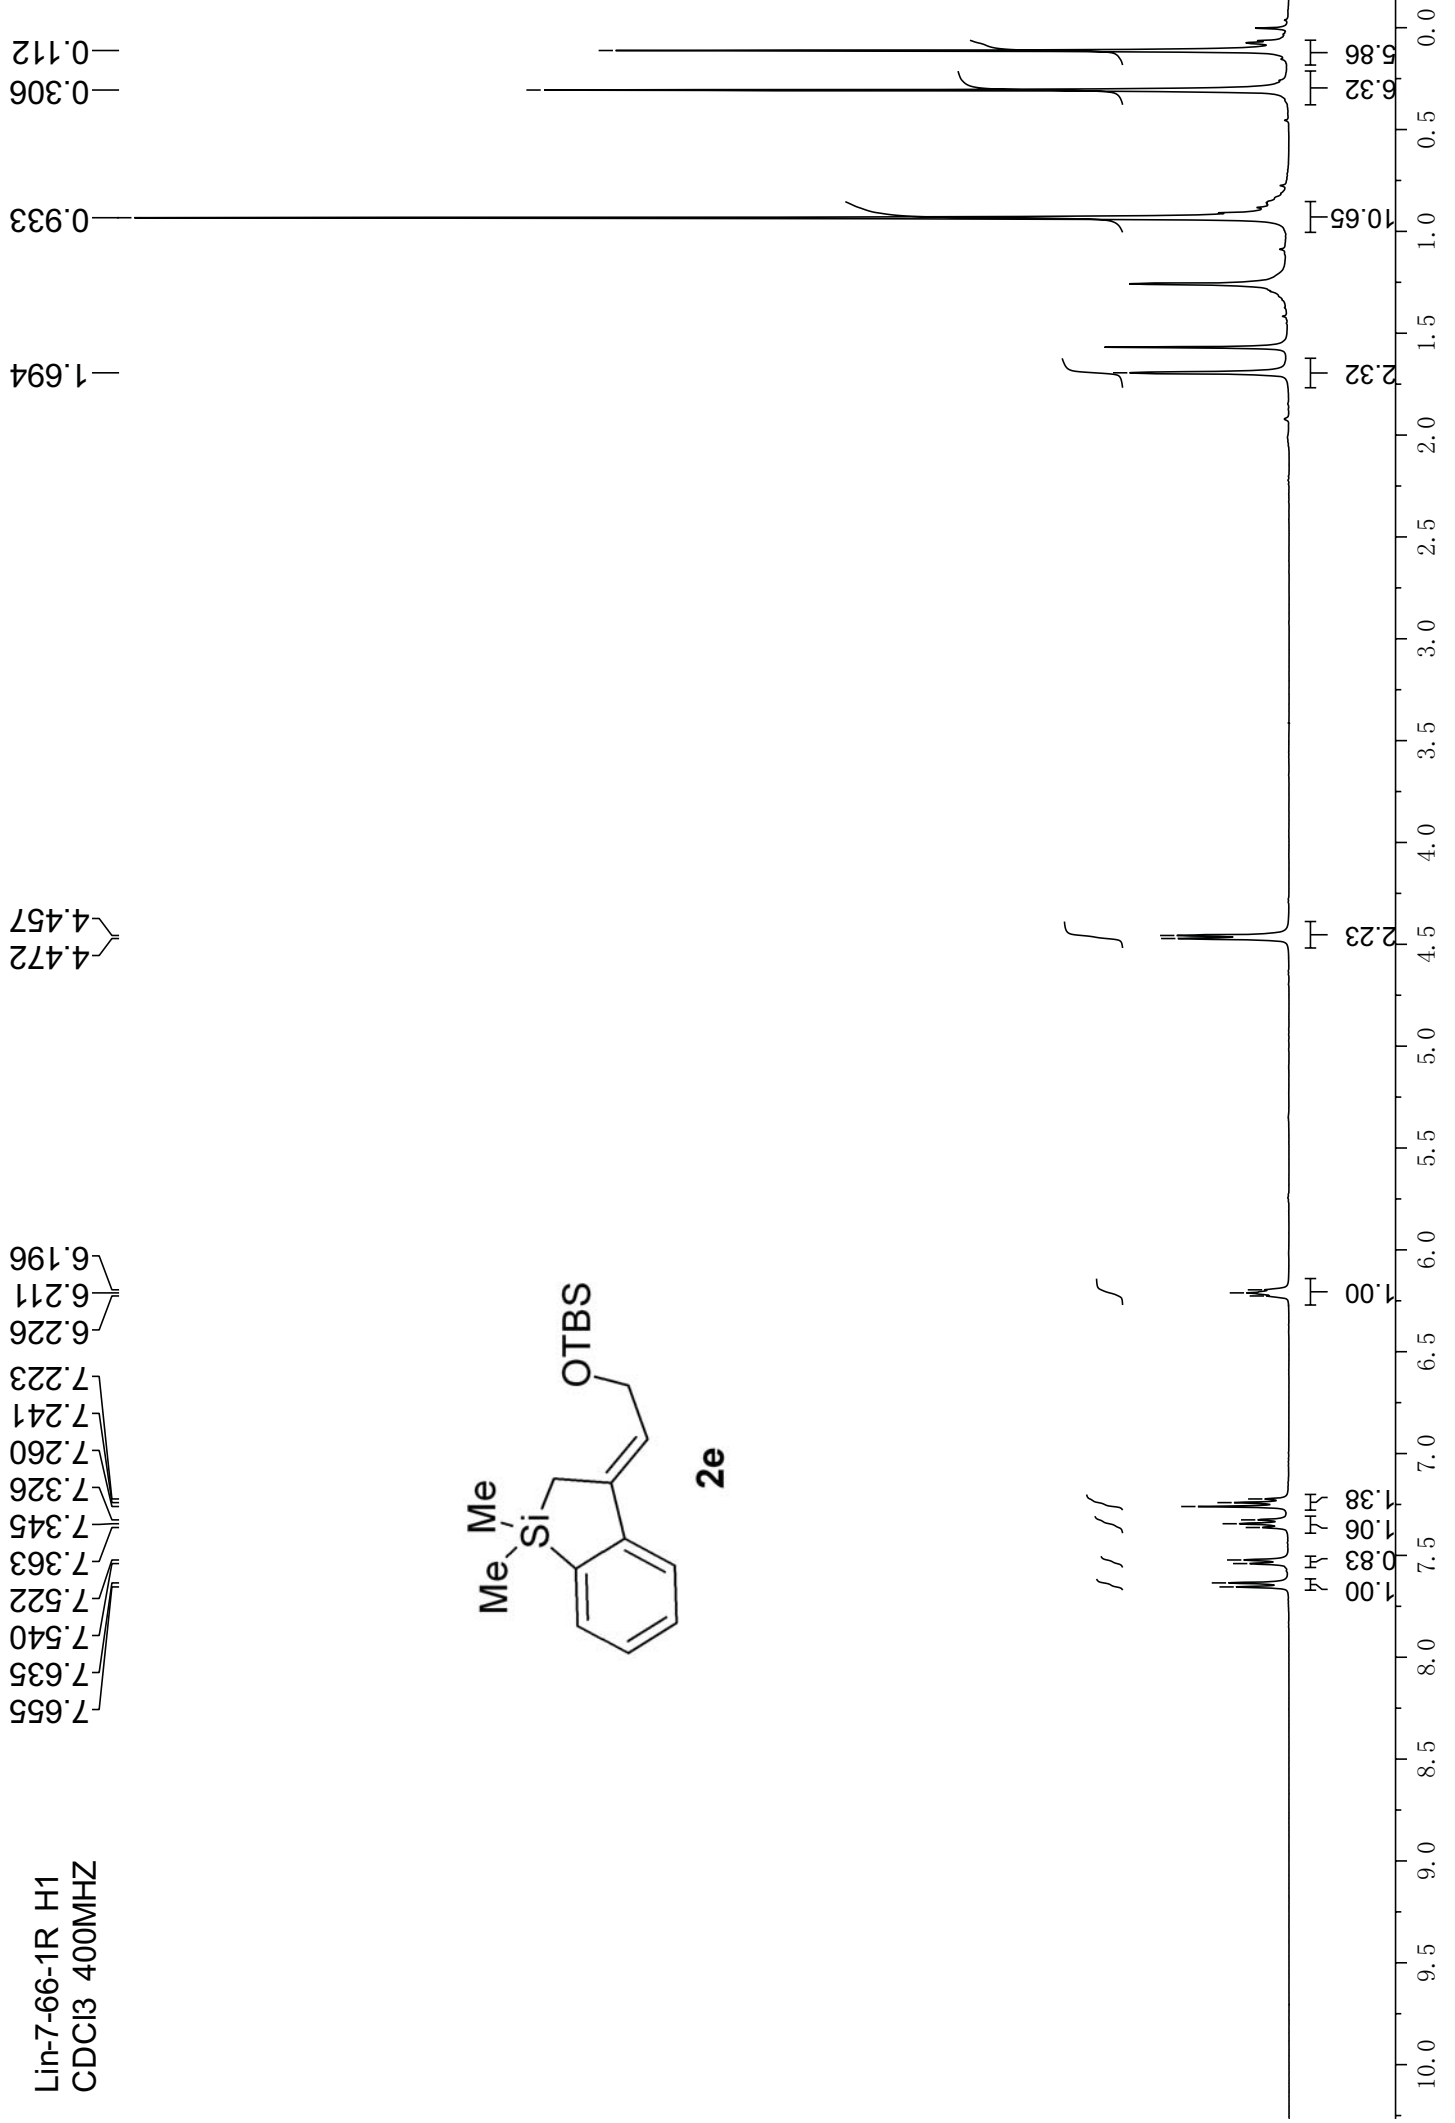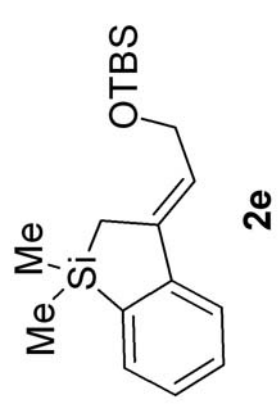

Lin-7-104-2 C13  
CDCI3 100MHZ

149.809  
140.941  
140.205  
132.070  
129.633  
127.206  
123.565  
121.613

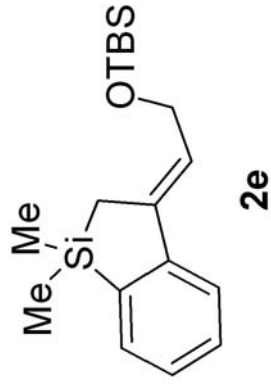

61.922

77.317  
77.000  
76.682

26.023  
18.444  
16.298

1.800  
5.008

S80



Lin-7-88-2a H1  
CDCI3 400MHZ

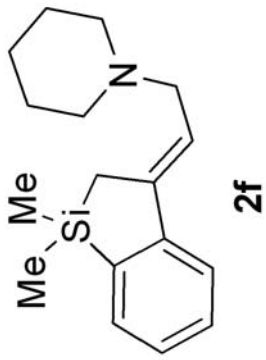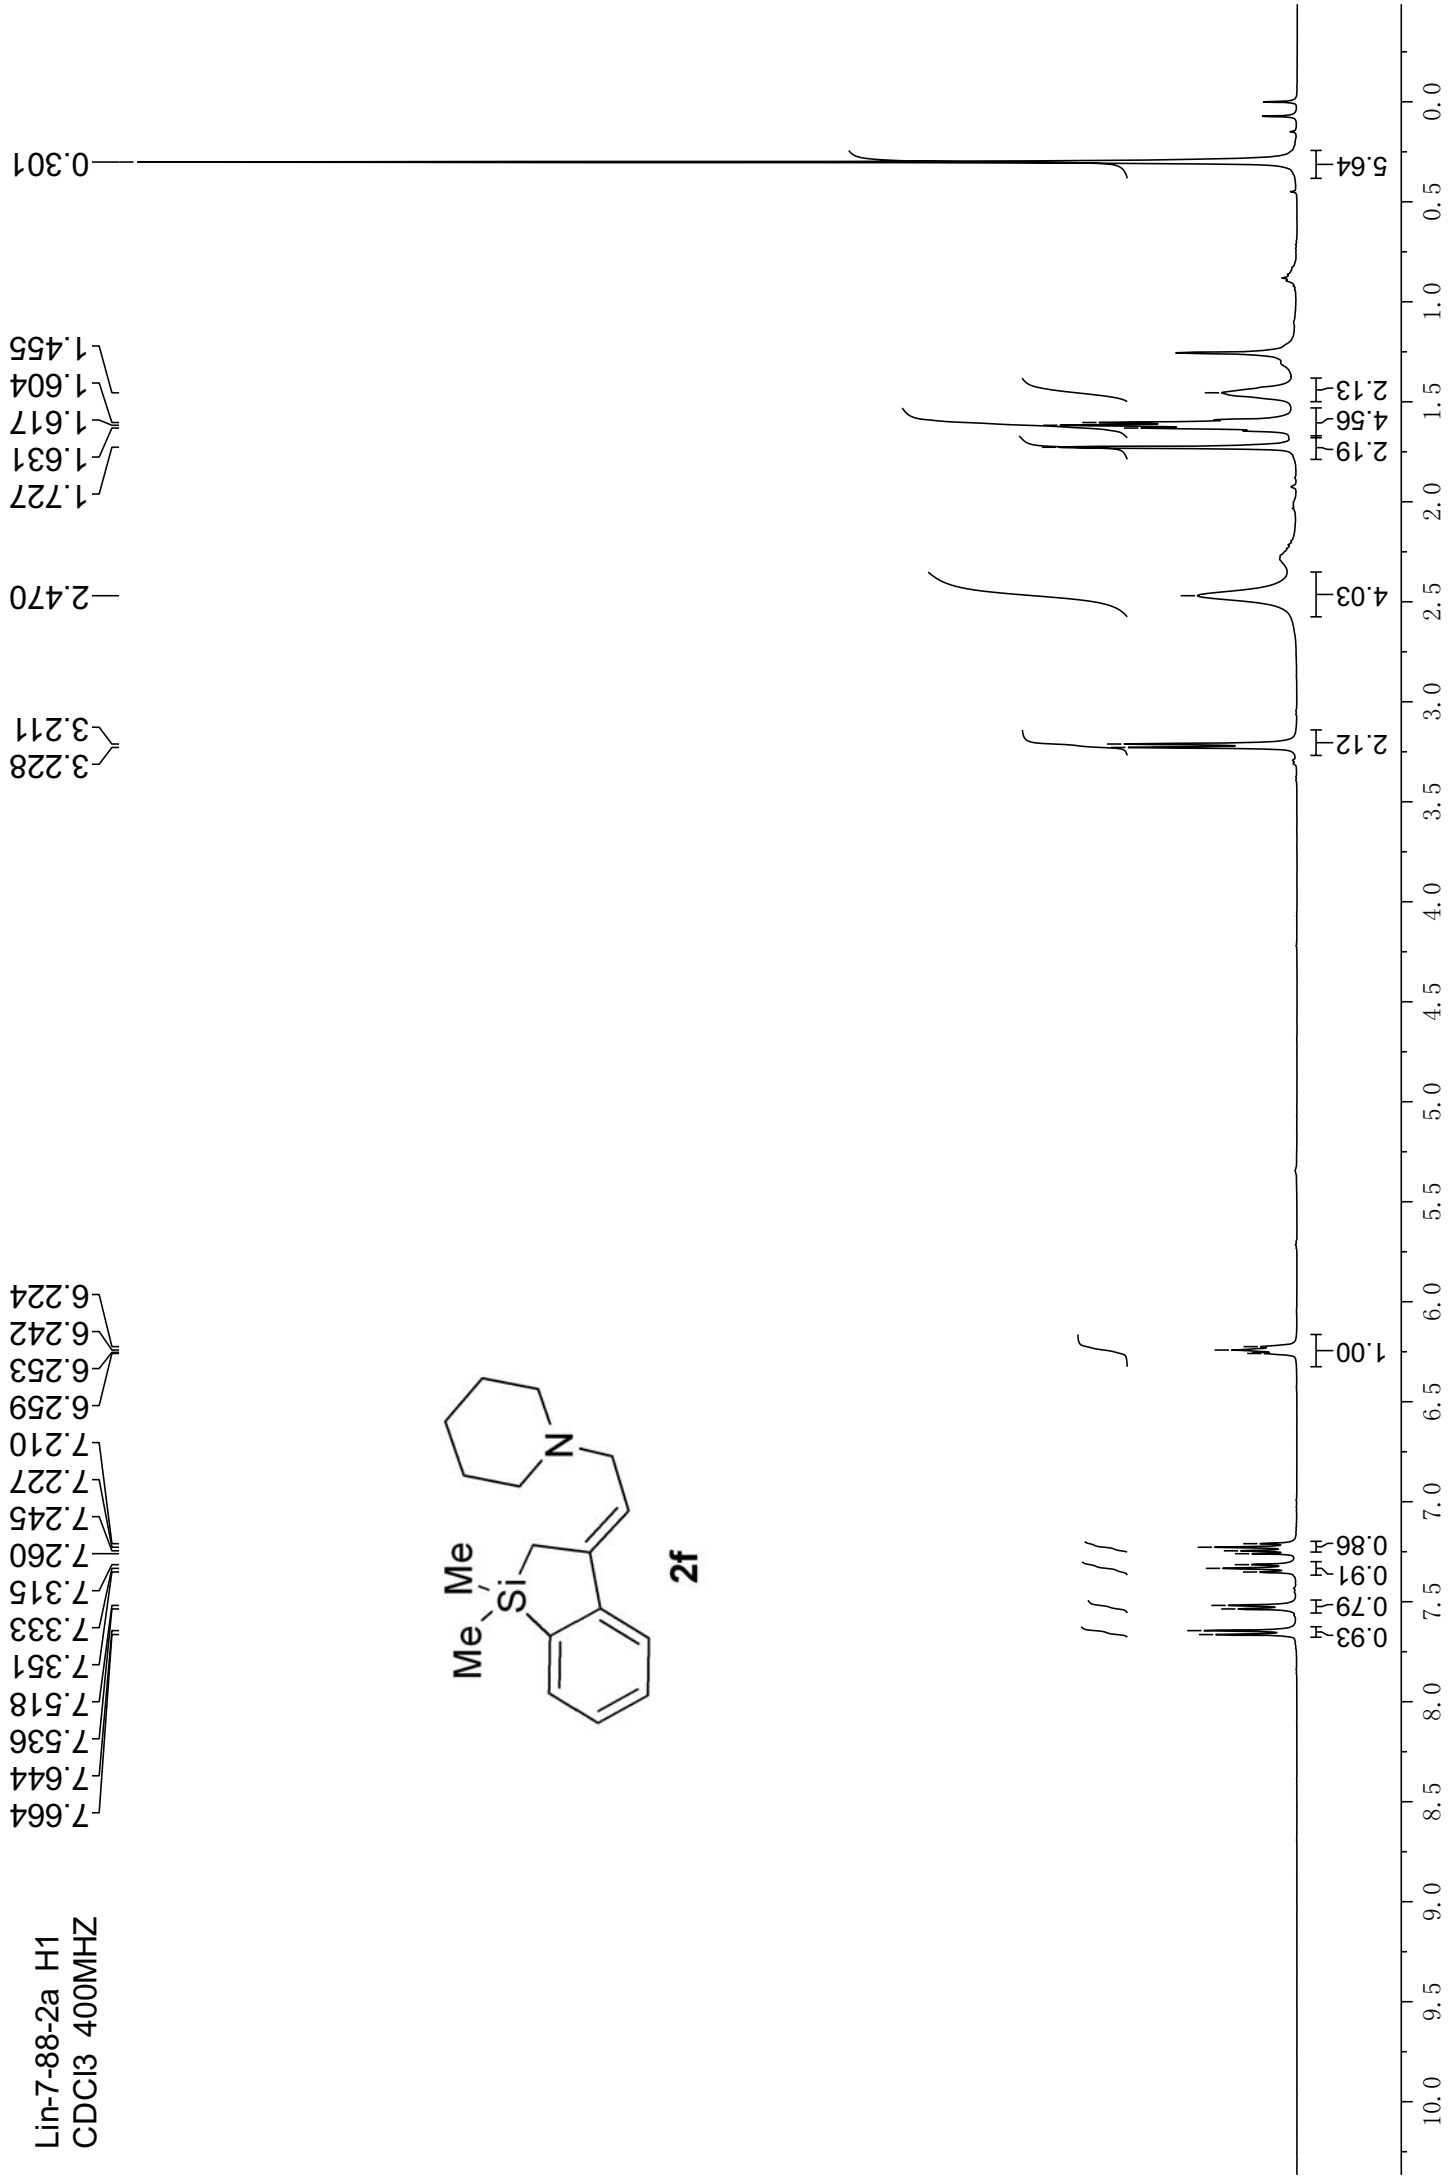

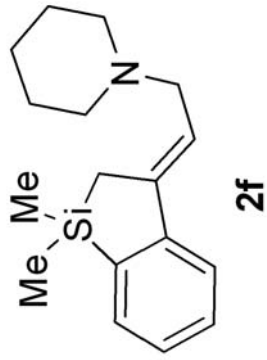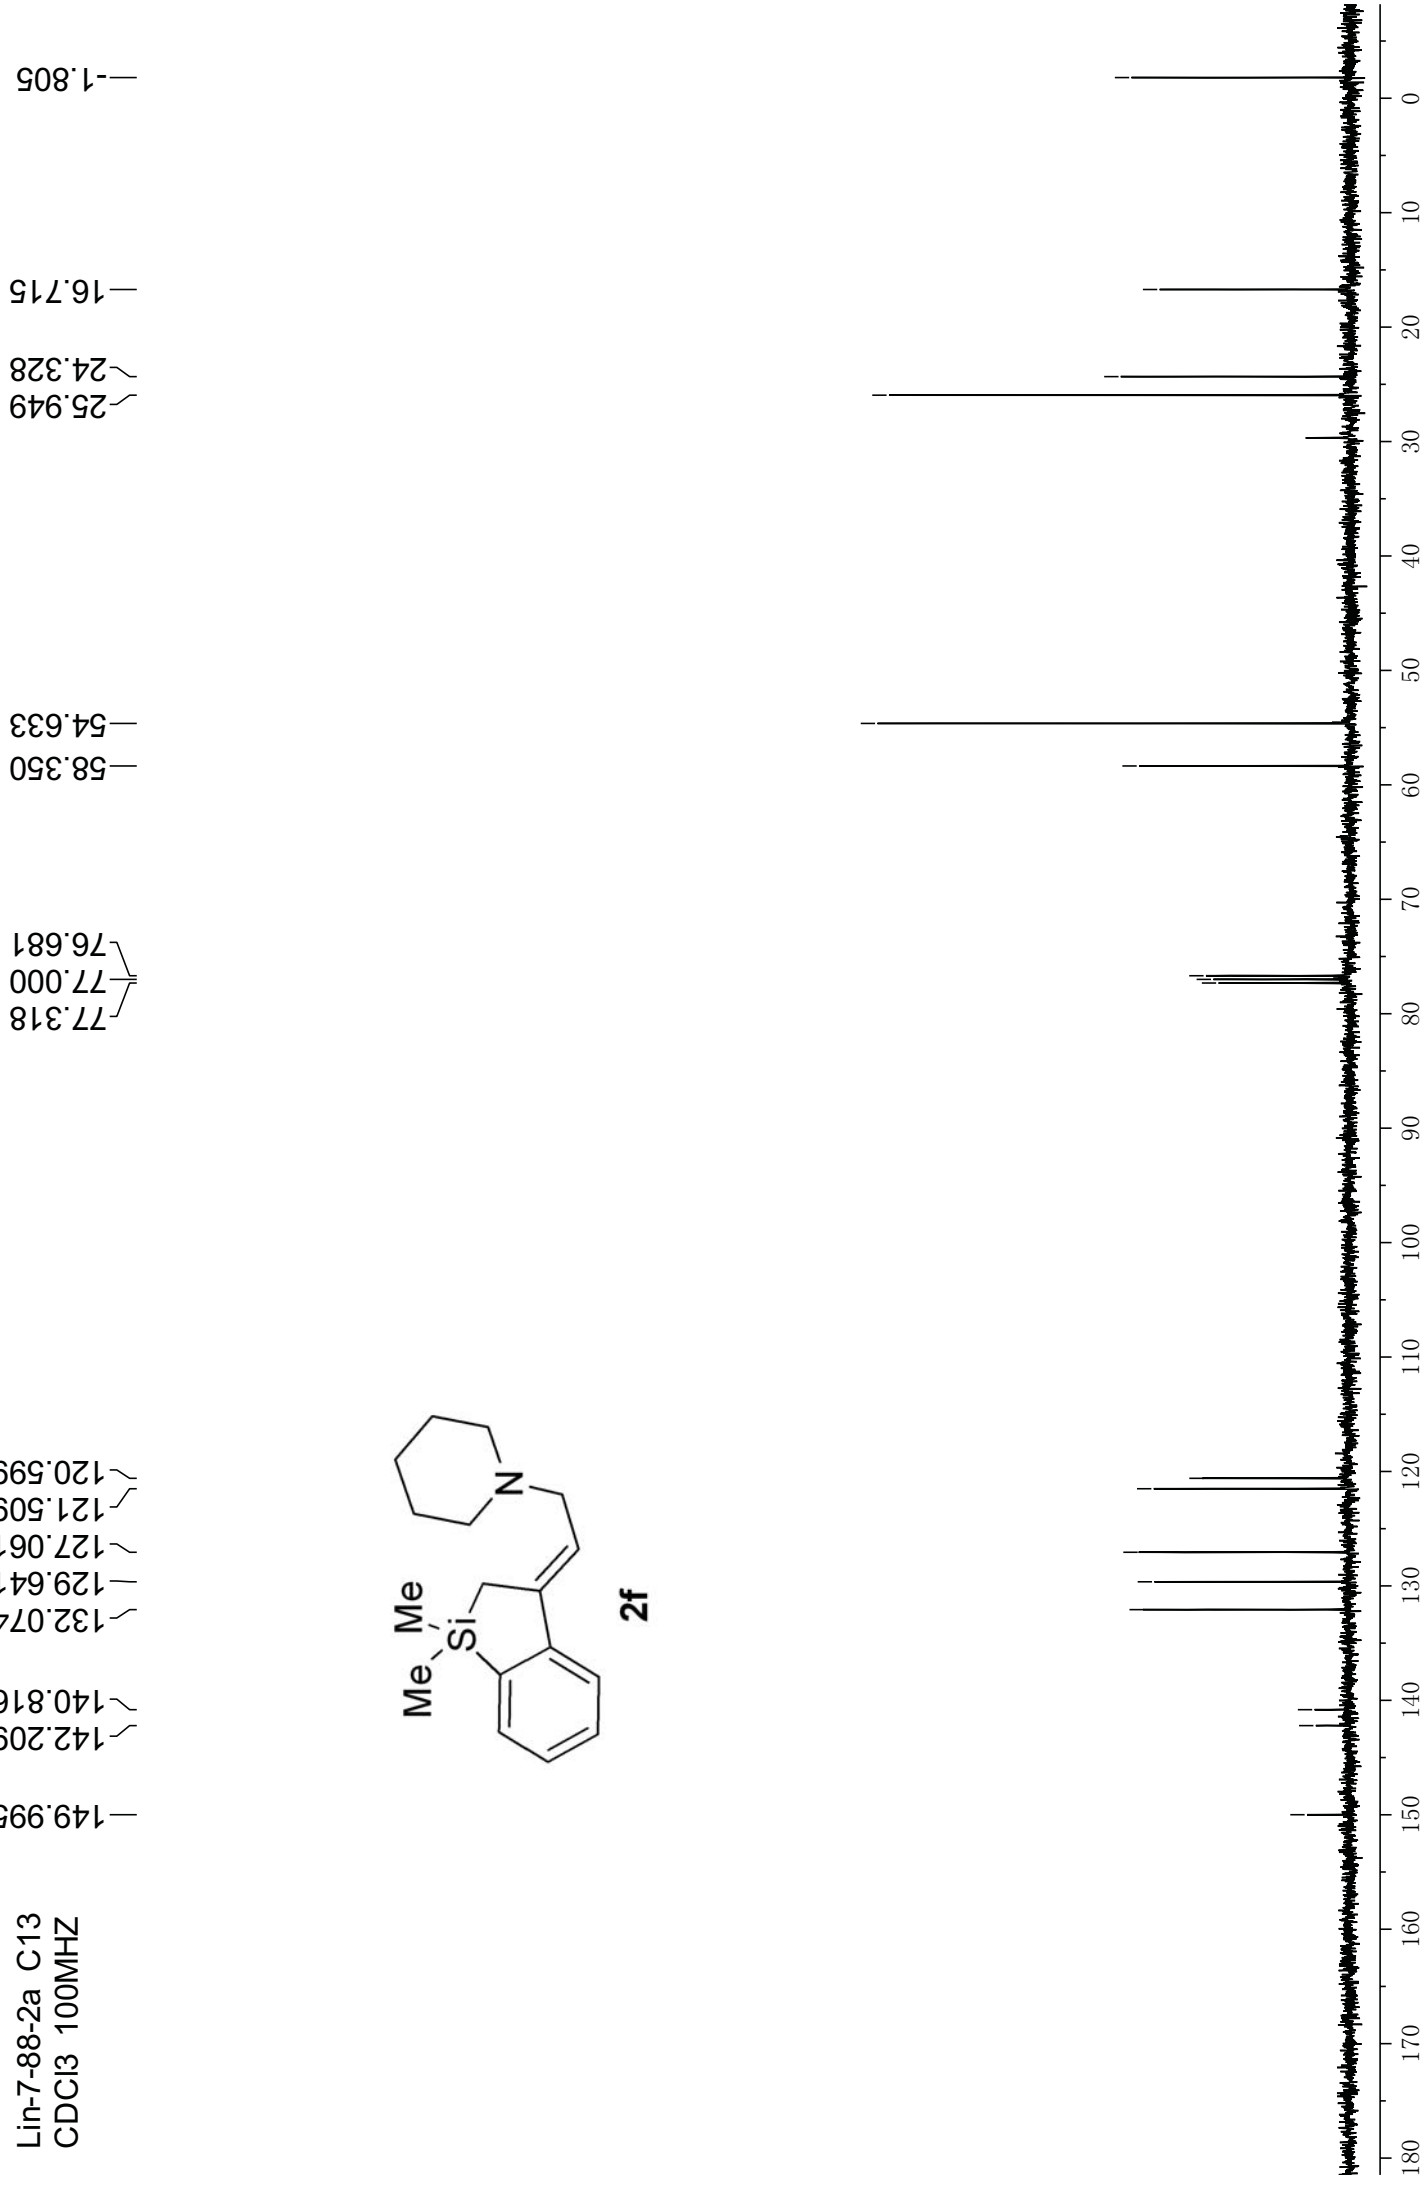

Lin-7-88-2a C13  
CDCI3 100MHZ

Lin-7-66-2R H1  
CDCI3 400MHZ

7.617  
7.597  
7.535  
7.518  
7.347  
7.328  
7.309  
7.260  
7.233  
7.216  
7.198  
6.152  
6.146  
6.134  
6.116

3.749  
3.731  
3.714  
2.537  
2.519  
2.502  
2.484

1.733  
0.918  
0.306  
0.084

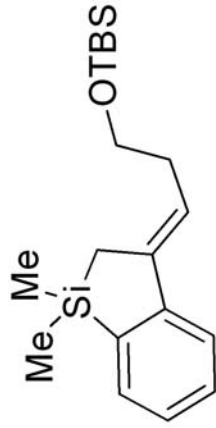

2g

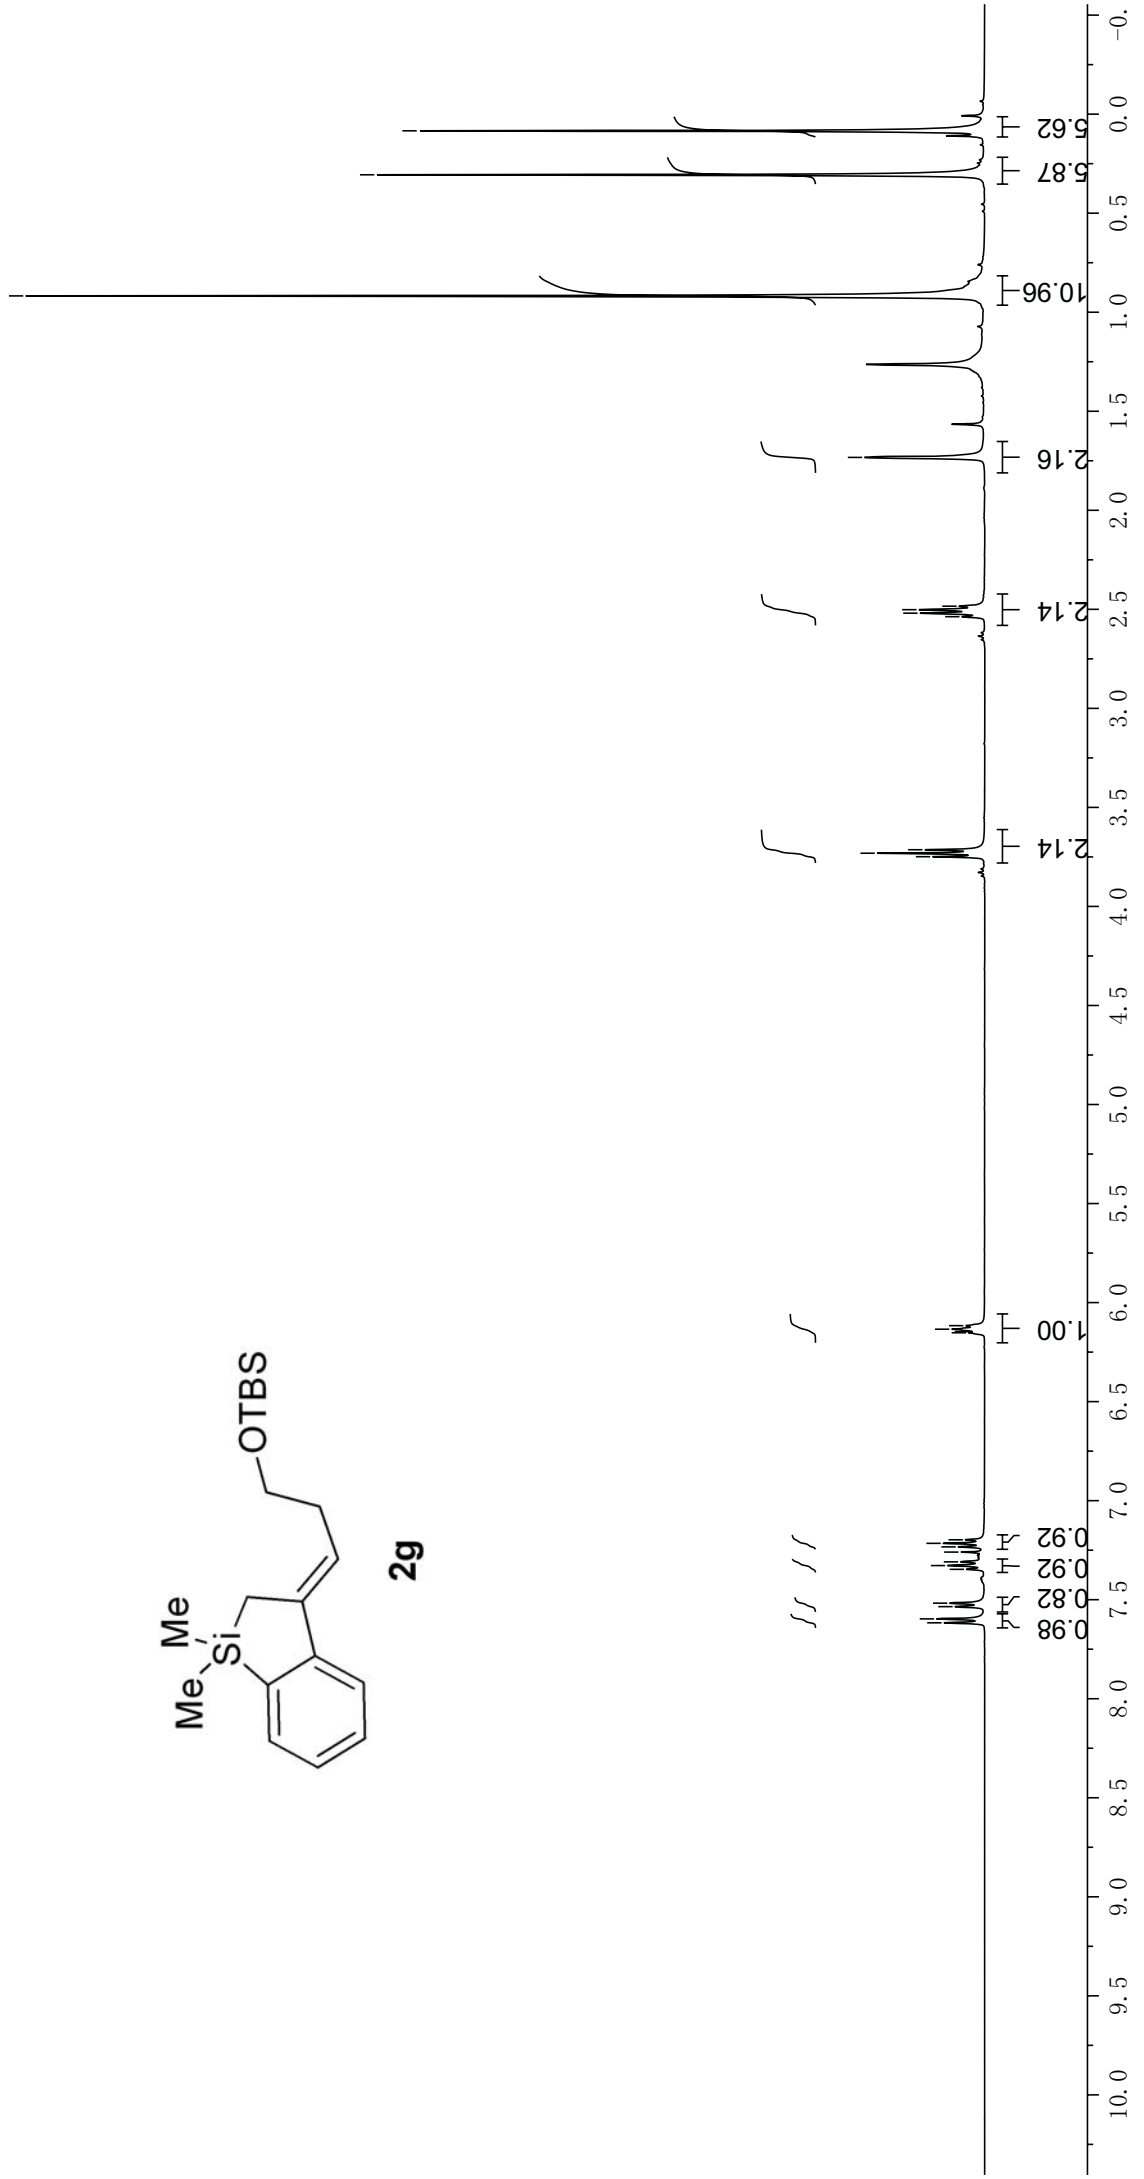

Lin-7-66-2R C13  
CDCI3 100MHZ

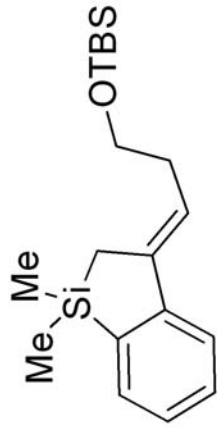

2g

150.244  
141.355  
140.795  
132.118  
129.548  
126.748  
121.129  
120.075  
76.682  
77.000  
77.319  
62.829  
33.472  
25.989  
18.403  
16.222  
1.767  
-5.193

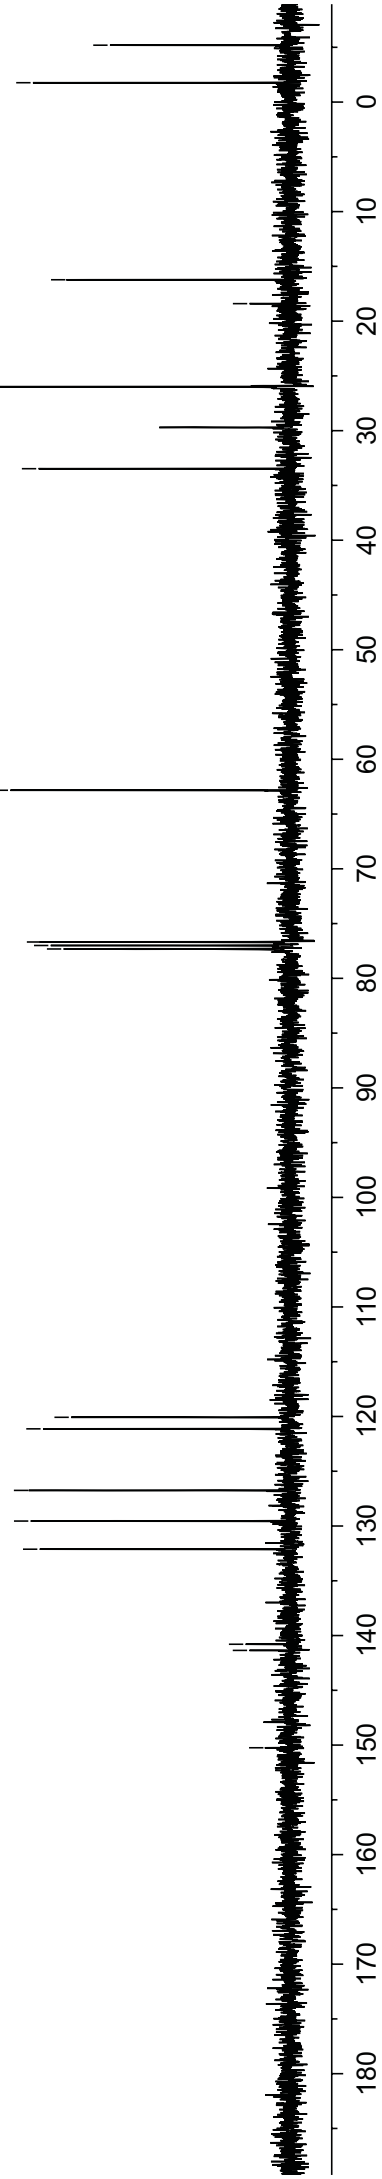

Lin-7-88-4a H1  
CDCI3 400MHZ

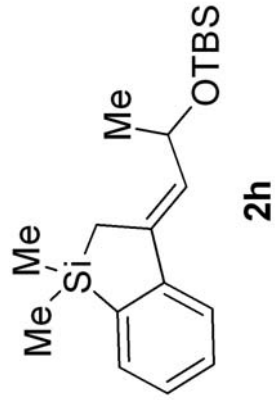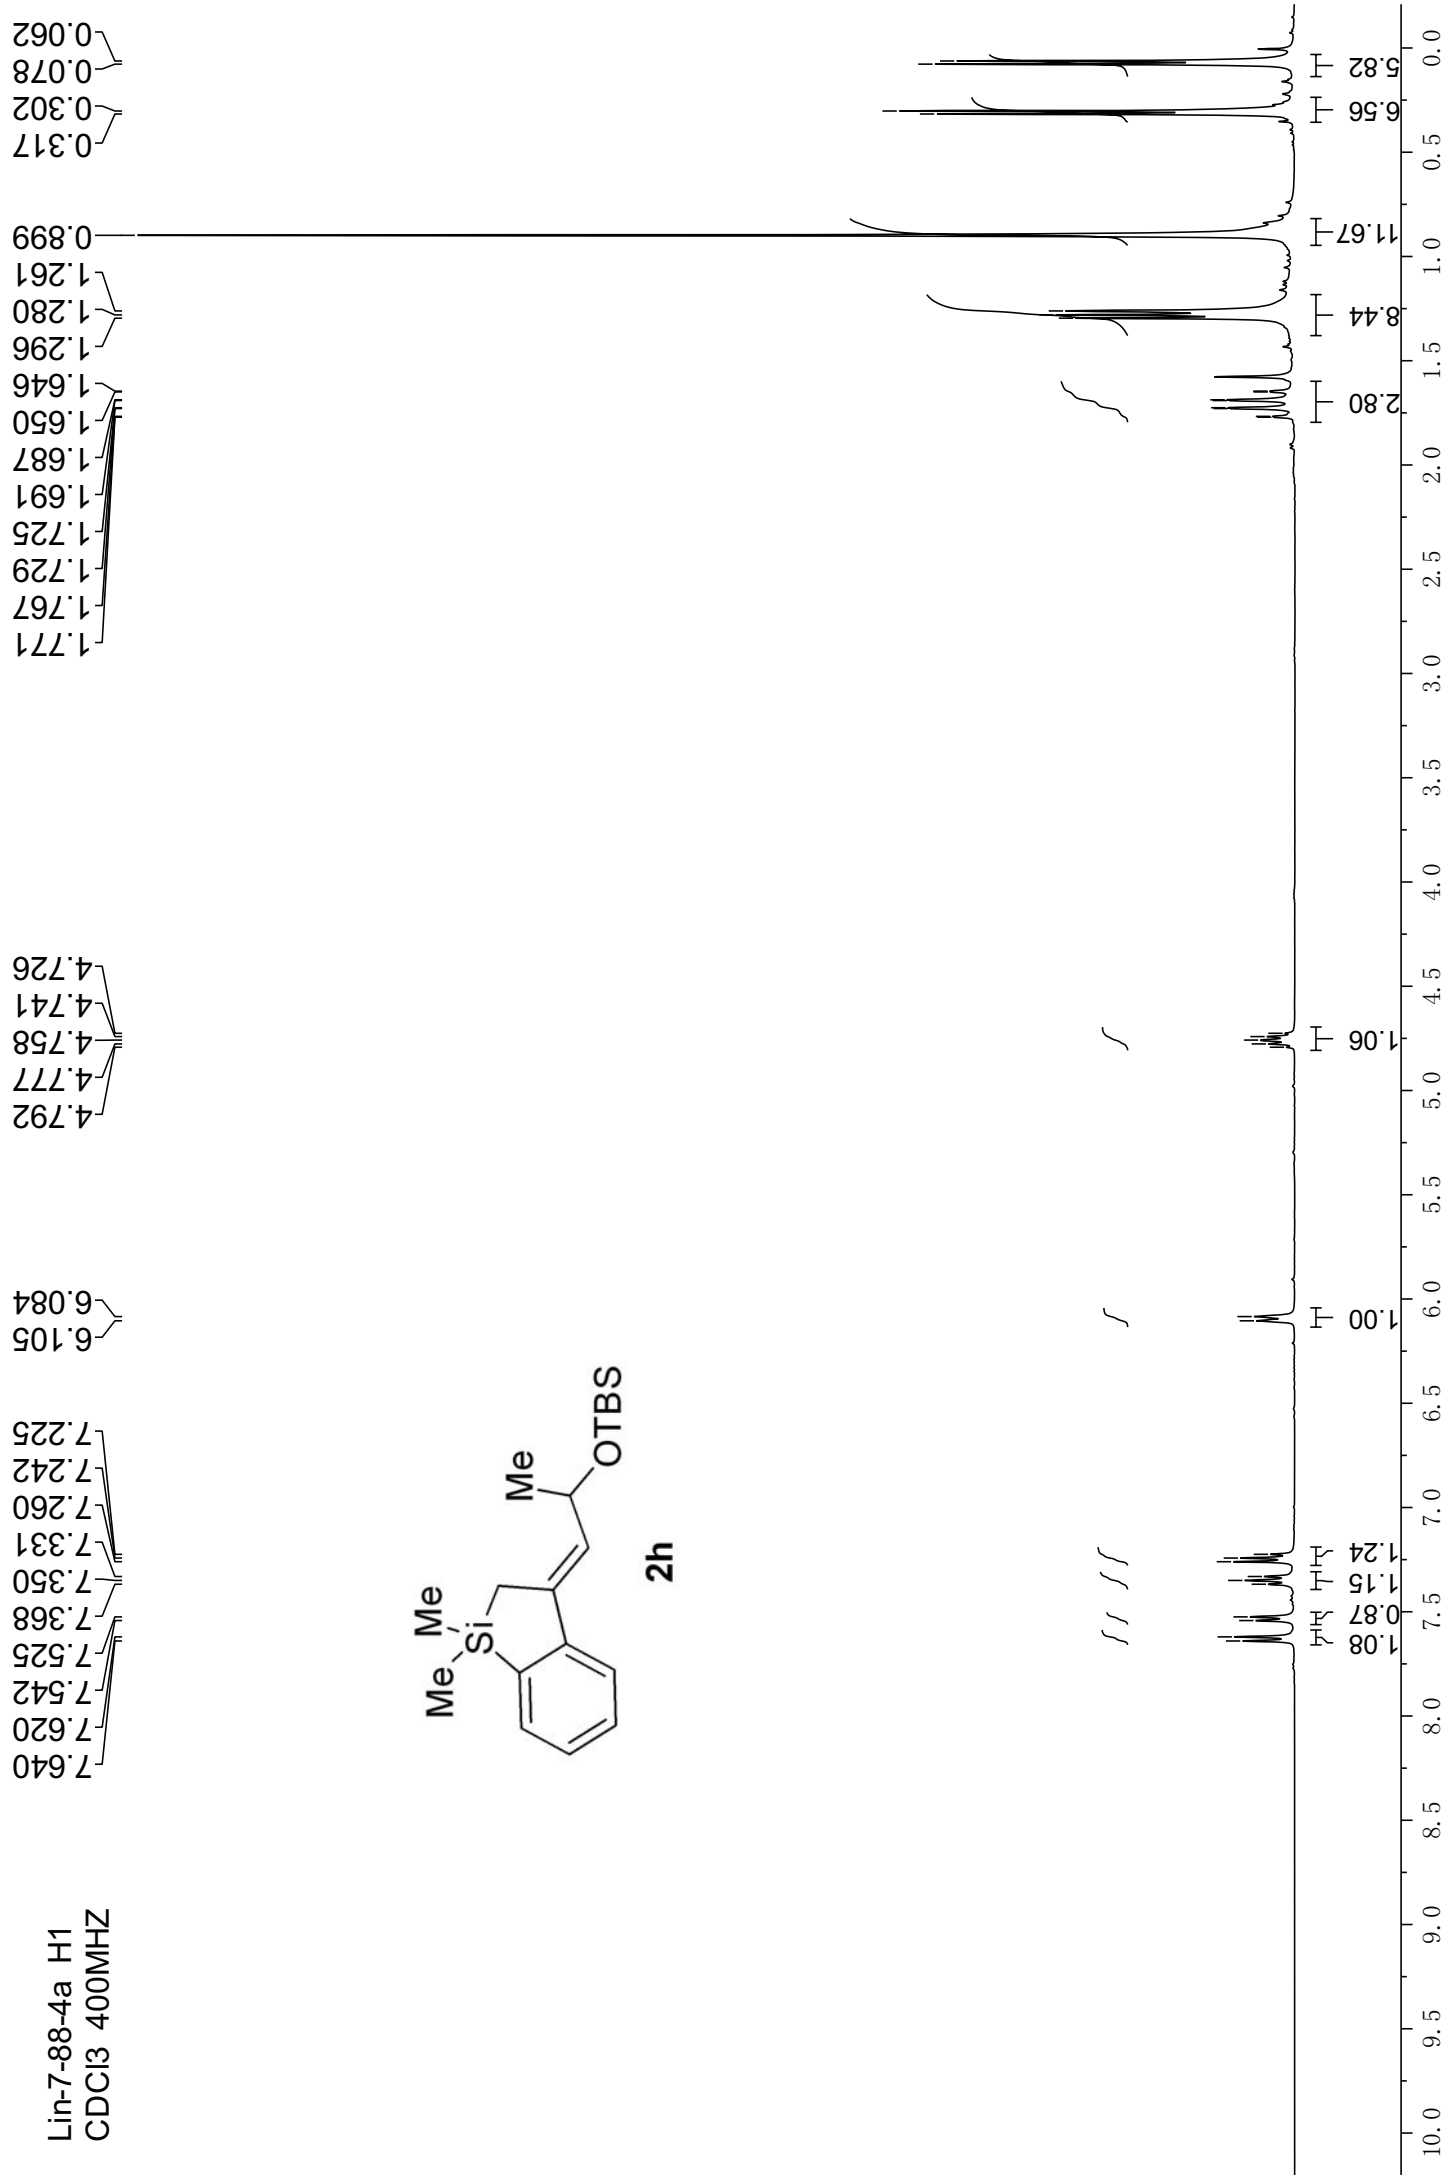

Lin-7-88-4a 13  
CDCI3 100MHZ

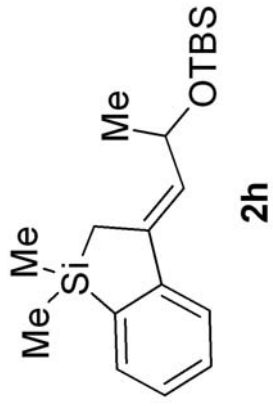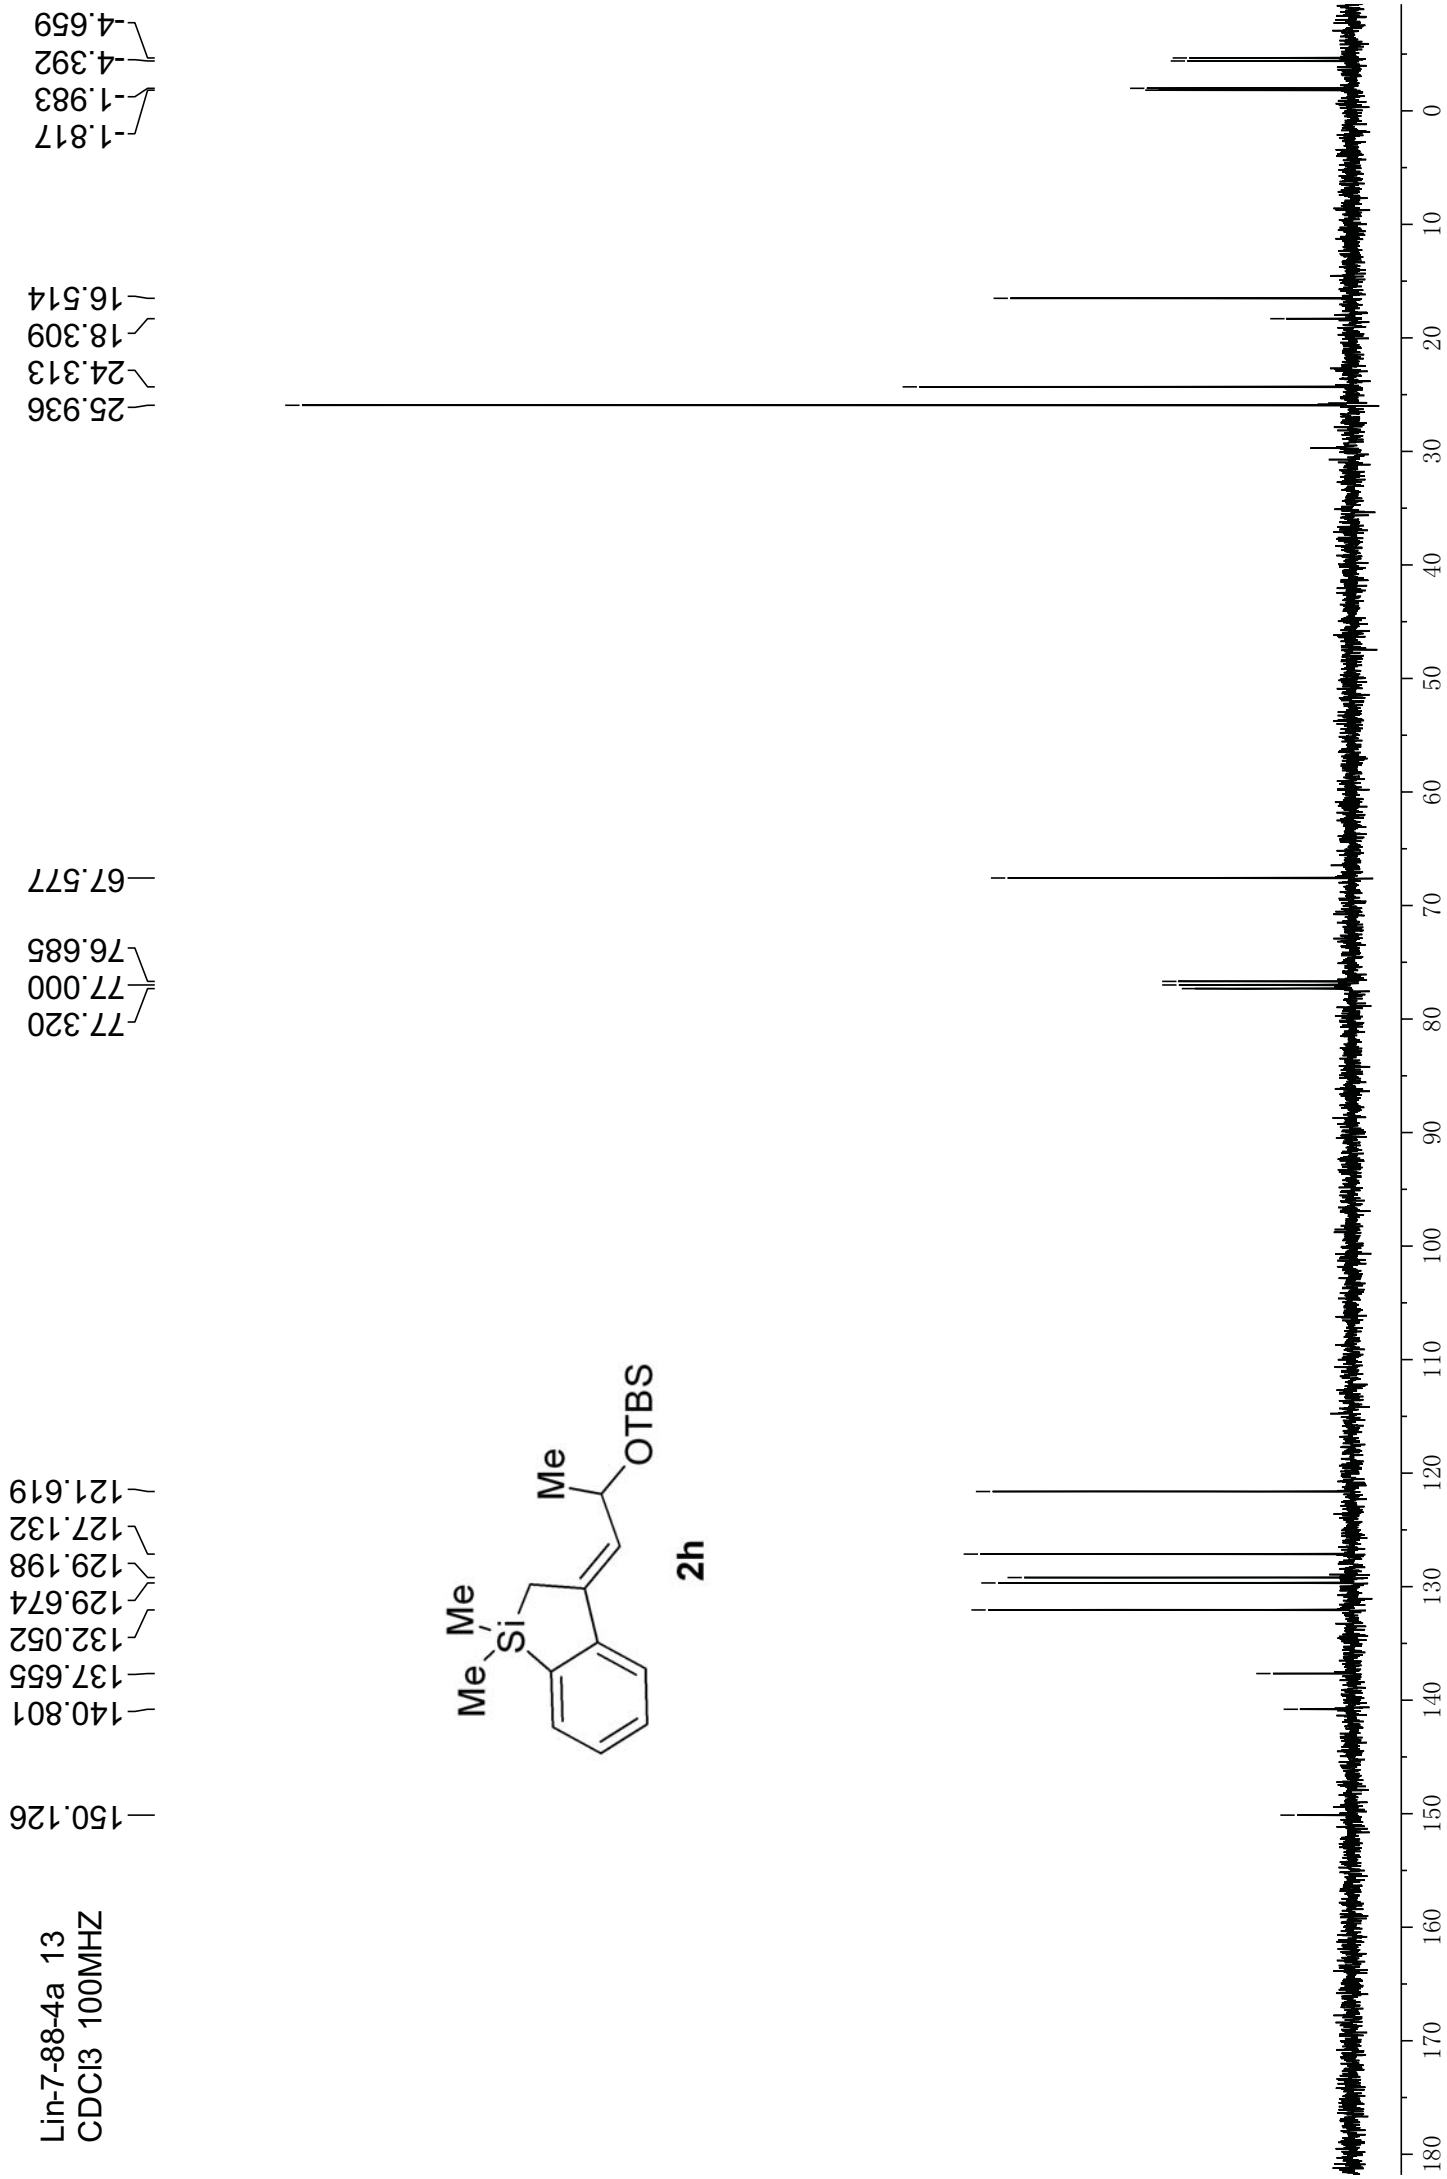

Lin-7-60-4a H1  
CDCI3 400MHZ

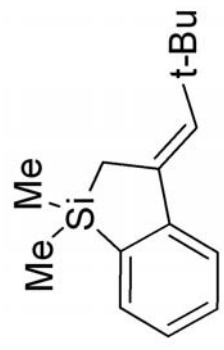

2i

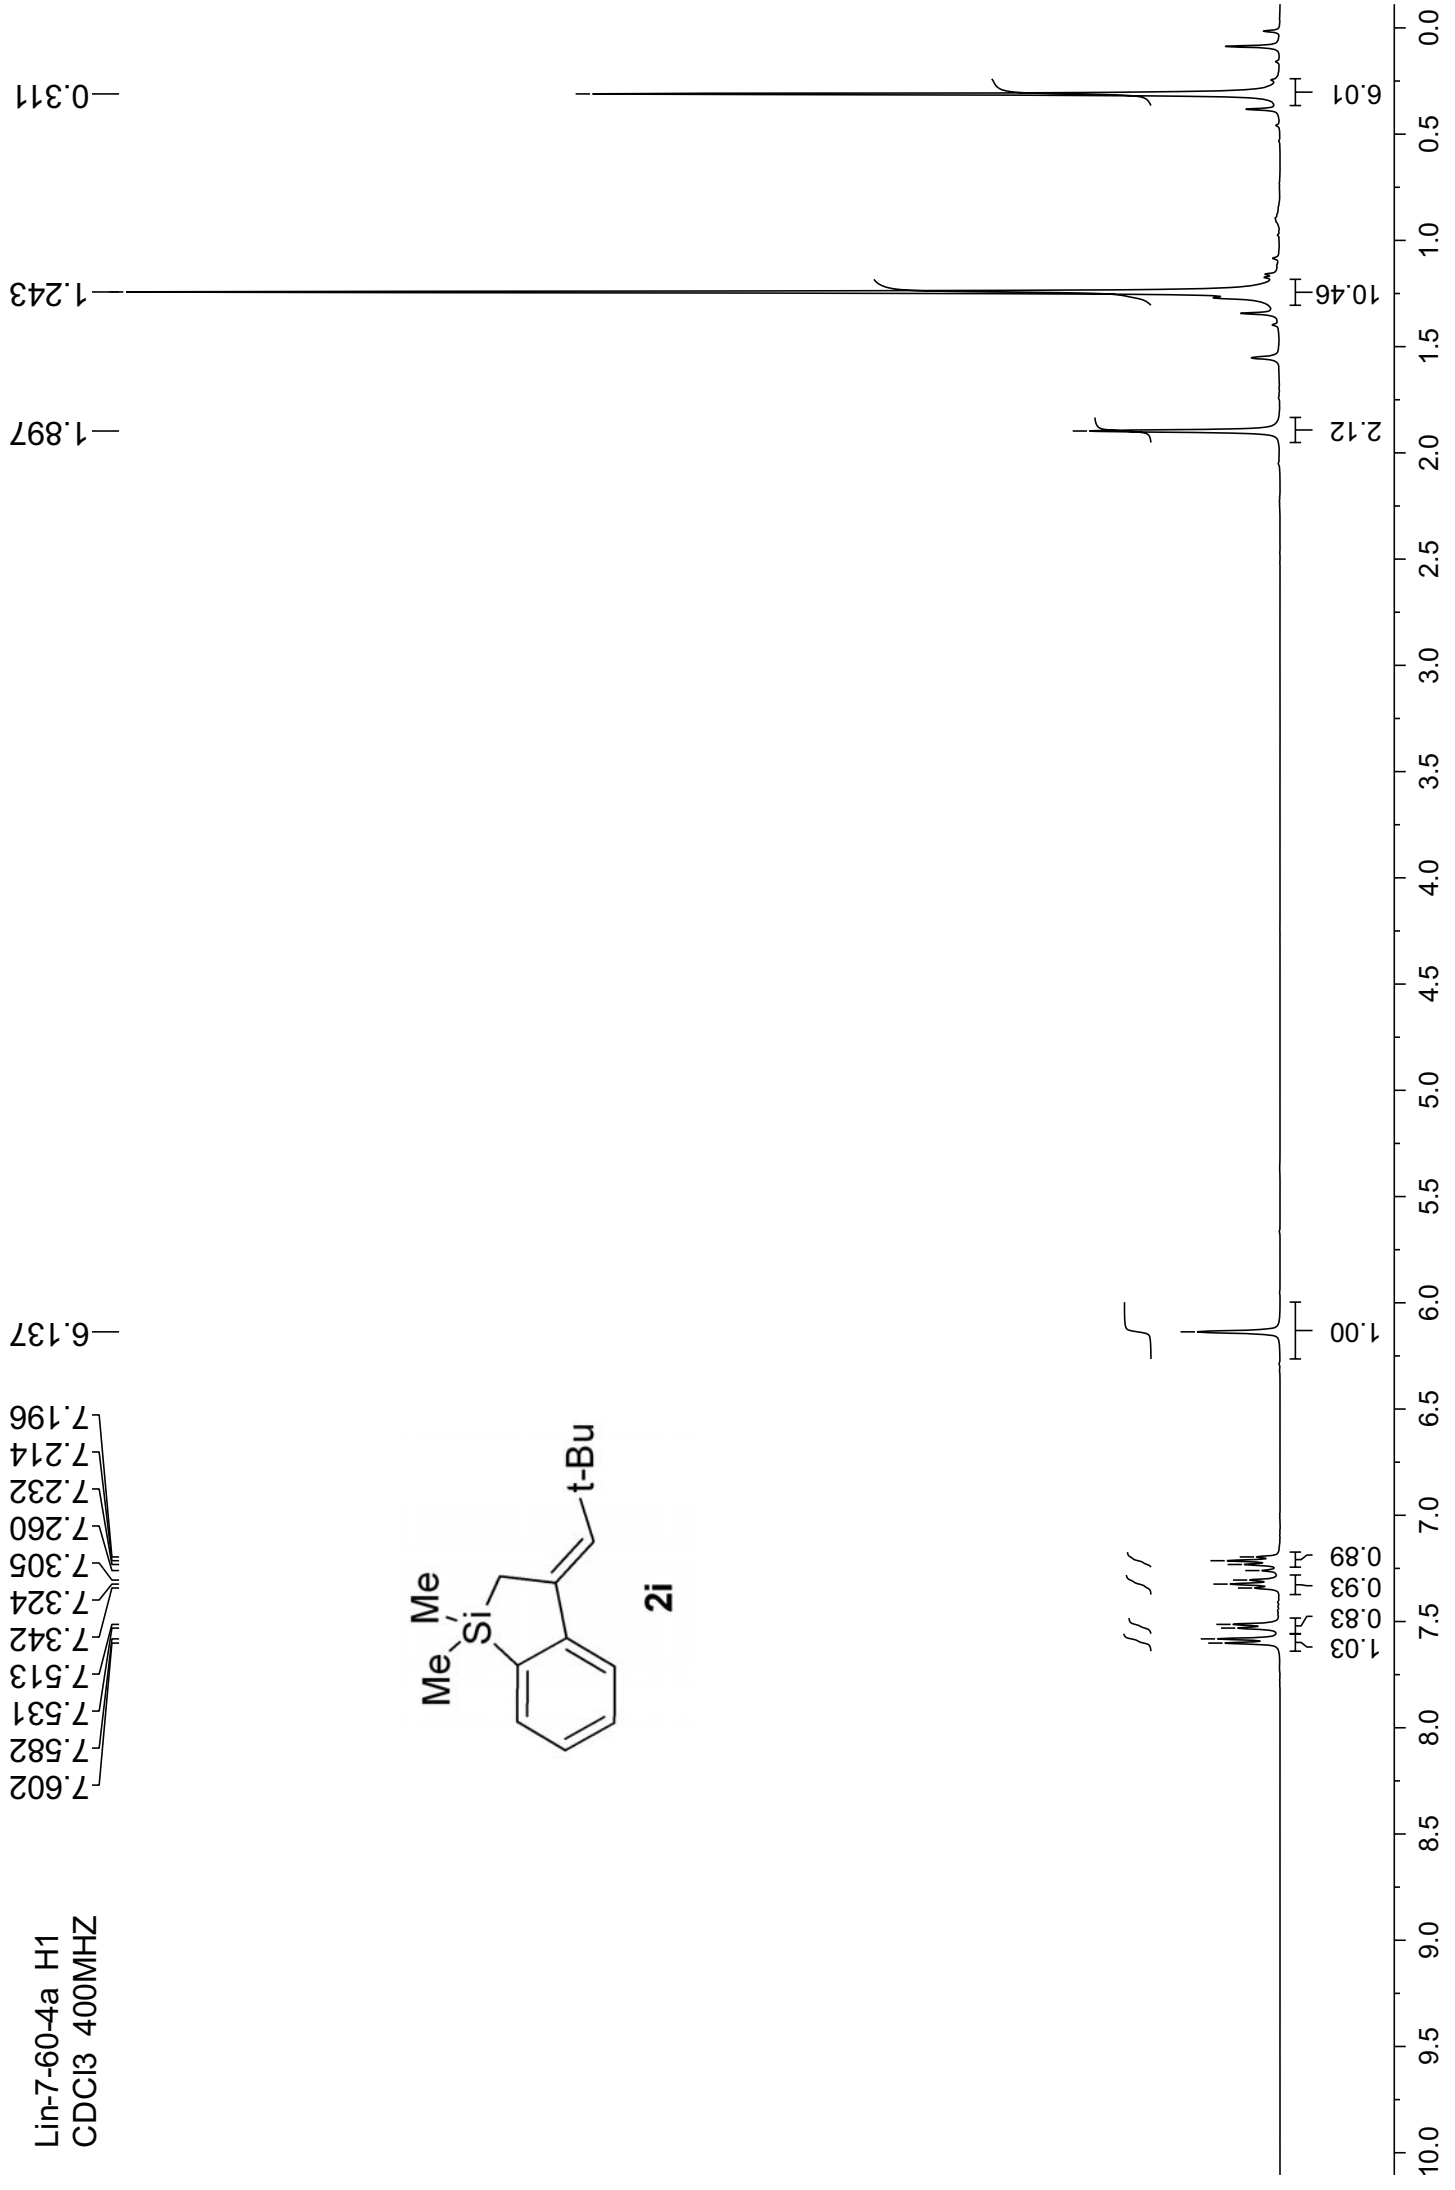

Lin-7-60-4a C13  
CDCI3 100MHZ

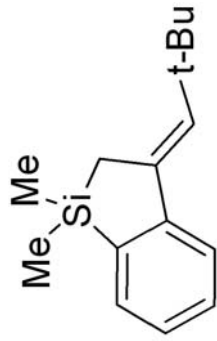

2i

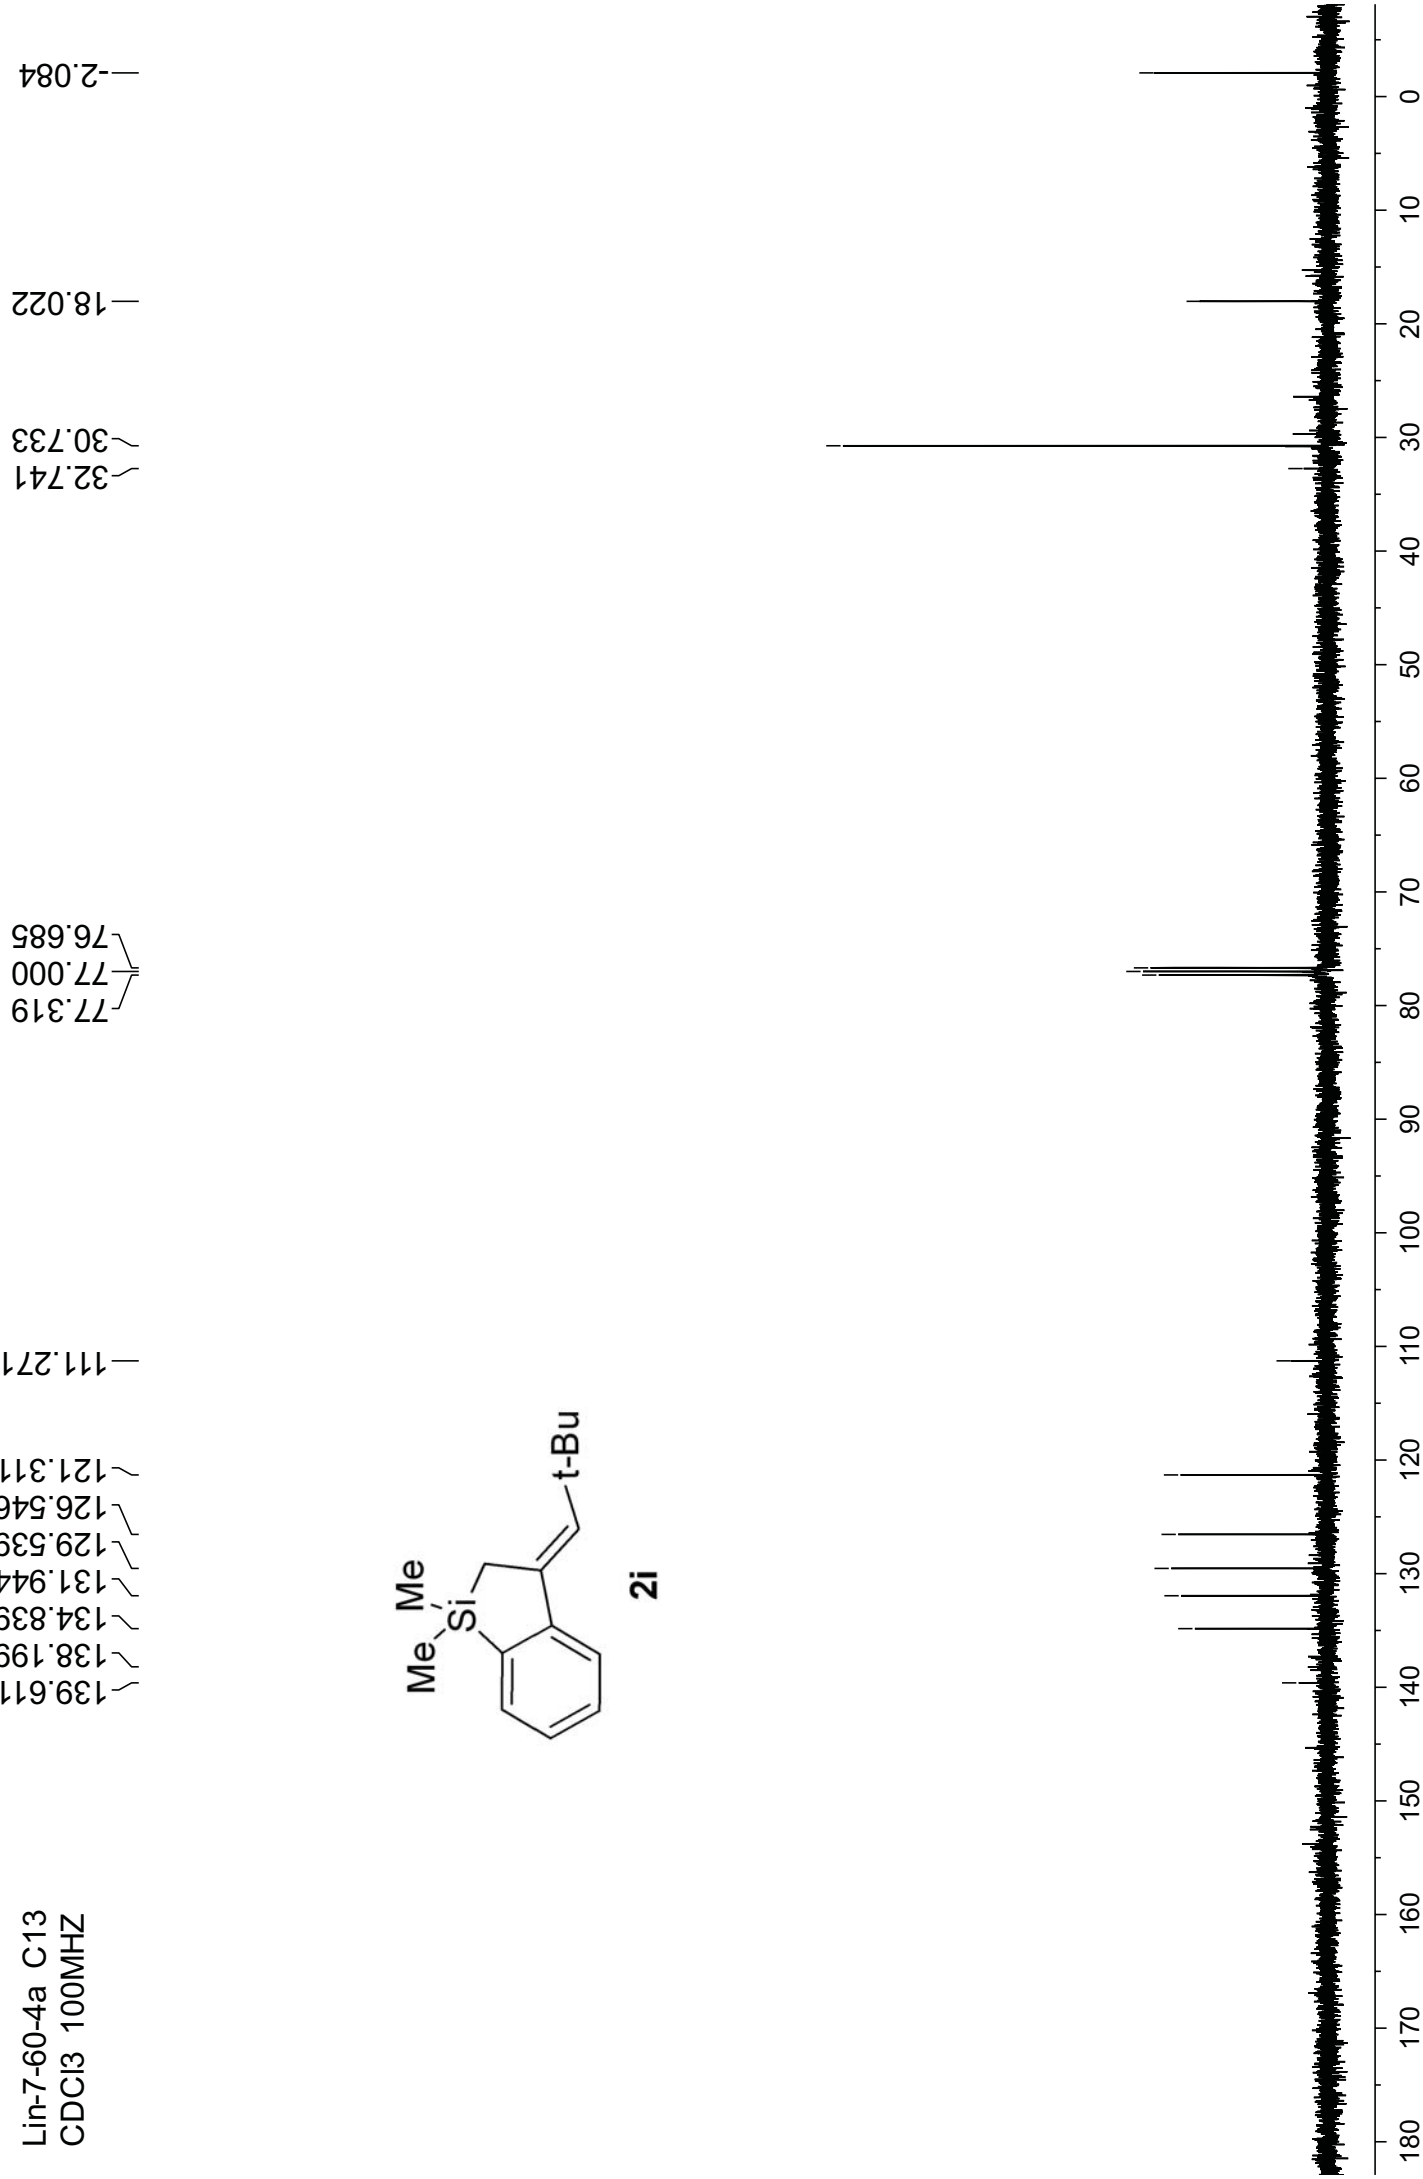



Lin-7-44-2a H1  
CDCI3 600MHZ

7.670  
7.657  
7.534  
7.522  
7.358  
7.345  
7.332  
7.265  
7.253  
7.241

6.126  
5.648

2.142  
1.900

0.303  
0.195

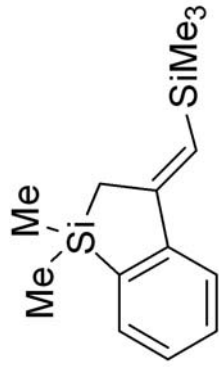

2j

Z-isomer E-isomer

■

●

|||

|

|

|

|

|

|

|

|

|

|

|

|

|

|

|

1.03  
0.99  
1.06  
1.46

1.00

0.12

0.32

2.14

10.0 9.5 9.0 8.5 8.0 7.5 7.0 6.5 6.0 5.5 5.0 4.5 4.0 3.5 3.0 2.5 2.0 1.5 1.0 0.5 0.0

Lin-6-77-1a NOEDS 6.119  
CDCI3 600MHZ

7.677  
7.664

6.130

0.198

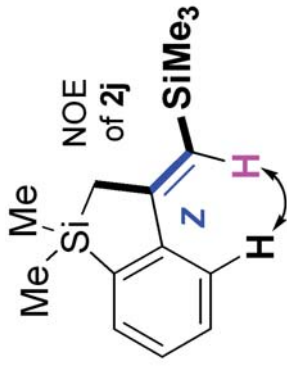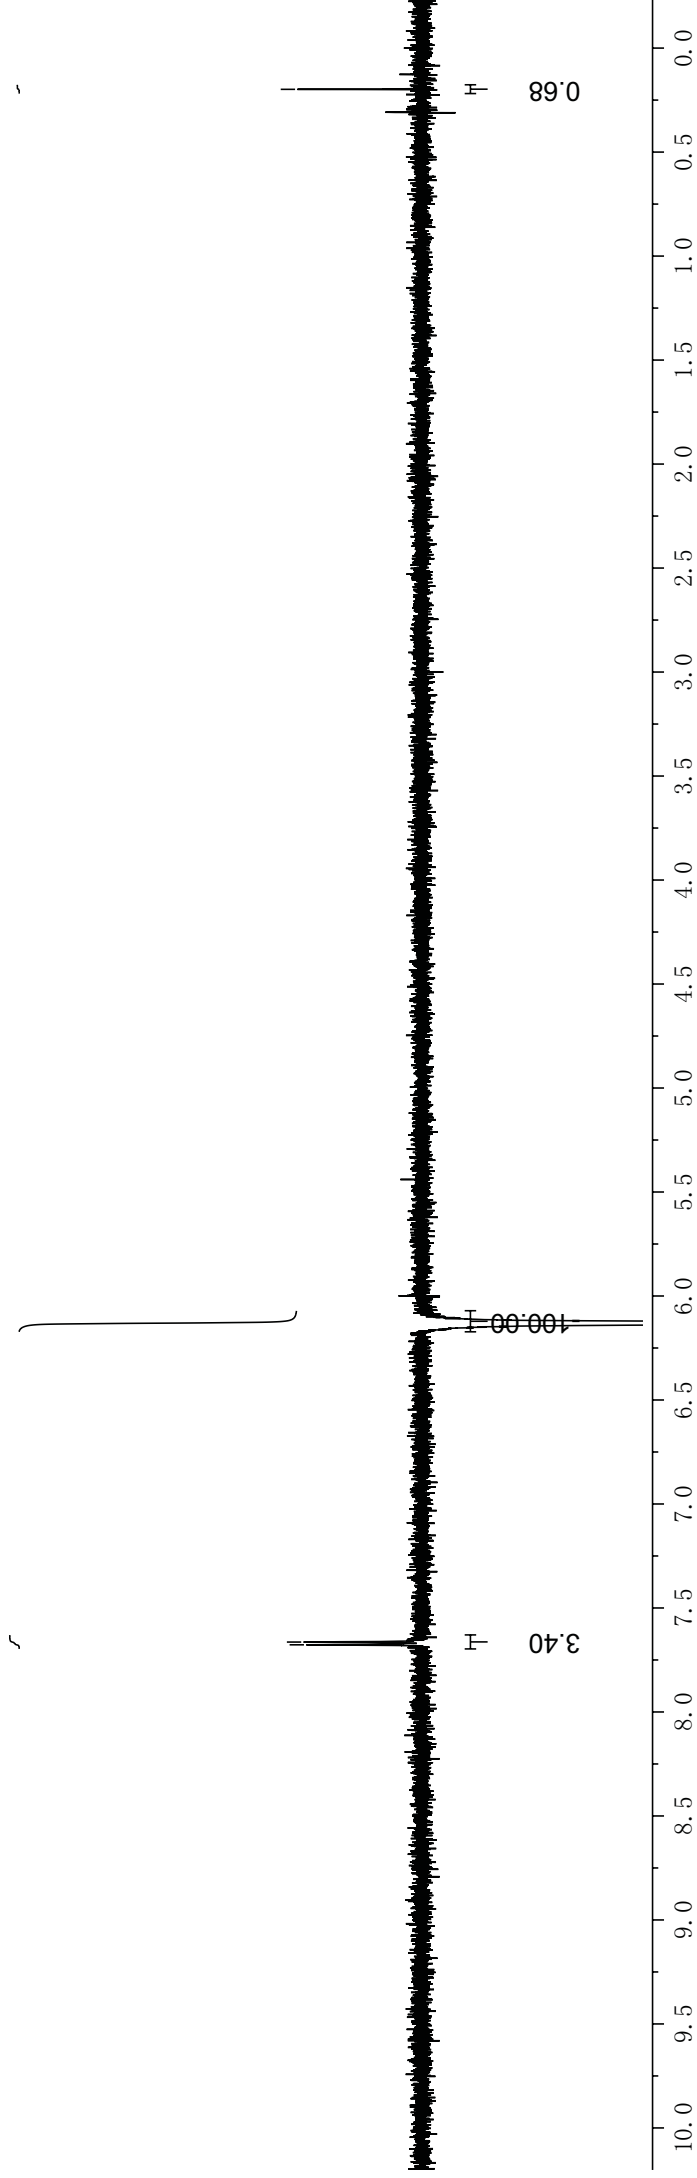

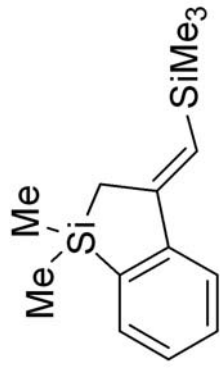

2j

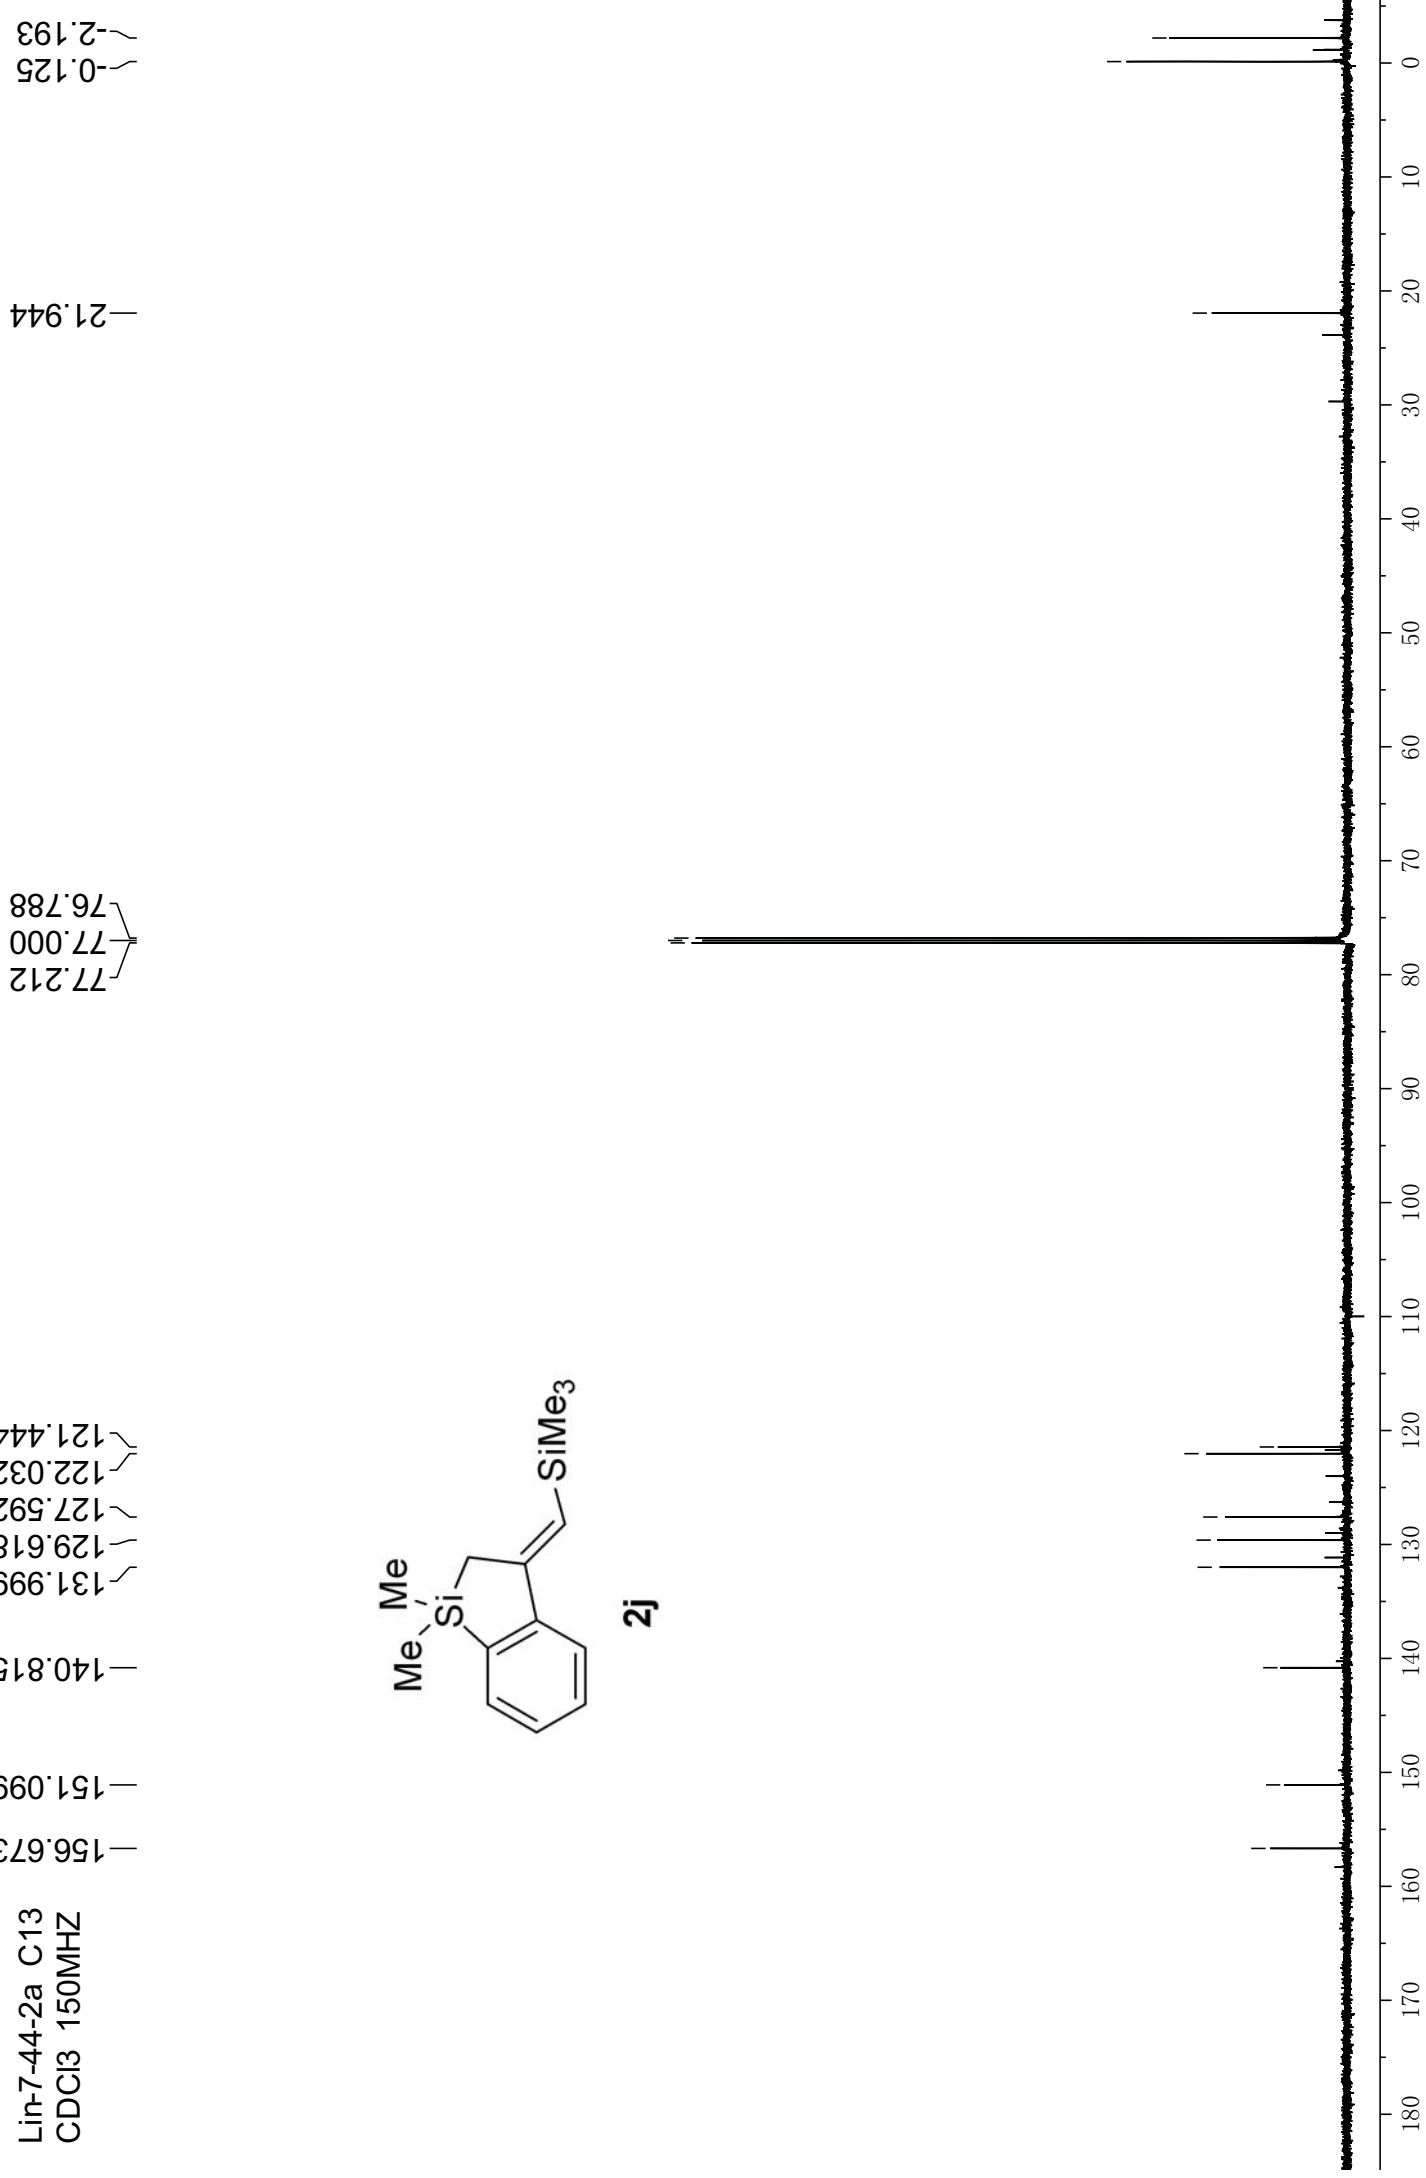

Lin-7-44-3a H1  
CDCI3 600HMZ

7.691  
7.678  
7.541  
7.529  
7.368  
7.356  
7.343  
7.271  
7.259  
7.247  
-6.059

-1.909  
-1.539  
-1.000  
-0.987  
-0.974  
-0.731  
-0.718  
-0.705  
-0.592

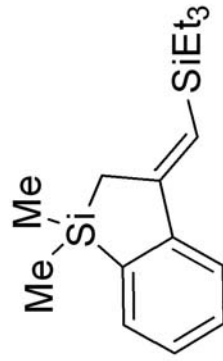

2k

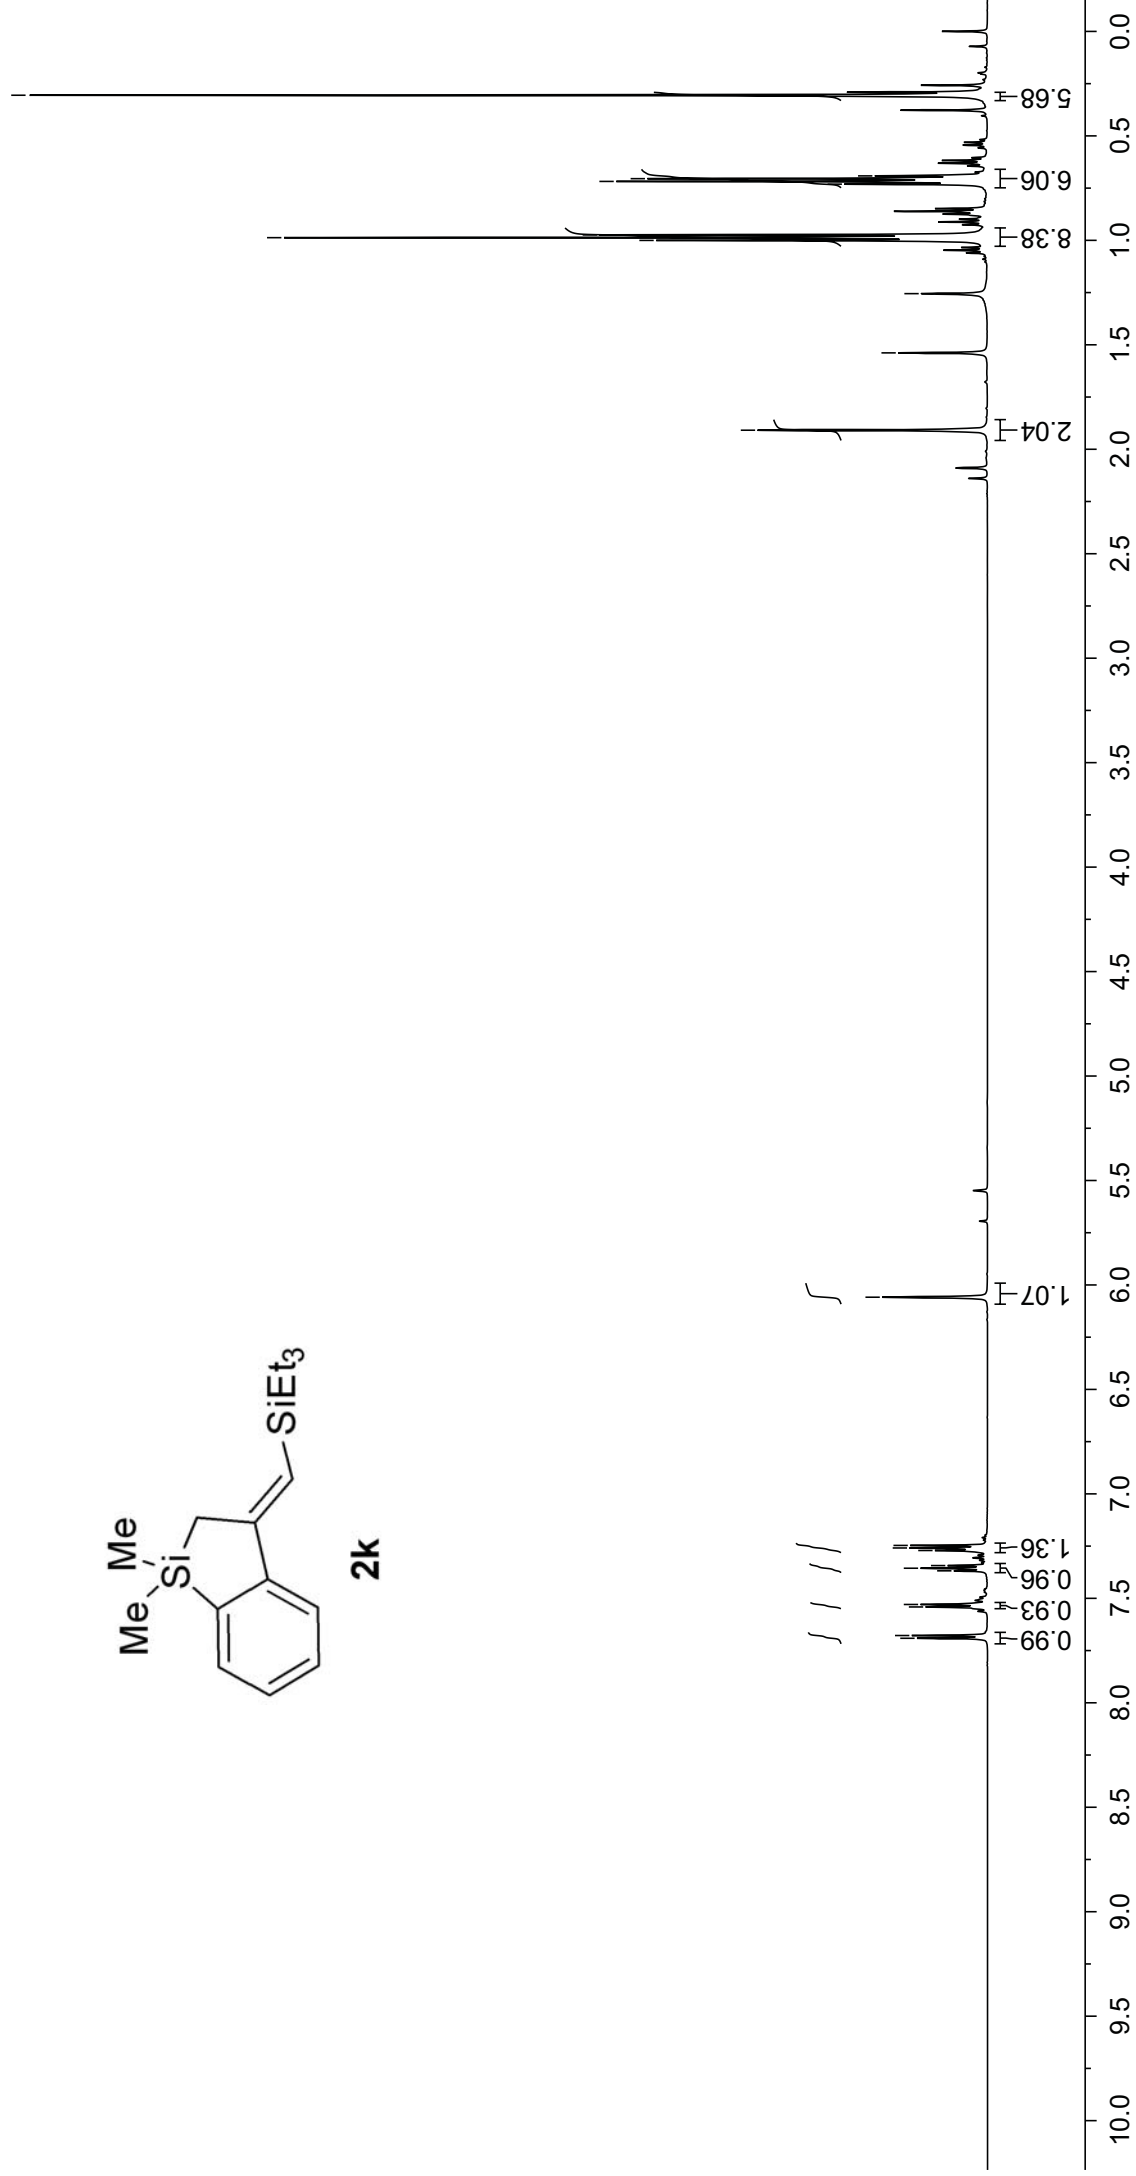

Lin-7-44-3a C13  
CDCI3 150HMZ

—157.457  
—151.347  
—140.740  
—131.979  
—129.593  
—127.529  
—122.185  
—118.096

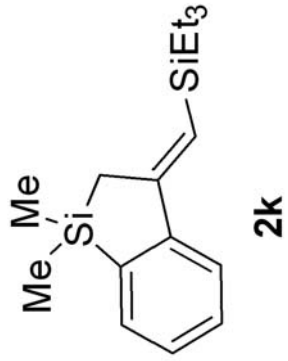

—77.212  
—77.000  
—76.789

—22.609

—7.683  
—4.550

—2.223

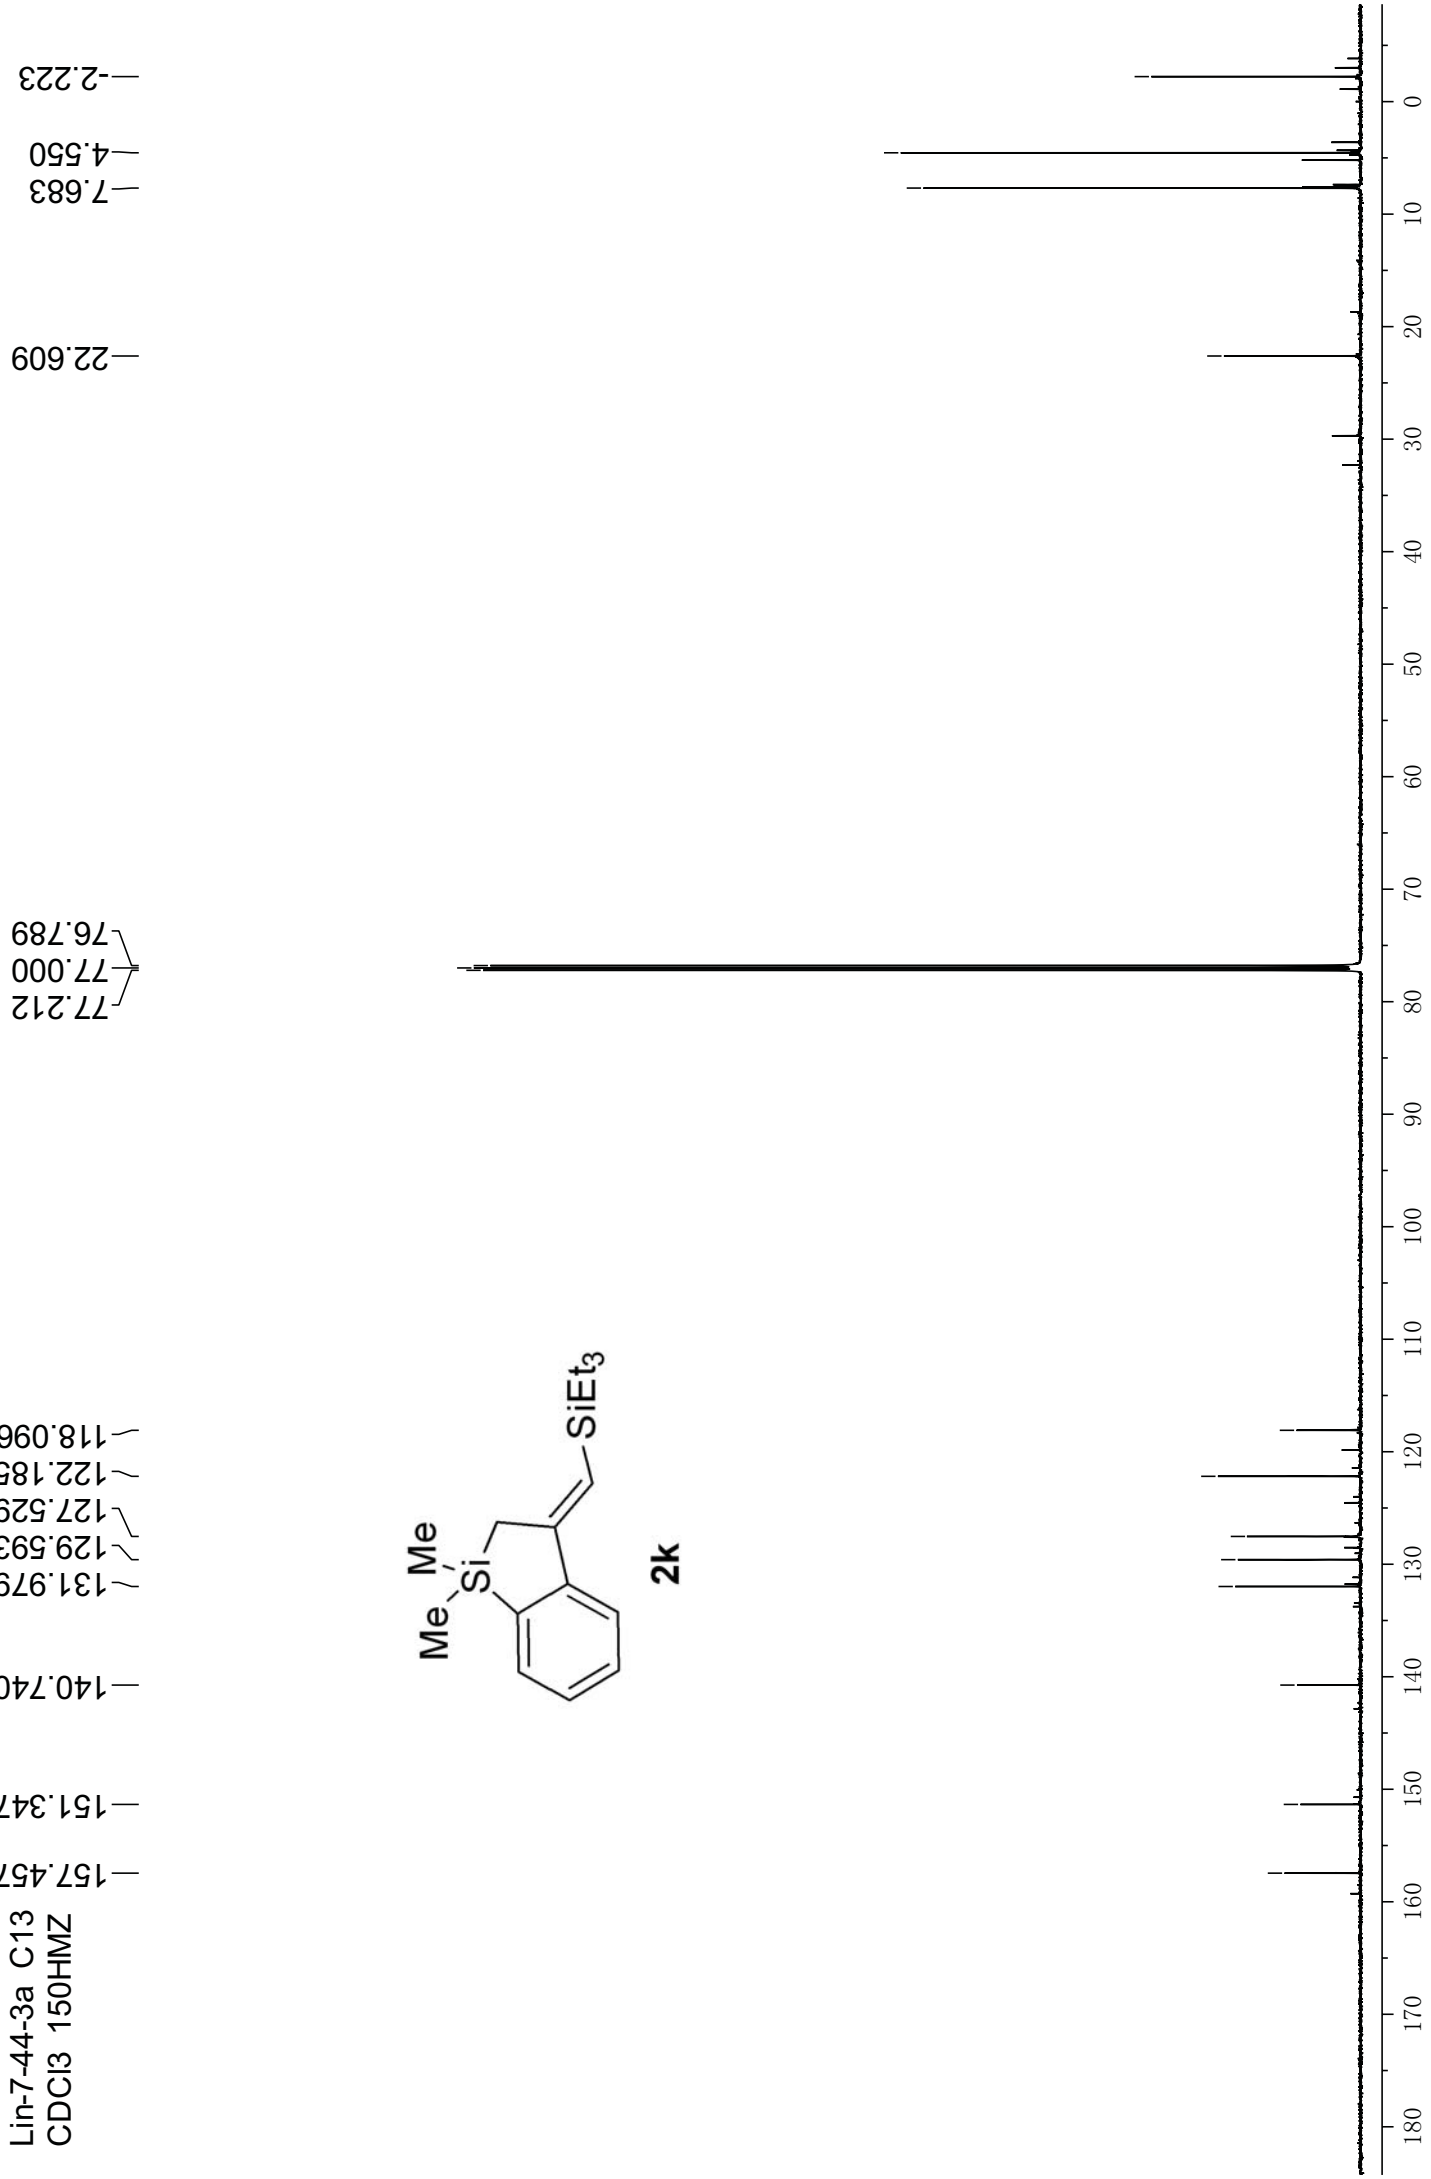

Lin-7-33-2a H1

CDCI3 400MHZ

7.552  
7.534  
7.353  
7.339  
7.248  
7.232  
7.217  
7.198  
7.179  
7.161  
7.143  
7.045  
7.026  
7.007  
6.629

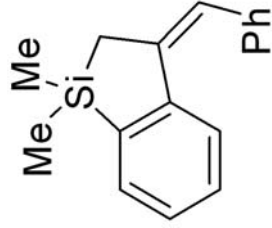

3a

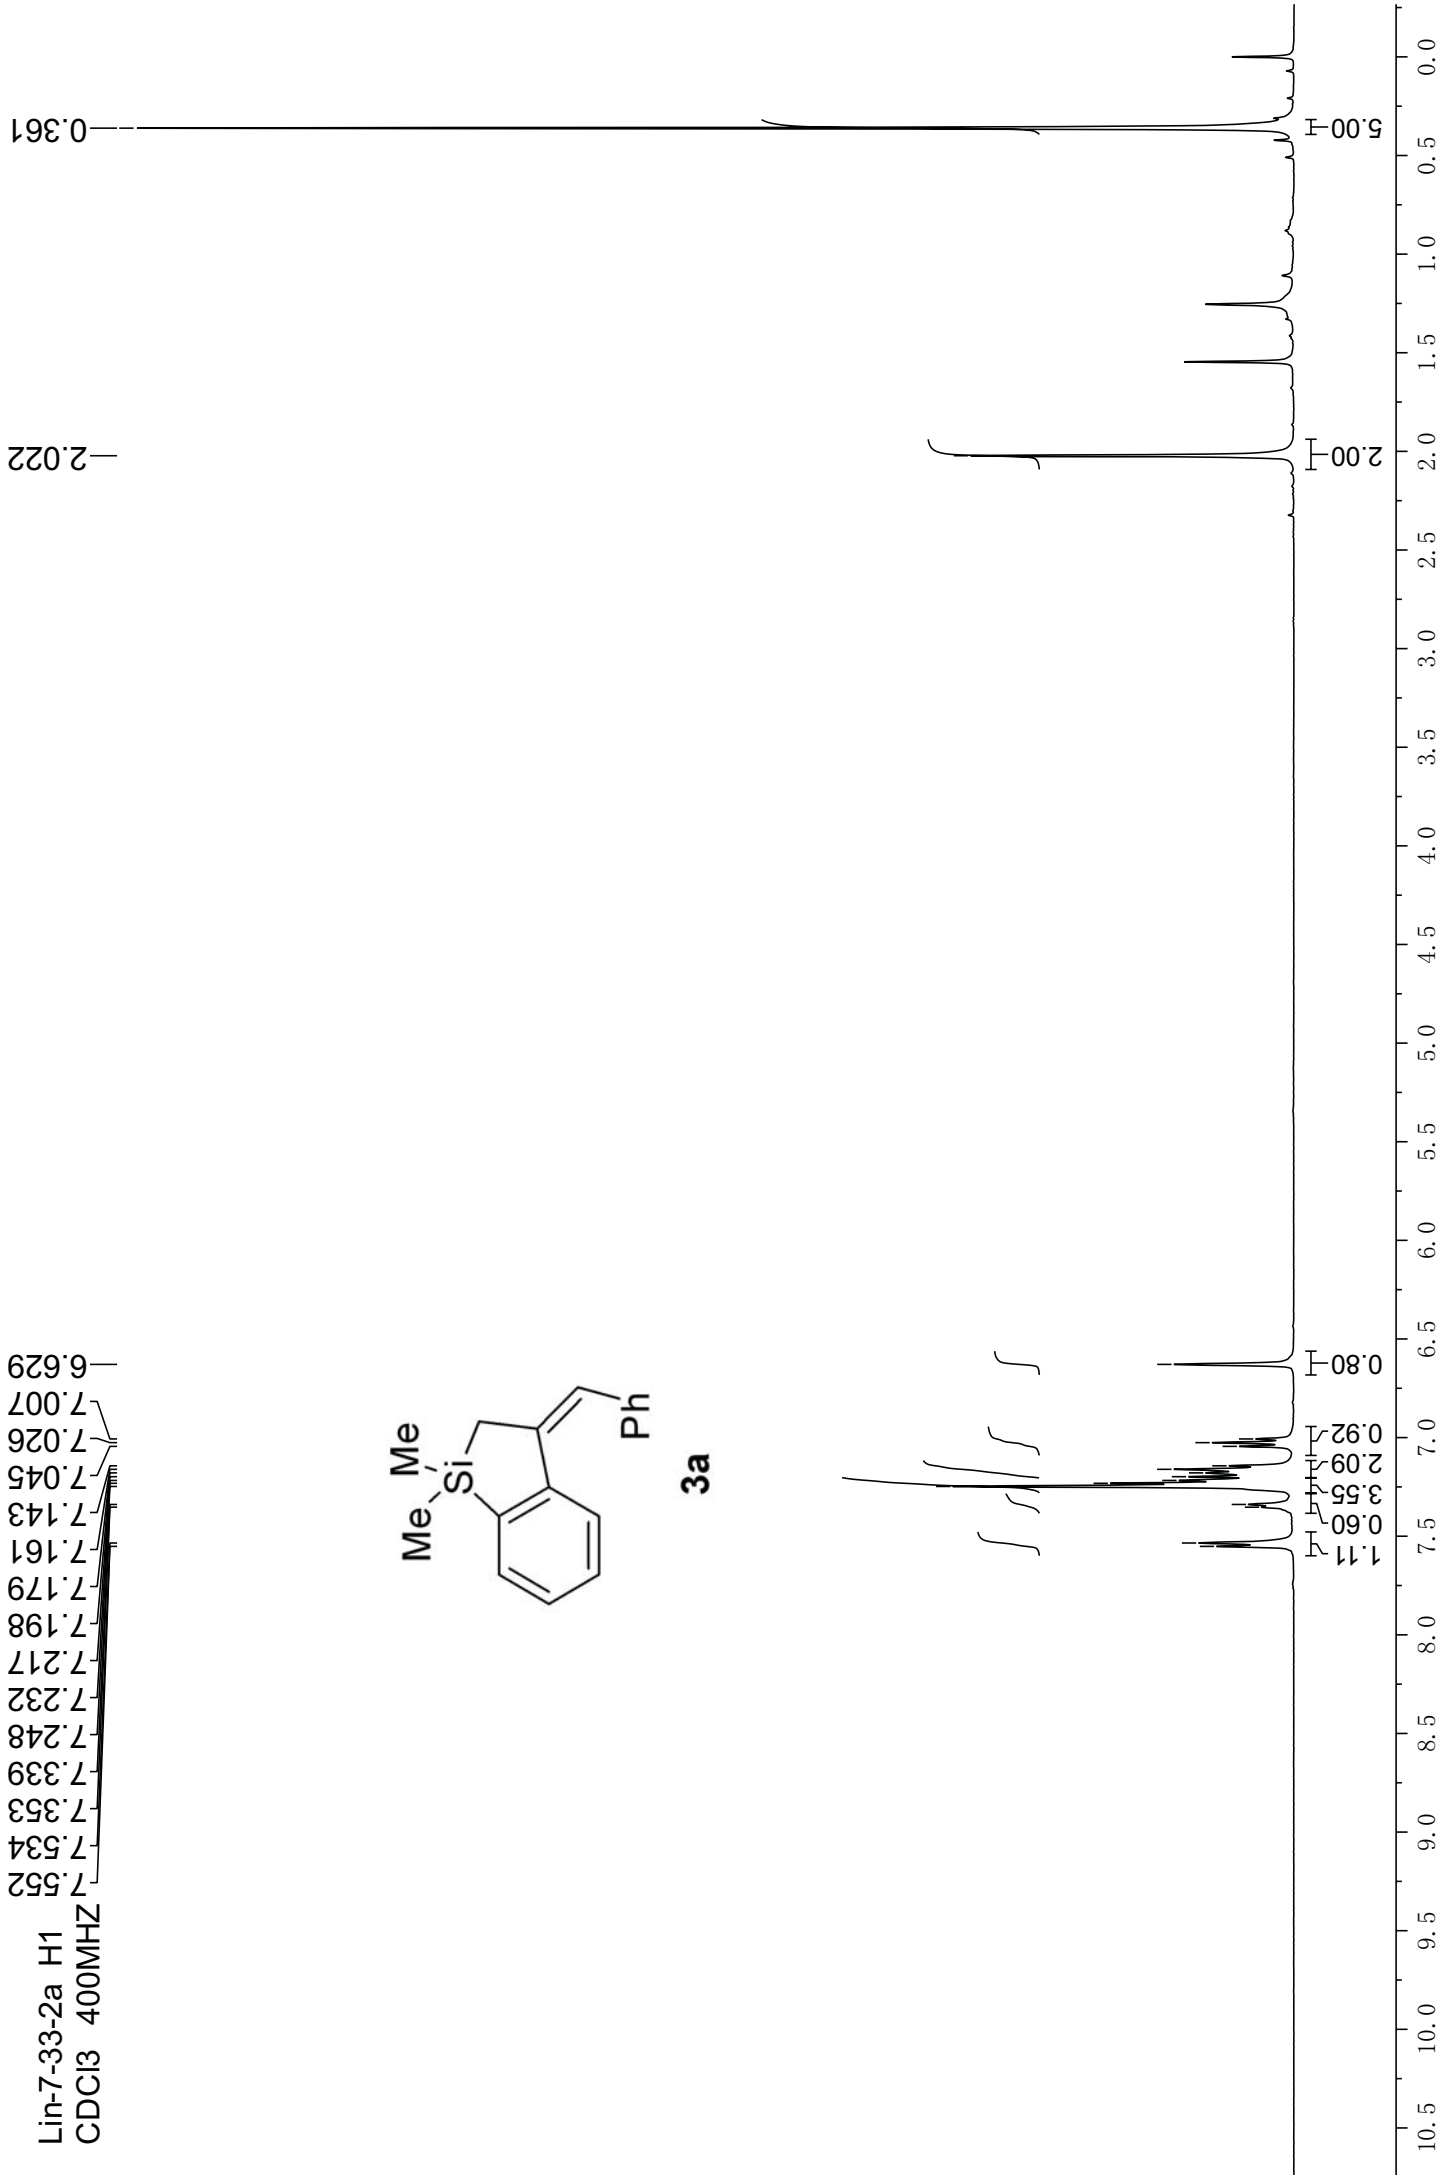

Lin-7-100-4 NOEDS 6.66  
CDCI3 400MHZ

7.283  
7.275  
7.263  
7.259  
7.191  
7.058  
6.661

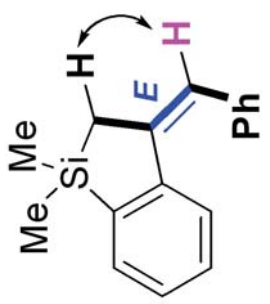

NOE of 3a

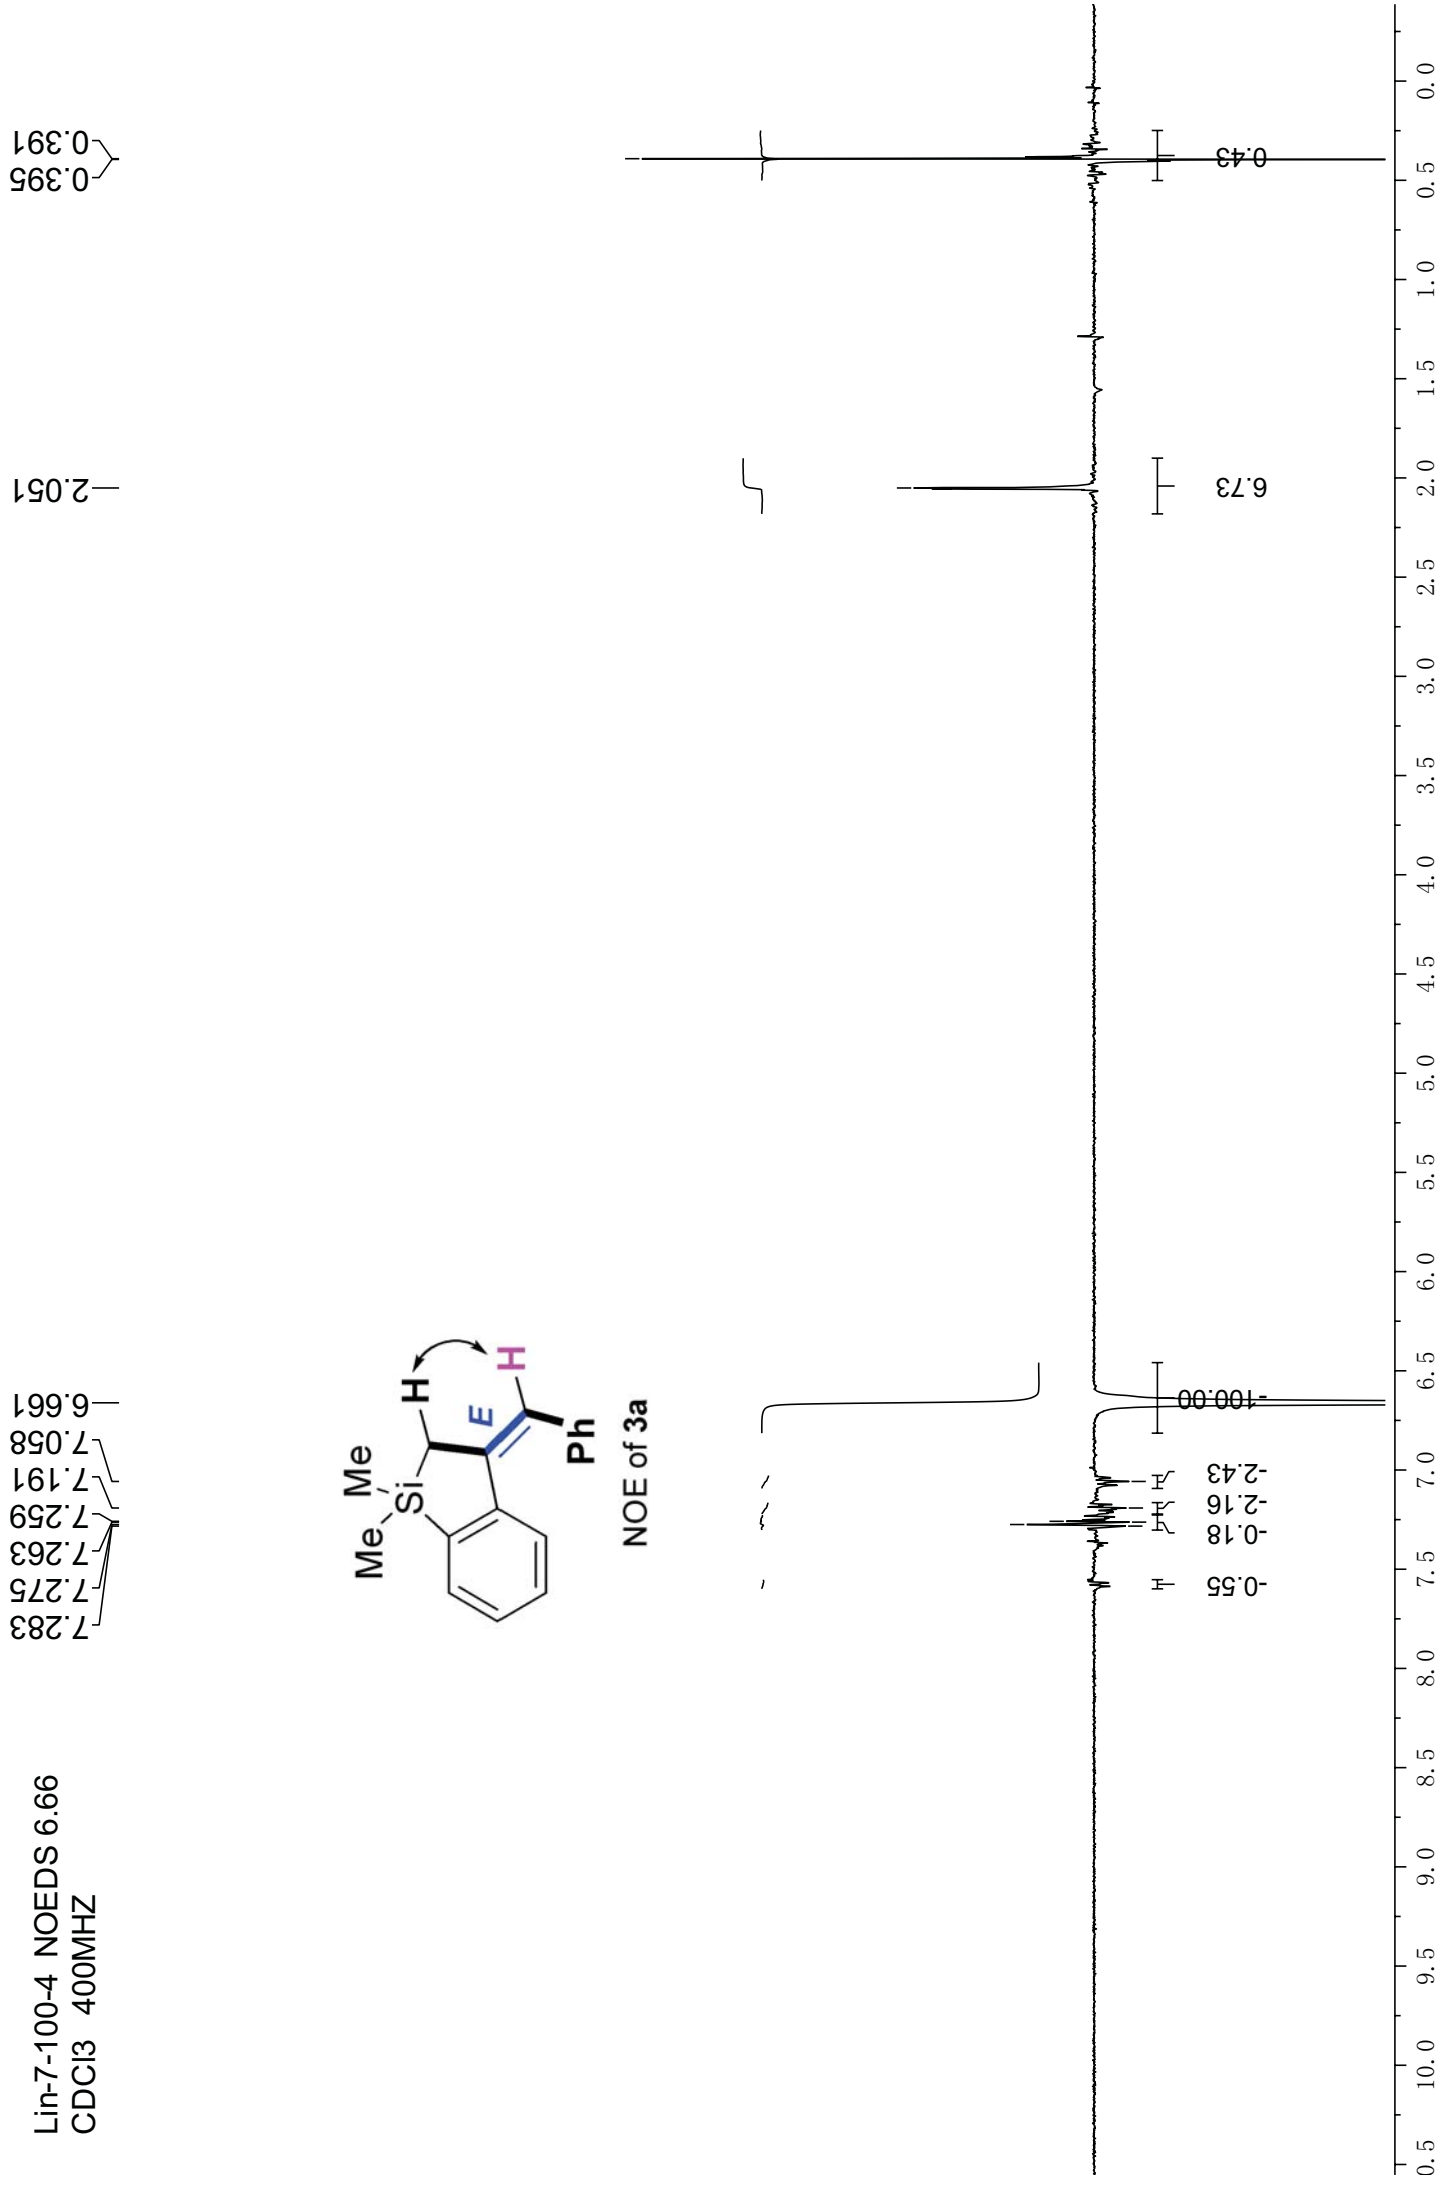

Lin-7-33-2a C13  
CDCI3 150MHZ

148.194  
143.997  
141.712  
138.835  
132.046  
128.630  
128.238  
128.189  
127.023  
126.634  
126.216  
123.930

77.212  
77.000  
76.788

27.961

2.688

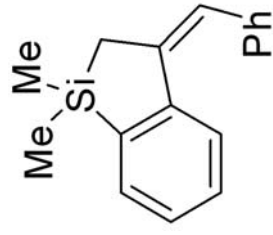

3a

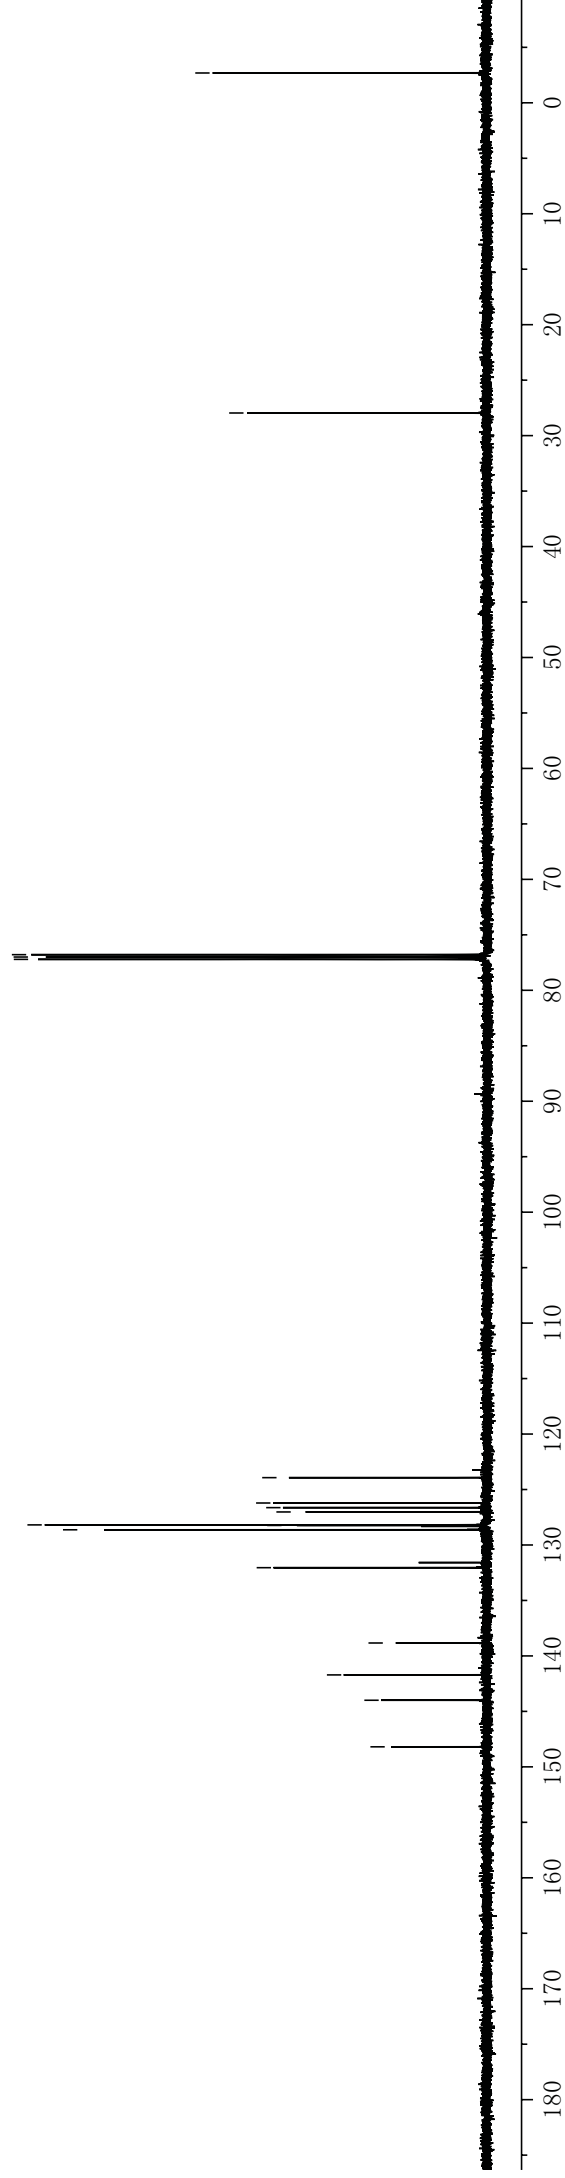



Lin-7-120-2R H1  
CDCI3 400MHZ

7.782  
7.762  
7.604  
7.588  
7.569  
7.420  
7.412  
7.393  
7.374  
7.321  
7.303  
7.263  
7.244  
7.085

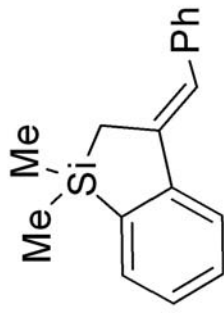

**3a-Z**

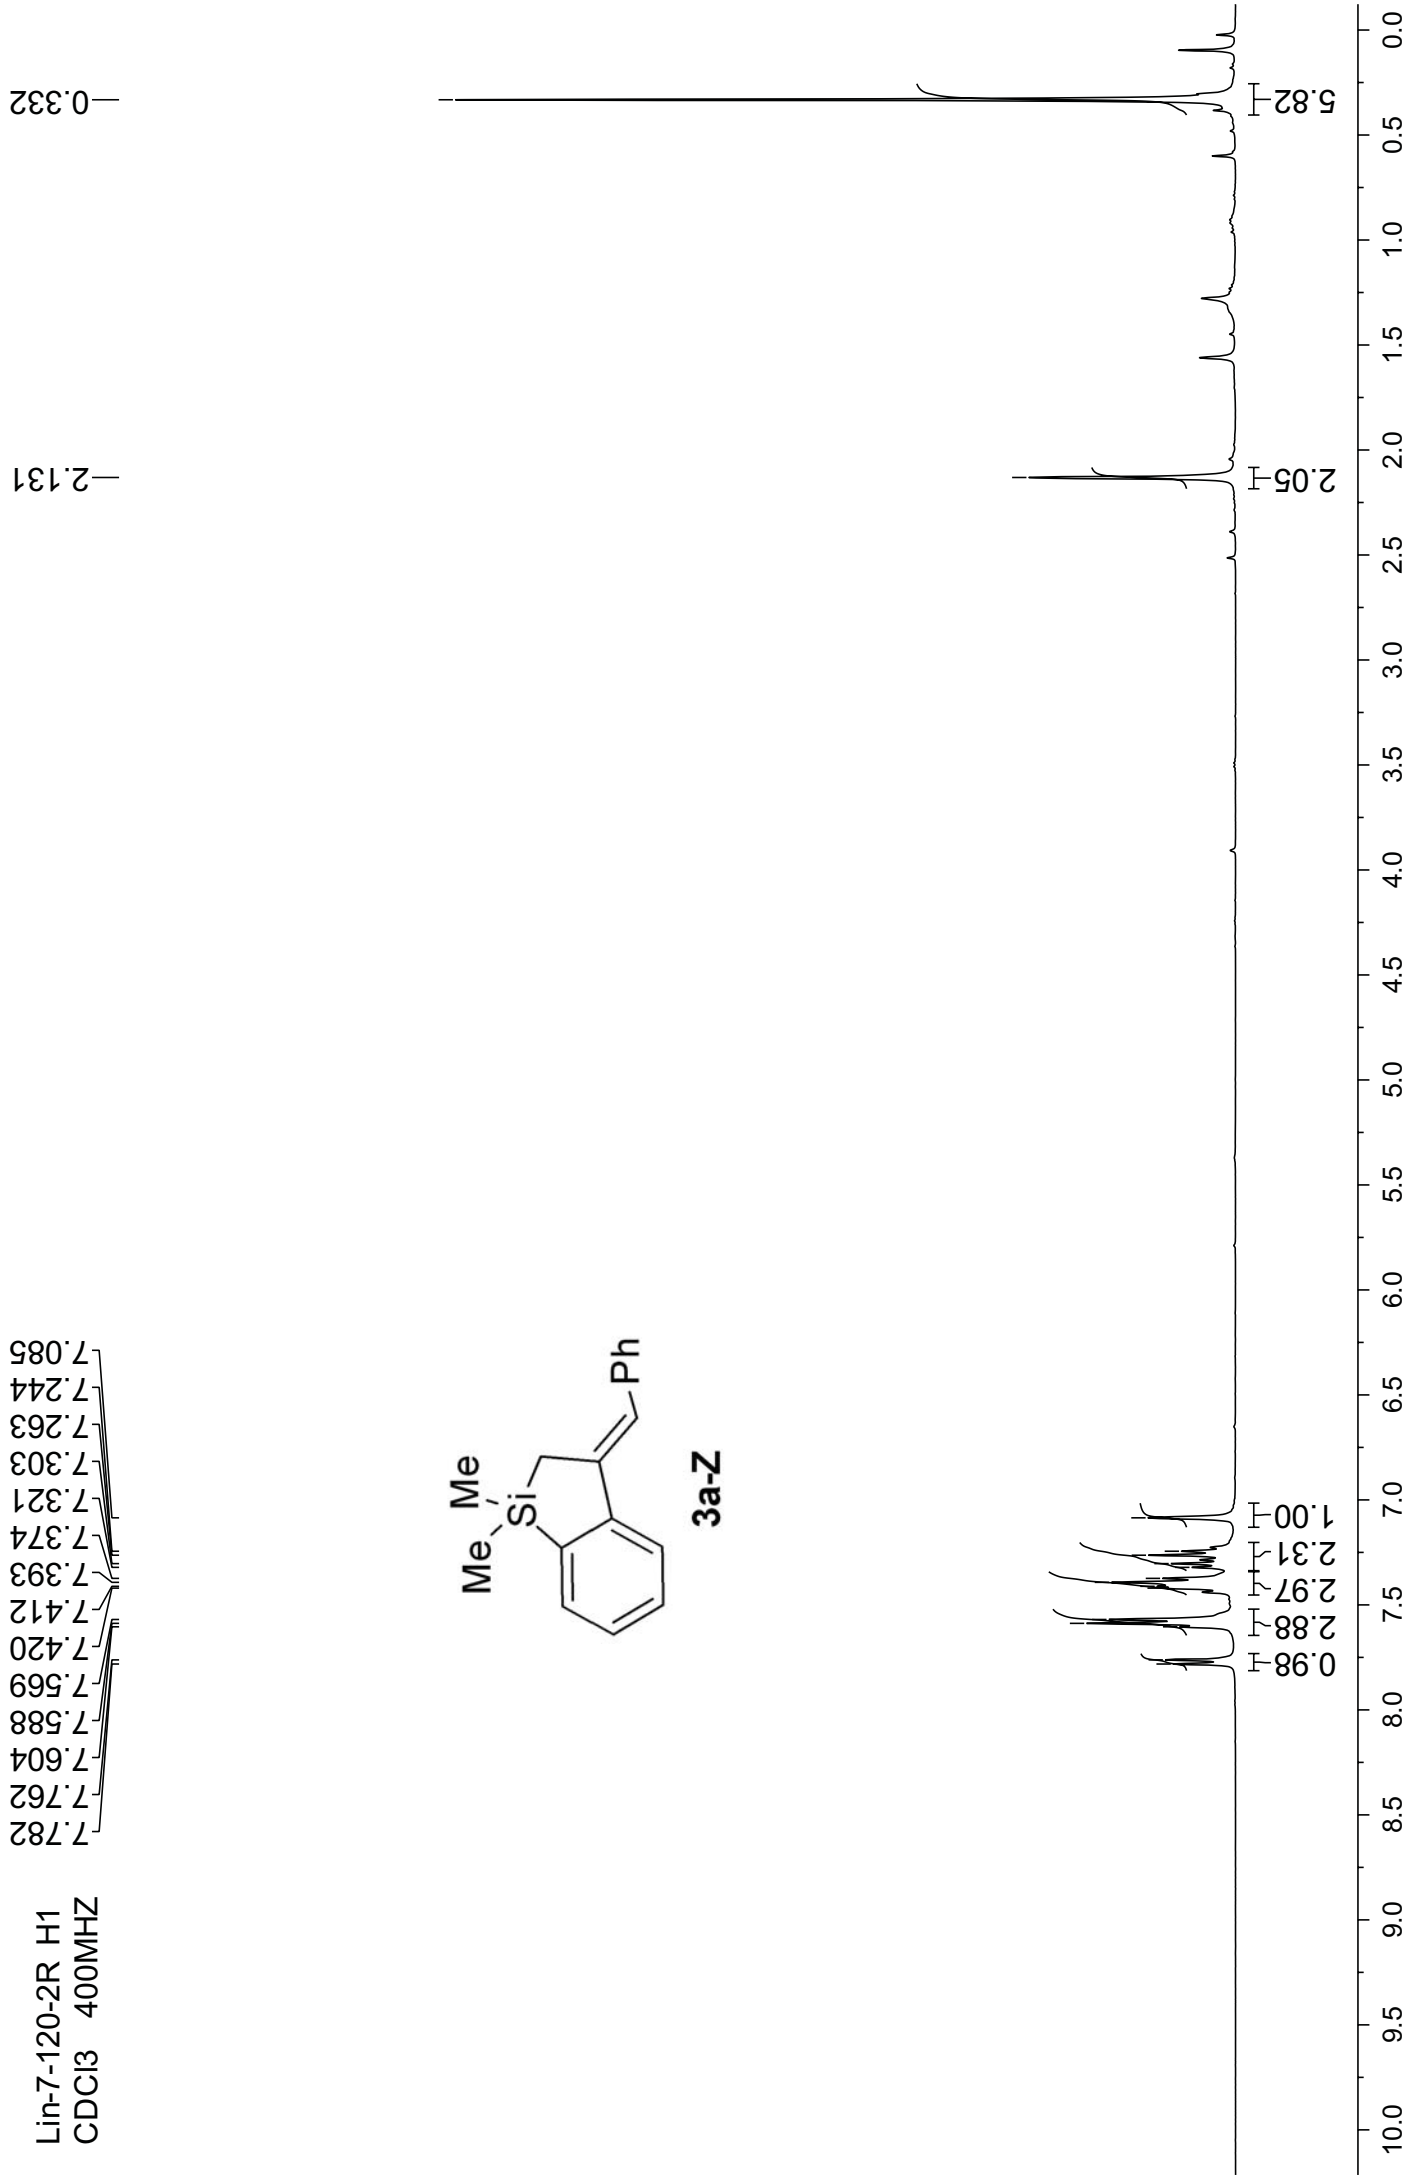

Lin-7-120-2R NOEDS 7.09  
CDCI3 400MHZ

7.782  
7.762  
7.588  
7.569  
7.086

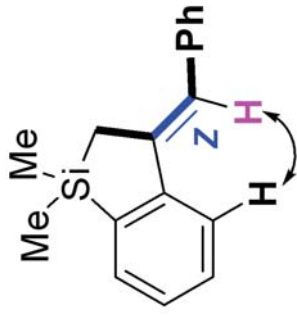

NOE of 3a-Z

0.335  
0.330

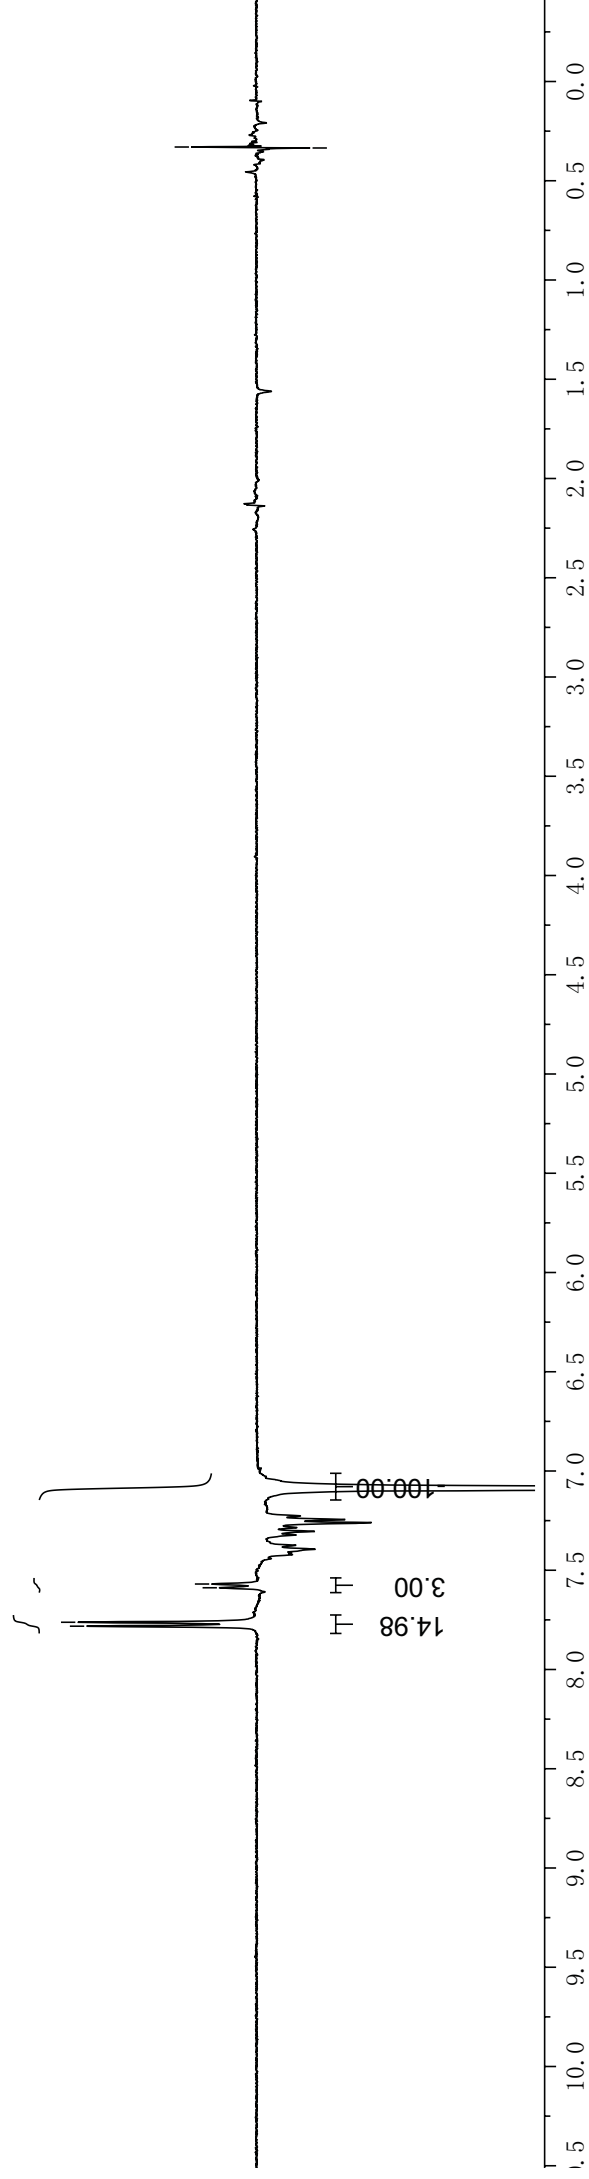

Lin-7-120-2R C13  
CDCI3 100MHZ

151.290  
142.246  
140.712  
138.788  
132.143  
129.829  
129.165  
128.170  
127.432  
126.285  
123.450  
121.842

77.317  
77.000  
76.684

19.880

1.936

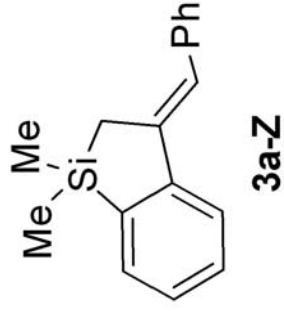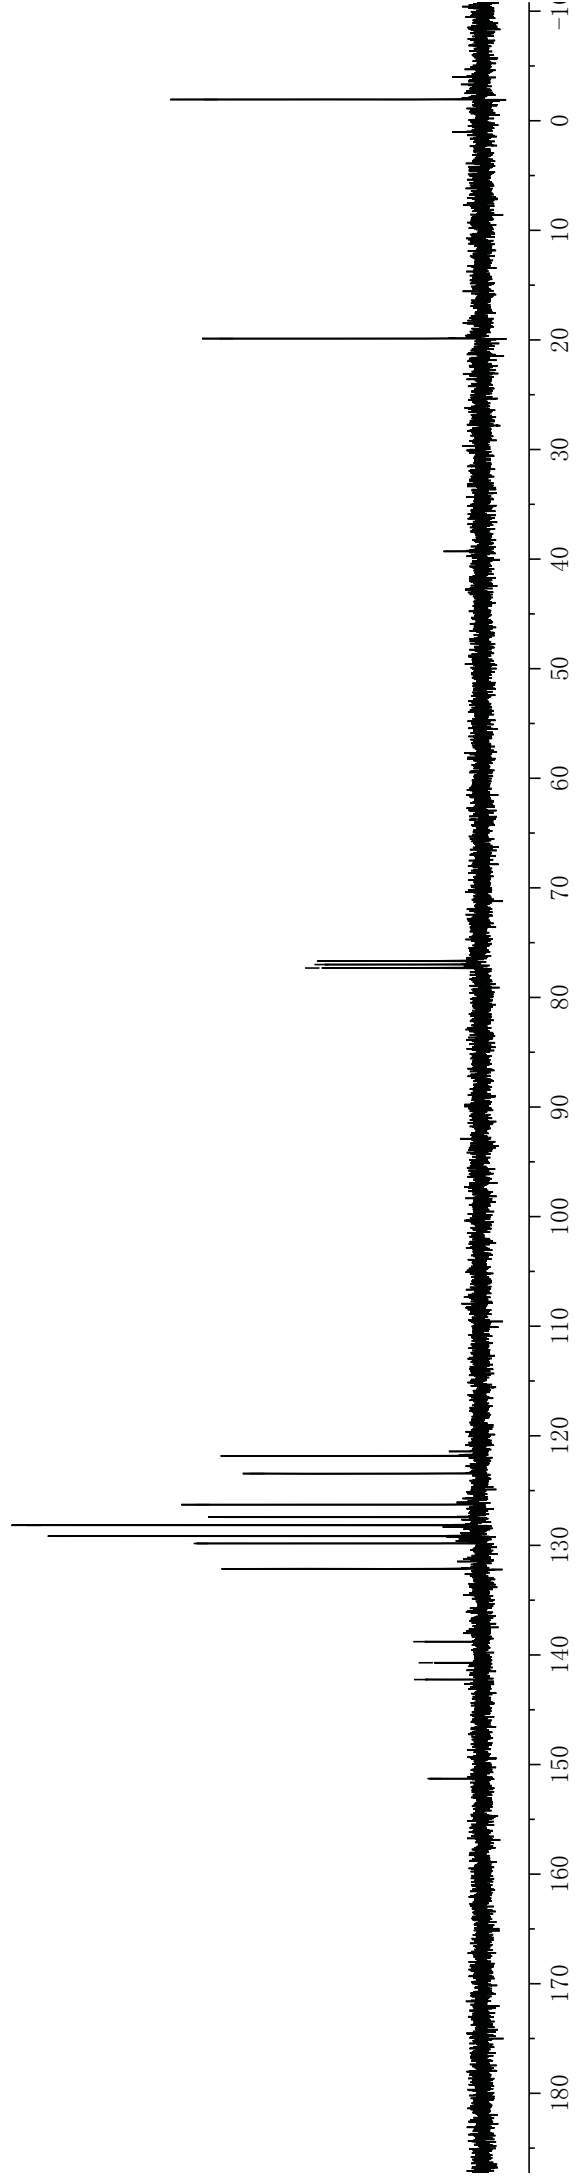

Lin-7-61-6R H1  
CDC13 400MHZ

7.565  
7.547  
7.260  
7.224  
7.209  
7.203  
7.195  
7.189  
7.178  
7.159  
7.070  
7.051  
7.032  
6.952  
6.930  
6.909  
6.576

2.019  
2.016

0.368

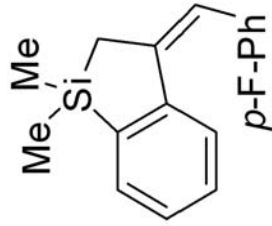

**3b**

Handwritten annotations: a vertical line at approximately 7.2 ppm and a horizontal line at approximately 1.9 ppm.

Integration values: 1.37, 3.89, 1.25, 1.89, 1.00

2.60

6.21

10.0 9.5 9.0 8.5 8.0 7.5 7.0 6.5 6.0 5.5 5.0 4.5 4.0 3.5 3.0 2.5 2.0 1.5 1.0 0.5 0.0

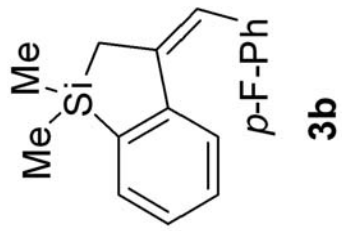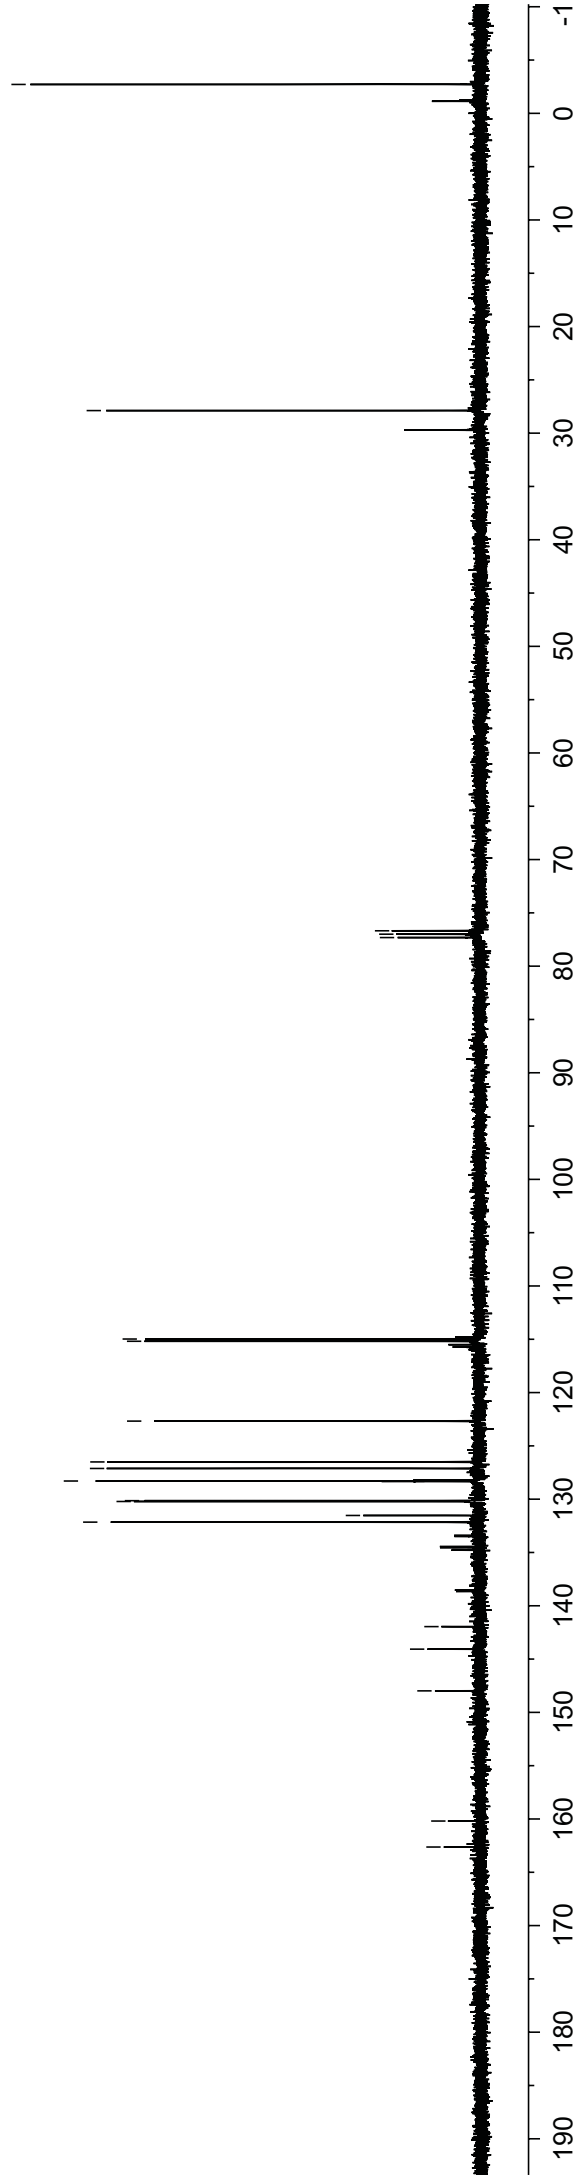

Lin-7-87-2 C13  
CDC13 100MHZ

162.631  
160.194  
147.982  
144.068  
141.955  
132.154  
130.217  
130.141  
128.297  
127.119  
126.507  
115.188  
114.977

77.317  
77.000  
76.682

27.883

-2.711

Lin-7-61-7R H1  
CDCI3 400MHZ

7.286  
7.266  
7.260  
7.187  
7.170  
7.152  
7.062  
7.048  
7.042  
7.033  
6.607

2.337  
2.022  
2.018

0.367

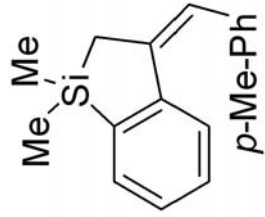

**3c**

0.94  
0.90  
2.90  
2.82  
1.00

3.31

2.39

6.26

10.0 9.5 9.0 8.5 8.0 7.5 7.0 6.5 6.0 5.5 5.0 4.5 4.0 3.5 3.0 2.5 2.0 1.5 1.0 0.5 0.0

Lin-7-87-1 C-13  
CDCI3 100MHZ

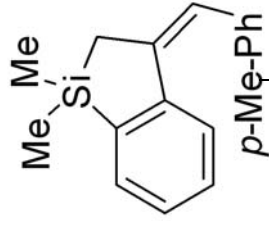

148.360  
143.958  
141.063  
135.823  
135.803  
132.017  
128.887  
128.466  
128.207  
126.906  
126.599  
123.939

77.319  
77.000  
76.684

27.896  
21.211

2.680

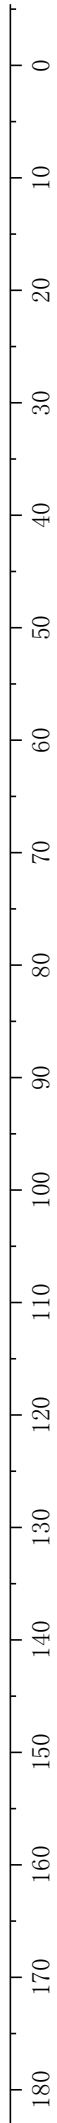

Lin-7-103-1b H1  
CDC13 400MHZ

8.588  
7.703  
7.626  
7.608  
7.386  
7.368  
7.331  
7.312  
7.285  
7.260  
7.152  
6.332

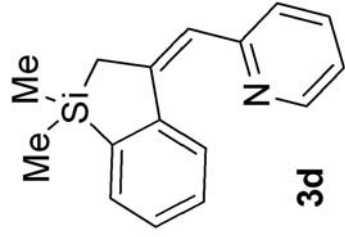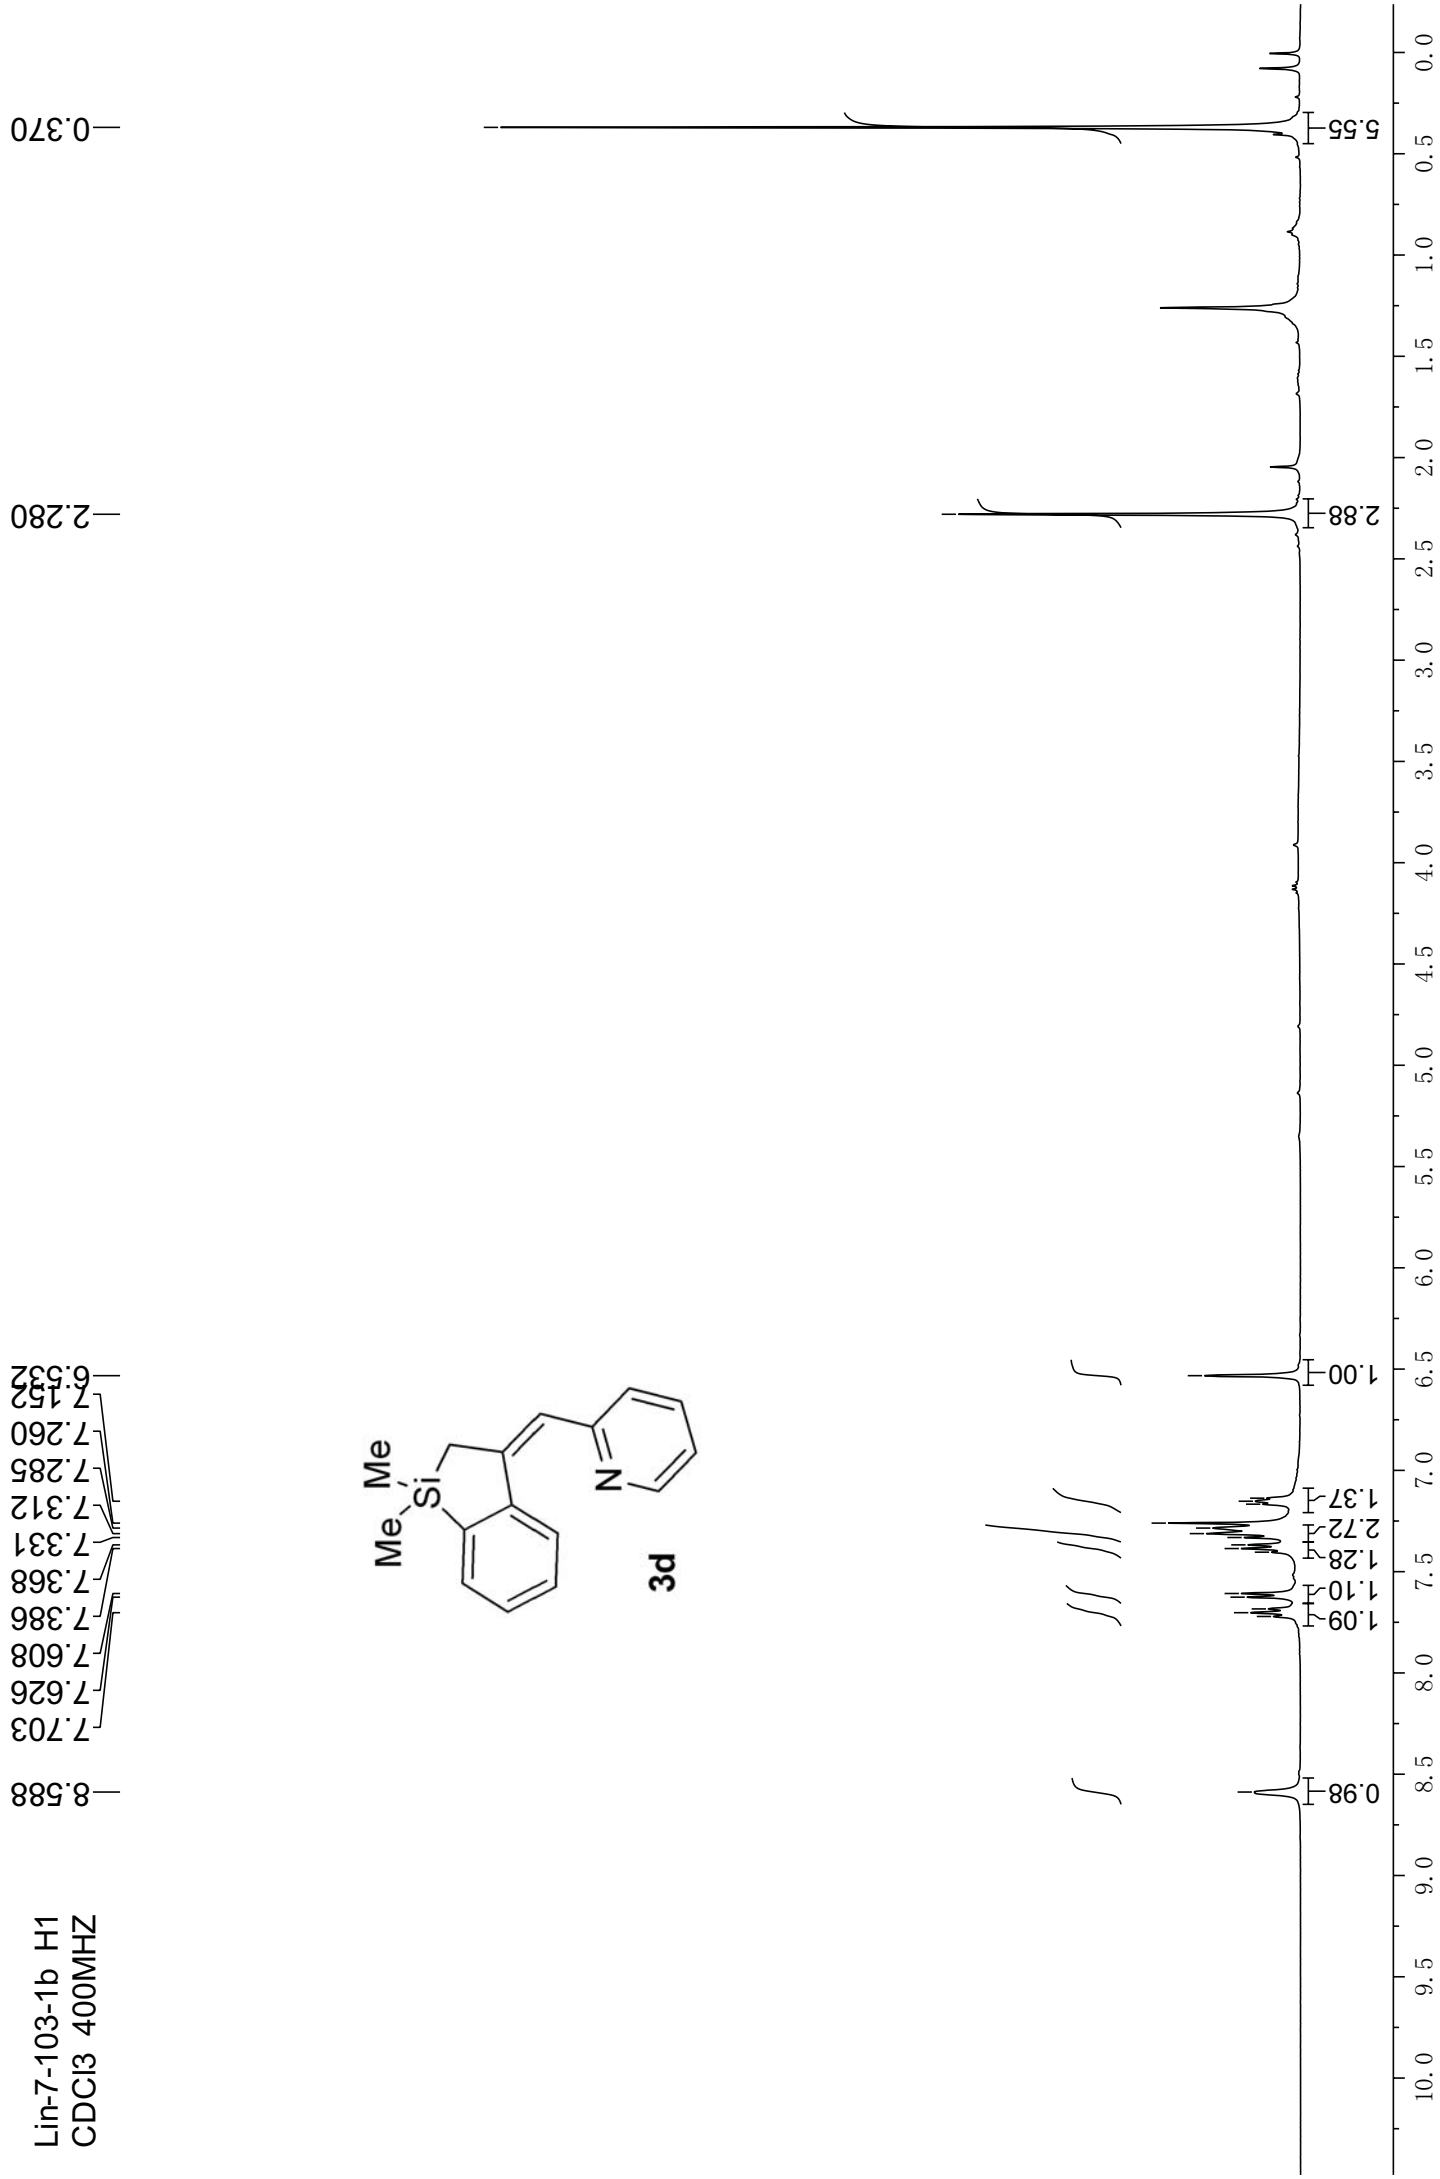



Lin-7-103-1b C13  
CDC13 100MHZ

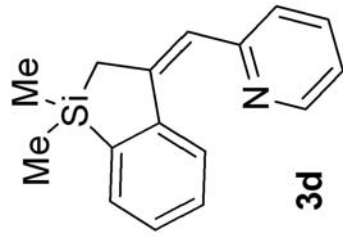

156.619  
151.421  
149.118  
146.361  
138.213  
136.484  
134.552  
128.897  
128.422  
126.746  
126.440  
123.899  
121.462

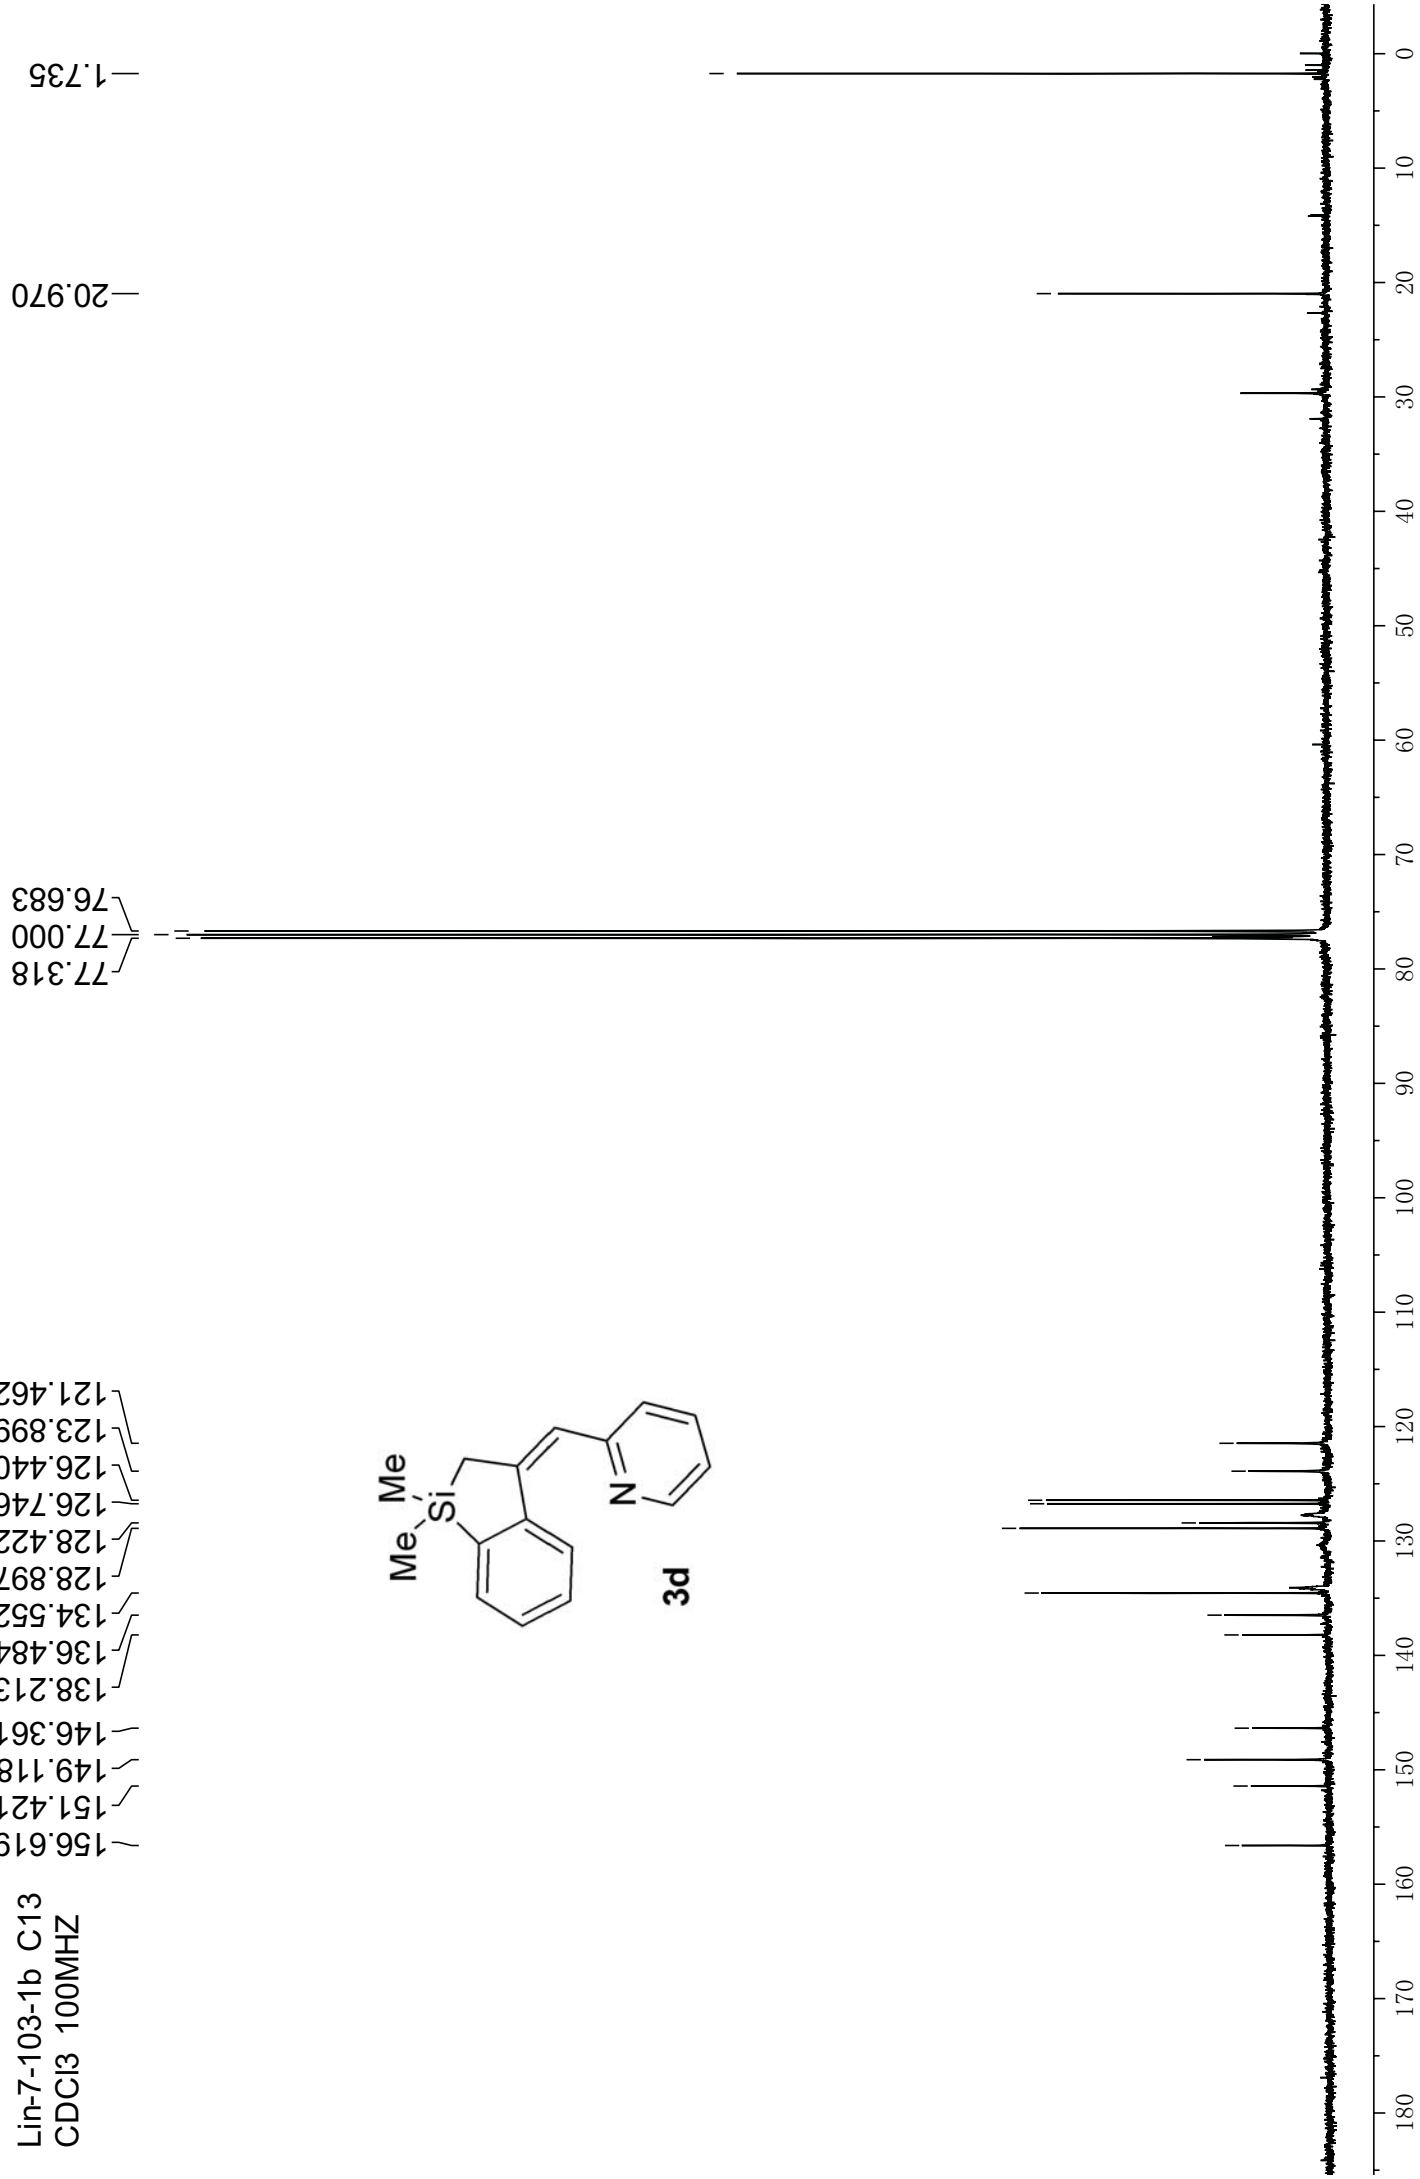

Lin-7-103-1a H1  
CDC13 400MHZ

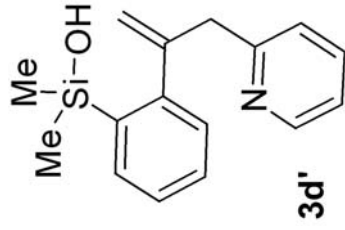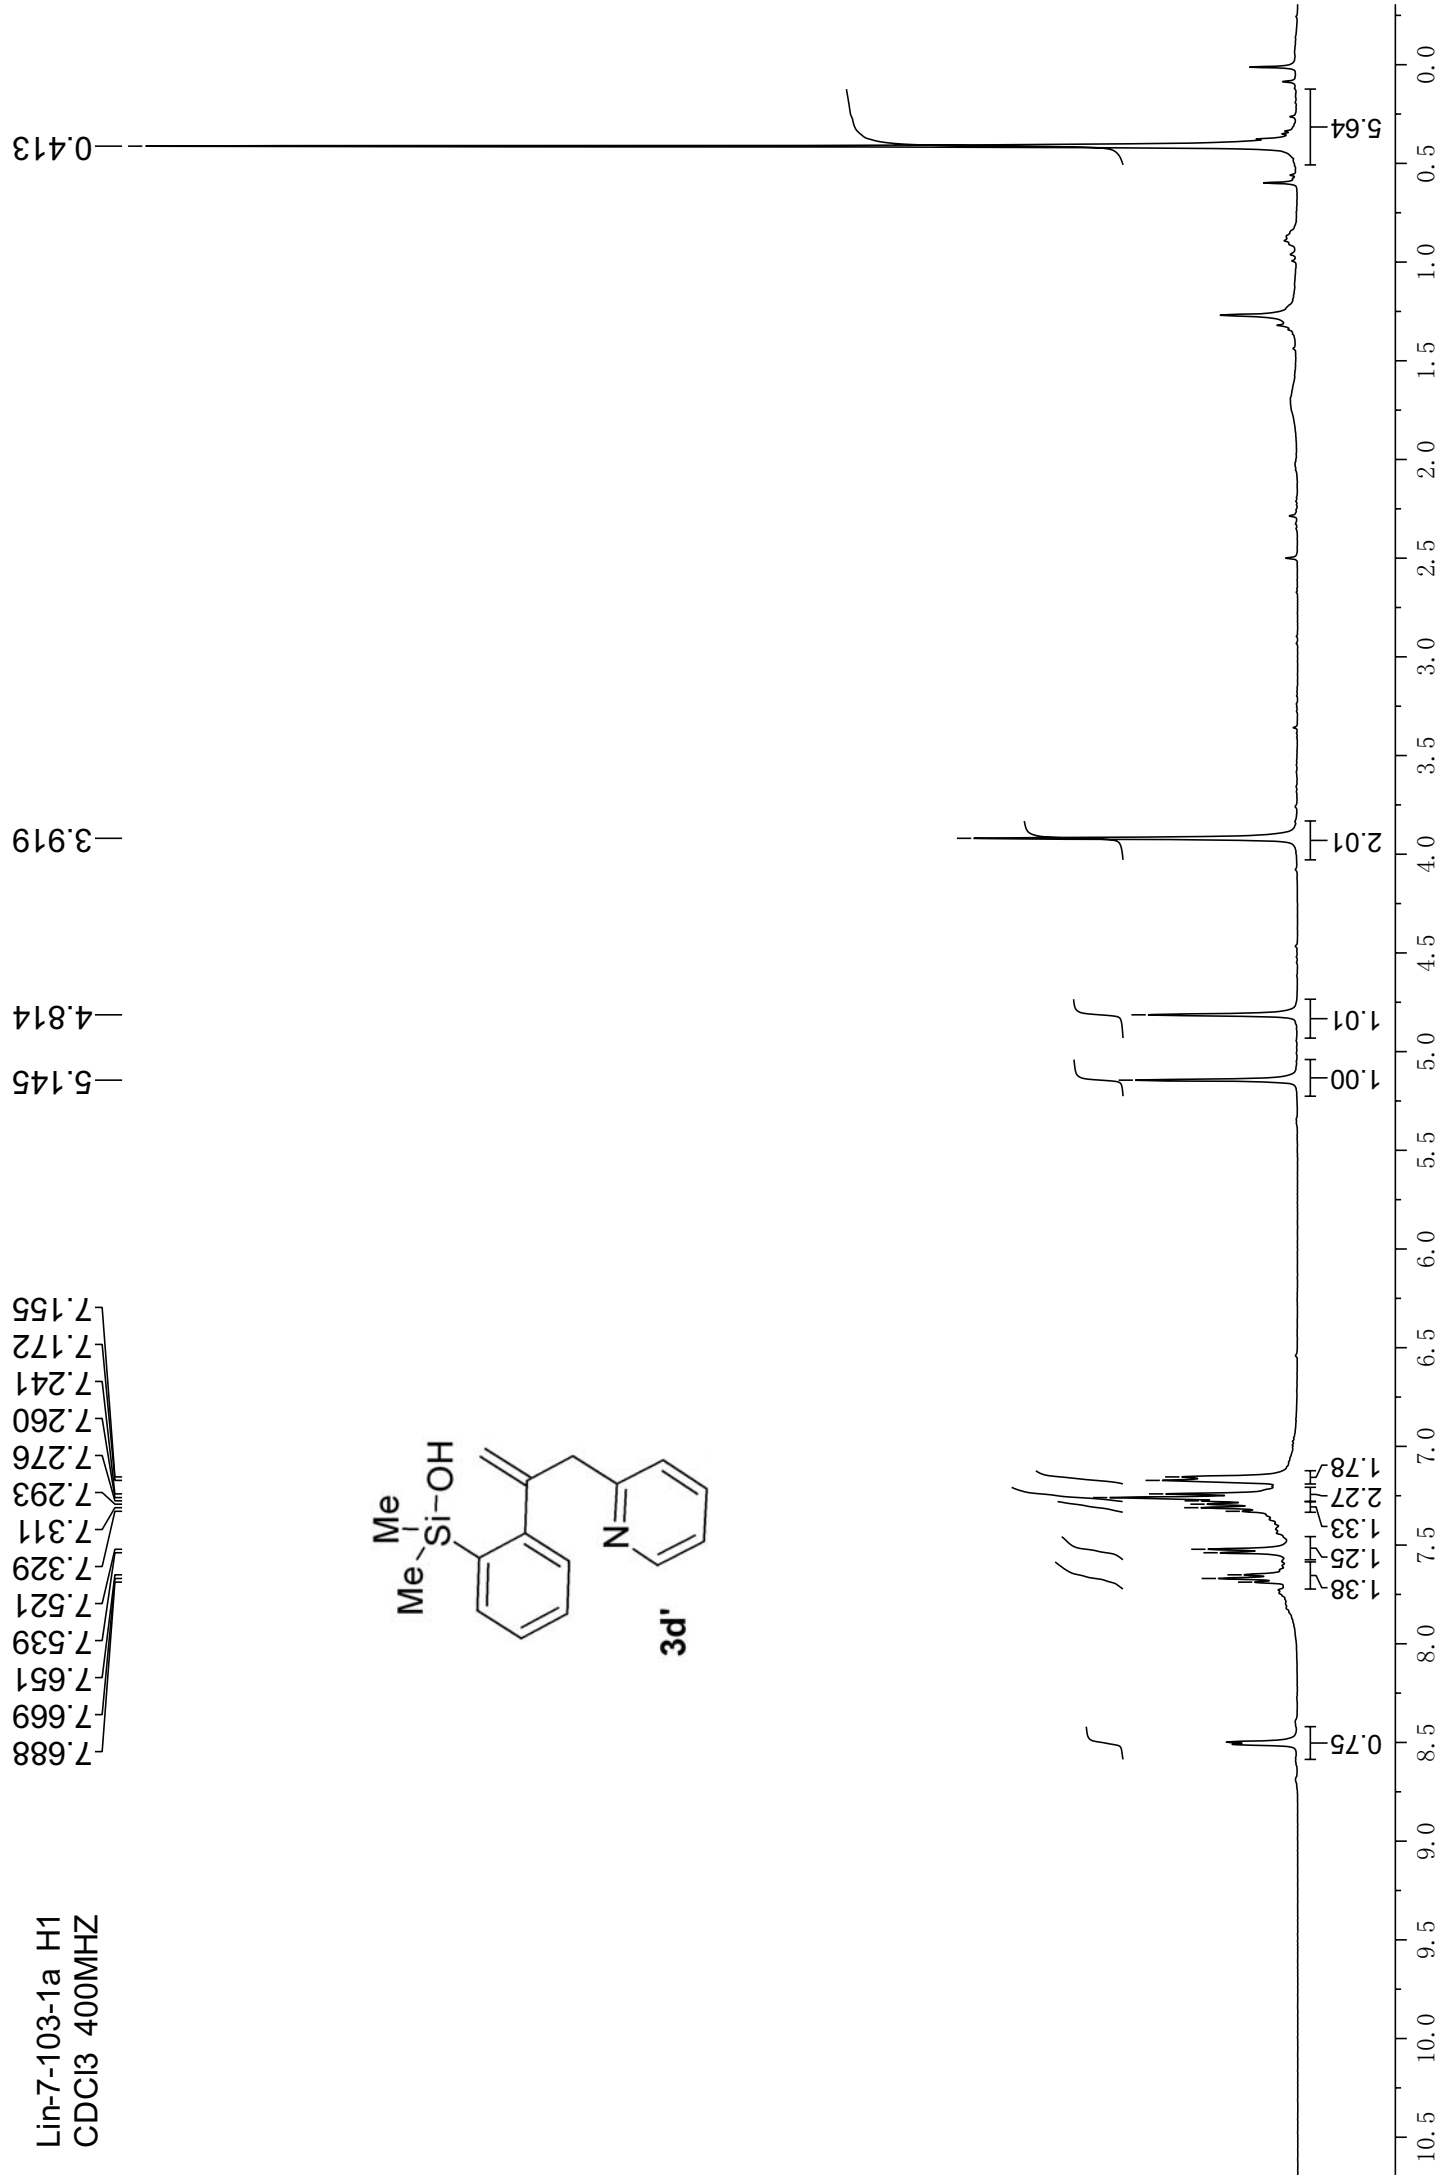

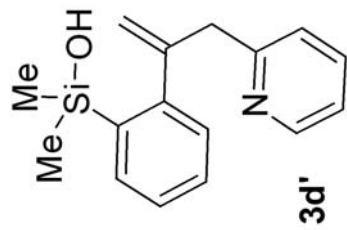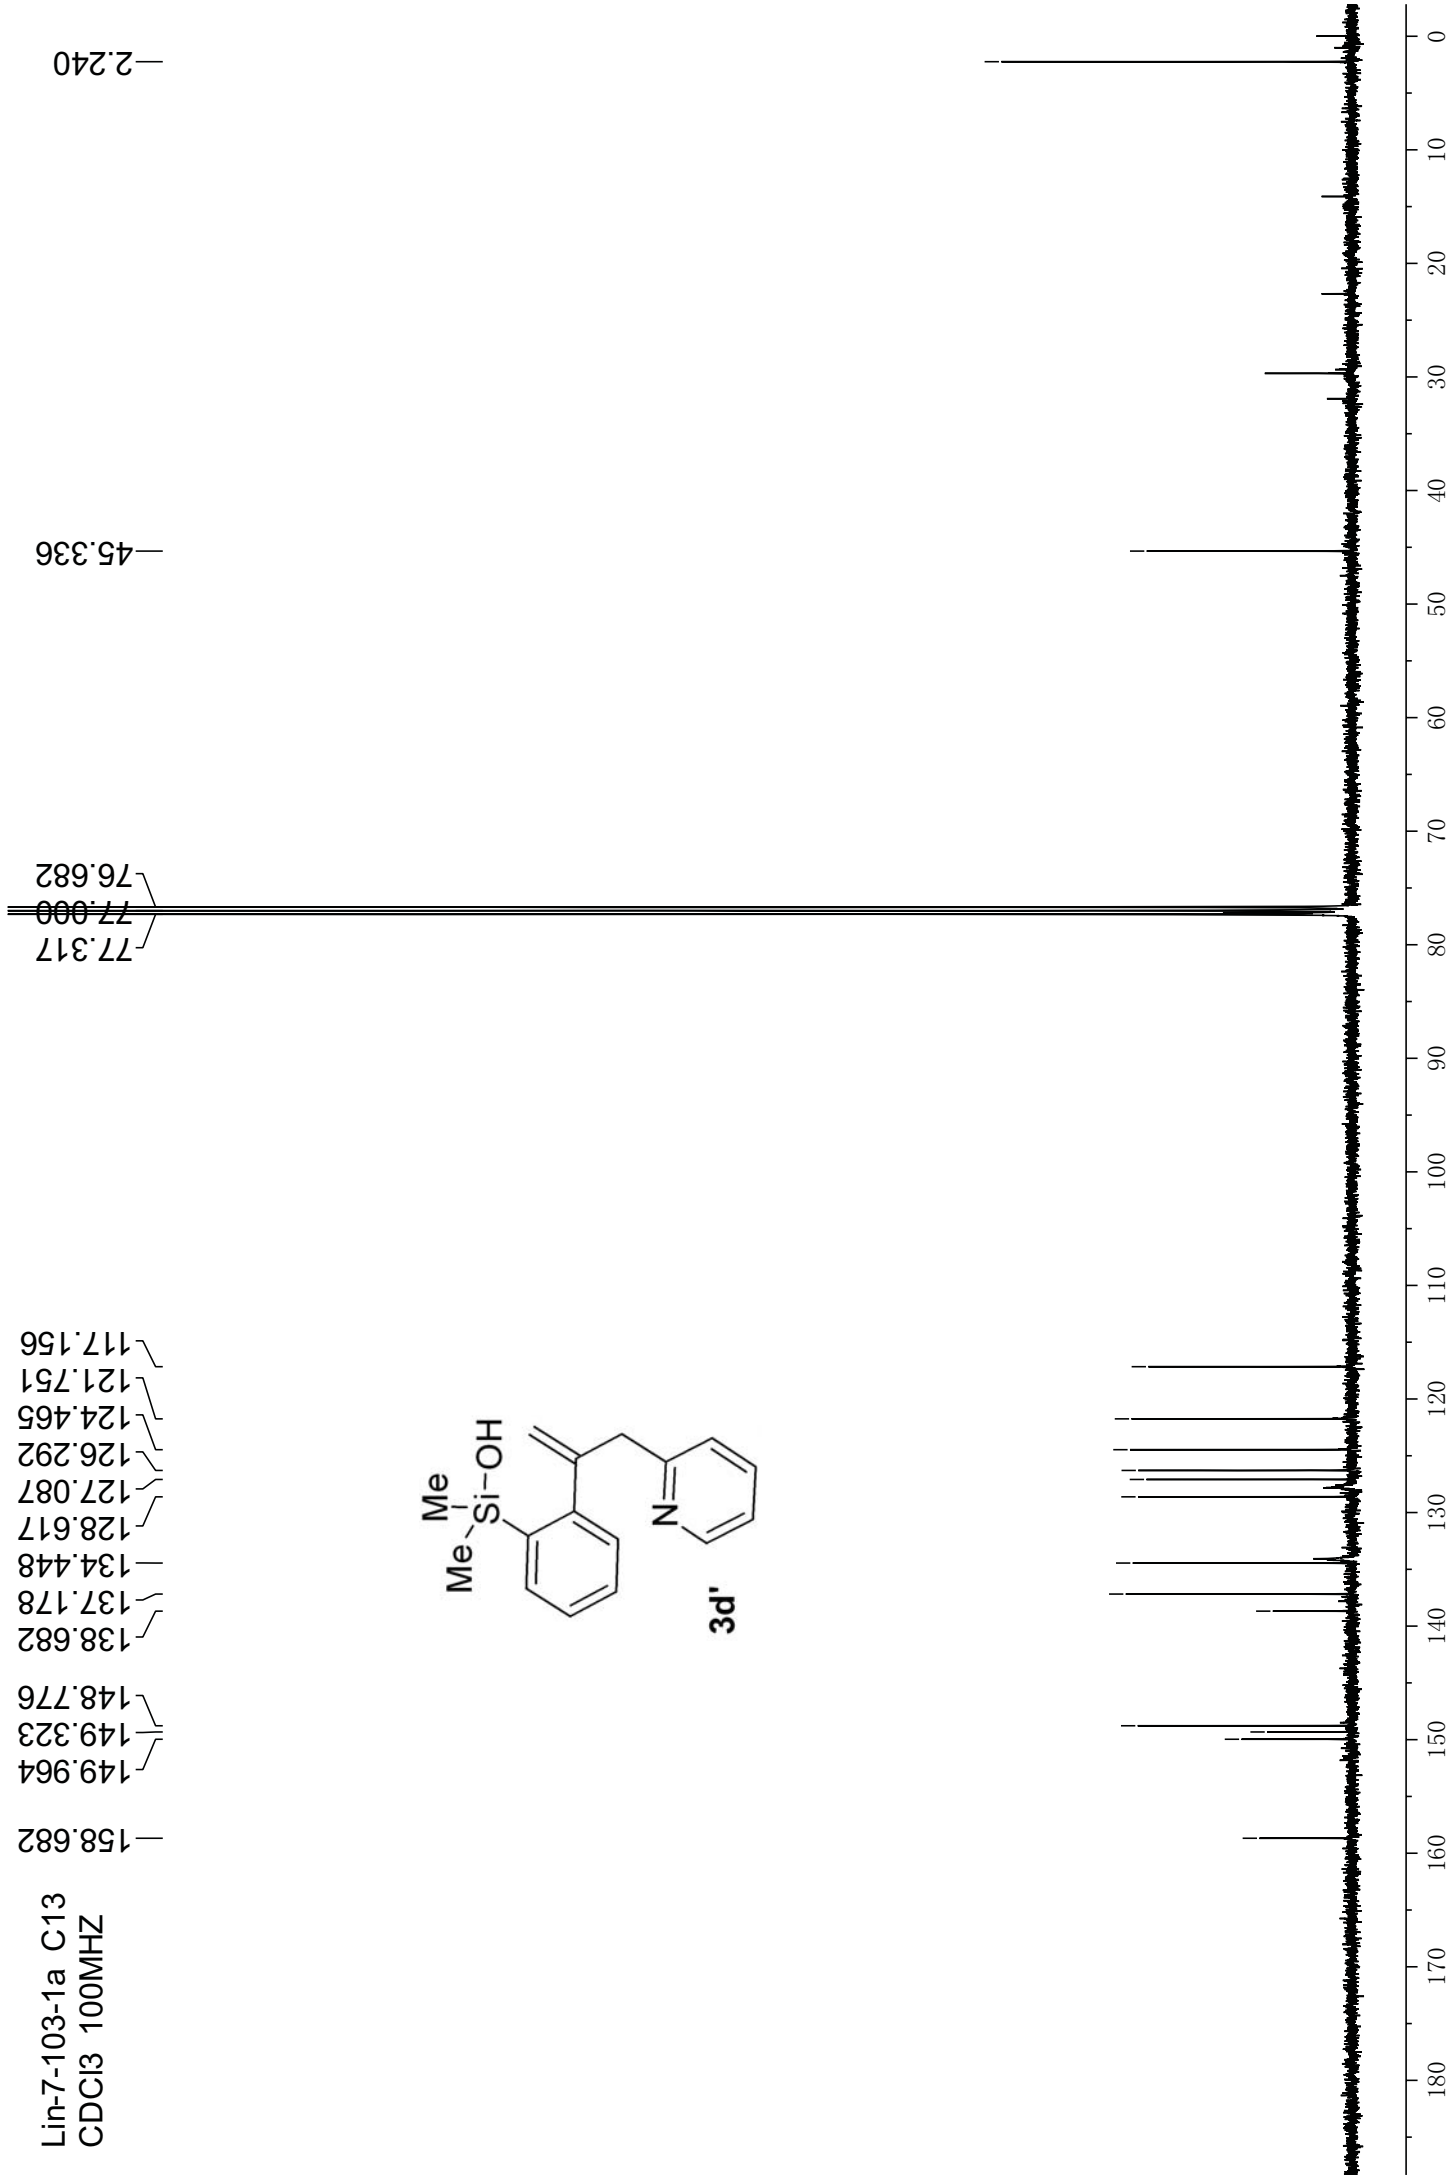

Lin-7-103-1a C13  
CDC13 100MHZ

Lin-7-103-1a DEPT135  
CDCI3 100MHZ

—148.780  
—137.178  
—134.450  
—128.618  
—127.088  
—126.293  
—124.466  
—121.752  
—117.156

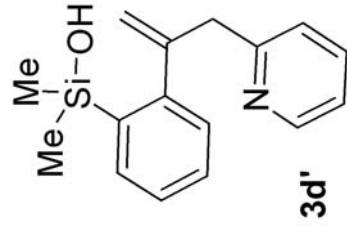

—45.339

—2.241

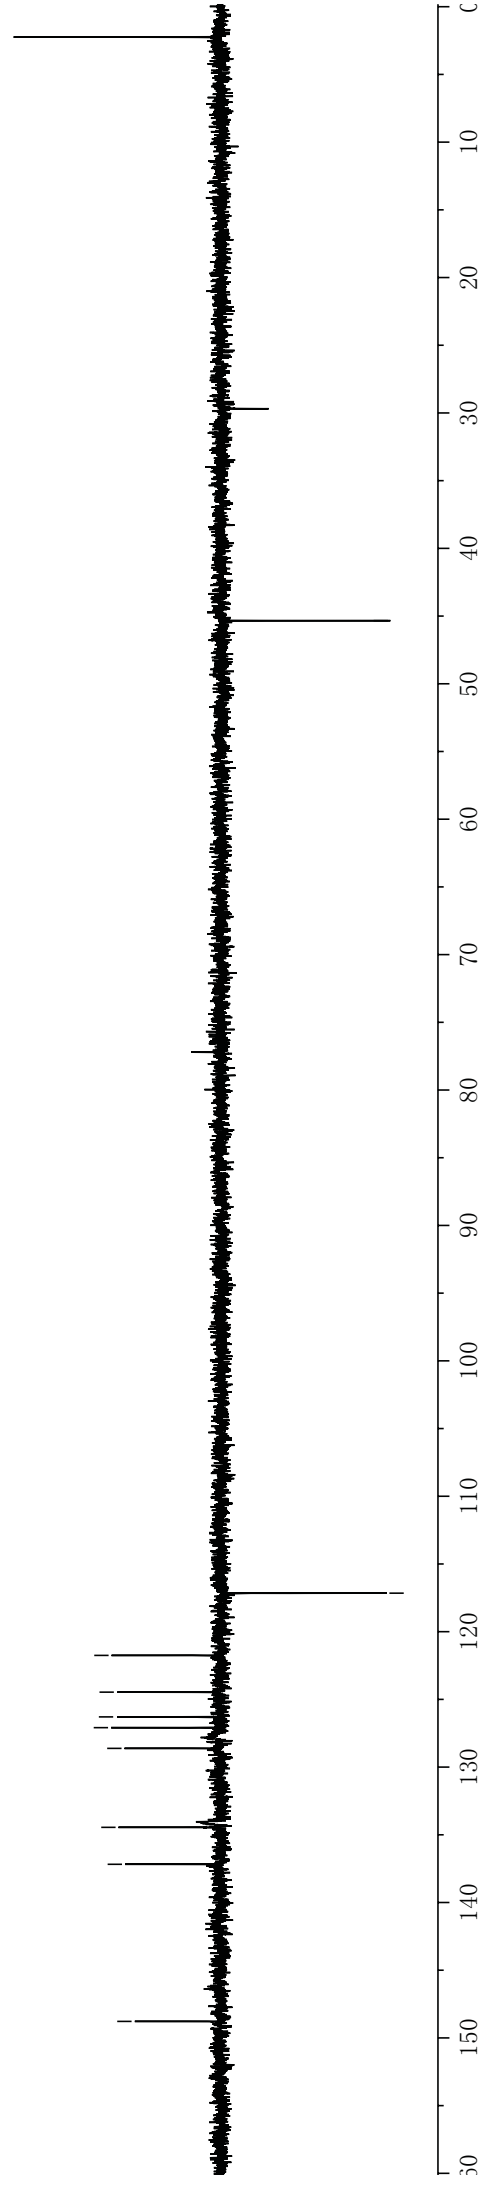

Lin-7-103-2A H1  
CDCI3 400MHZ

8.470  
8.400  
7.573  
7.557  
7.542  
7.192  
7.174  
7.150  
7.131  
7.073  
7.054  
6.534

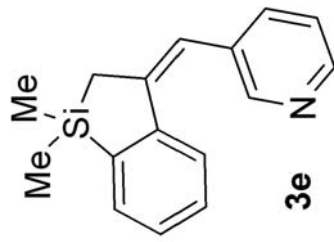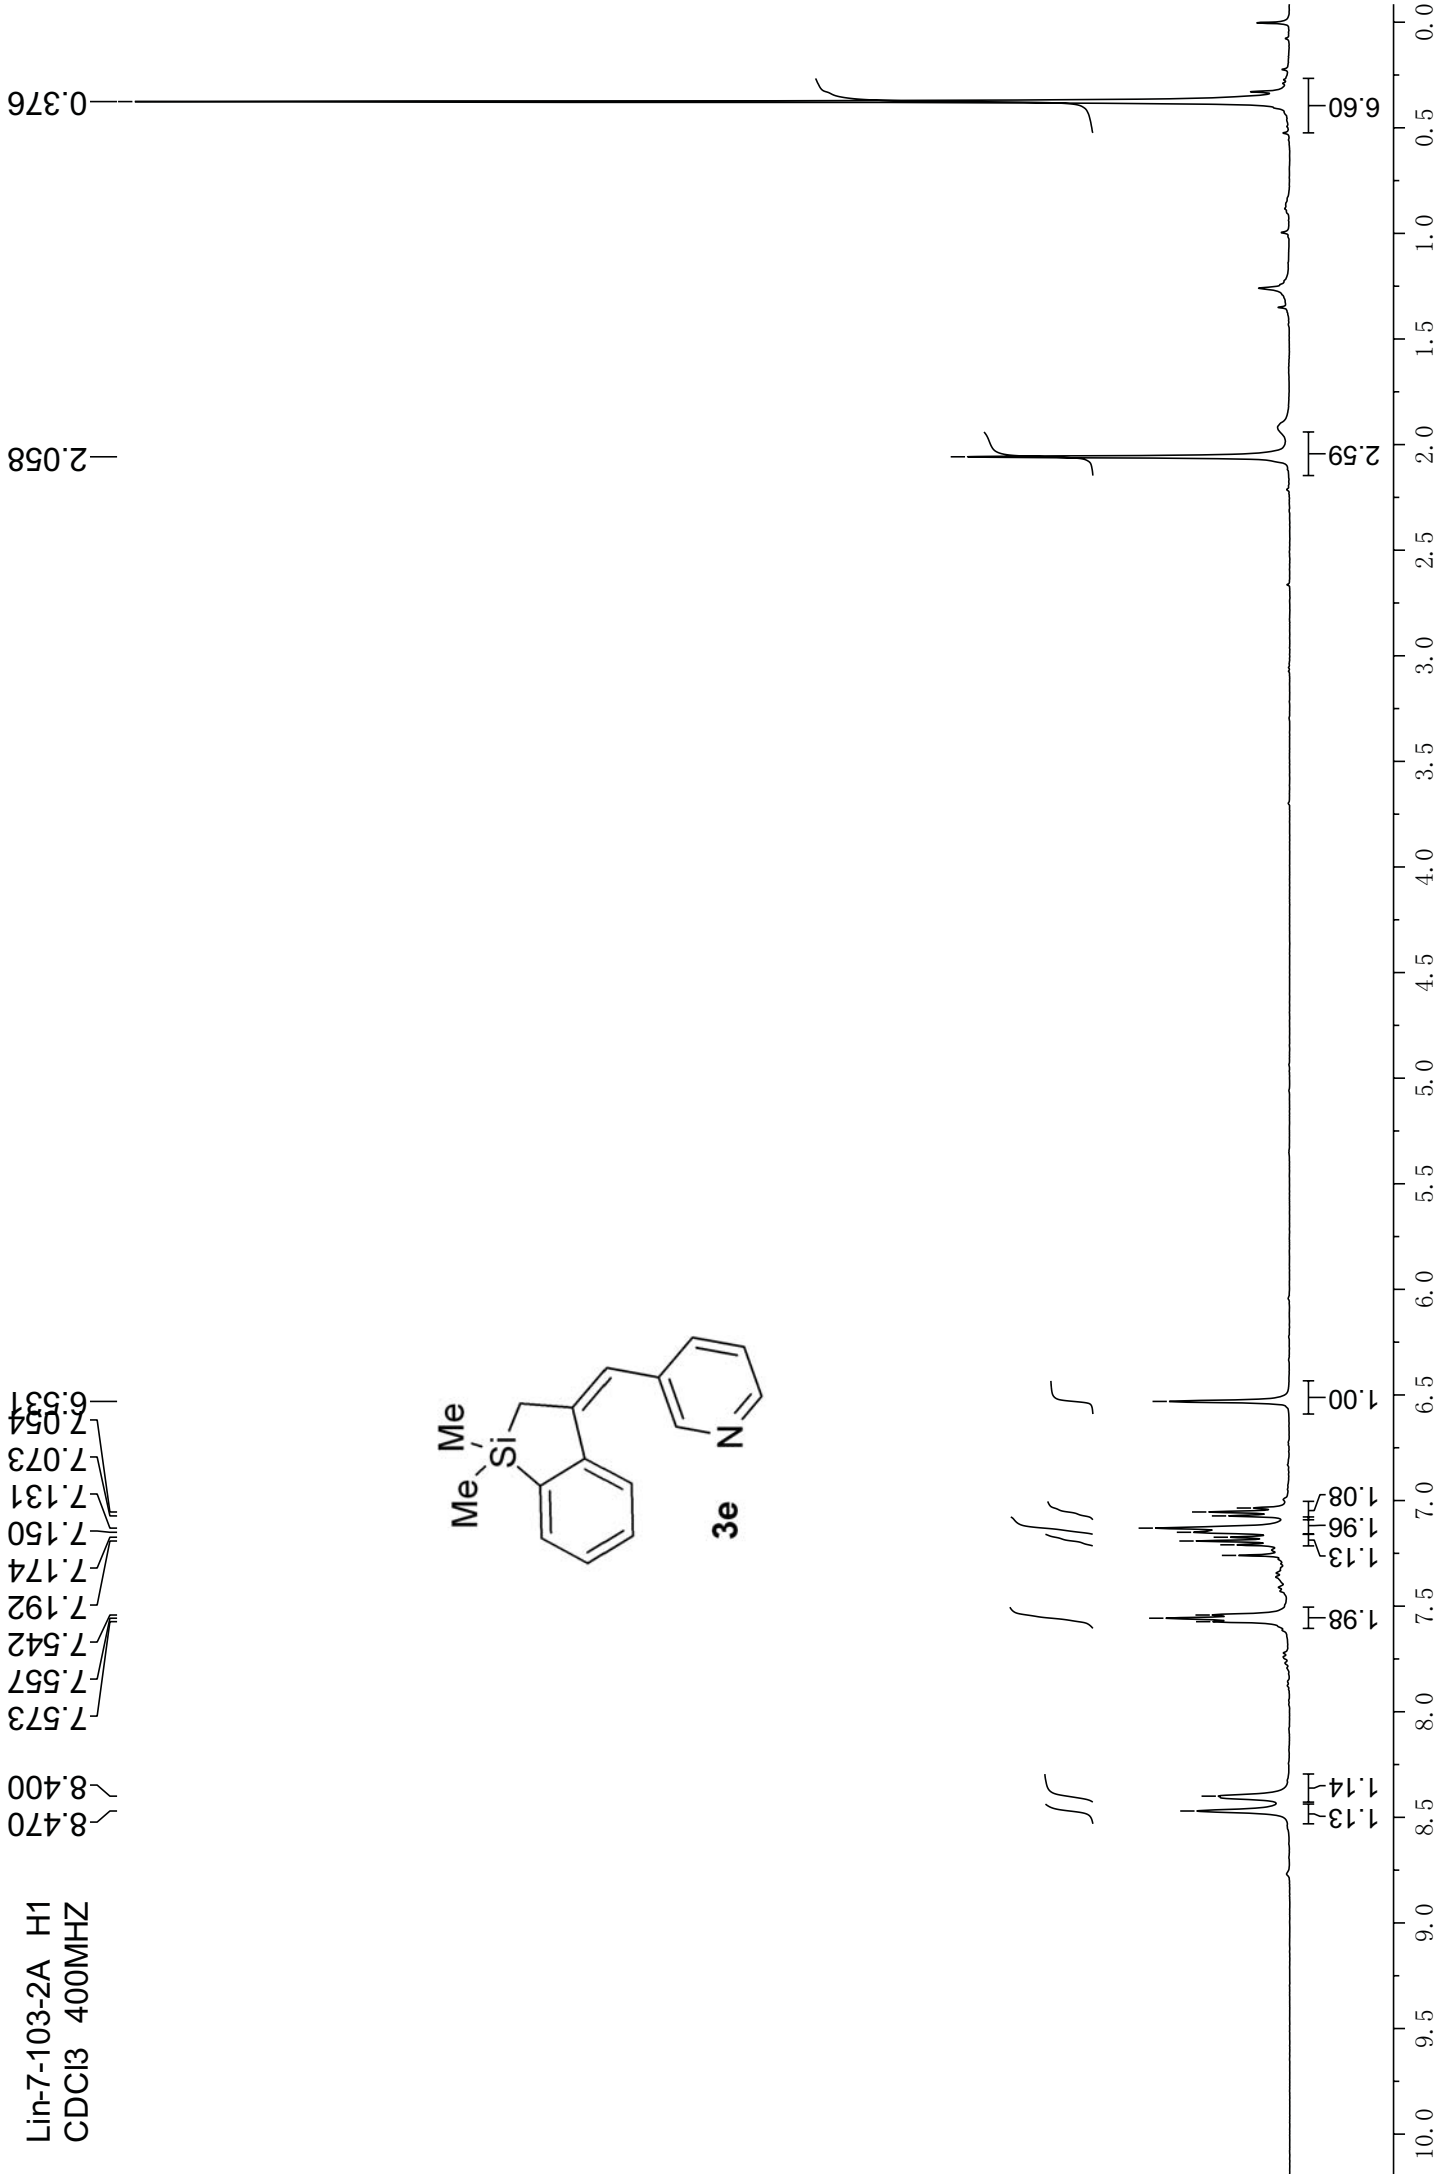

Lin-7-103-2A C13  
CDCI3 100MHZ

149.928  
147.516  
147.245  
144.556  
144.204  
135.776  
134.587  
132.351  
128.546  
127.536  
126.268  
122.991  
119.542

77.318  
77.000  
76.683

28.435

2.764

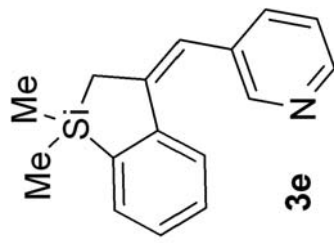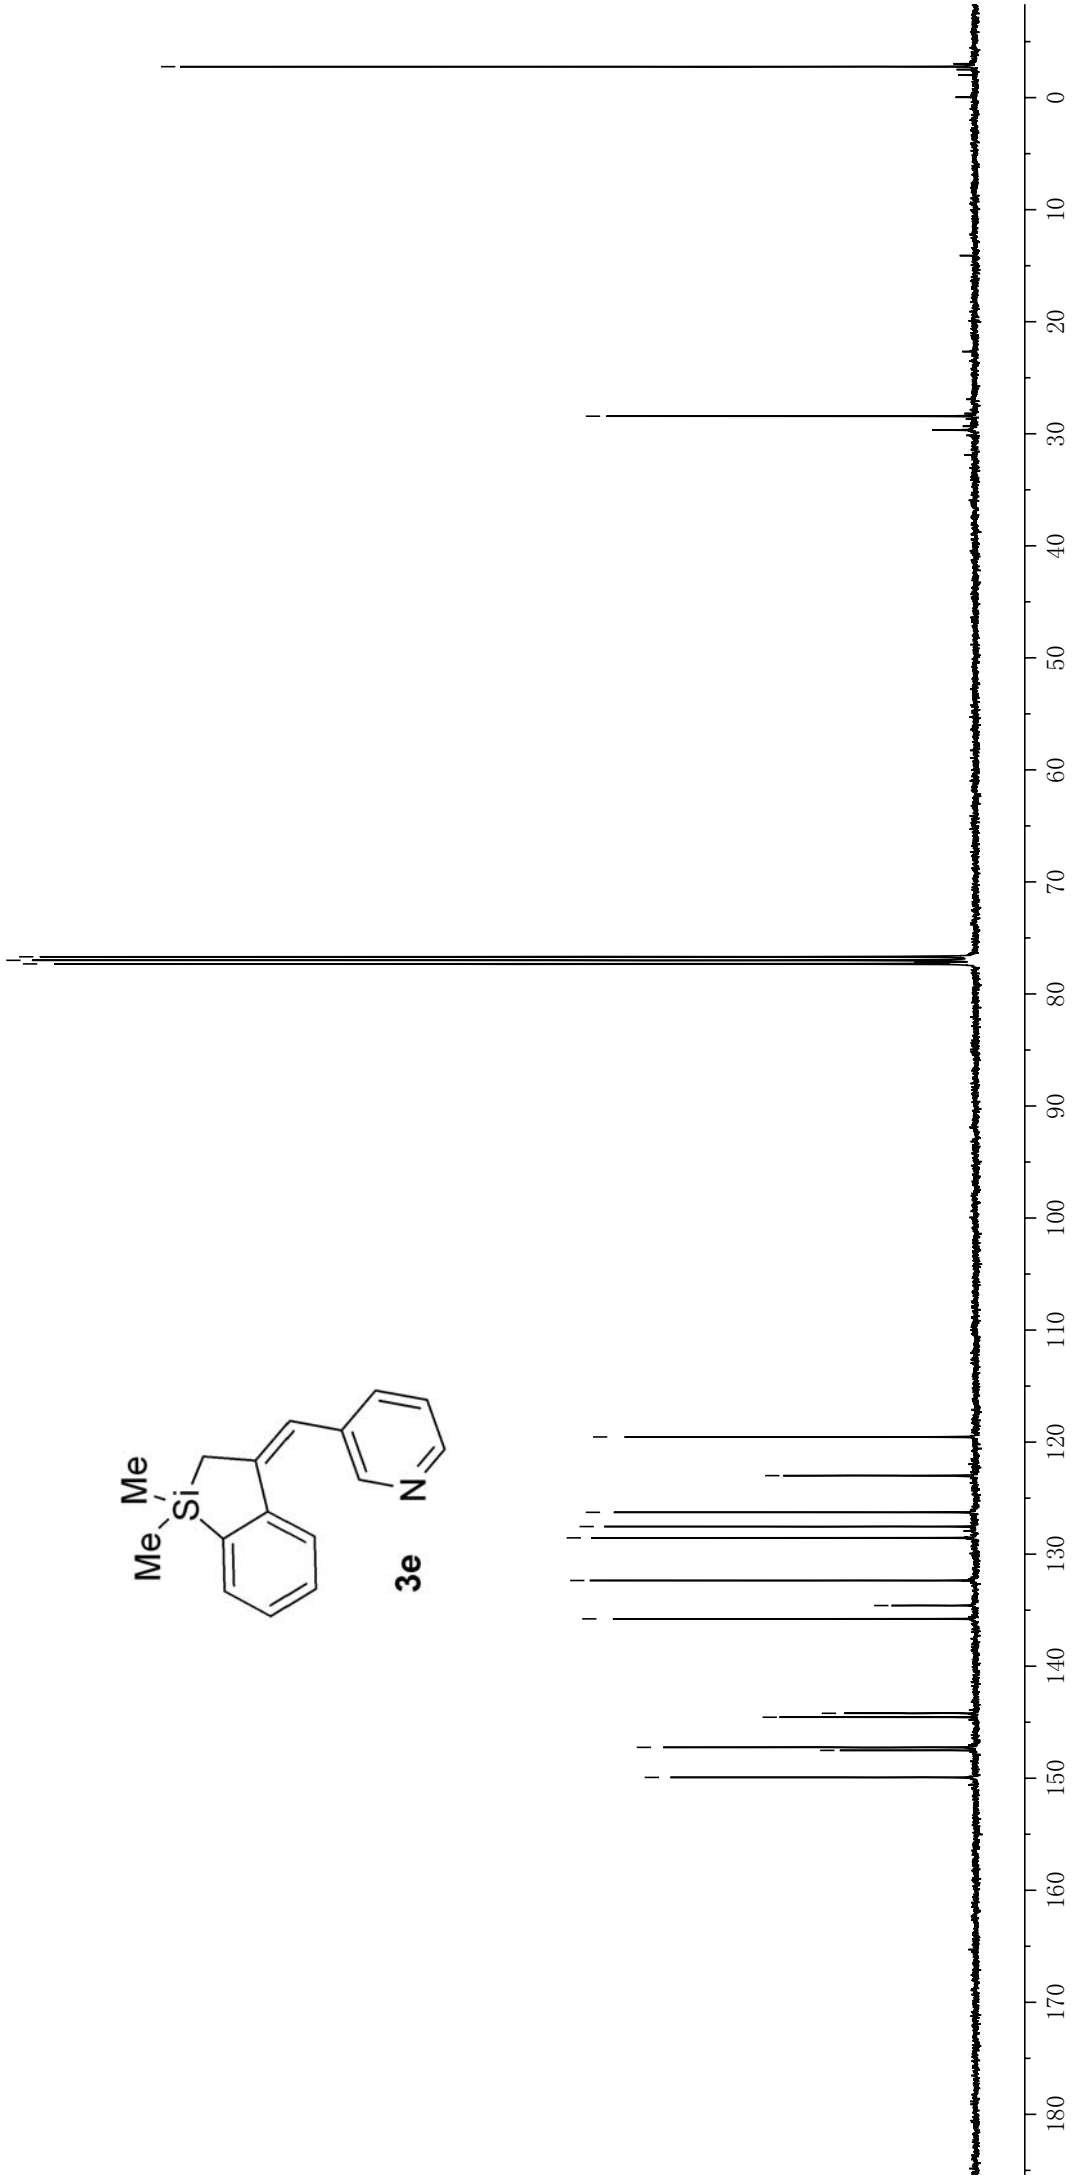

LIn-7-84-2 H1  
CDCI3 400MHZ

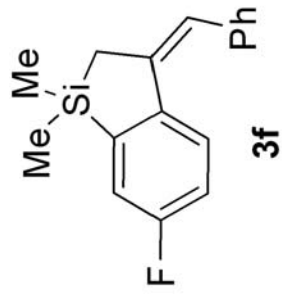

7.261  
7.247  
7.197  
7.183  
7.171  
7.161  
7.148  
6.742  
6.737  
6.720  
6.715  
6.699  
6.693  
6.617

2.054

0.383

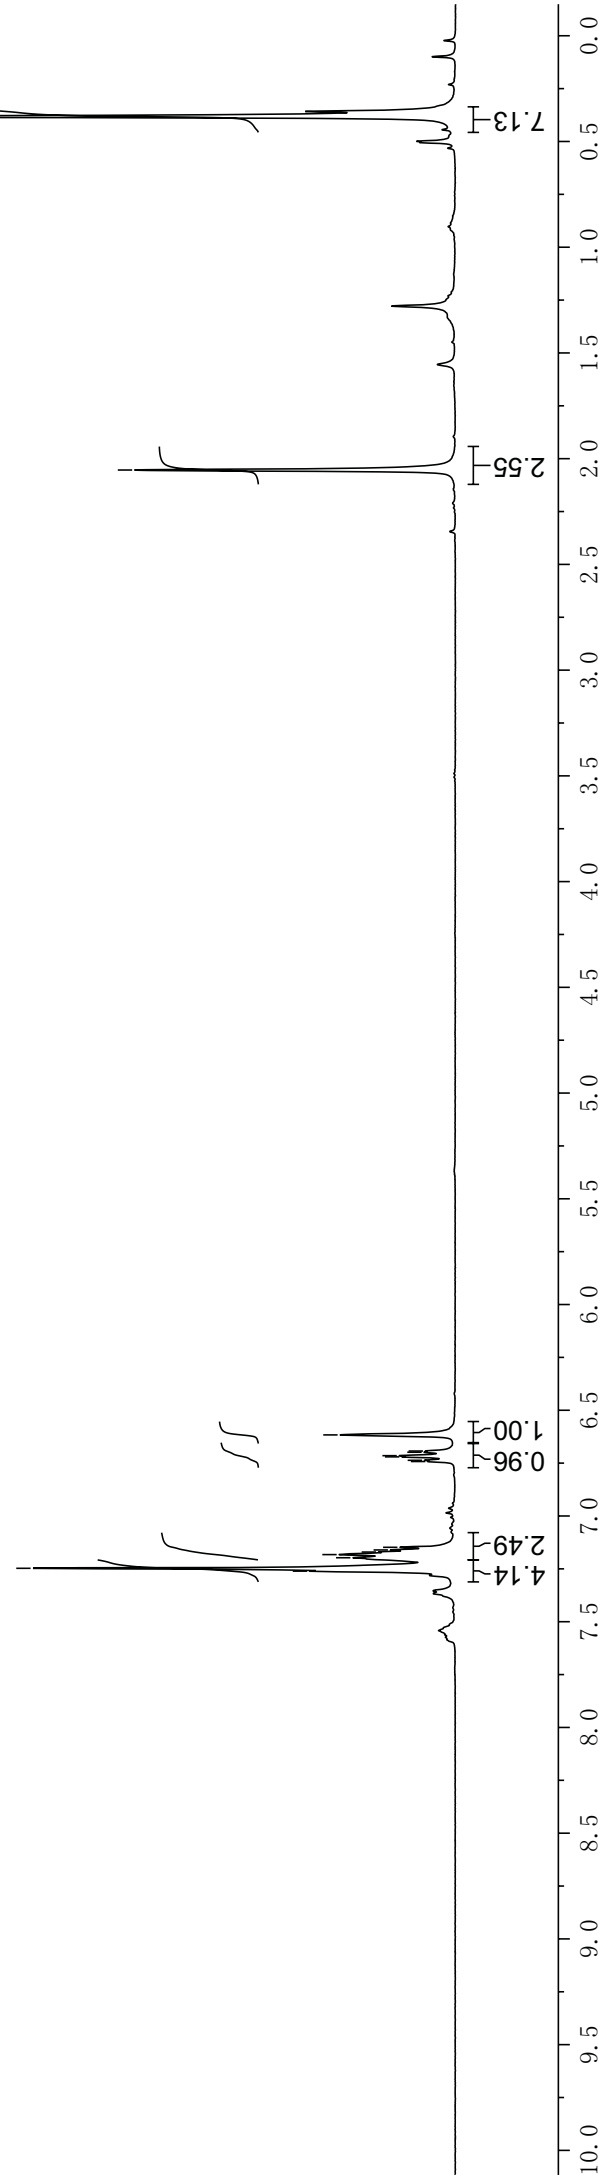

LIn-7-84-2 C13  
CDCI3 100MHZ

163.130  
160.646  
146.969  
146.921  
143.943  
143.916  
140.471  
138.685  
128.588  
128.318  
128.296  
128.246  
126.319  
123.607  
123.594  
117.846  
117.660  
115.707  
115.485

77.316  
77.000  
76.682

28.028

2.833

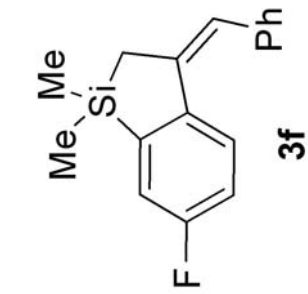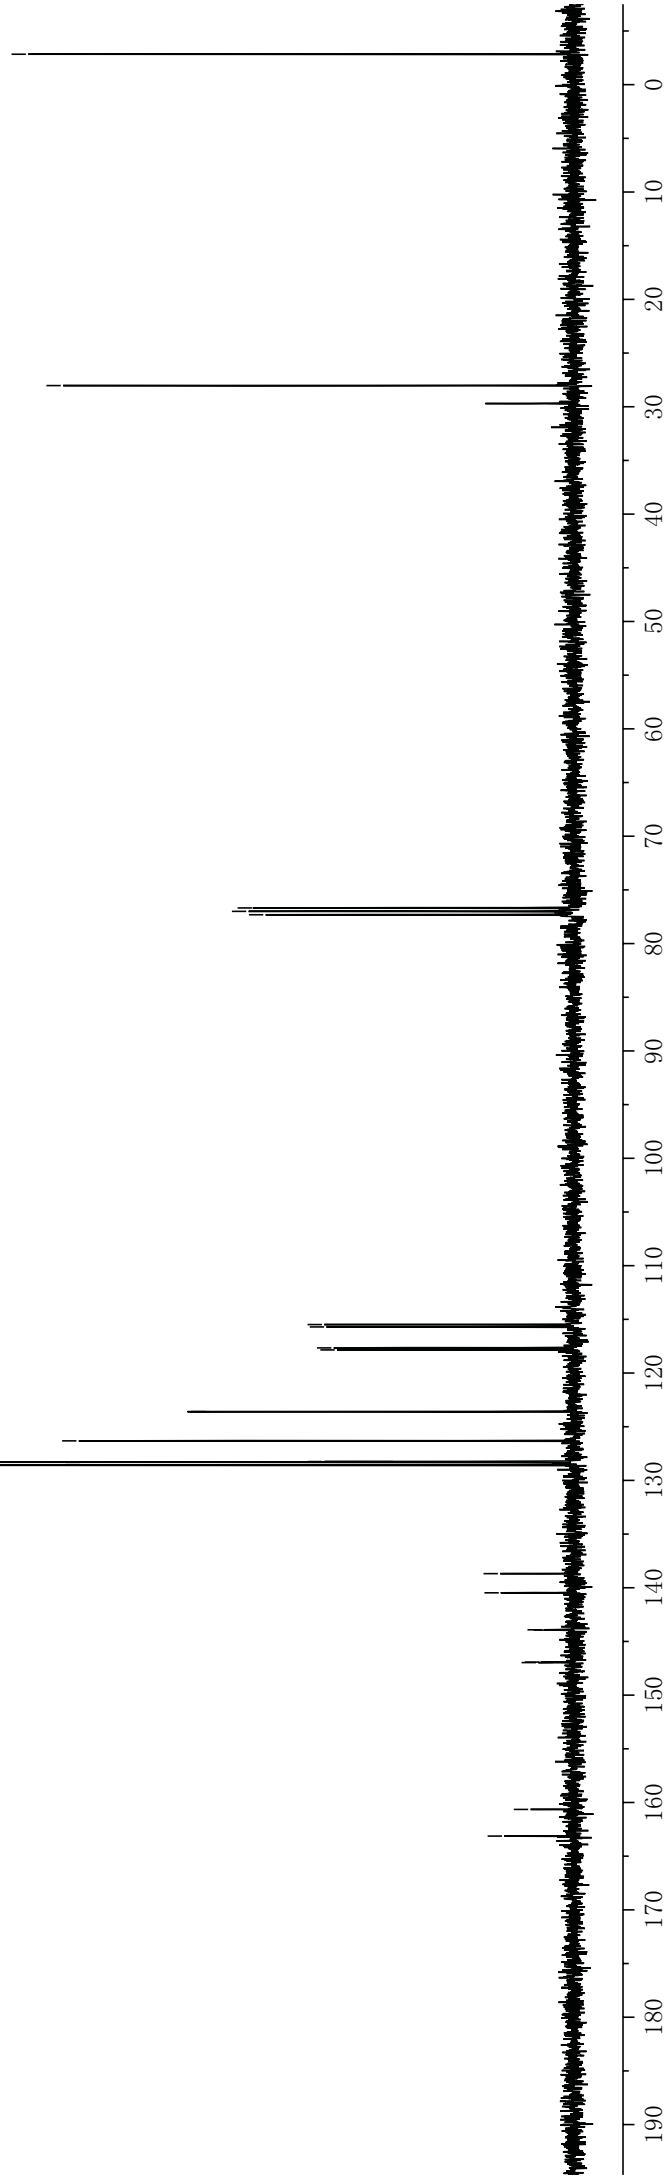



Lin-7-84-3 H1  
CDCI3 400MHZ

7.434  
7.414  
7.270  
7.261  
7.256  
6.699  
6.694  
6.661

3.391

2.027  
2.023

1.259

0.340

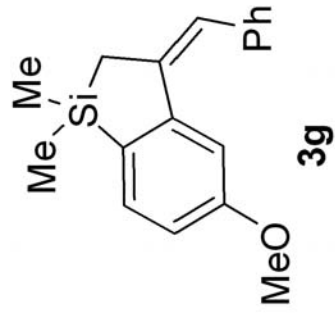

0.94  
3.88  
1.09  
0.90  
0.86  
1.00

3.57

2.63

6.90

10.0 9.5 9.0 8.5 8.0 7.5 7.0 6.5 6.0 5.5 5.0 4.5 4.0 3.5 3.0 2.5 2.0 1.5 1.0 0.5 0.0

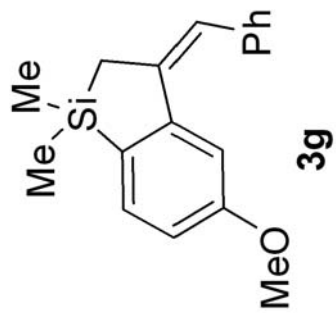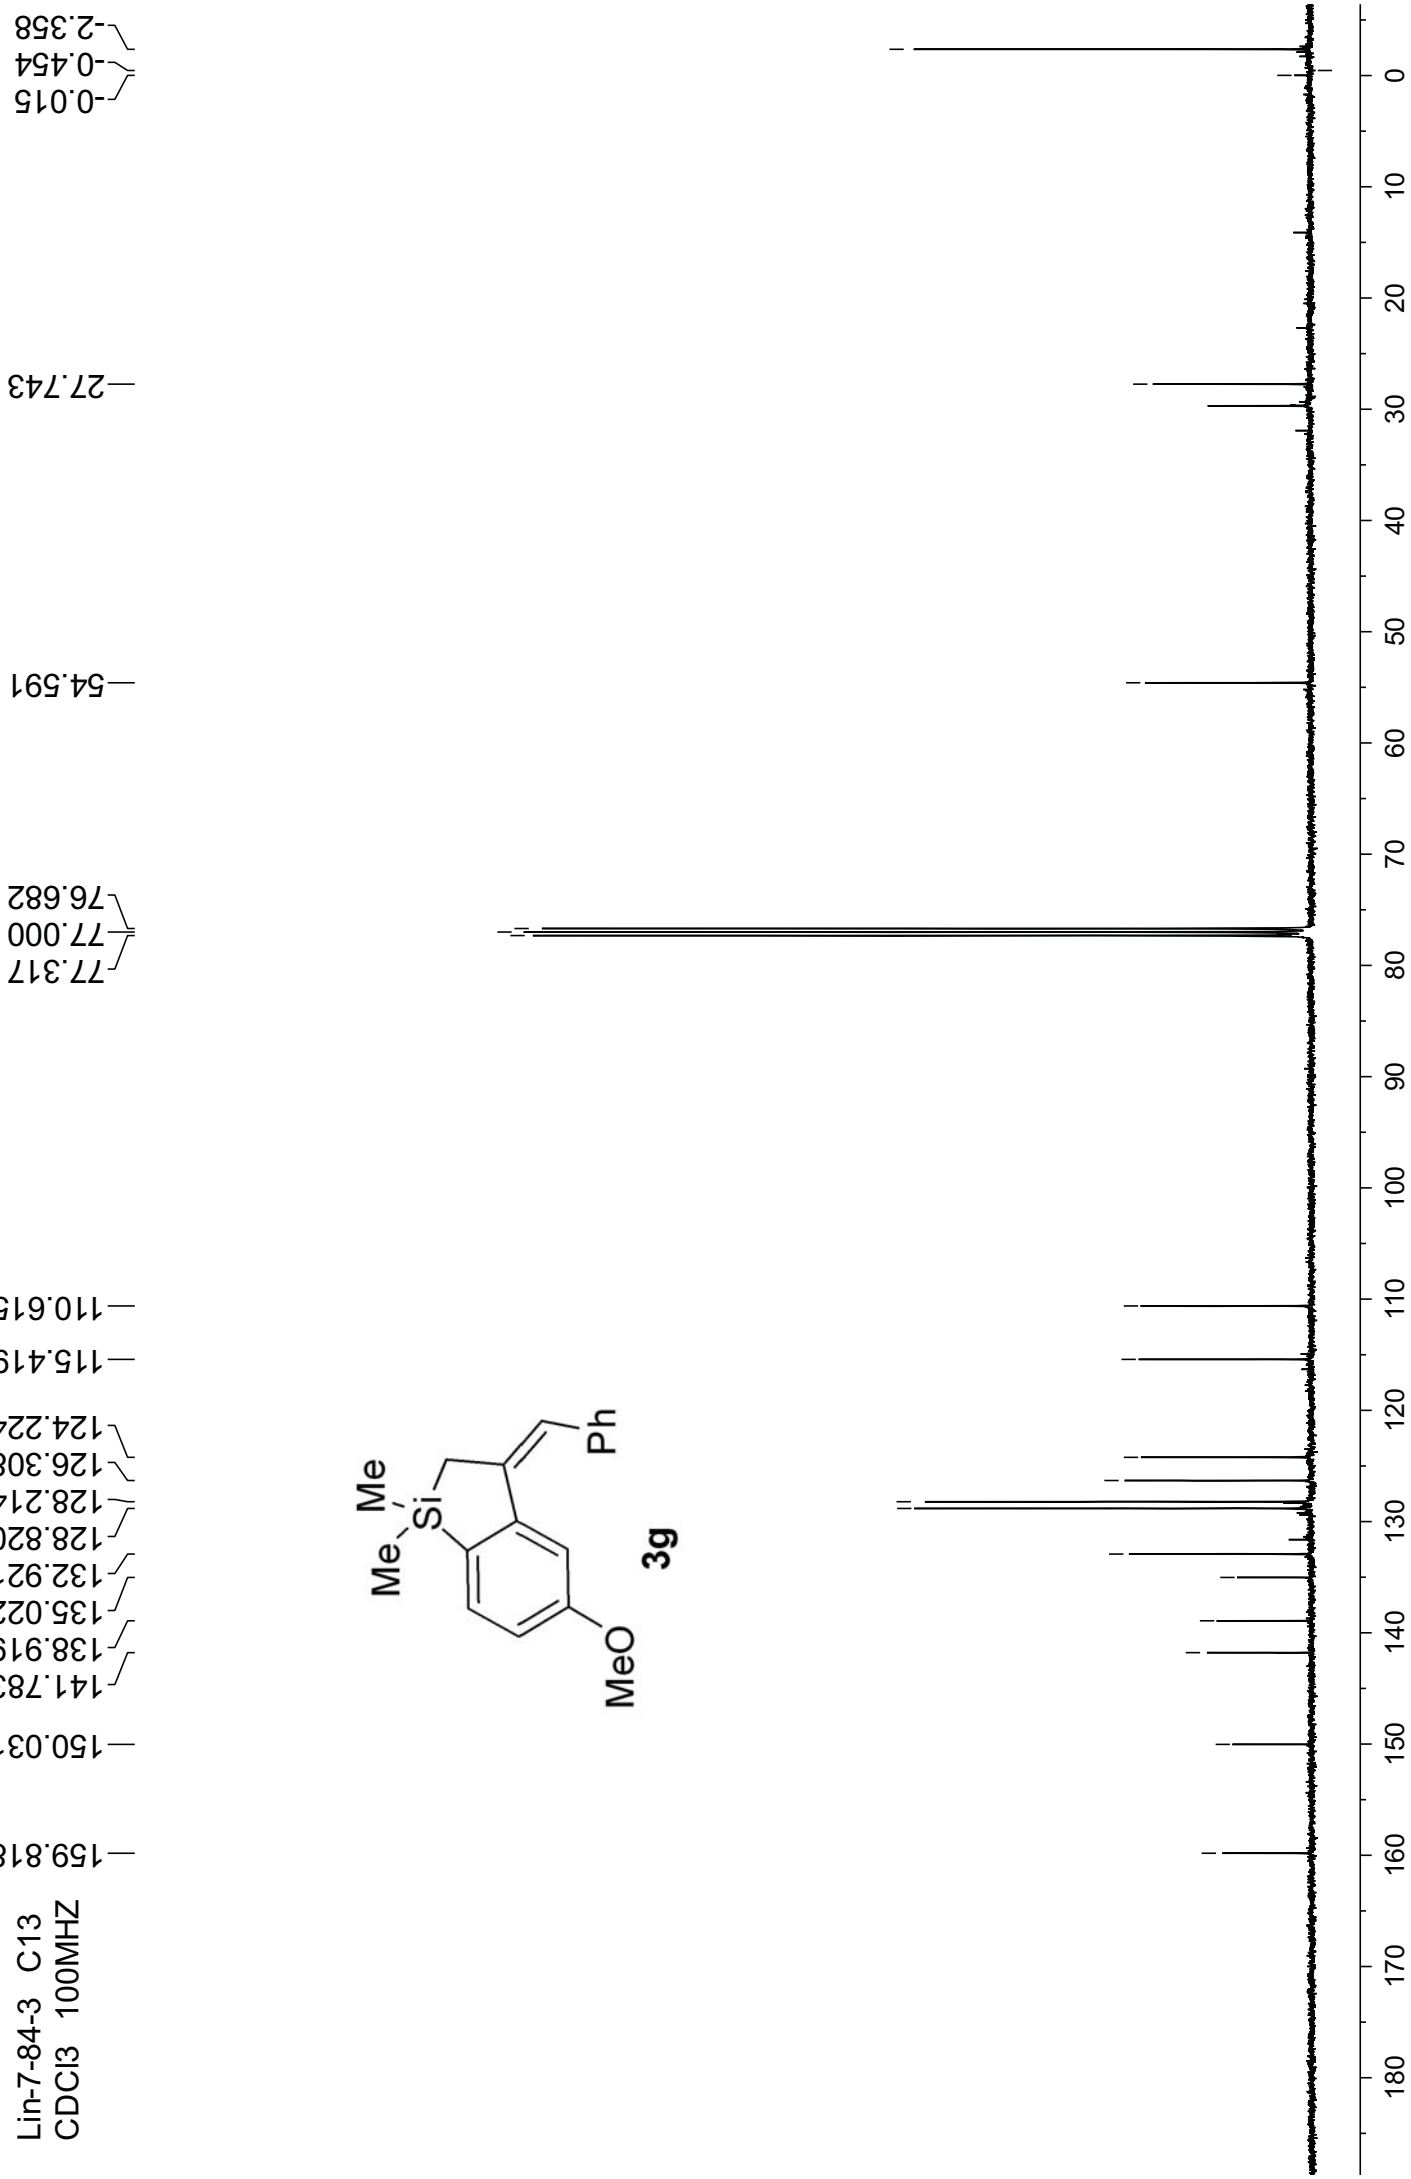

Lin-7-84-1a H1  
CDCI3 400MHZ

7.236  
7.177  
7.165  
6.916  
6.643  
6.533  
5.864

2.007

0.325

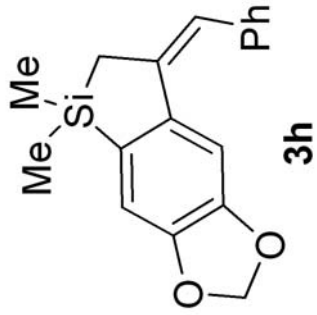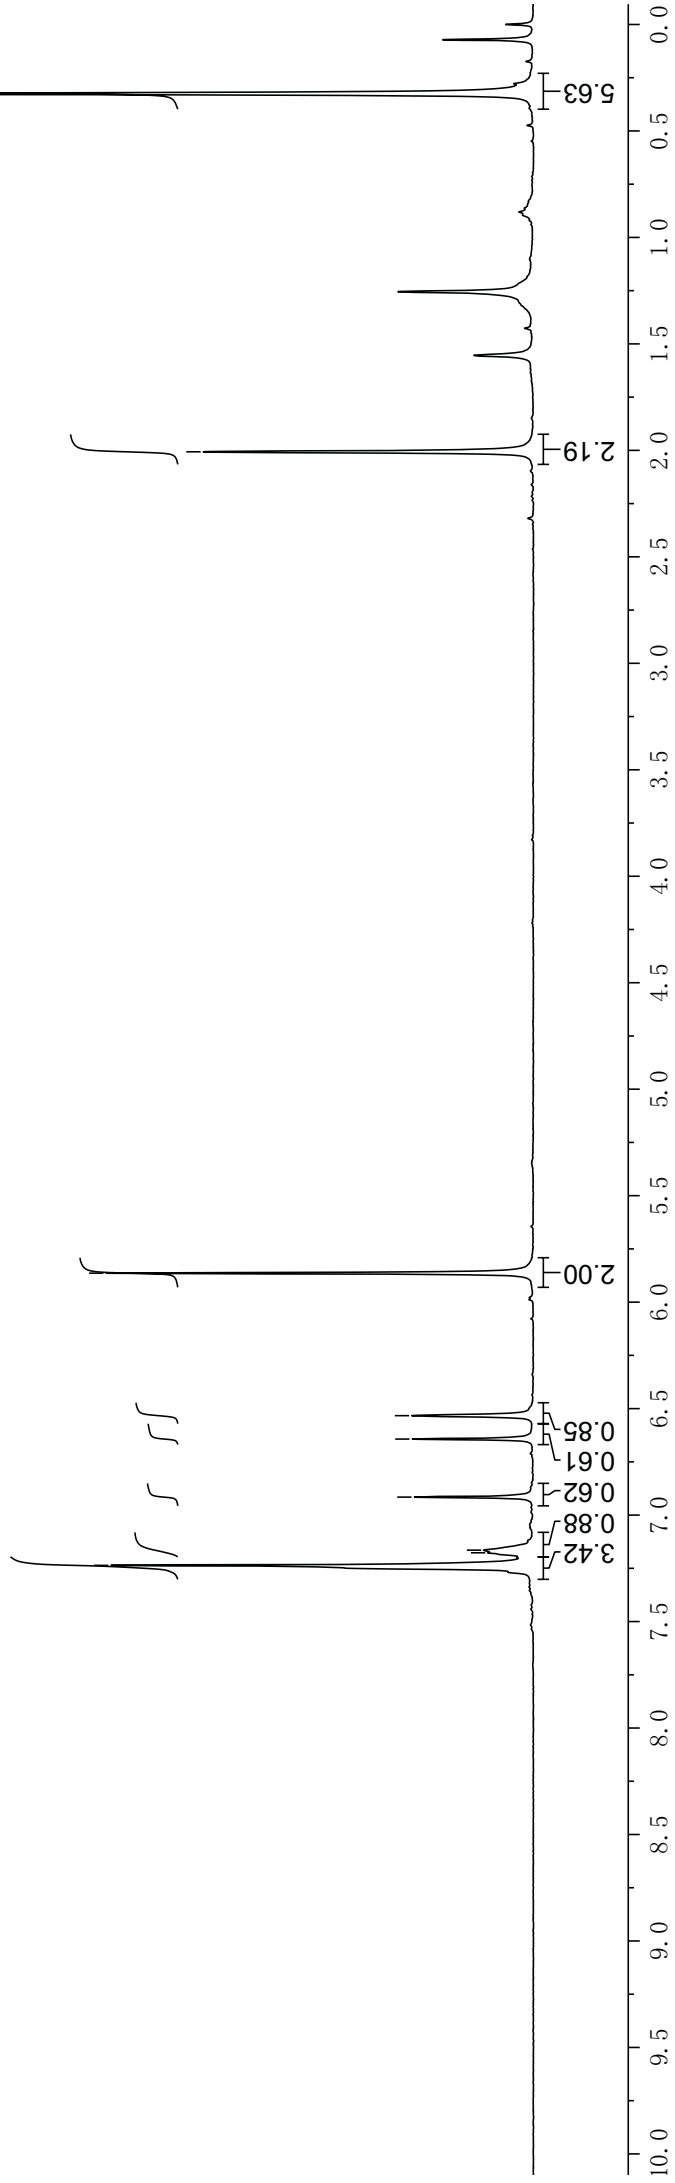

Lin-7-84-1a C13  
CDCI3 100MHZ

148.266  
147.281  
142.977  
141.010  
138.710  
137.724  
128.643  
128.271  
126.210  
122.600  
110.329  
107.410  
100.797

77.317  
77.000  
76.683

28.156

2.501

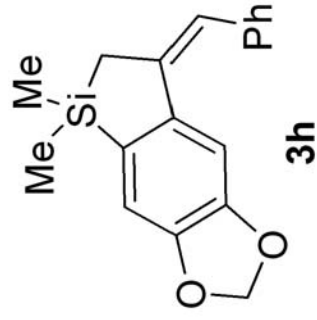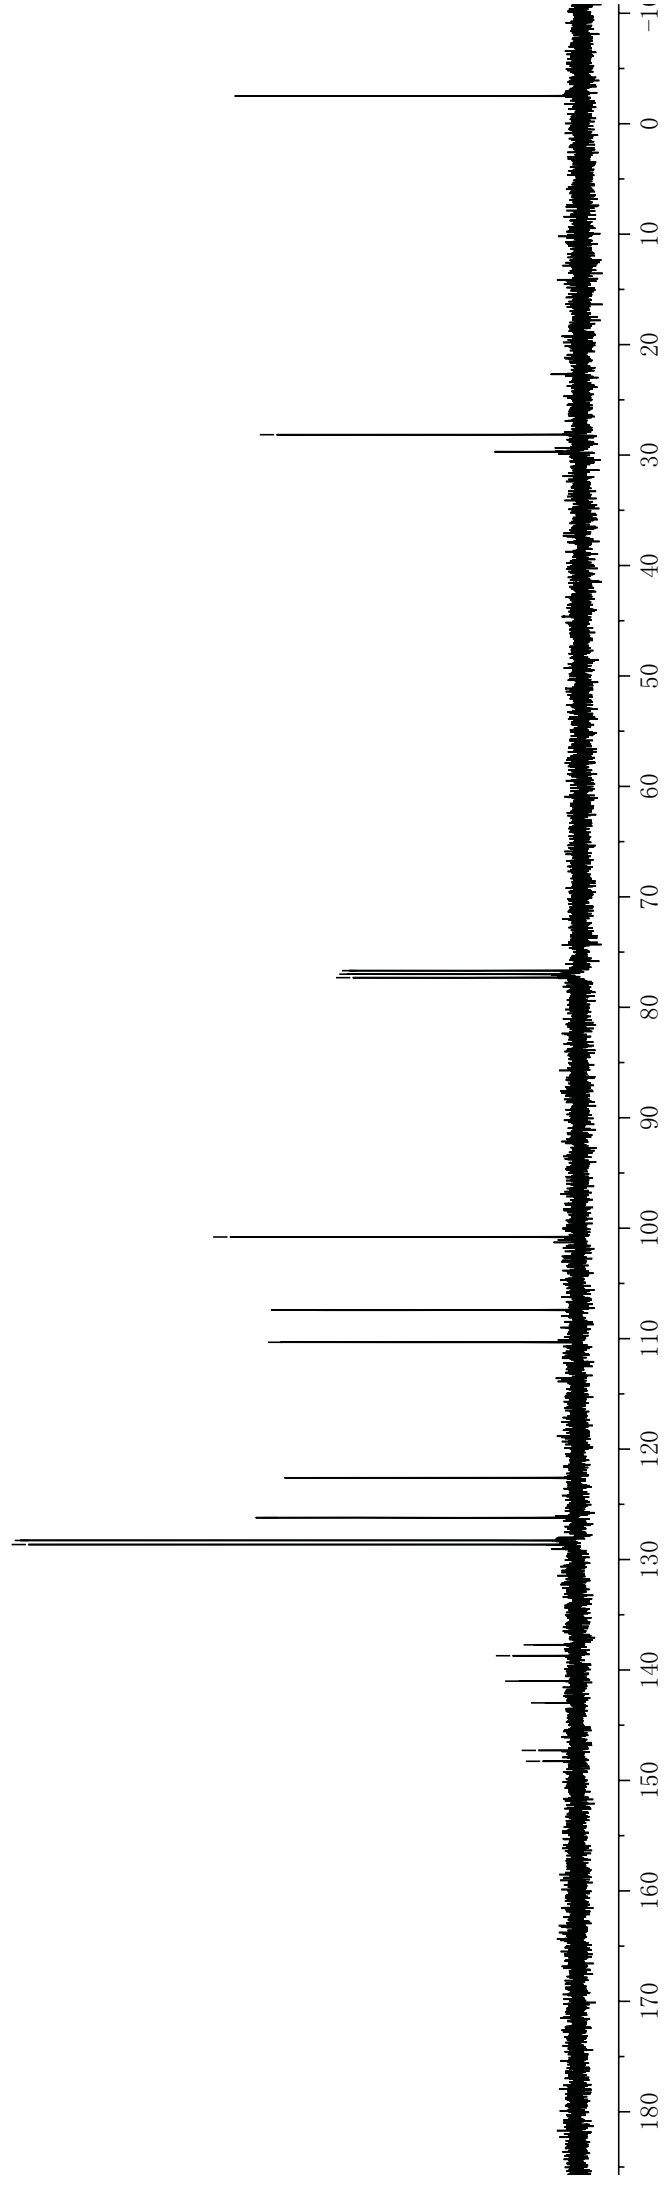

Lin-7-104-4b\_H1  
CDCI3 400MHZ

7.756  
7.737  
7.541  
7.523  
7.495  
7.479  
7.473  
7.425  
7.407  
7.389

5.765  
5.741

2.091  
2.086  
1.960  
1.948  
1.937  
1.916  
1.099  
1.095  
1.079  
1.075  
0.739  
0.727  
0.717  
0.712  
0.553

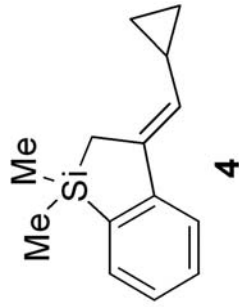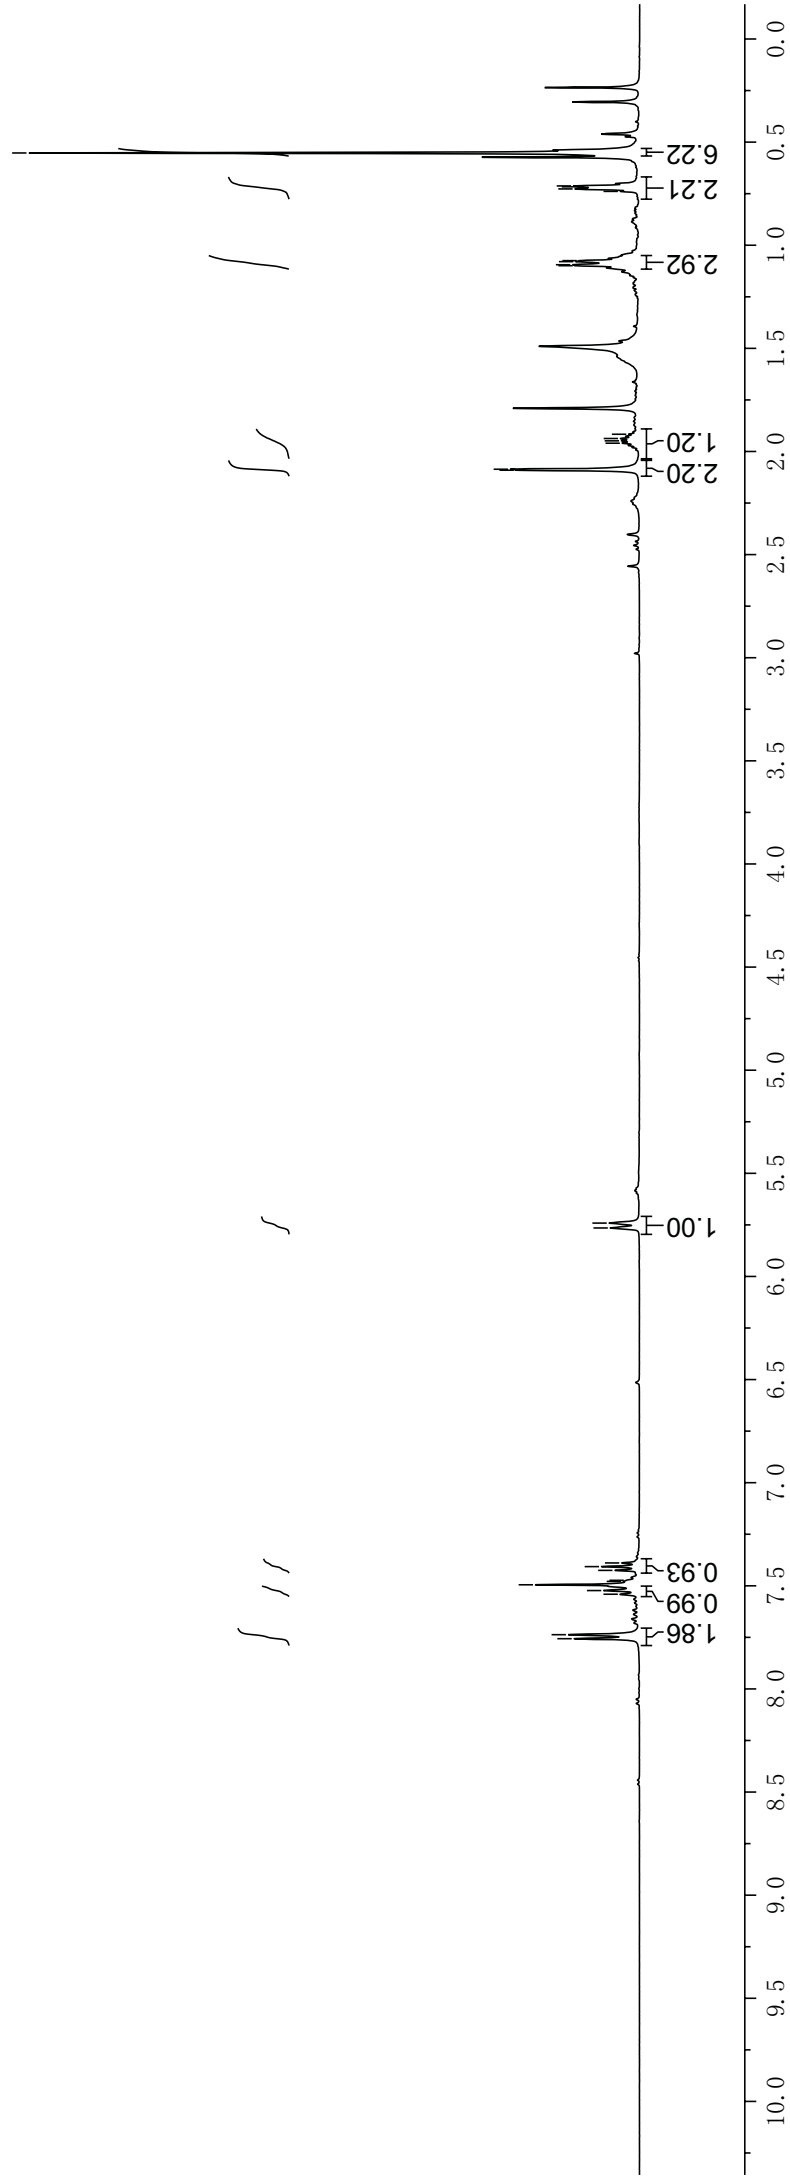

Lin-7-104-4b C13  
CDCI3 100MHZ

150.315  
140.275  
138.131  
132.160  
129.505  
128.610  
126.294  
120.668

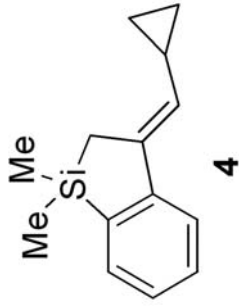

77.317  
77.000  
76.682

16.236  
11.984  
7.351  
-1.641

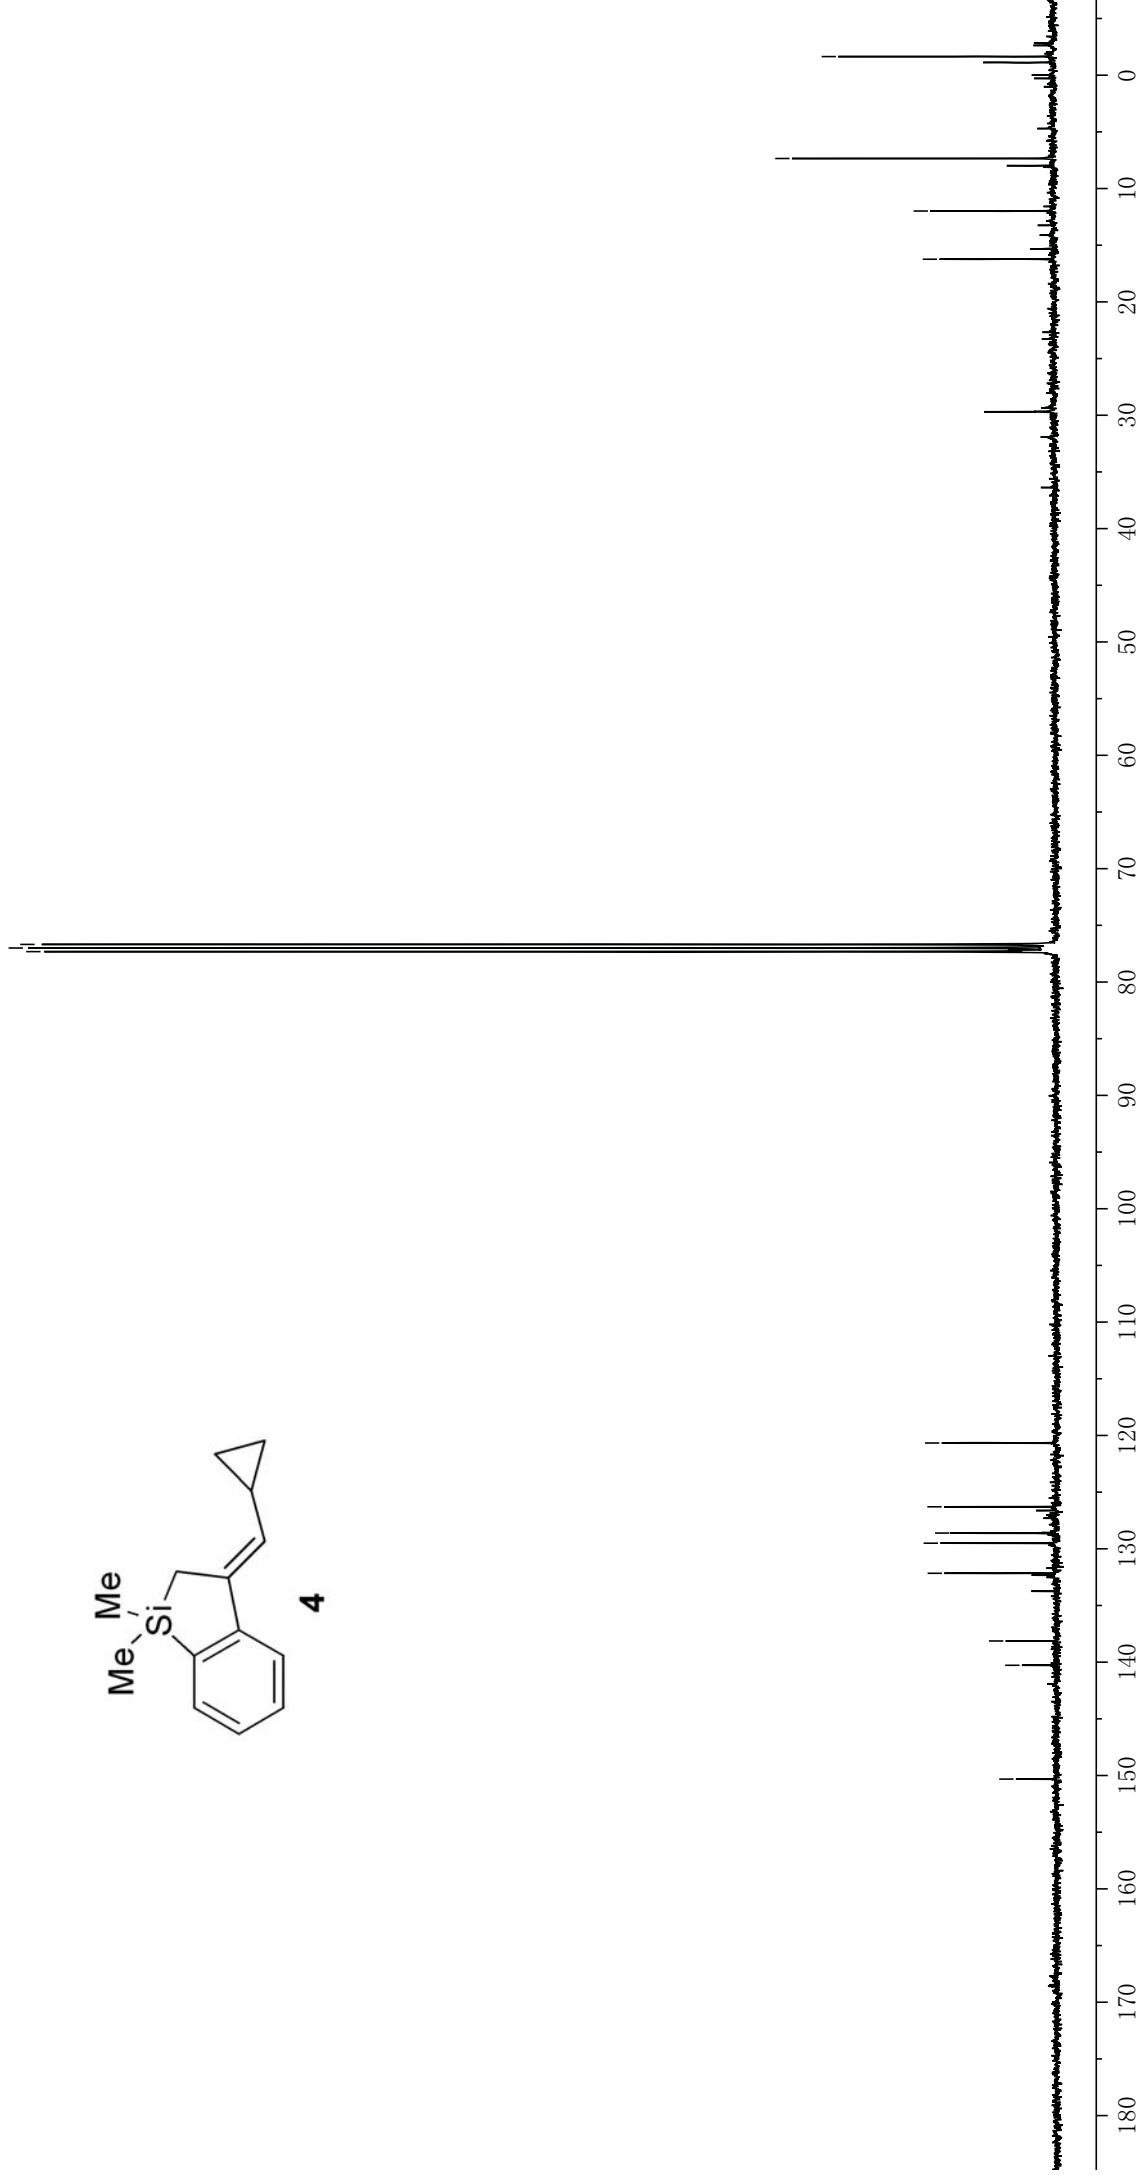

Lin-7-104-4a\_H1  
CDCI3 400MHZ

7.764  
7.746  
7.682  
7.663  
7.574  
7.556  
7.538  
7.495  
7.437  
7.419  
7.401  
5.794  
5.788  
5.780  
5.772  
5.765  
5.756  
2.381  
2.364  
2.347  
2.102  
2.093  
2.085  
1.314  
1.296  
1.277  
0.569  
0.560  
0.235

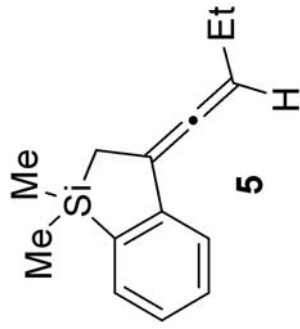

///

0.65  
0.61  
0.79  
0.80

0.45

2.00  
2.40

3.10

6.52

10.0 9.5 9.0 8.5 8.0 7.5 7.0 6.5 6.0 5.5 5.0 4.5 4.0 3.5 3.0 2.5 2.0 1.5 1.0 0.5

Lin-7-104-4a NOEDS 5.54  
 CDCI3 400MHZ

7.744  
 7.743  
 7.680  
 7.660  
 7.573  
 7.554  
 7.495  
 7.423  
 7.416

2.381  
 2.363  
 2.346  
 2.105  
 2.101  
 2.097  
 2.093  
 2.085  
 1.318  
 1.314  
 1.299  
 1.295  
 1.277  
 1.271  
 0.601  
 0.597  
 0.572  
 0.568  
 0.563  
 0.559  
 0.538

5.781

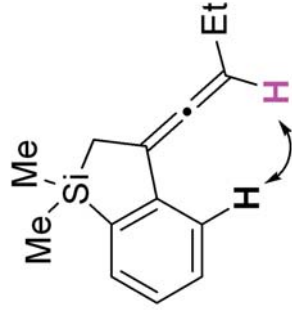

NOE of 5

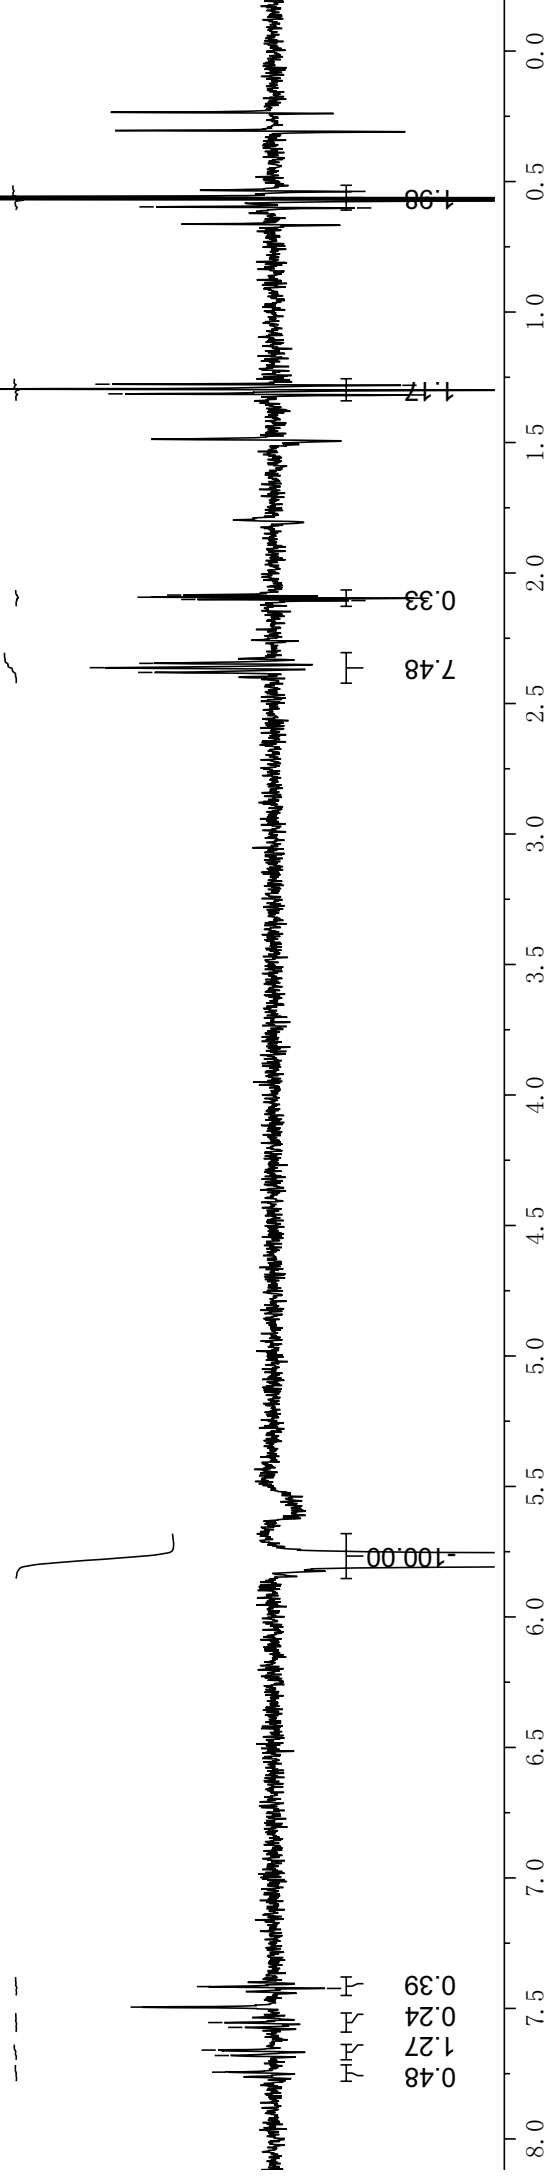



Lin-7-104-4a C13  
CDCI3 100MHZ

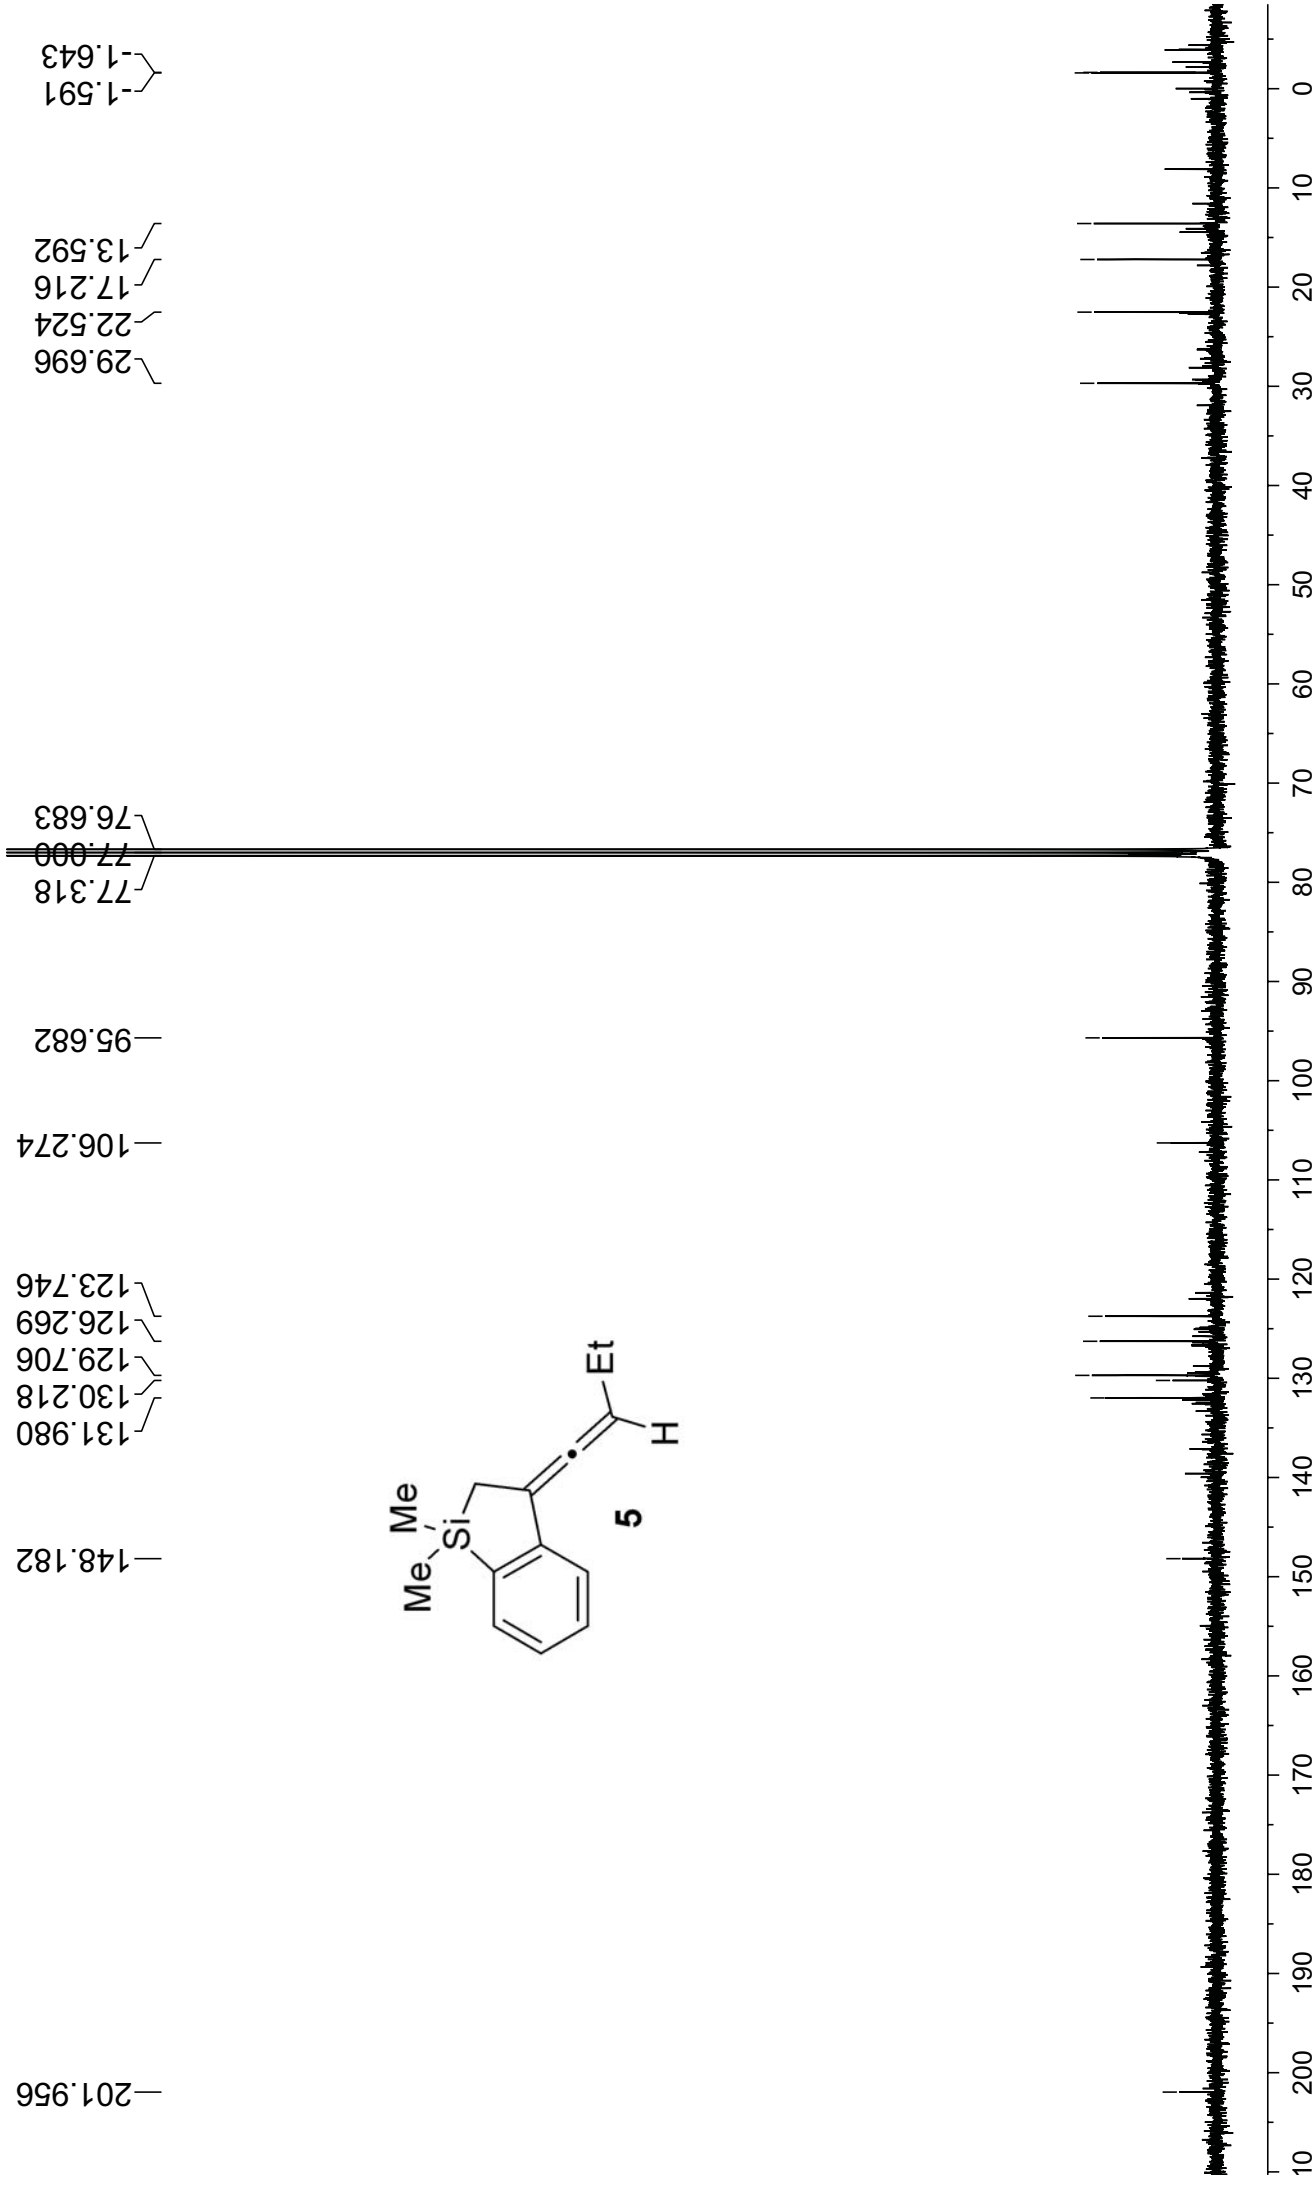

Lin-7-114-1a H1  
CDCI3 400MHZ

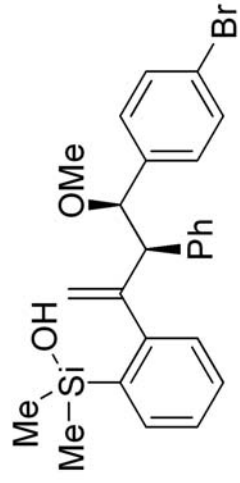

8

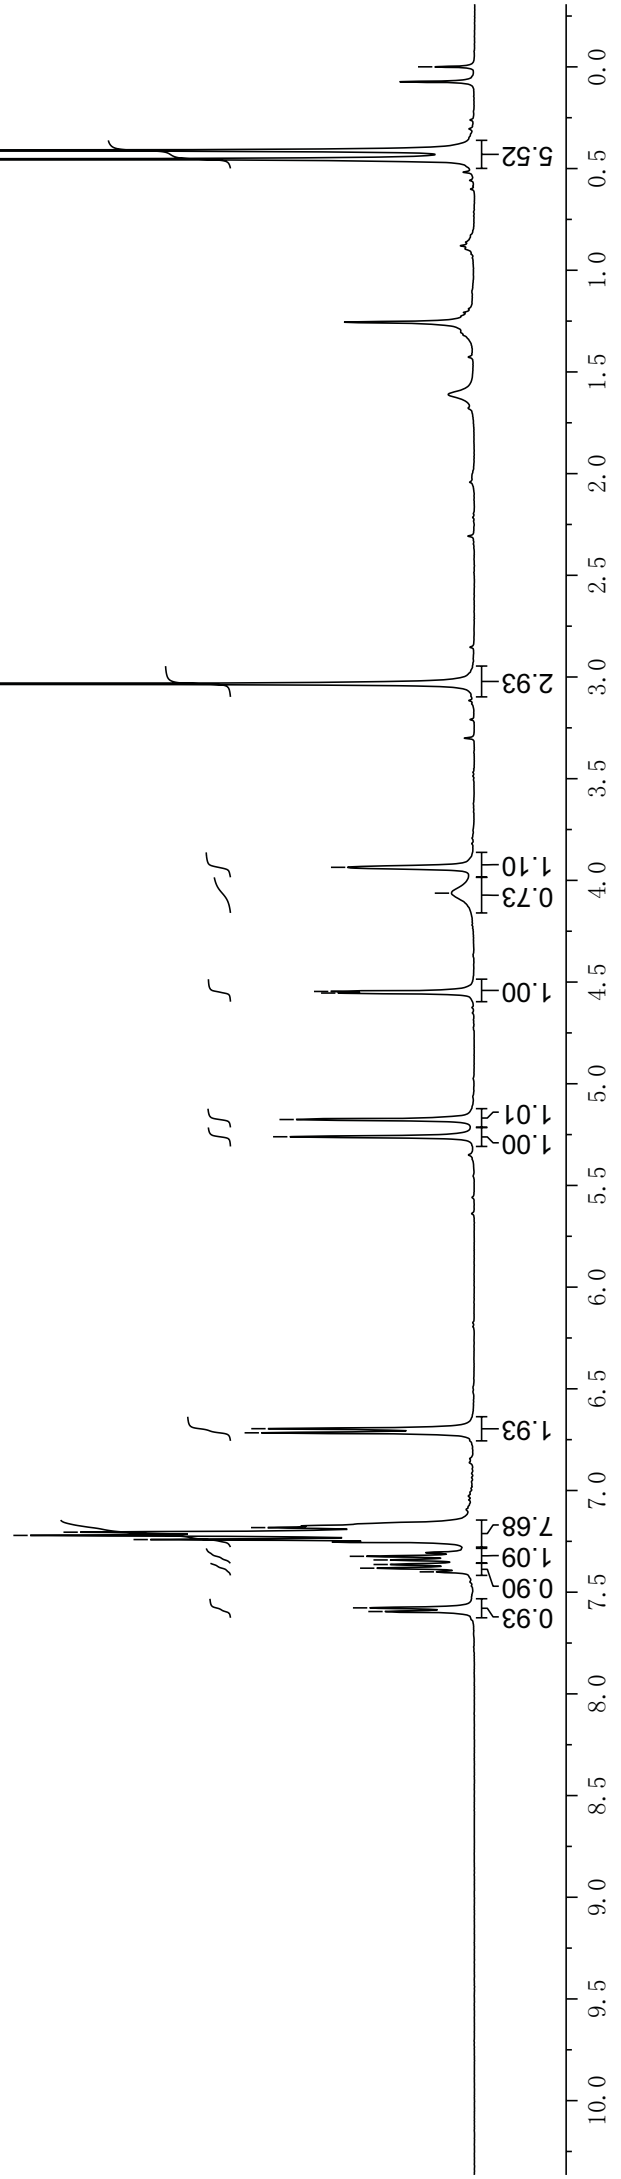

Lin-7-114-1a C13  
CDCI3 100MHZ

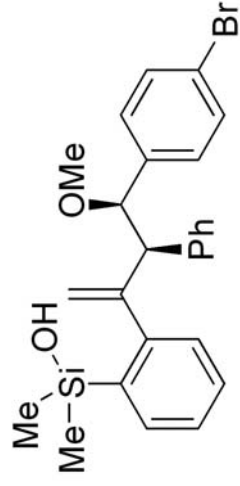

8

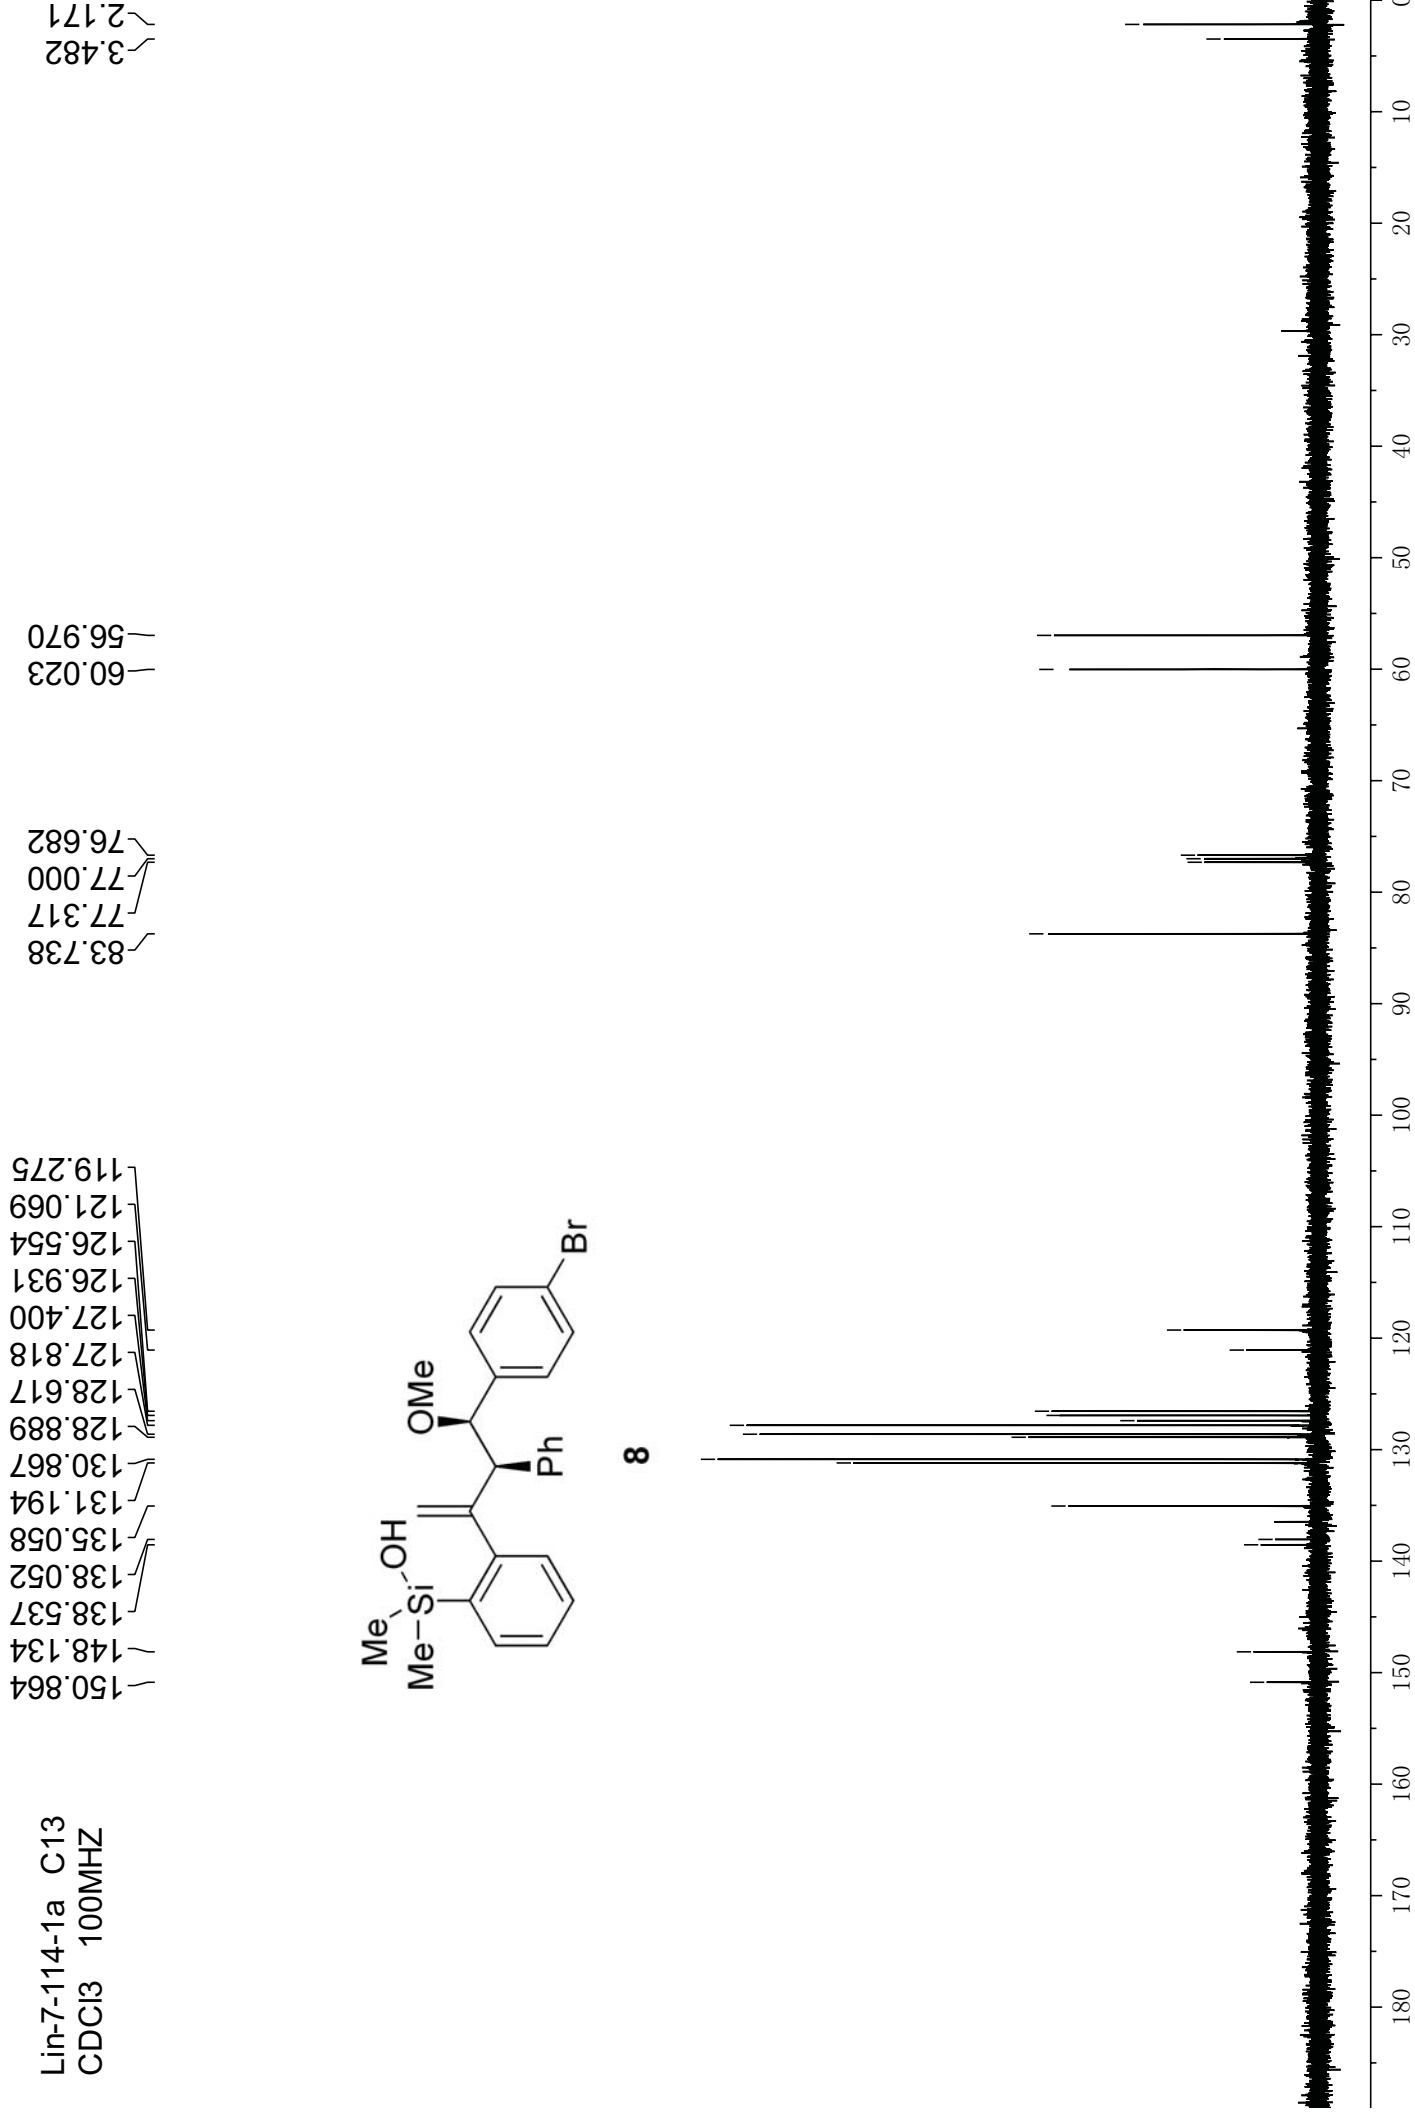

Lin-7-114-1a H1  
CDCI3 400MHZ

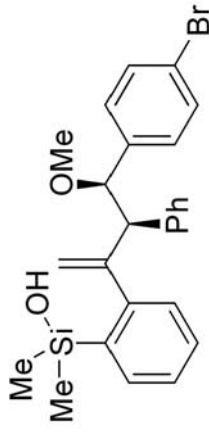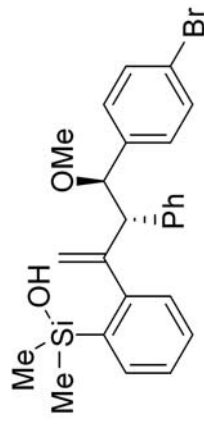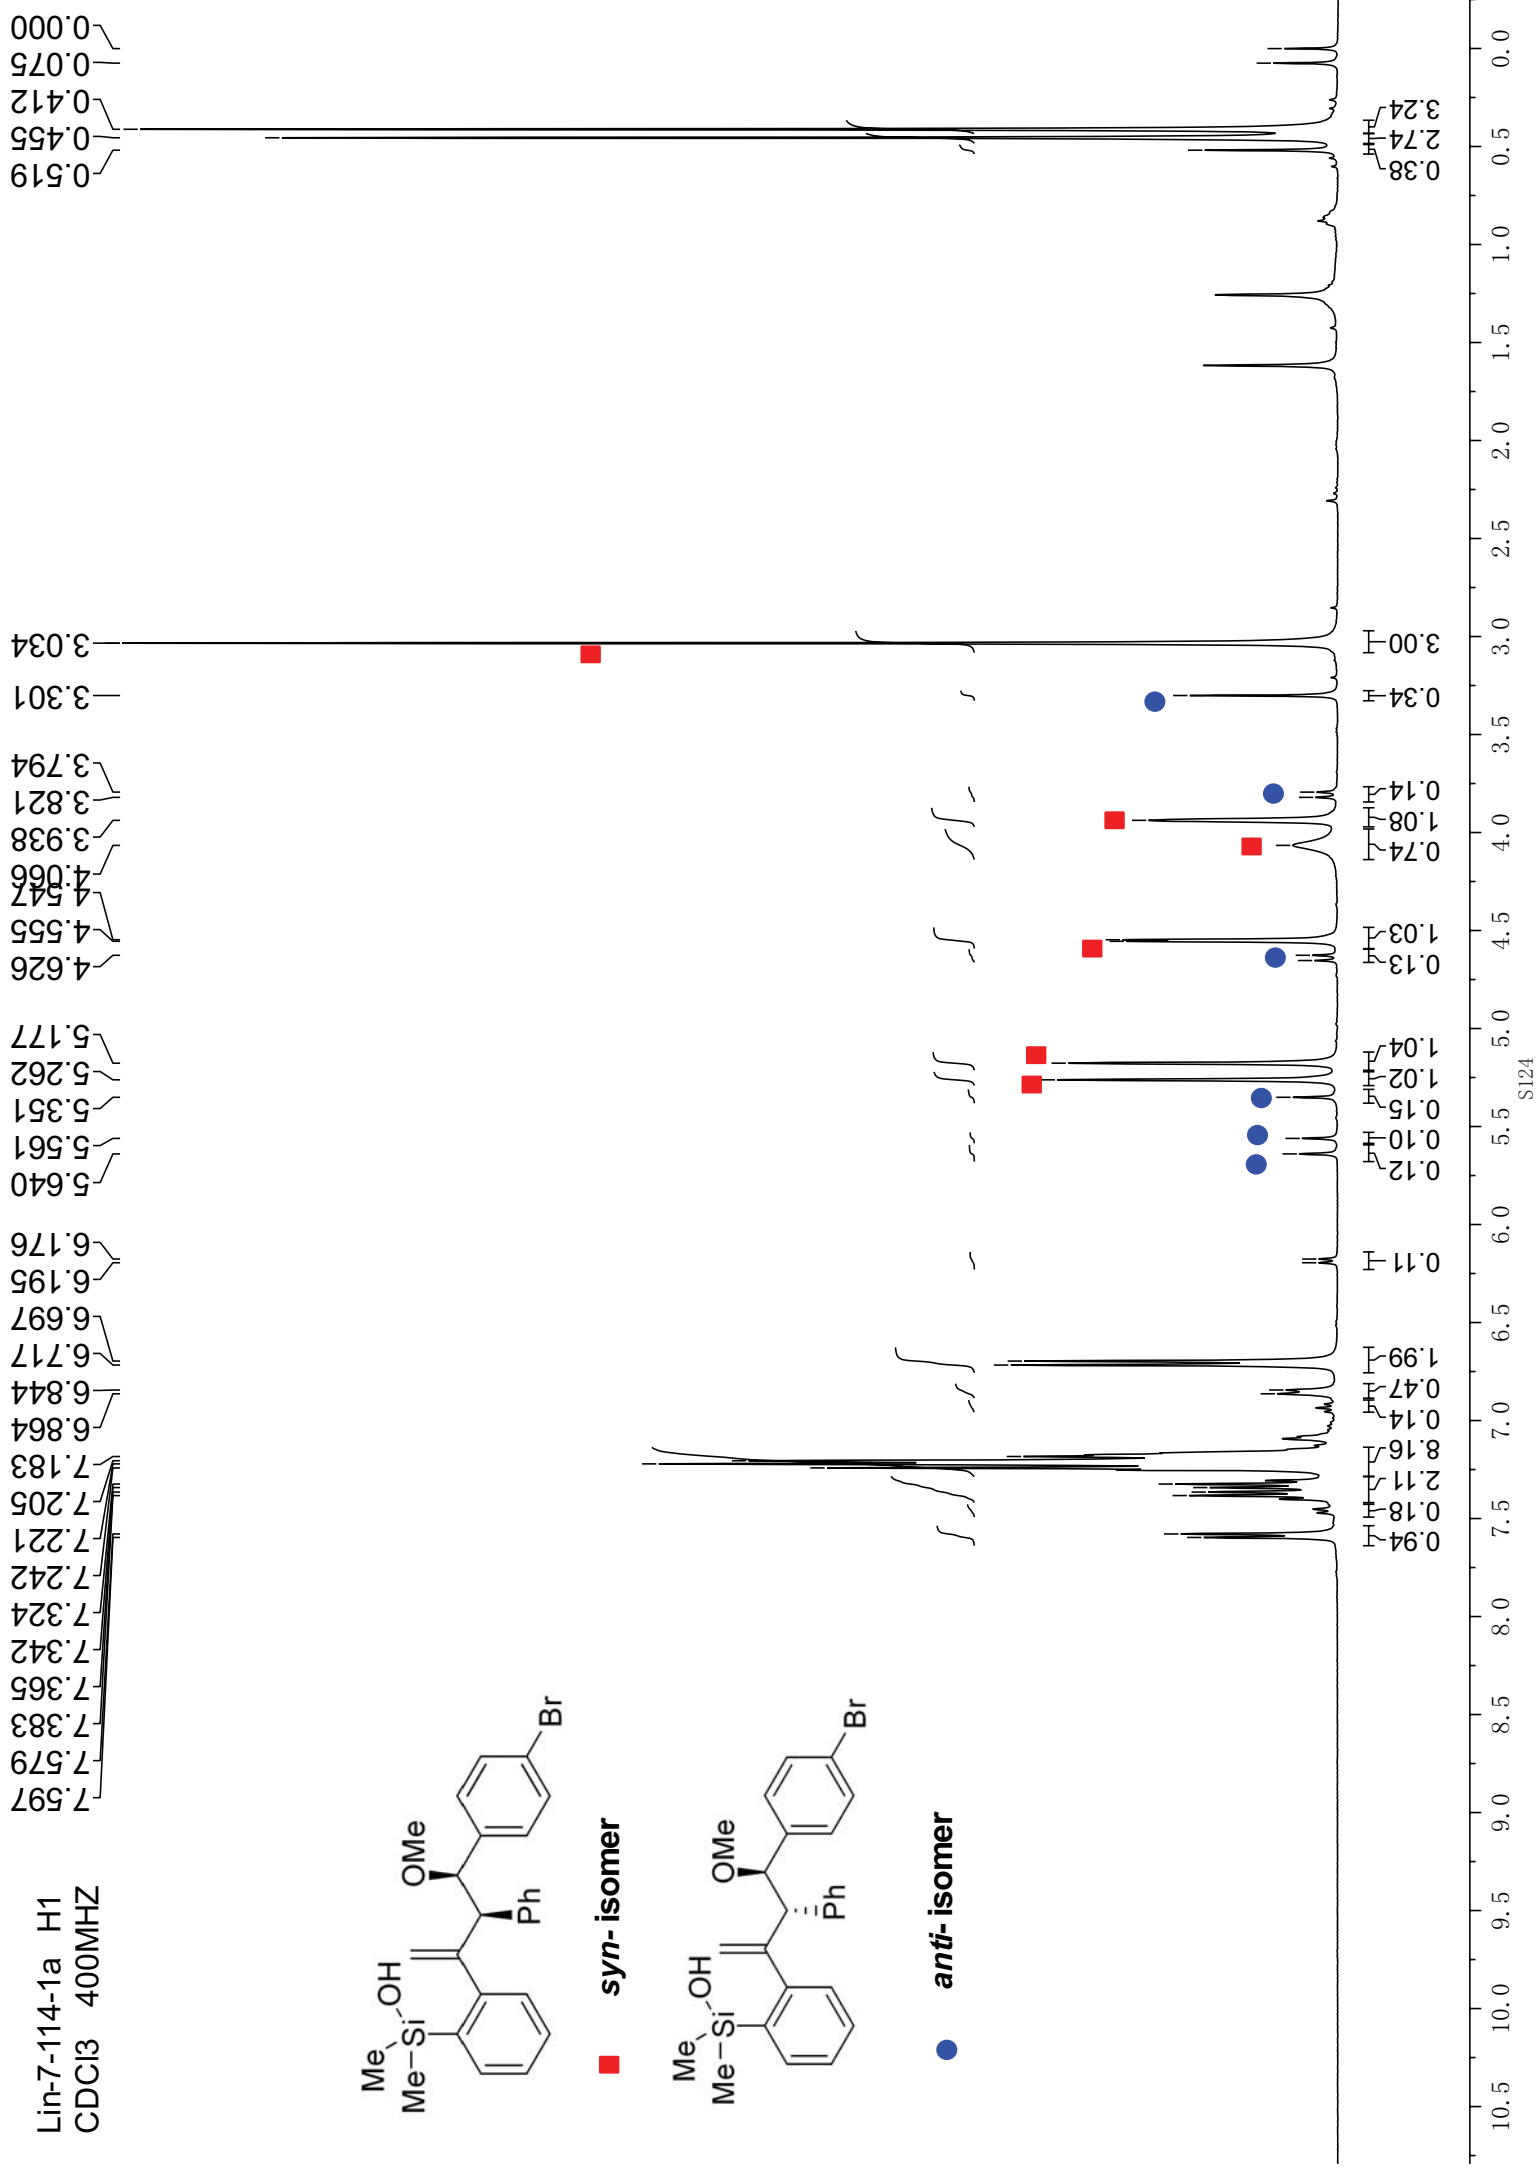

Lin-7-107-2 H1  
CDCI3 400MHZ

7.534  
7.516  
7.334  
7.317  
7.298  
7.285  
7.267  
7.261  
7.205  
7.188  
7.174  
7.158  
7.141  
6.950

0.450  
0.441

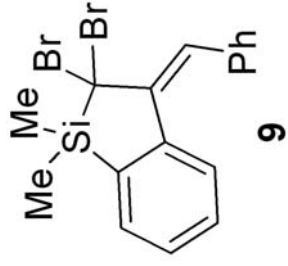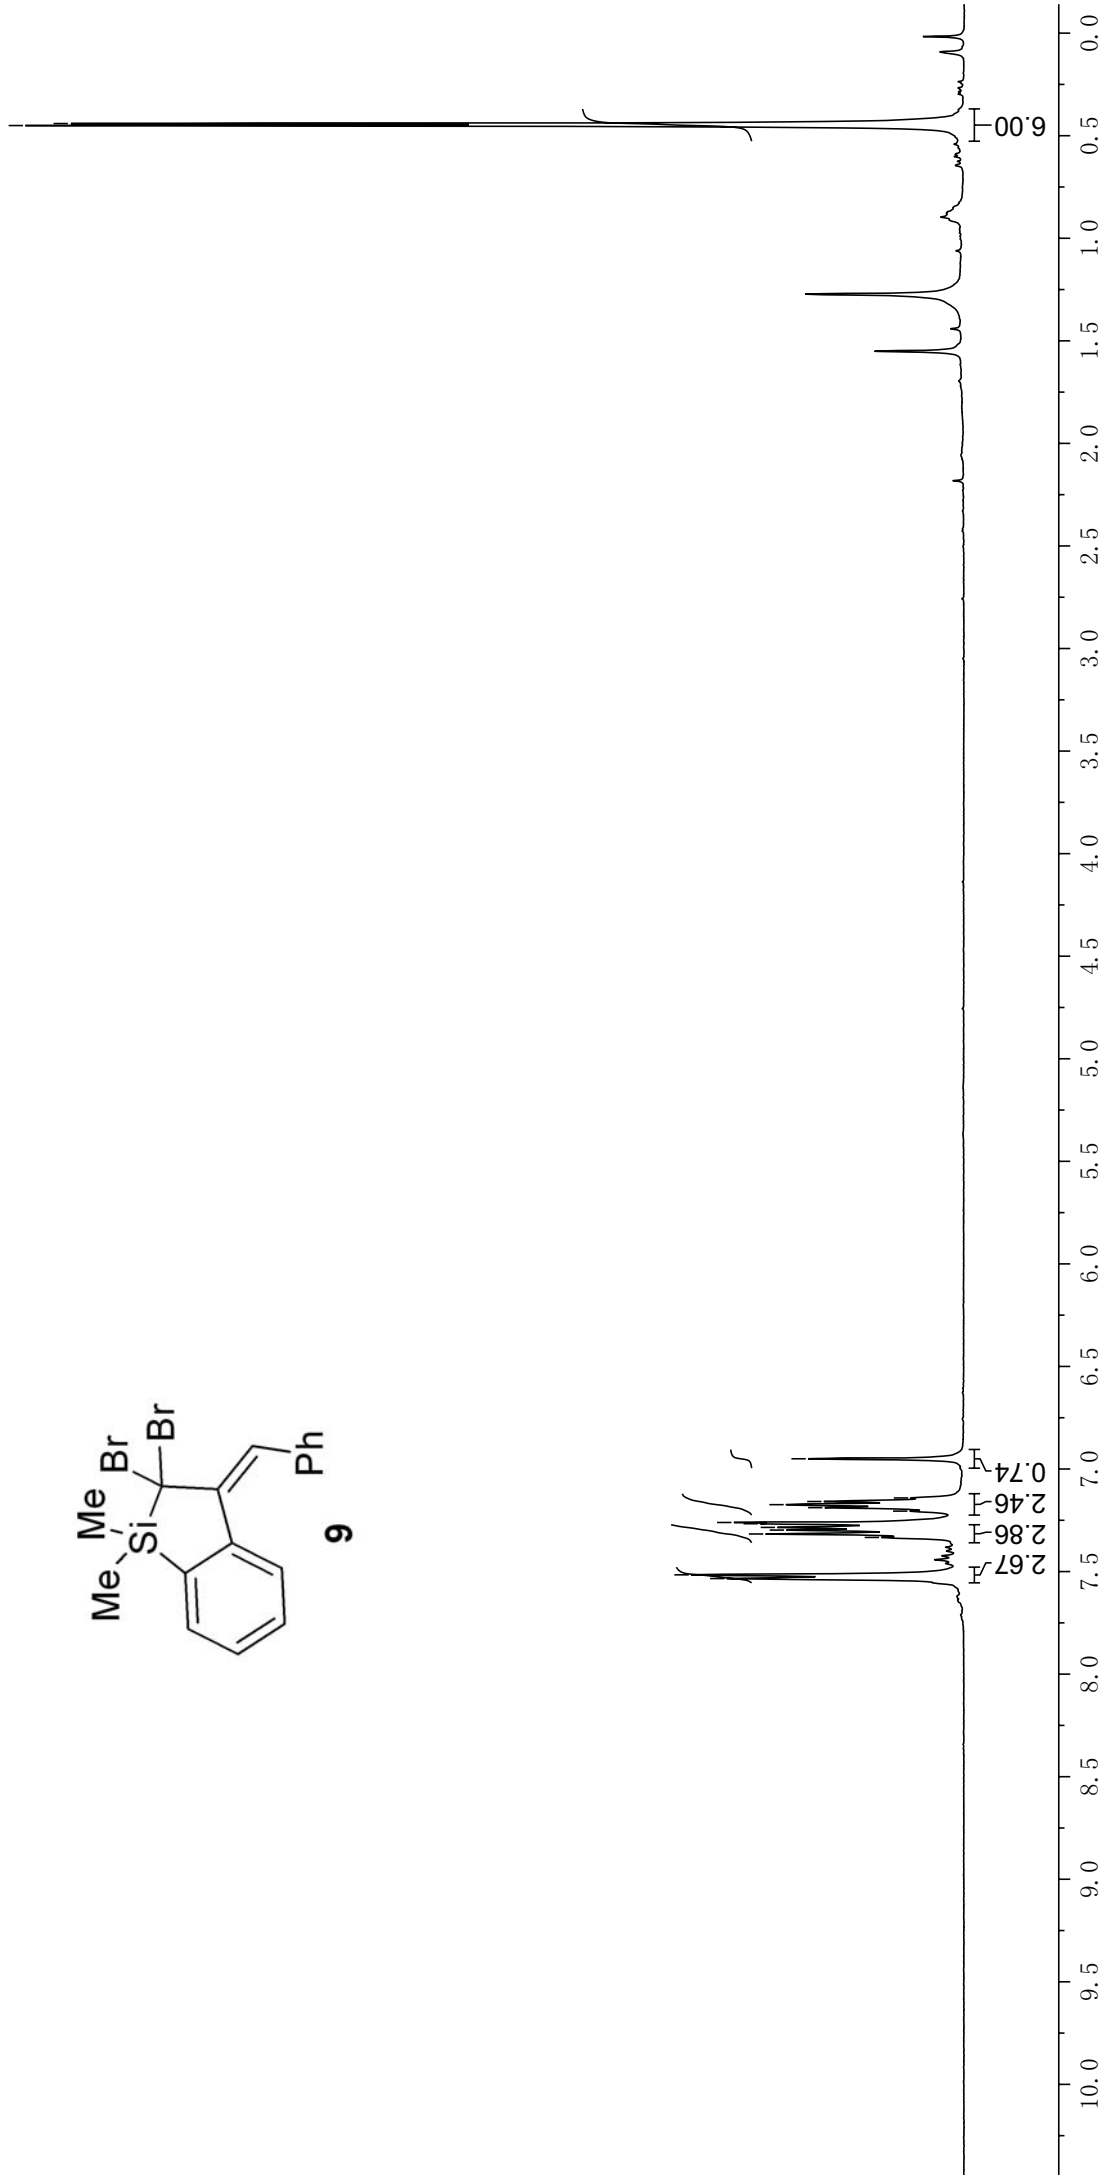

Lin-7-114-2 C13  
CDCI3 100MHZ

151.426  
144.816  
137.253  
136.926  
132.018  
129.448  
128.425  
127.758  
126.632  
125.458

77.318  
77.000  
76.683

49.574

4.770  
5.244

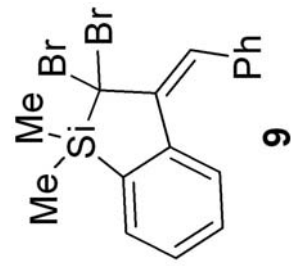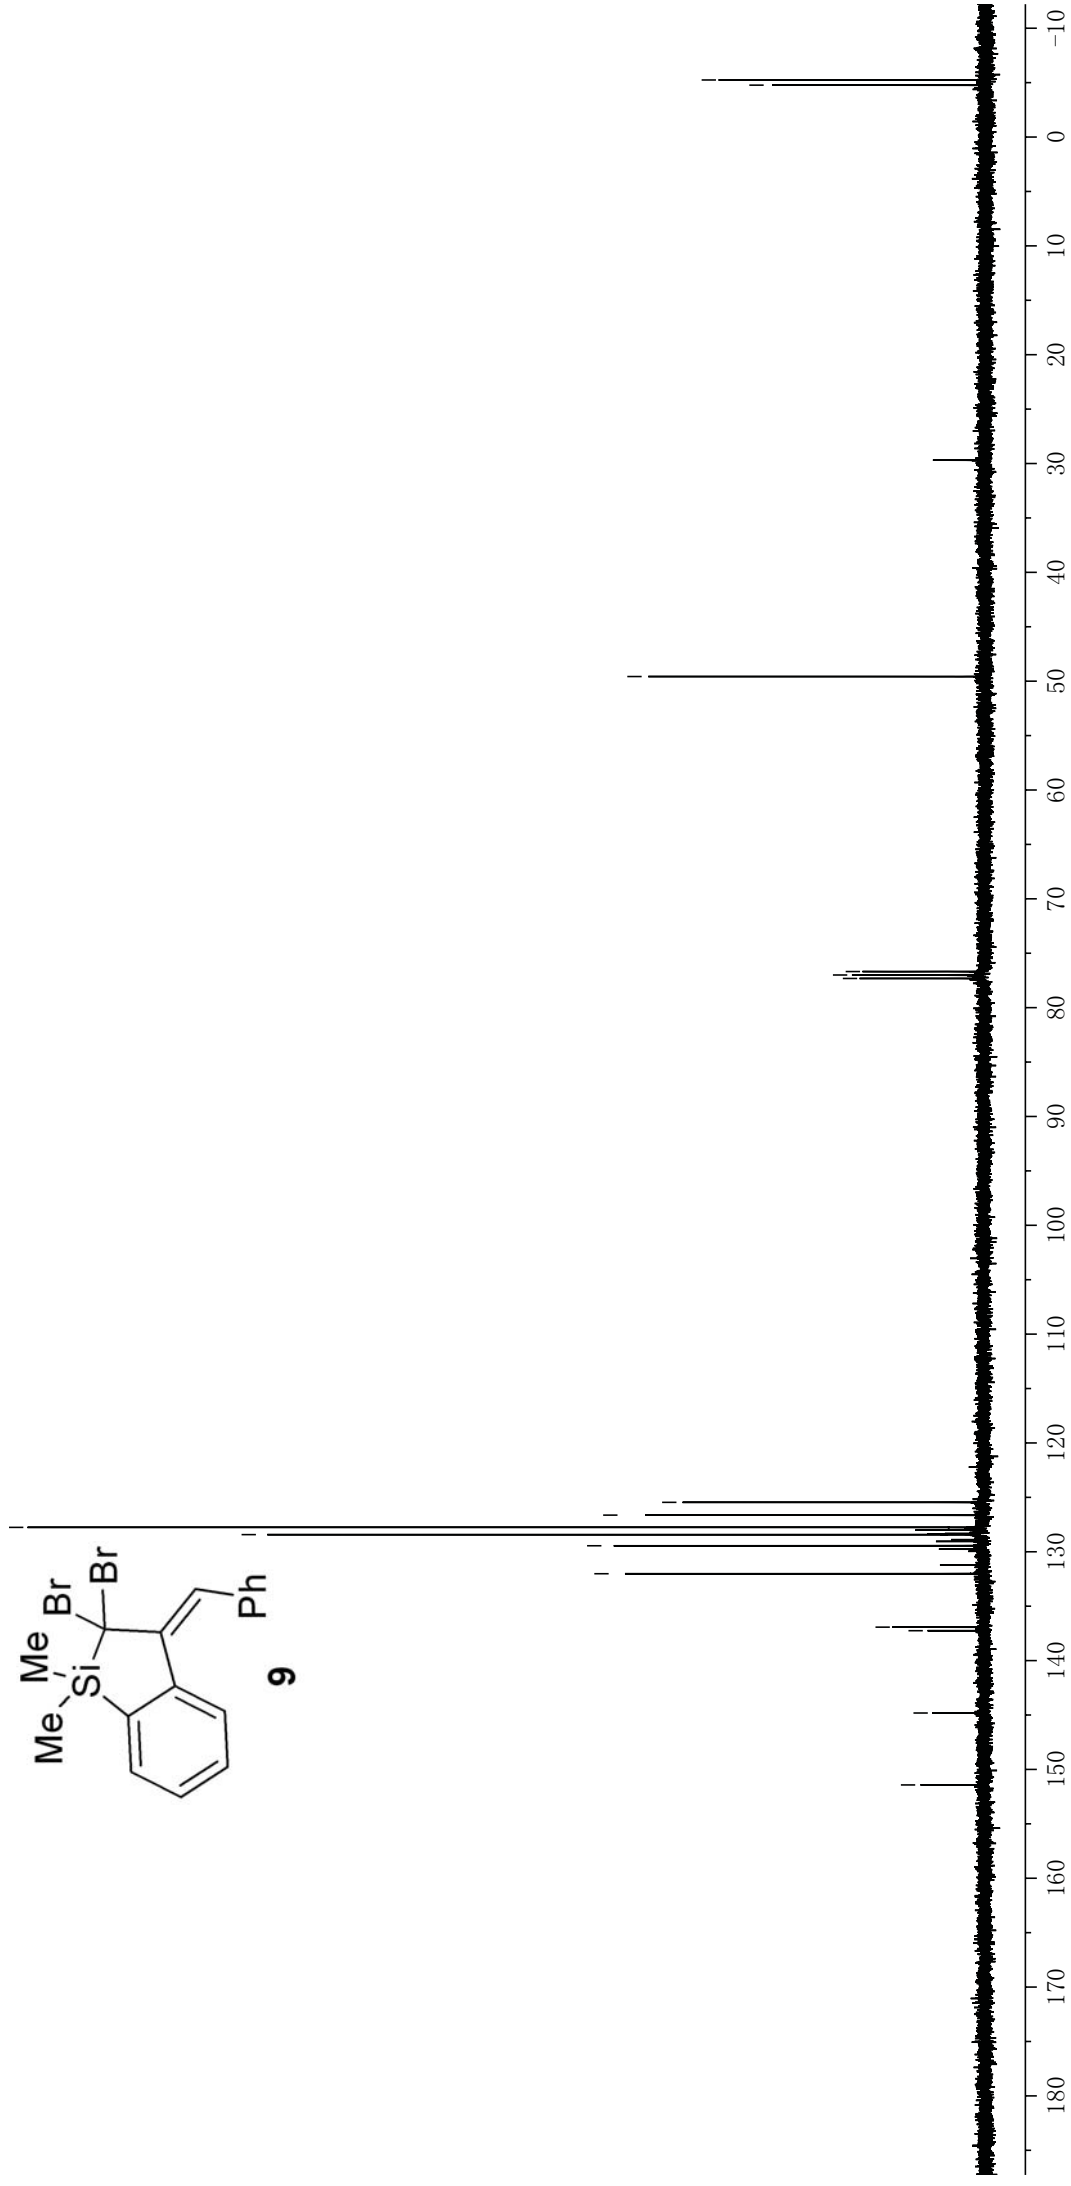

Lin-8-1-2a\_H1  
CDCI3 400MHZ

7.260  
7.233  
7.214  
7.143  
7.135  
7.026  
7.017  
7.008  
6.980  
6.973  
6.952  
6.880  
6.860  
6.850

4.451

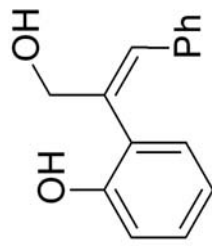

10

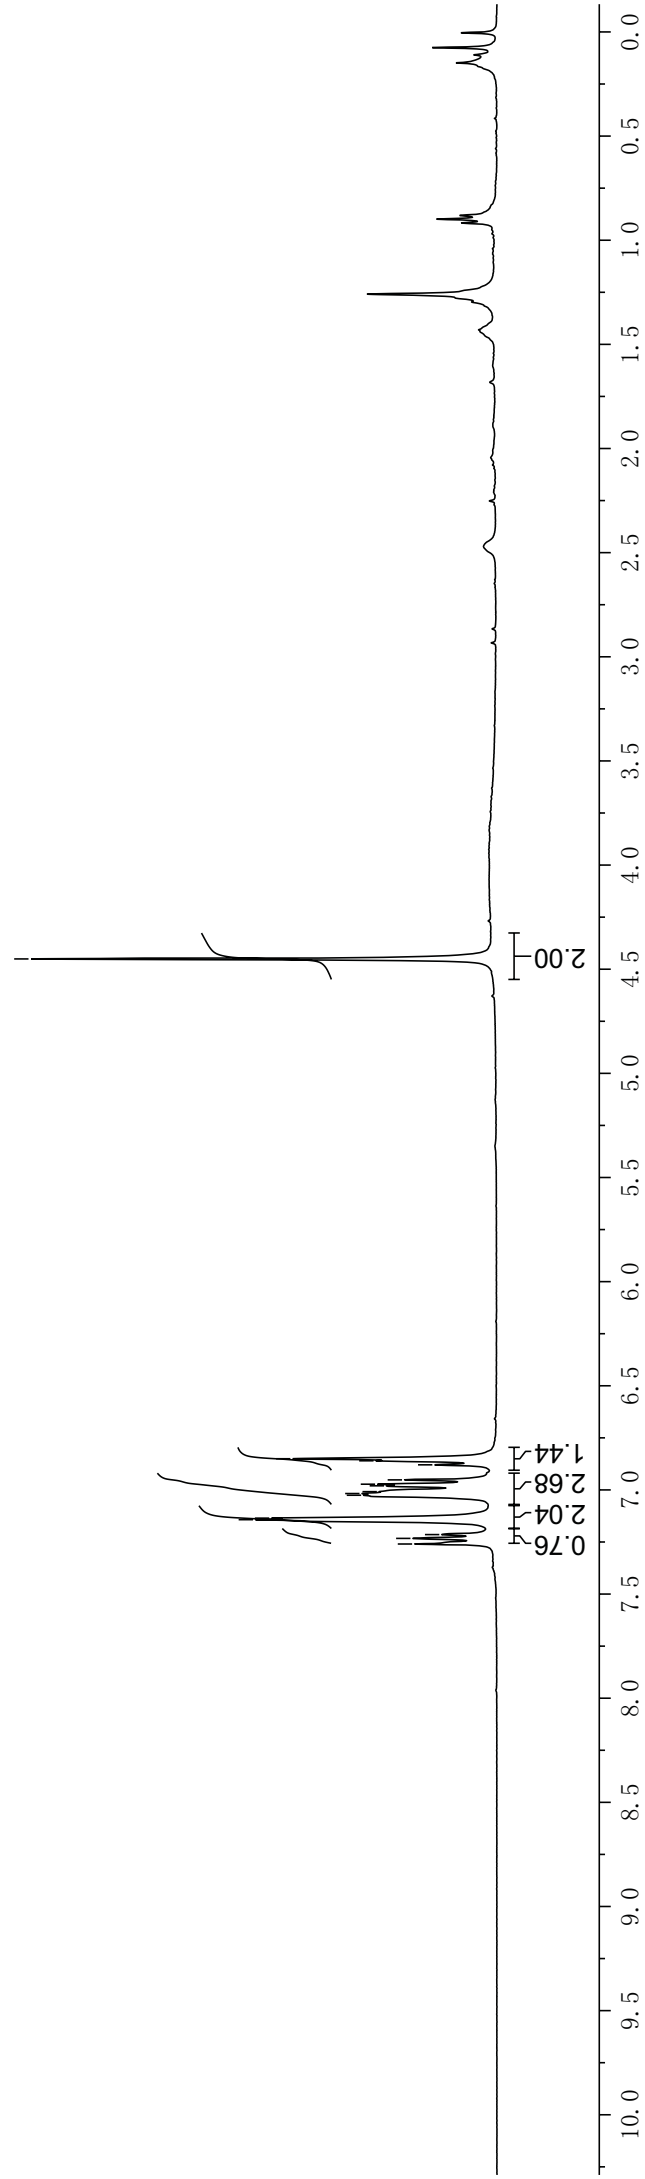

Lin-8-1-2a C13  
CDCI3 100MHZ

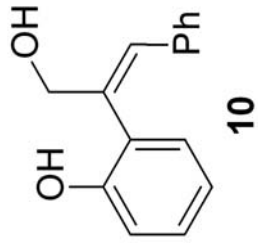

153.718  
136.201  
135.514  
132.148  
129.821  
129.540  
128.959  
128.183  
127.709  
125.465  
120.818  
116.666  
77.318  
77.000  
76.683  
69.776

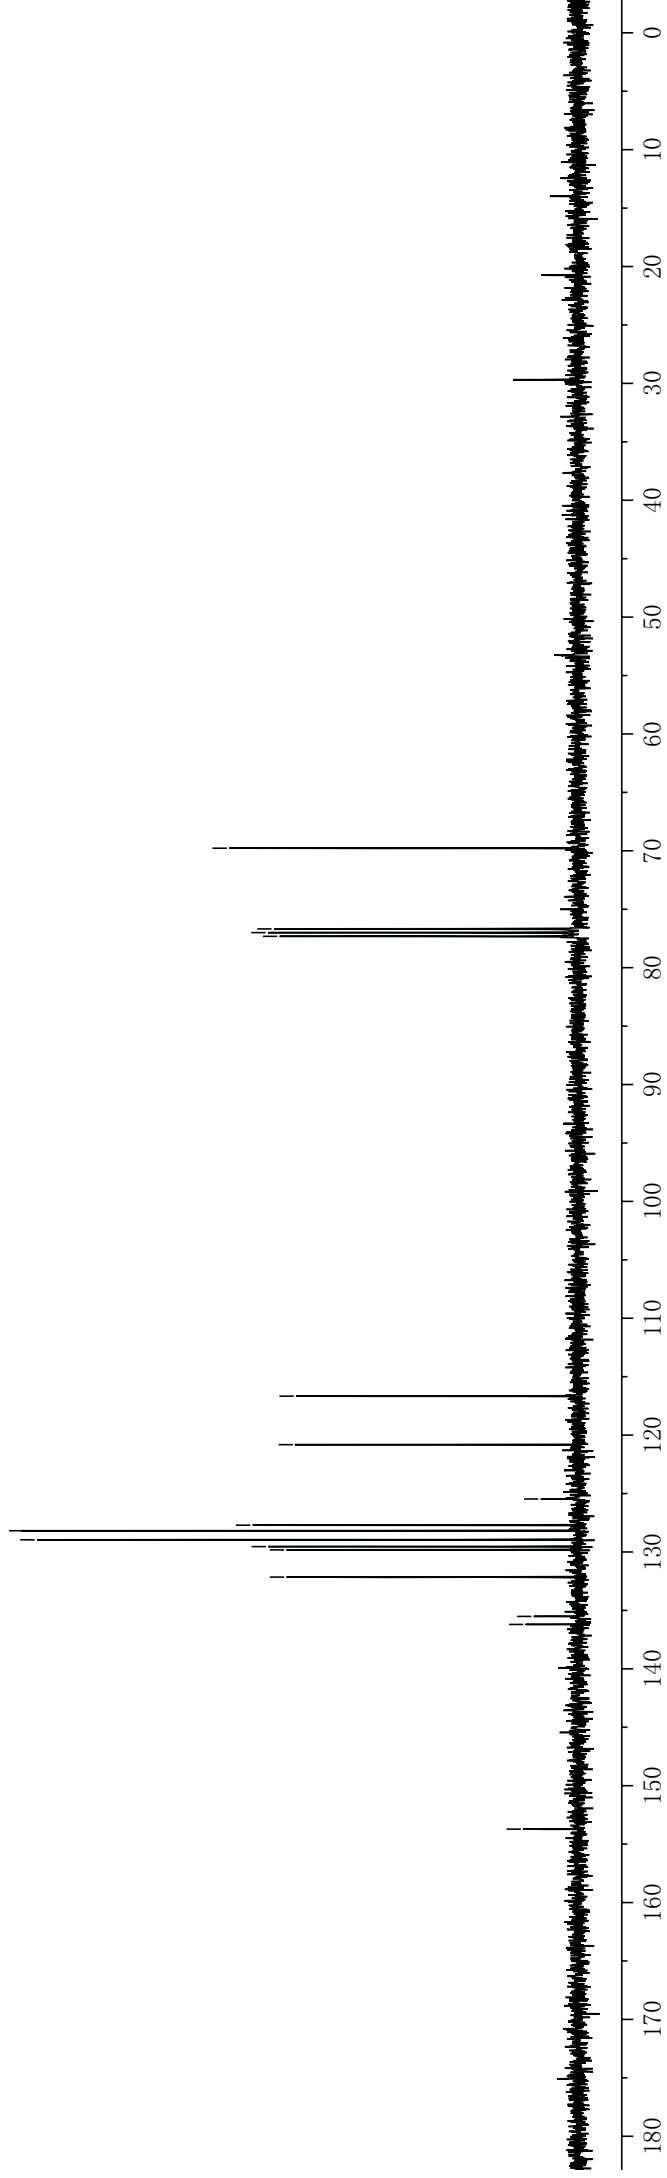



Lin-7-116-2 H1  
CDCI3 400MHZ

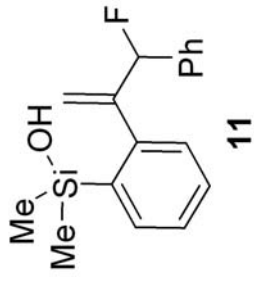

0.425  
0.412

2.161

5.256

5.574

6.114

6.229

6.733

6.751

7.190

7.208

7.227

7.261

7.272

7.292

7.312

7.330

7.356

7.591

7.609

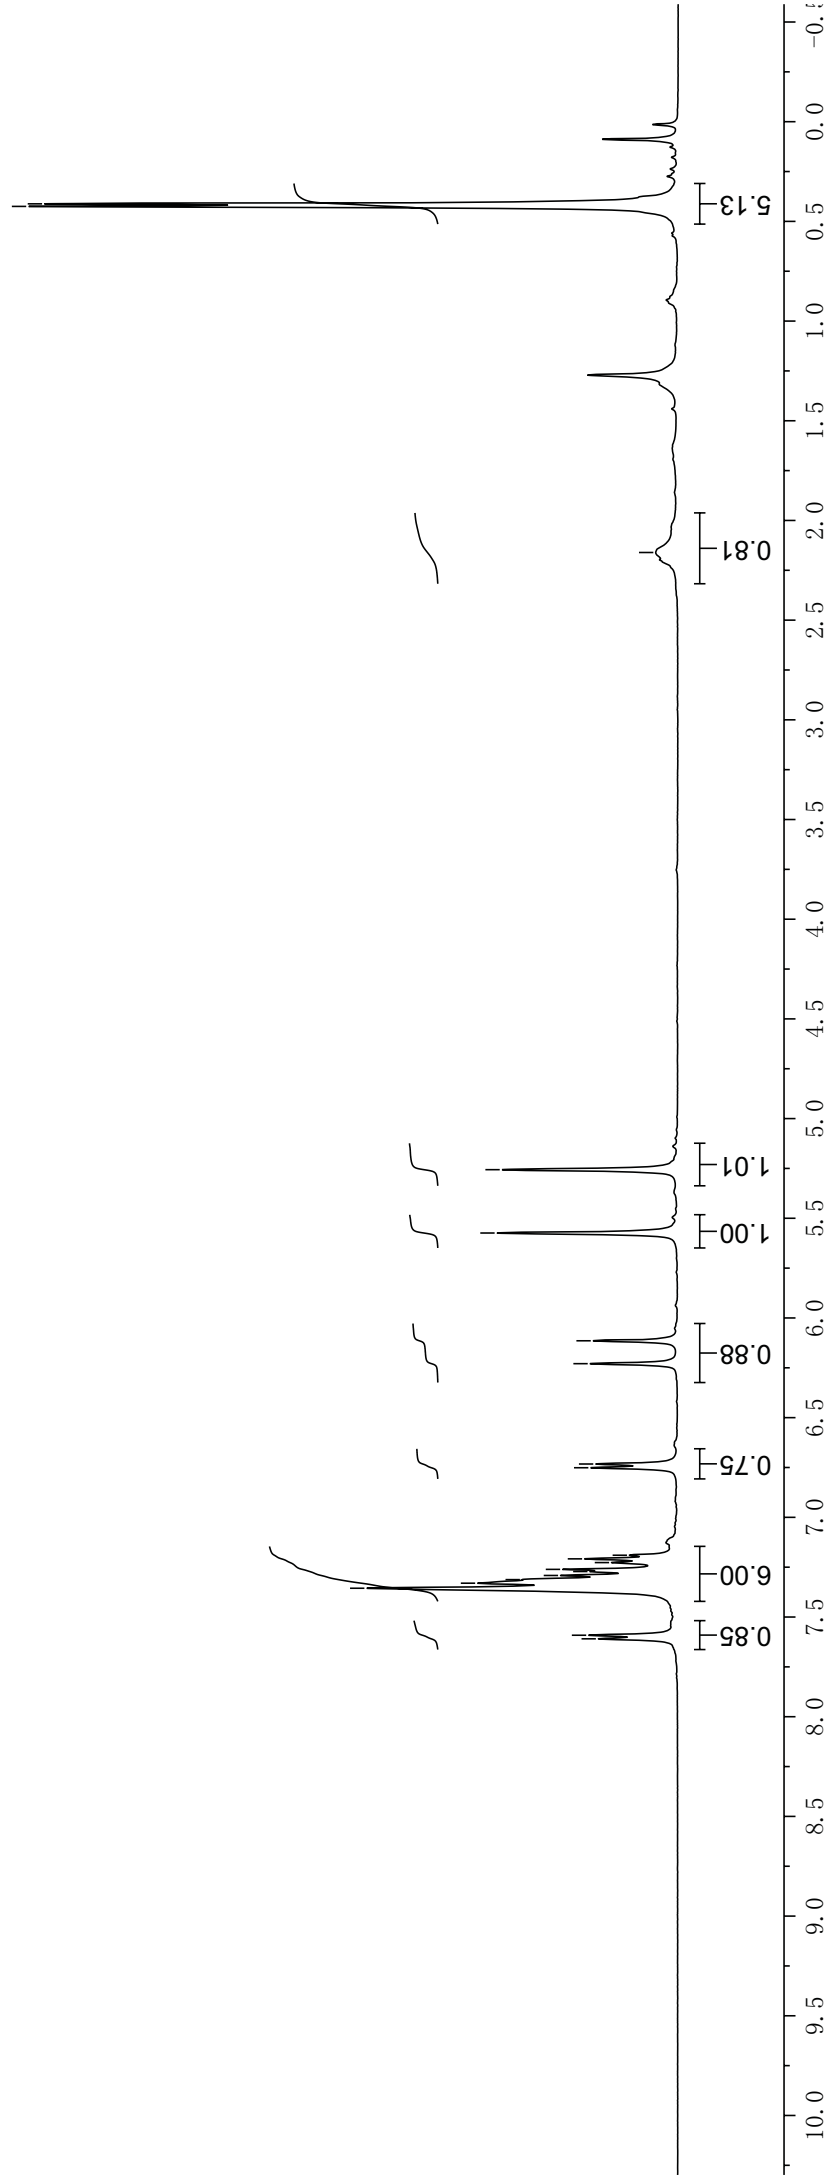

Lin-7-116-2 C13  
CDCI3 100MHZ

150.207  
149.999  
144.154  
138.183  
137.421  
134.347  
129.176  
128.750  
128.723  
128.702  
128.349  
126.930  
126.879  
126.868  
126.868  
116.846  
116.764

96.594  
94.847  
77.319  
77.000  
76.682

2.144  
1.858

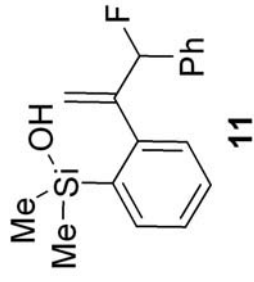

128.750  
128.723  
128.702  
128.349  
127.0  
127.4  
126.930  
126.879  
126.868

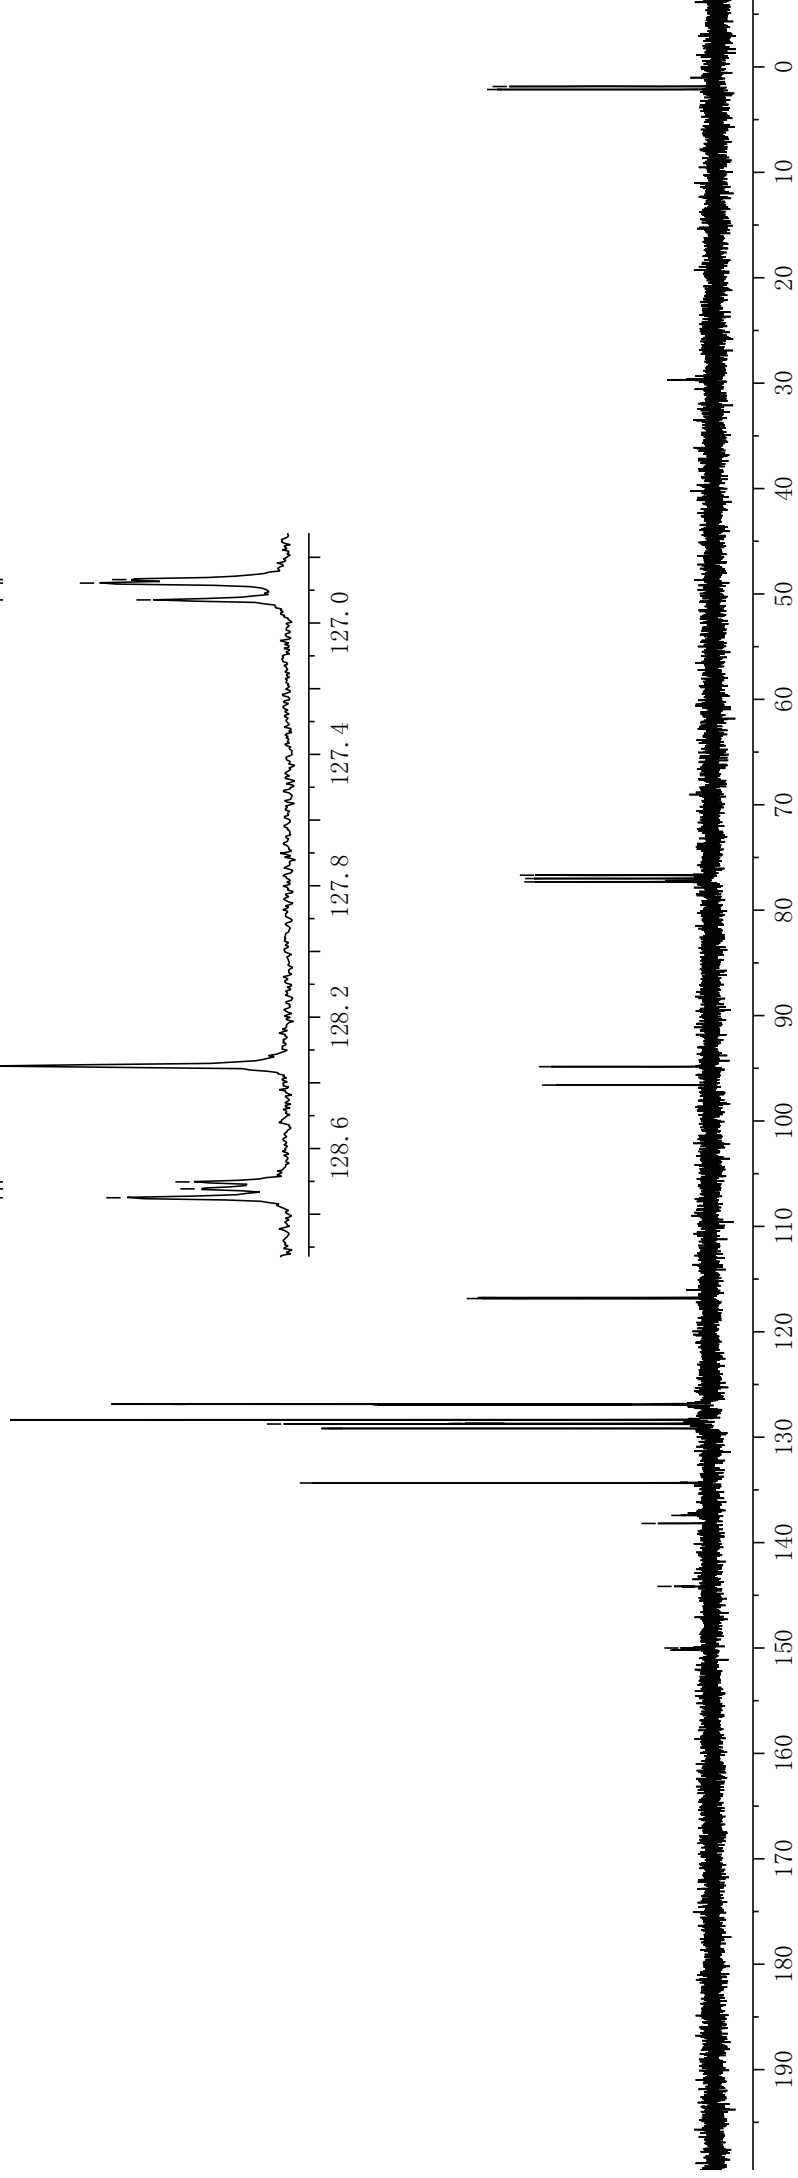

Supplement: c6cc00635c1.pdf [file c6cc00635c1.pdf]
